# Supplementary material
Source: MDPI journal article supplement (https://www.mdpi.com/2036-7481/15/2/37)
Supplement: s1 [file s1]

Archive with 11 entries (11 files):
- BC1.pdf
- BC2.pdf
- BC3.pdf
- BC4.pdf
- BC5.pdf
- BC6.pdf
- BC7.pdf
- BC9.pdf
- BC10.pdf
- Figure S1 and S2 and Table S1 Map with Locations.pdf
- Figure S3-S22 and Table S2 Agarosegel add info.pdf
