# Supplementary material
Source: MDPI journal article supplement (https://www.mdpi.com/2036-7481/15/2/37)

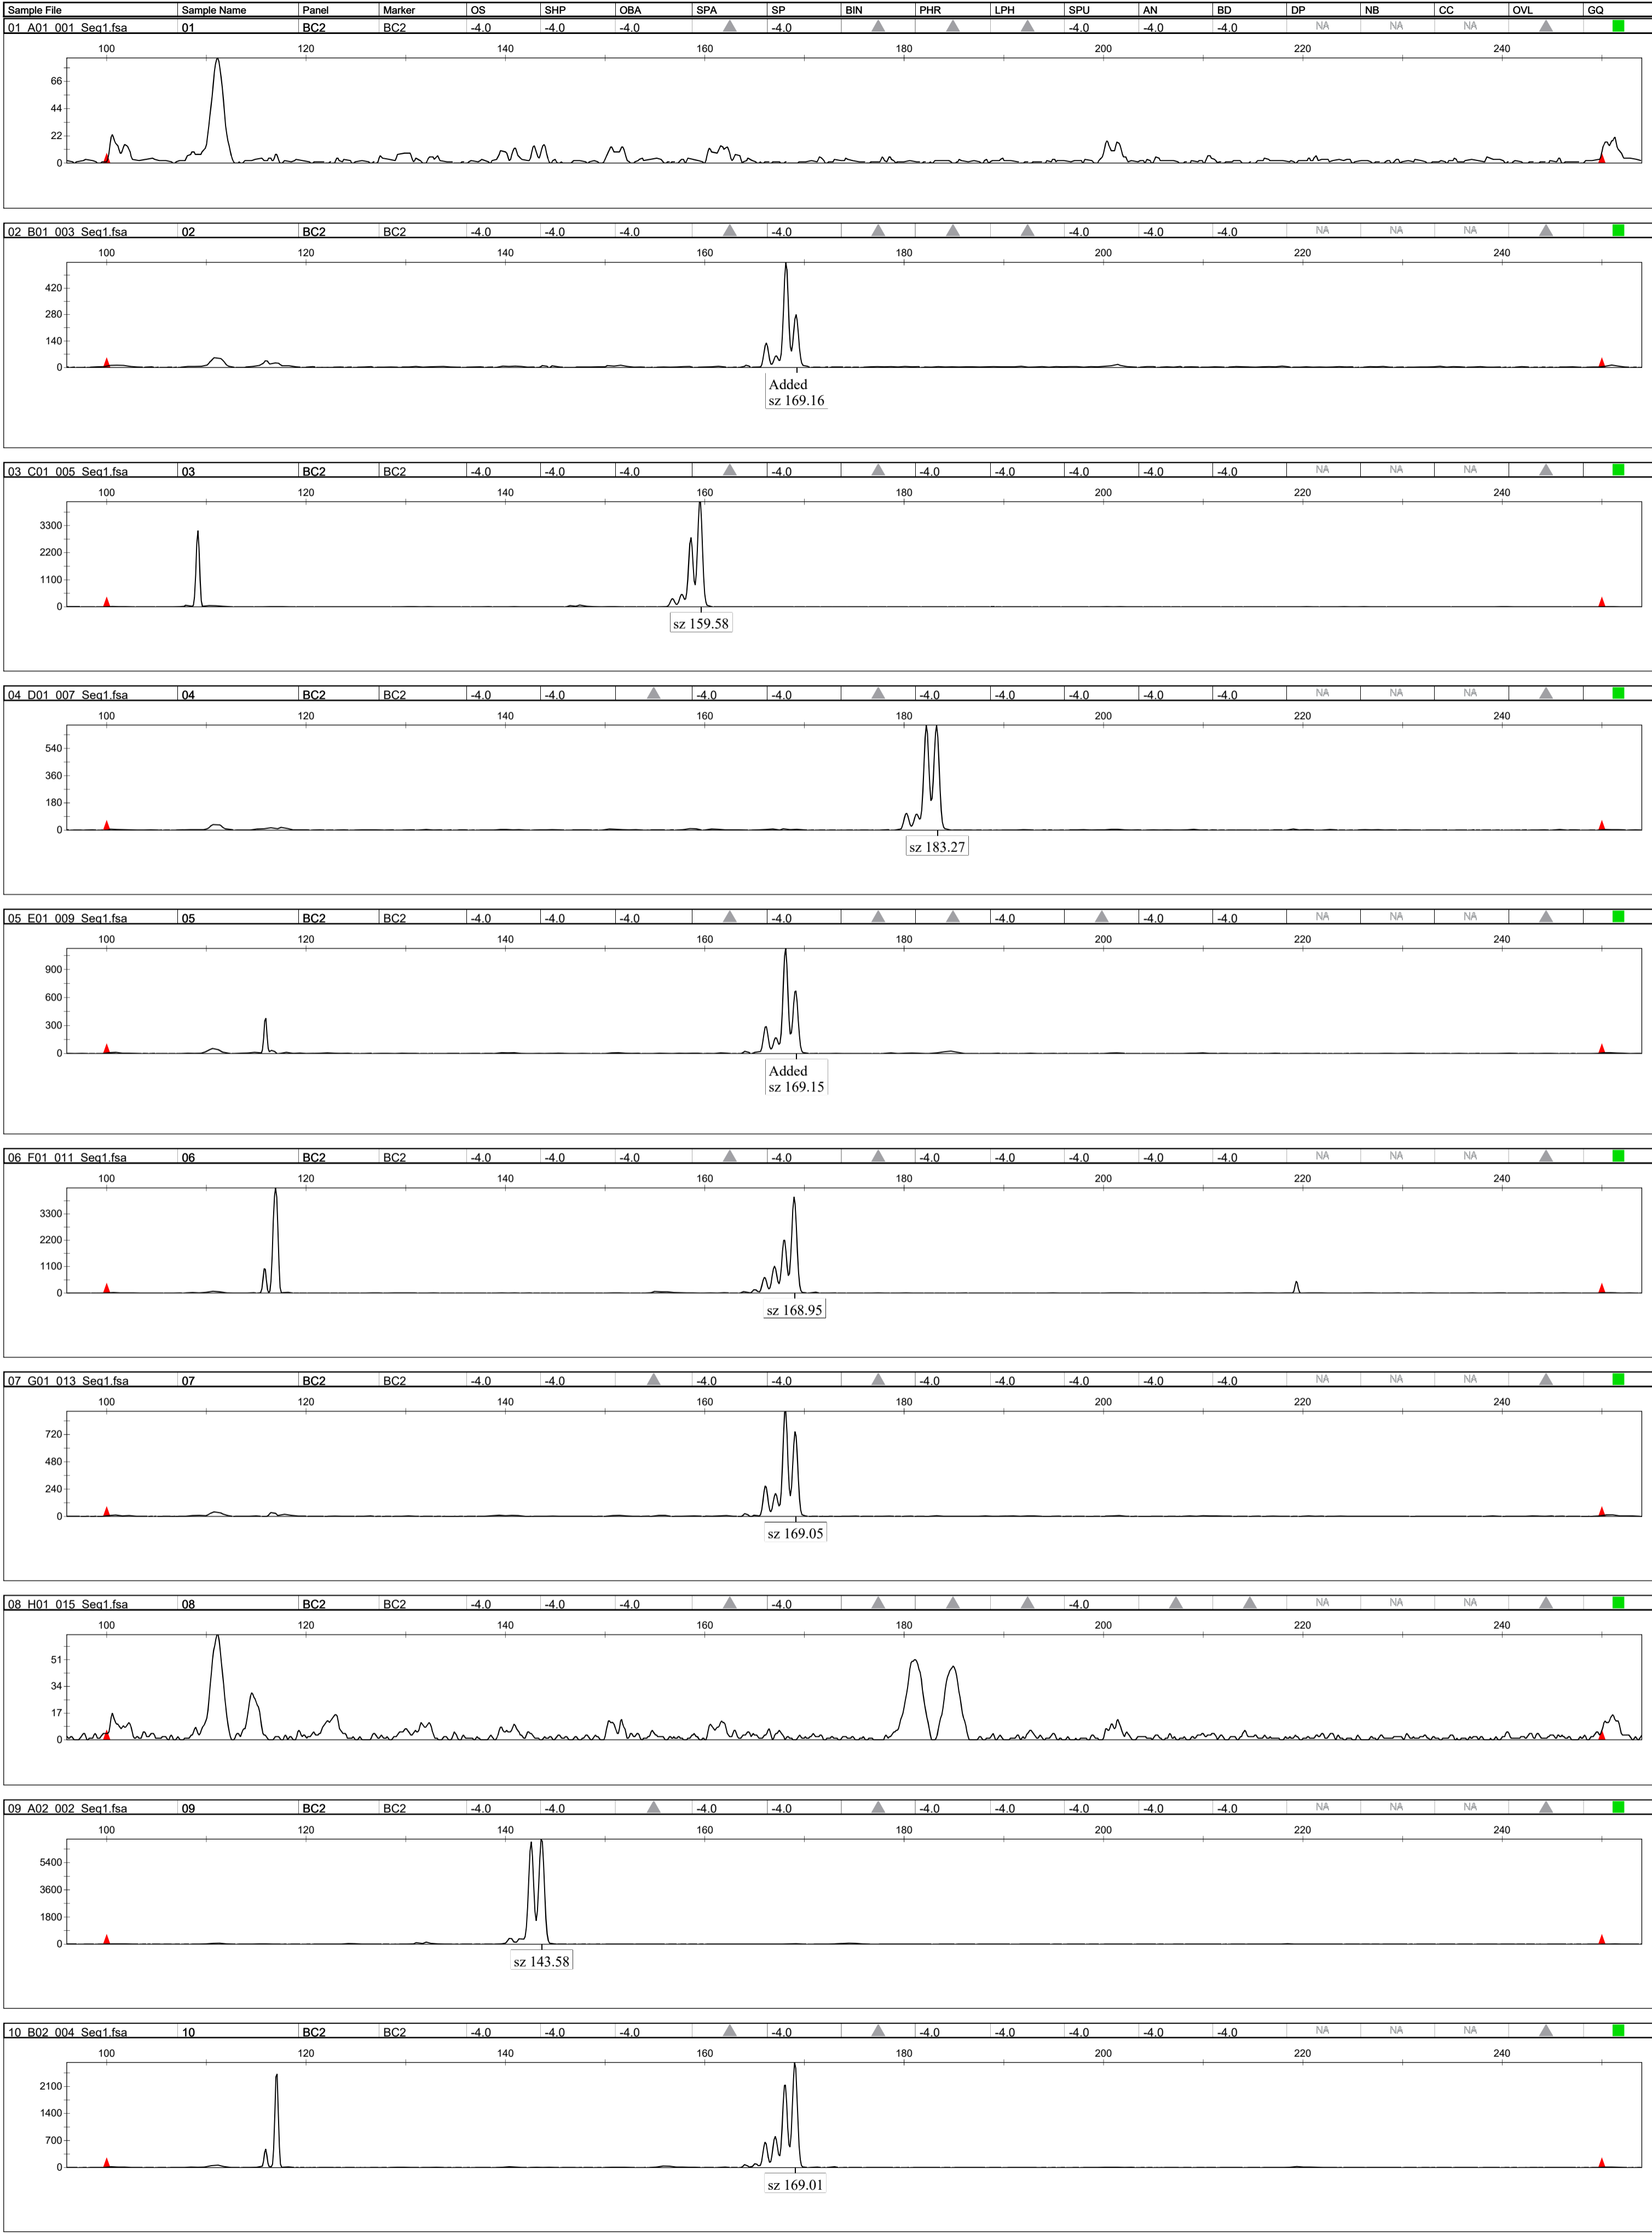

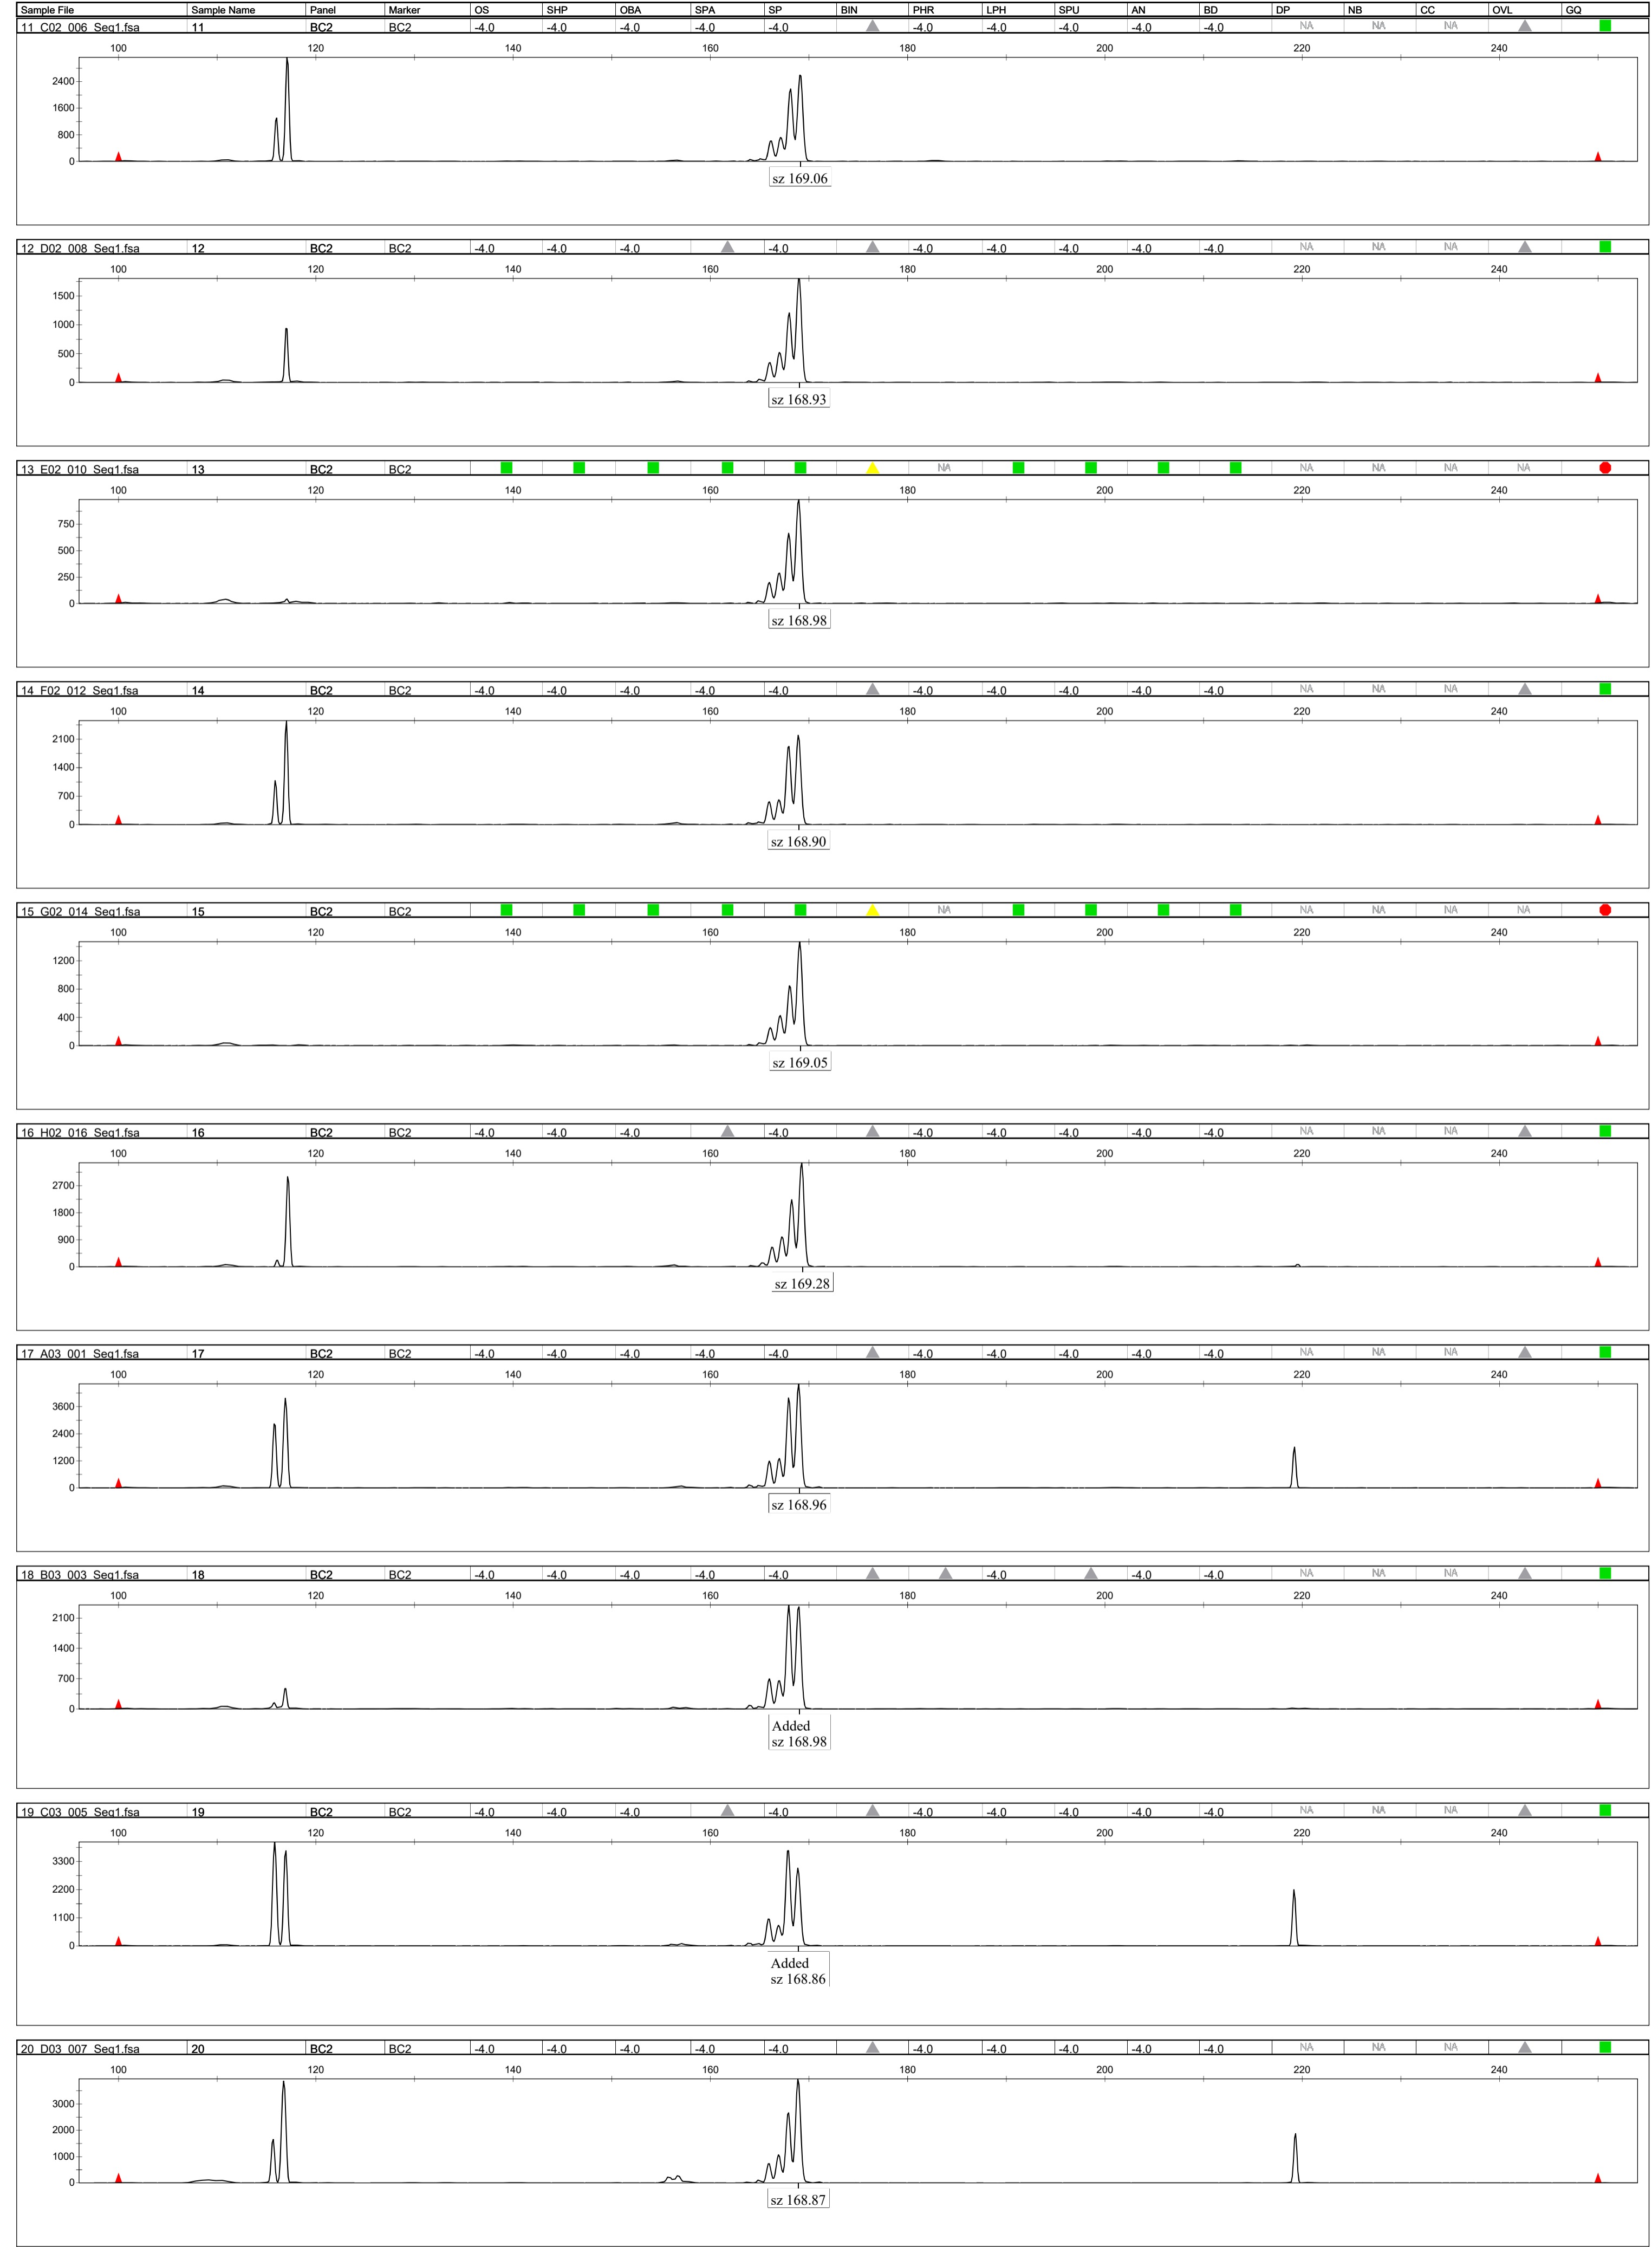

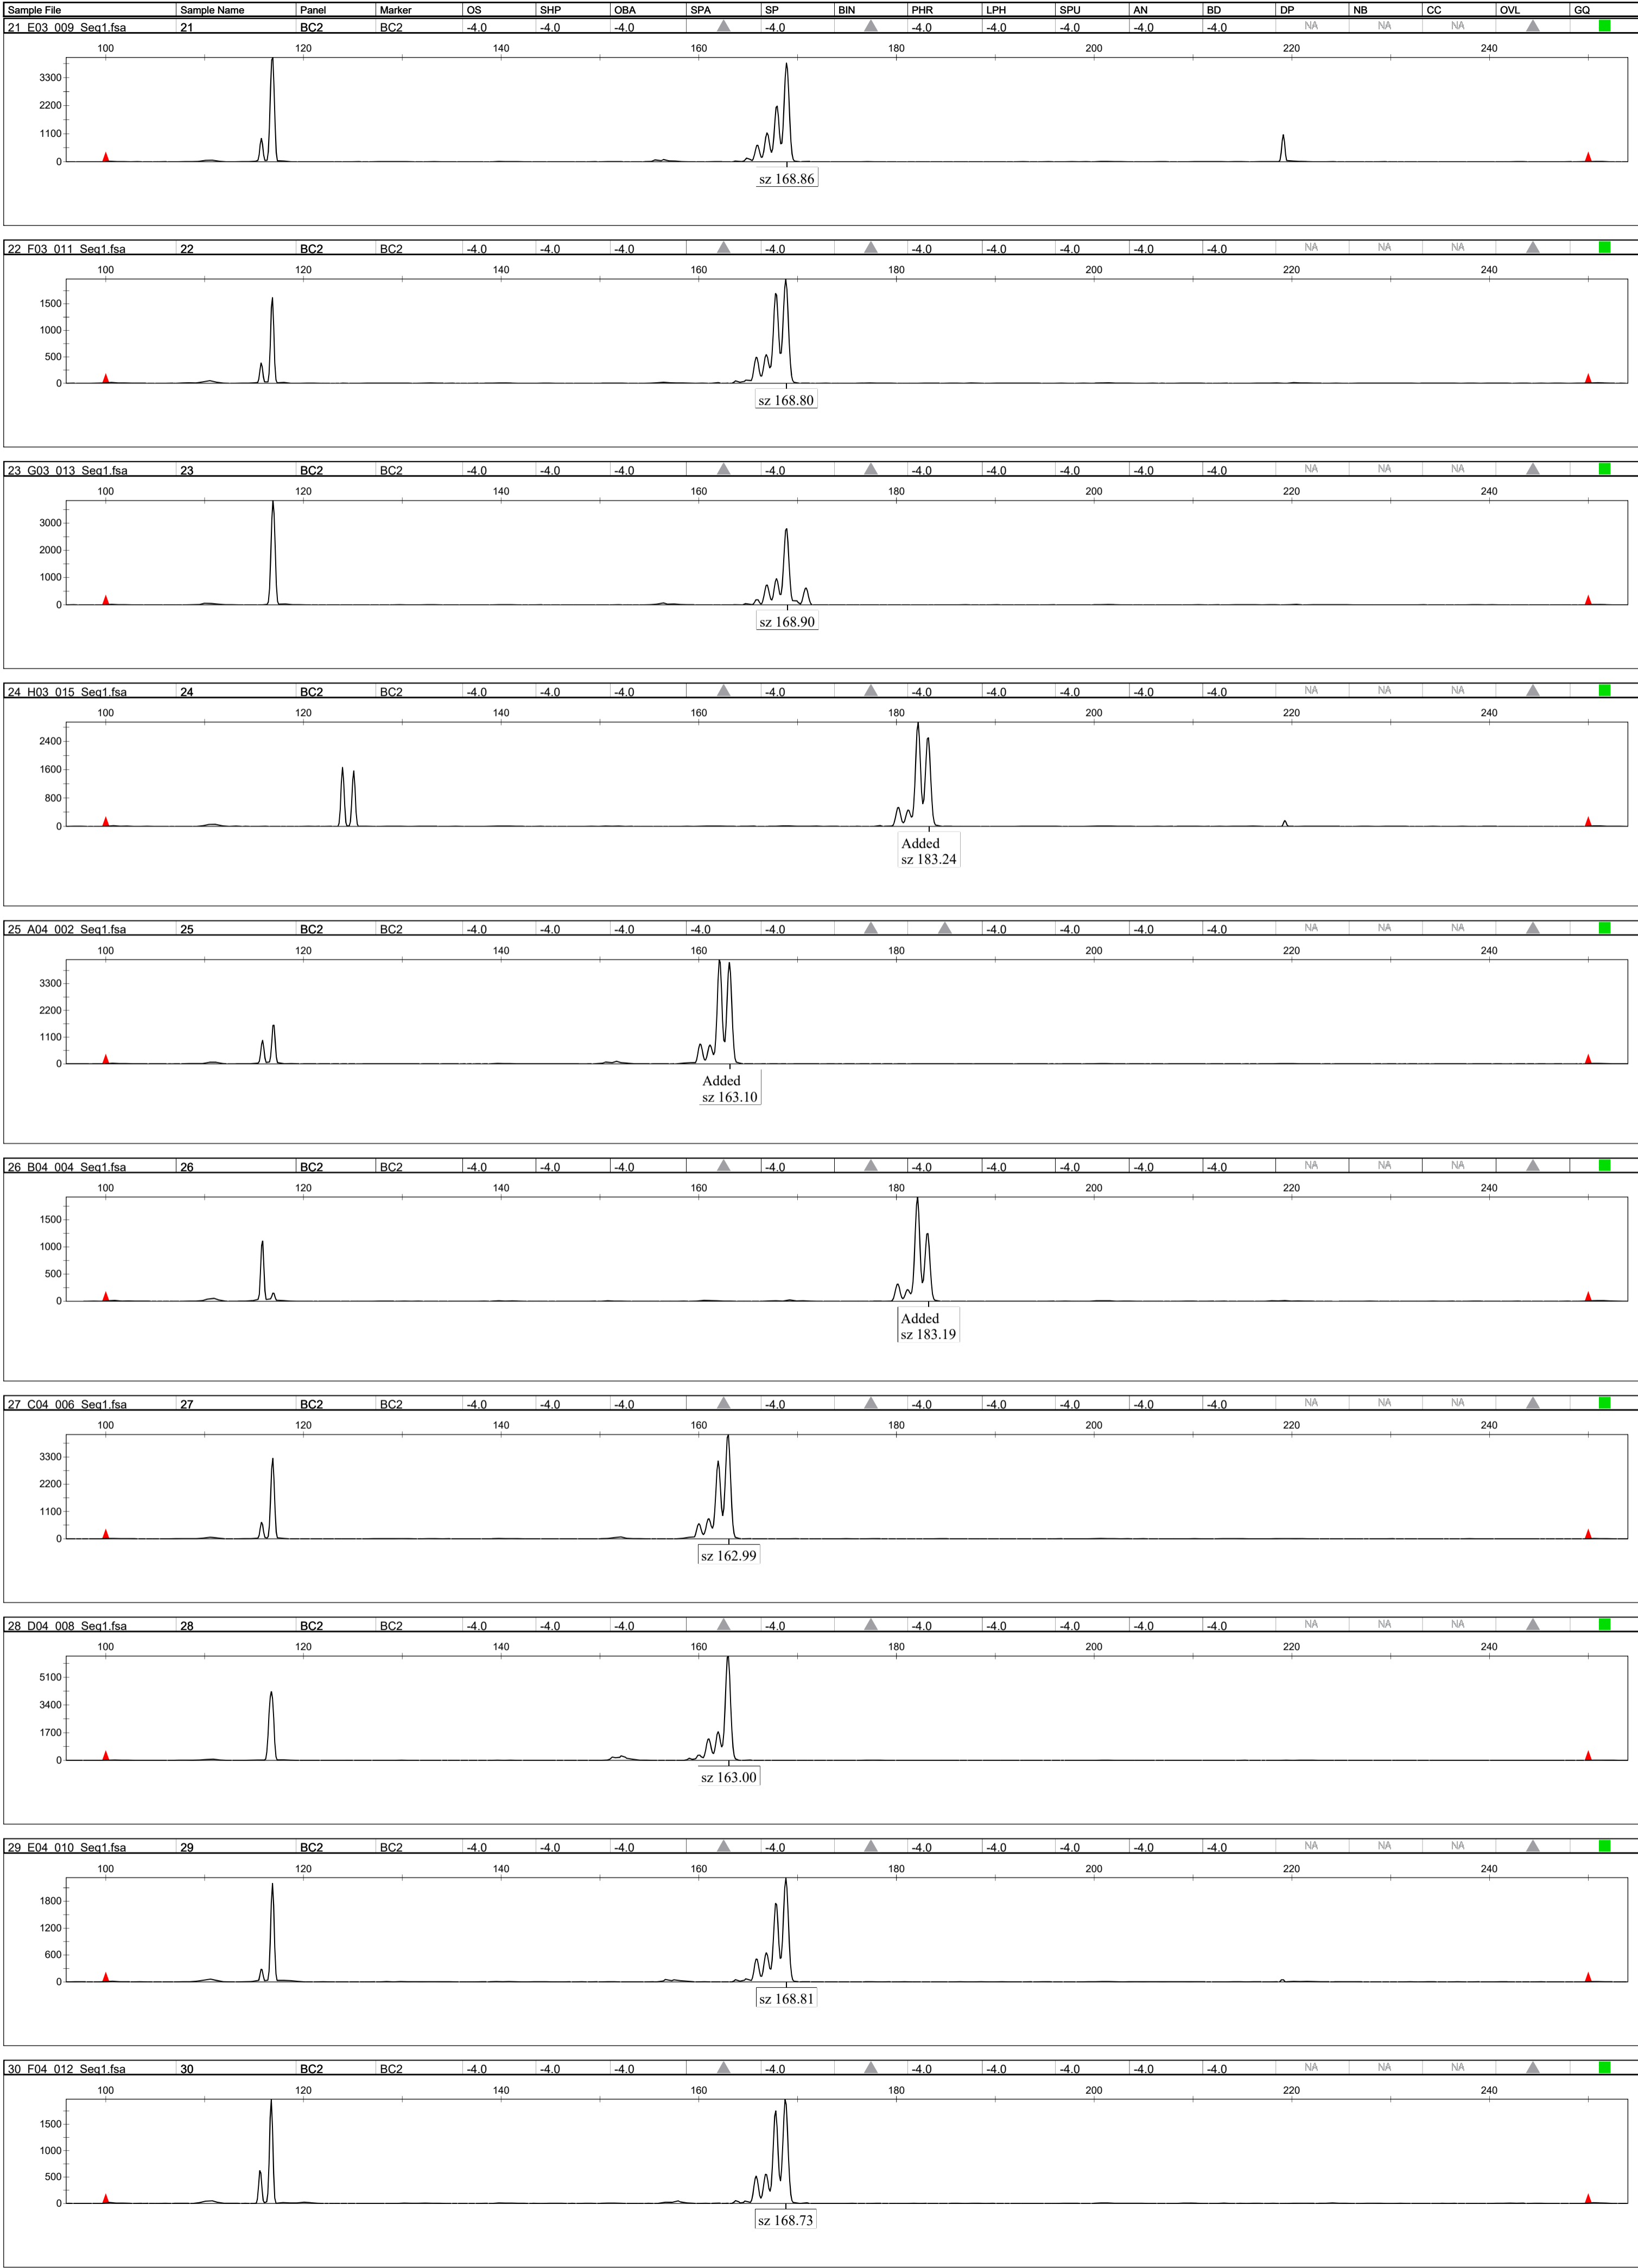

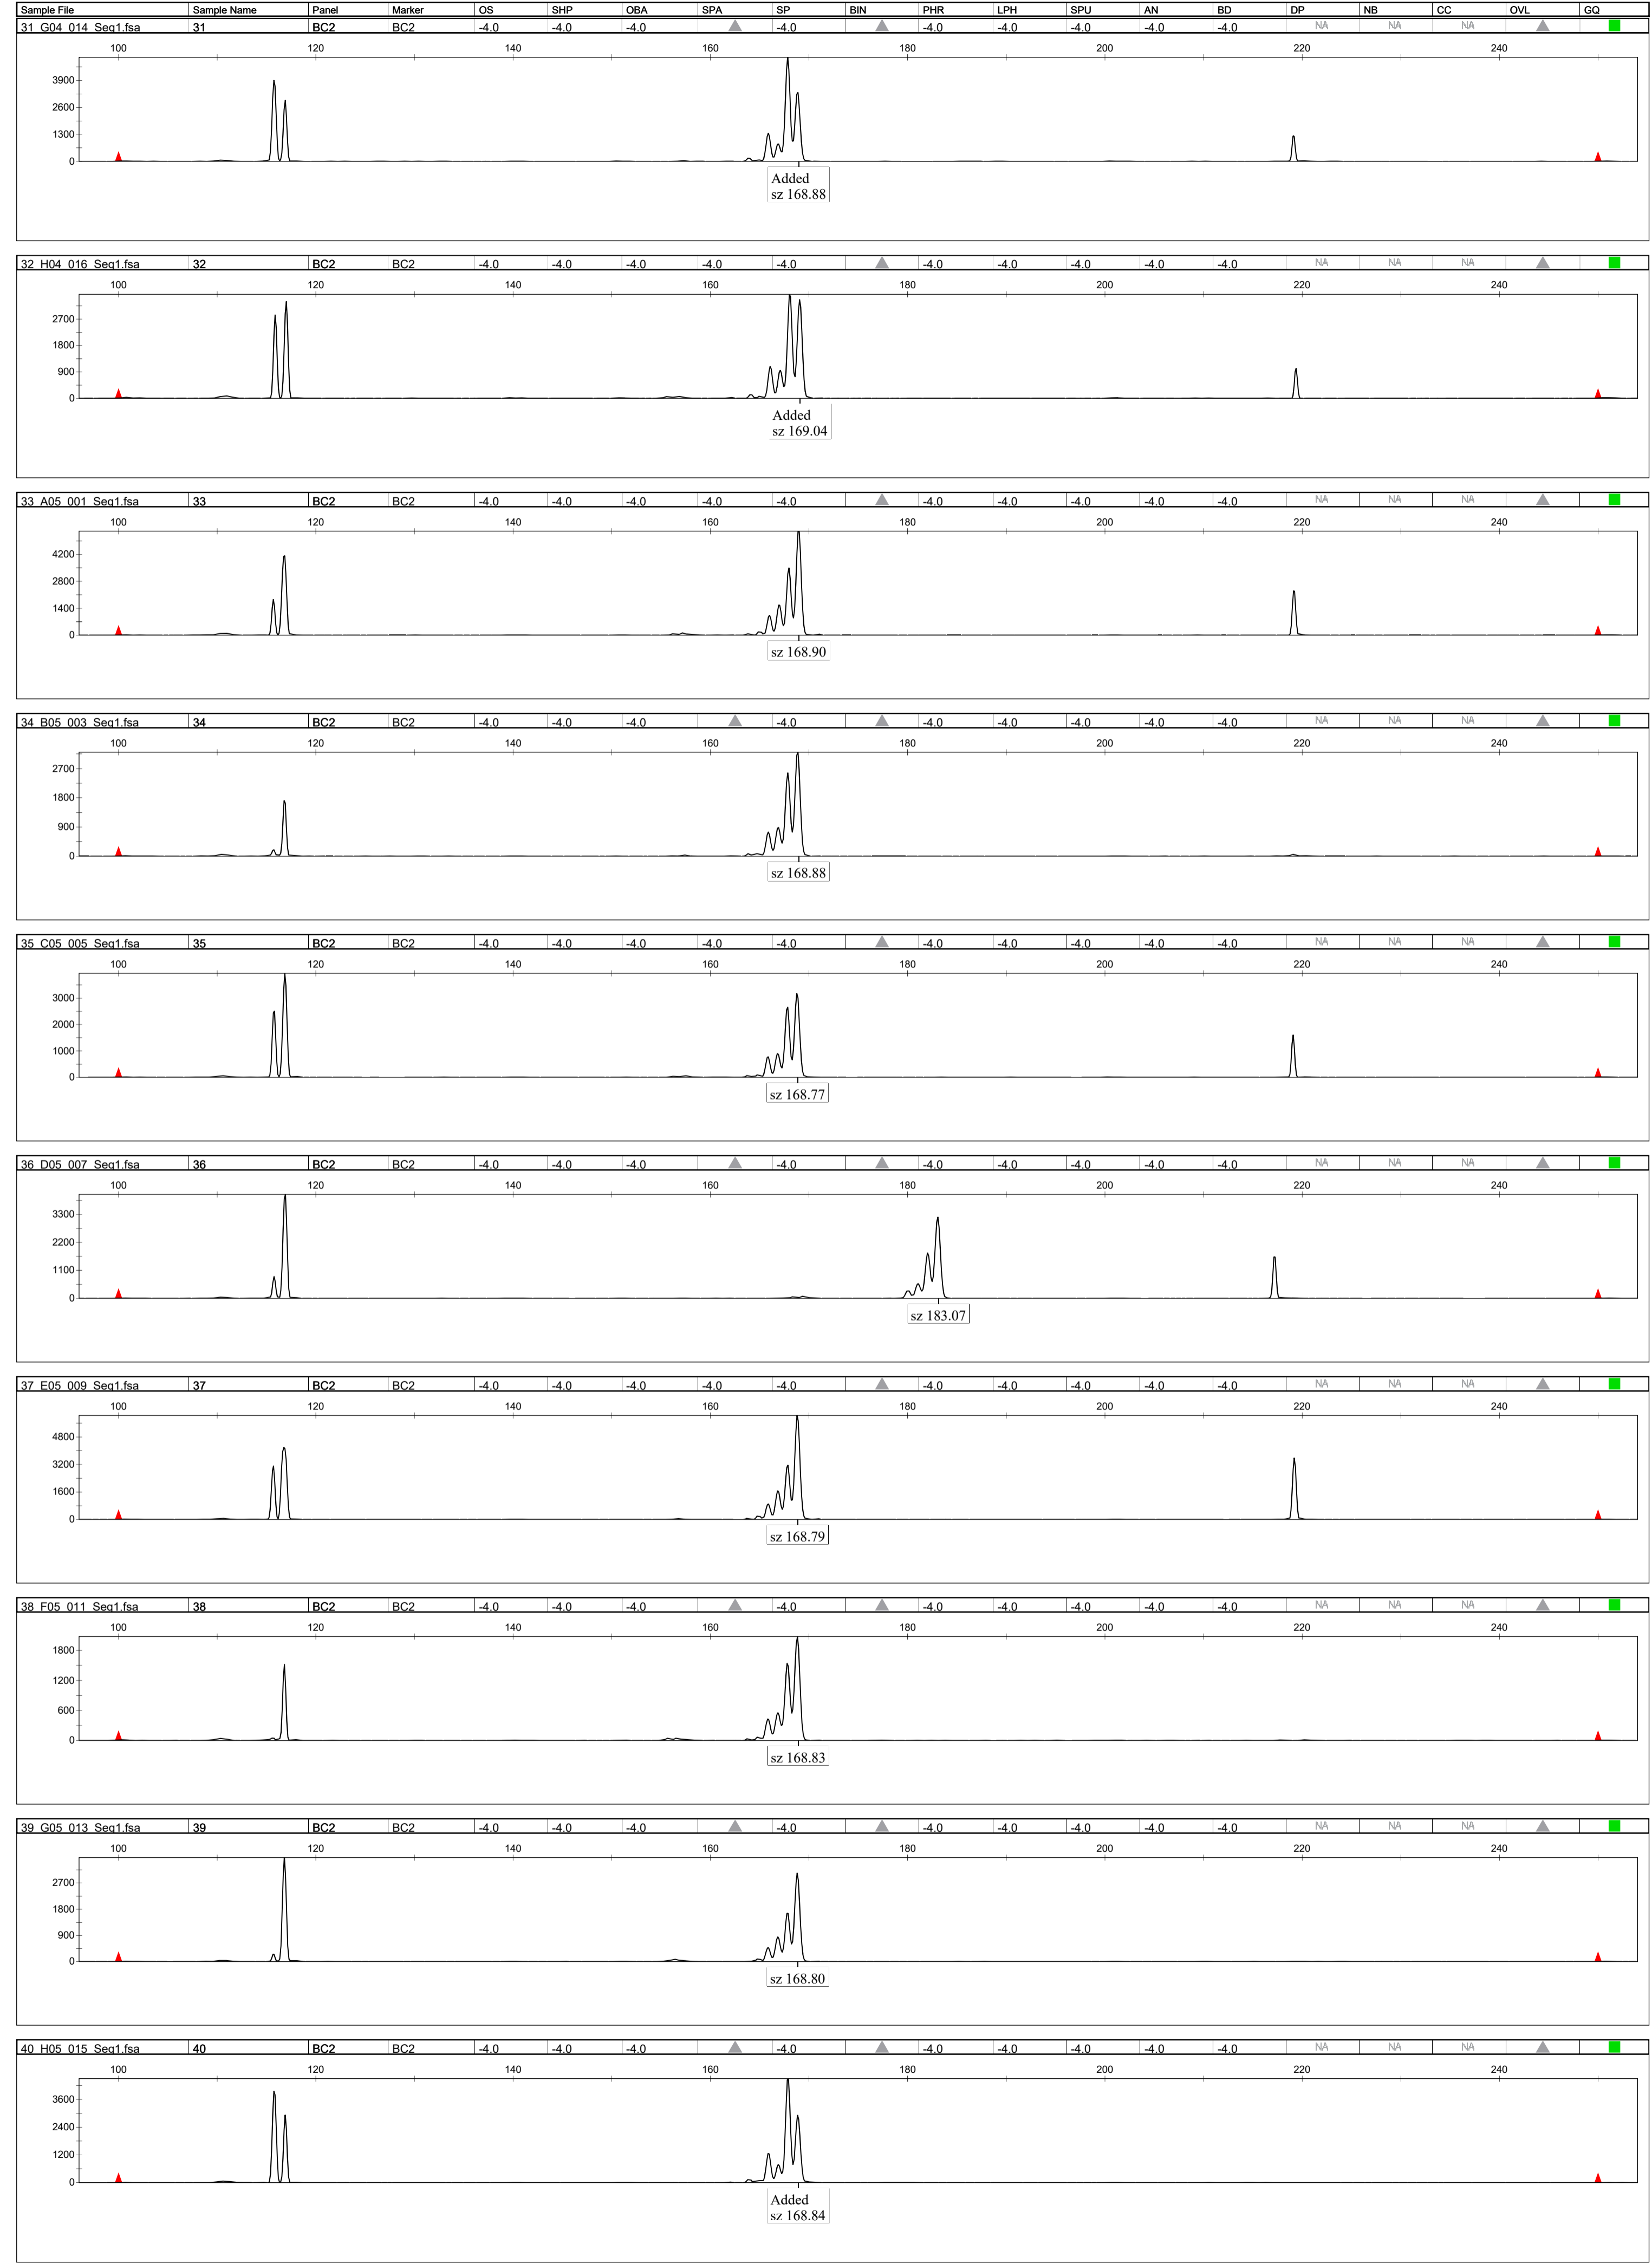

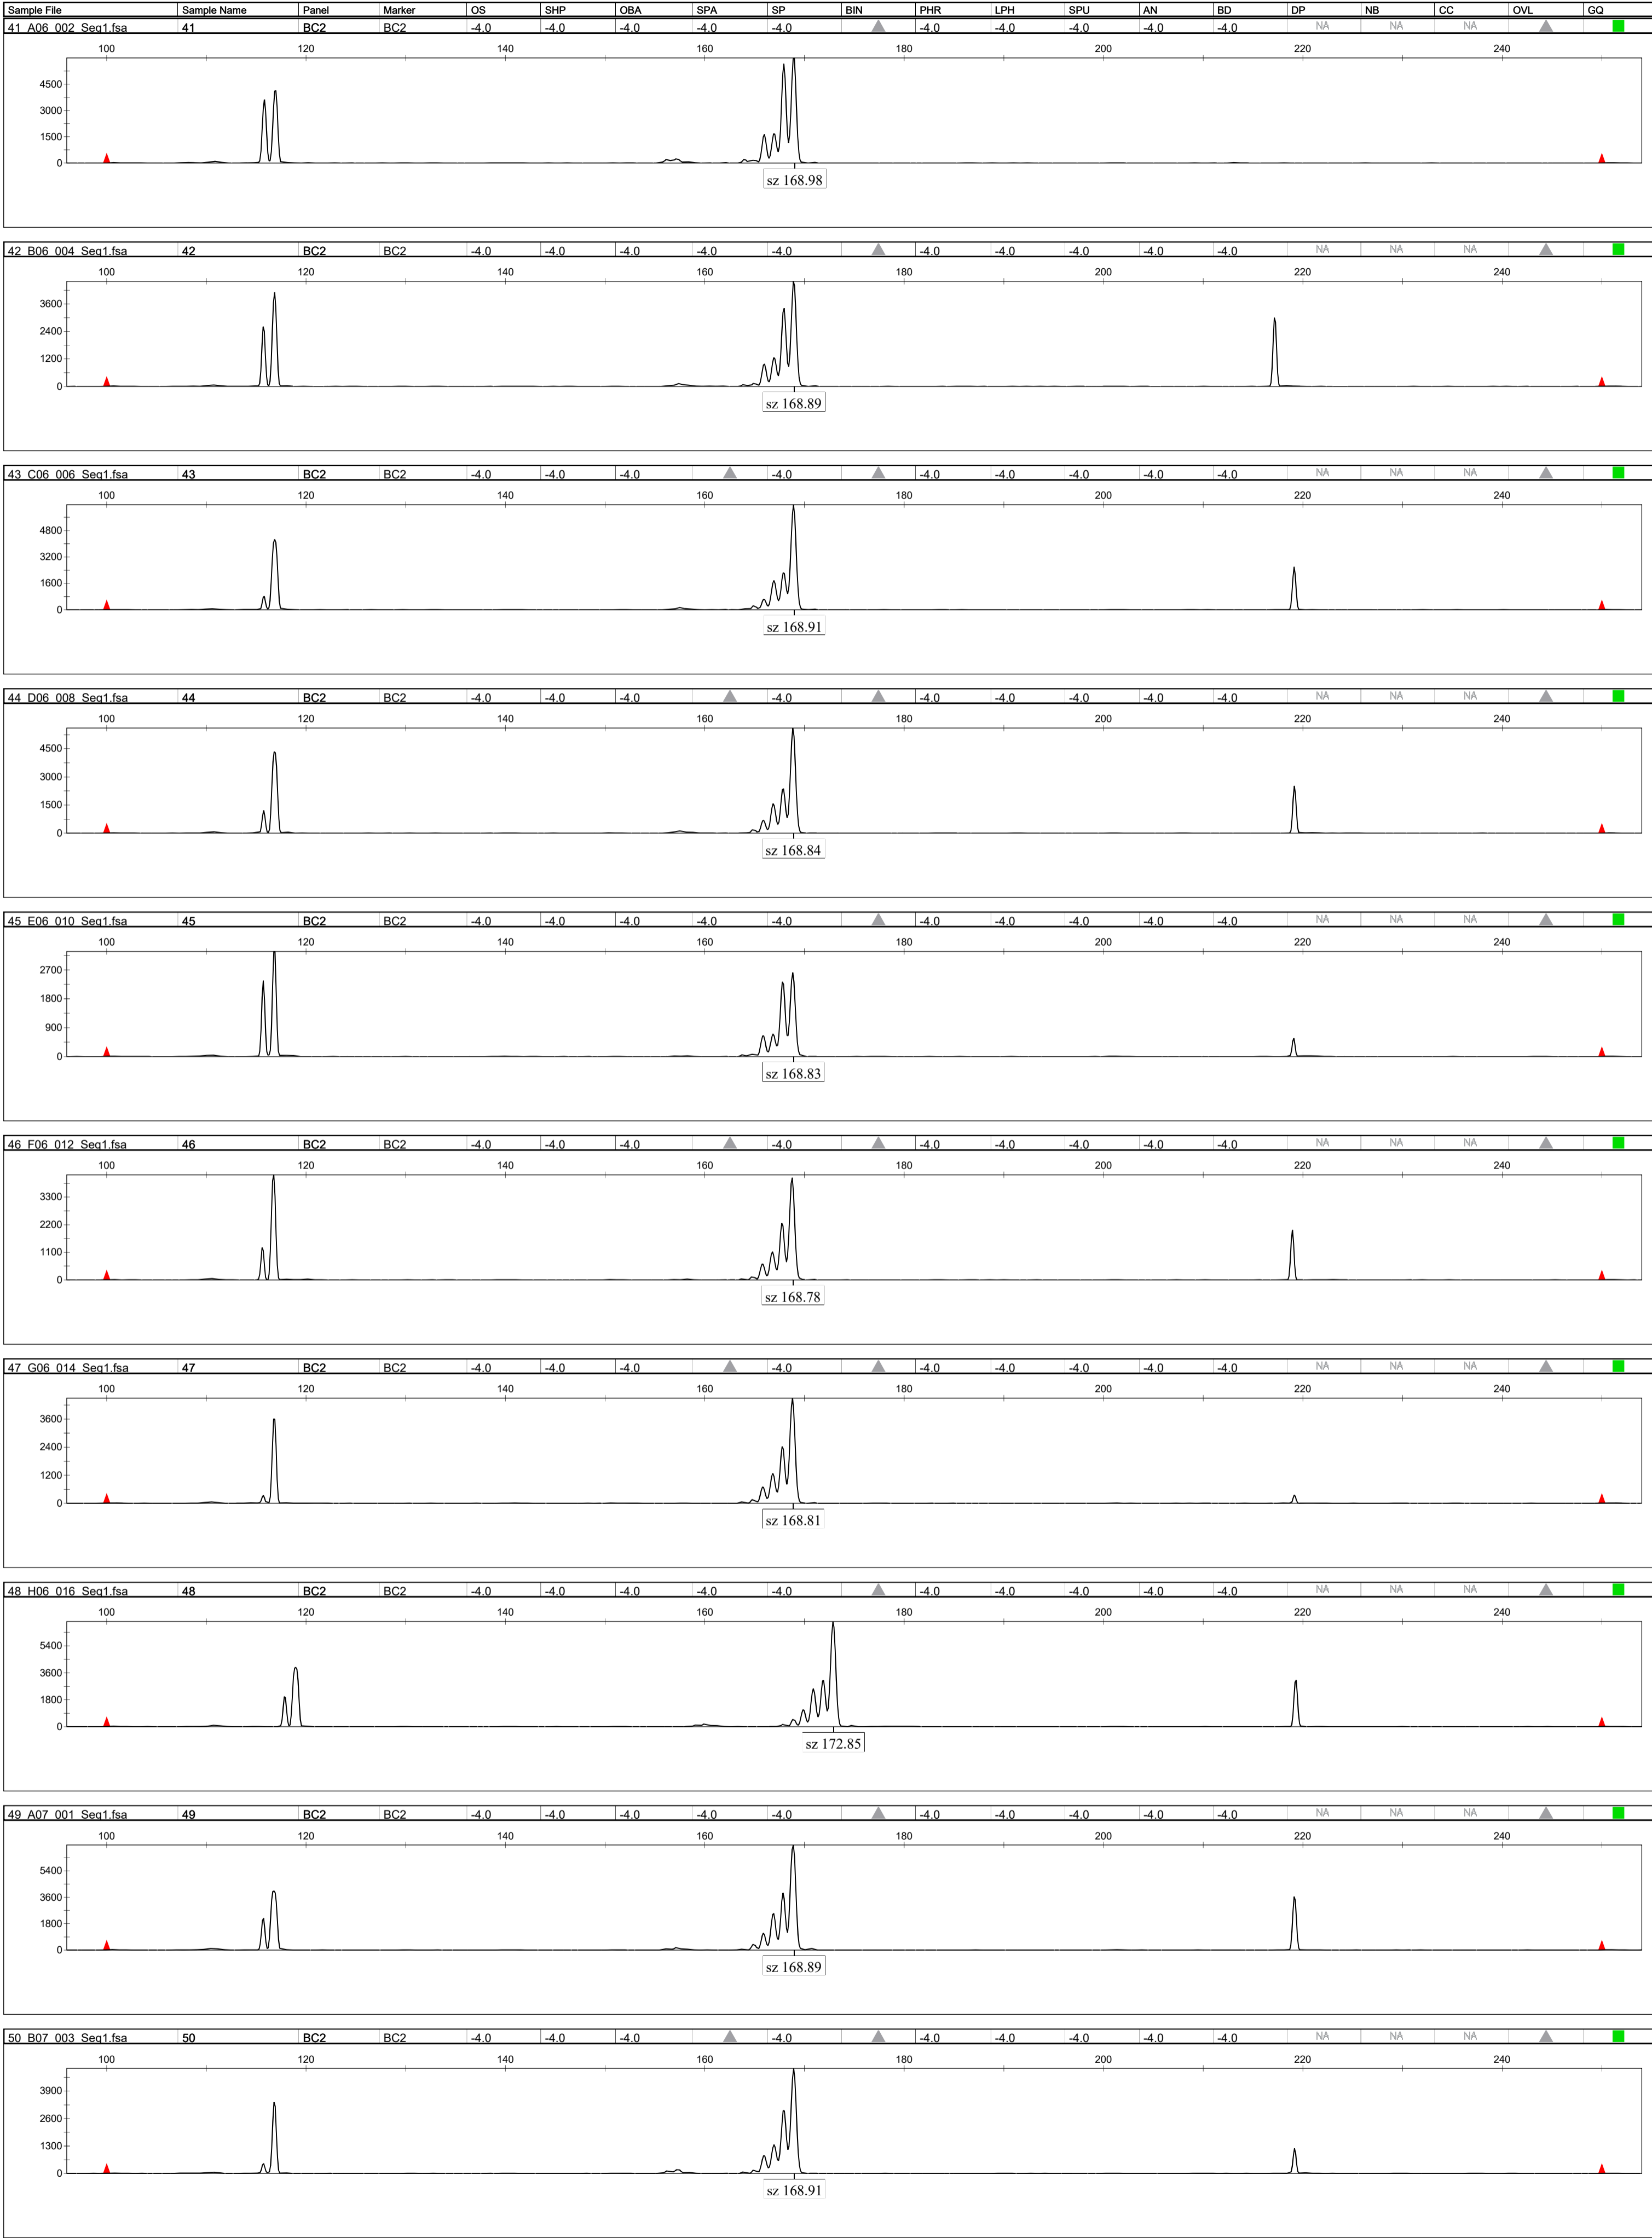

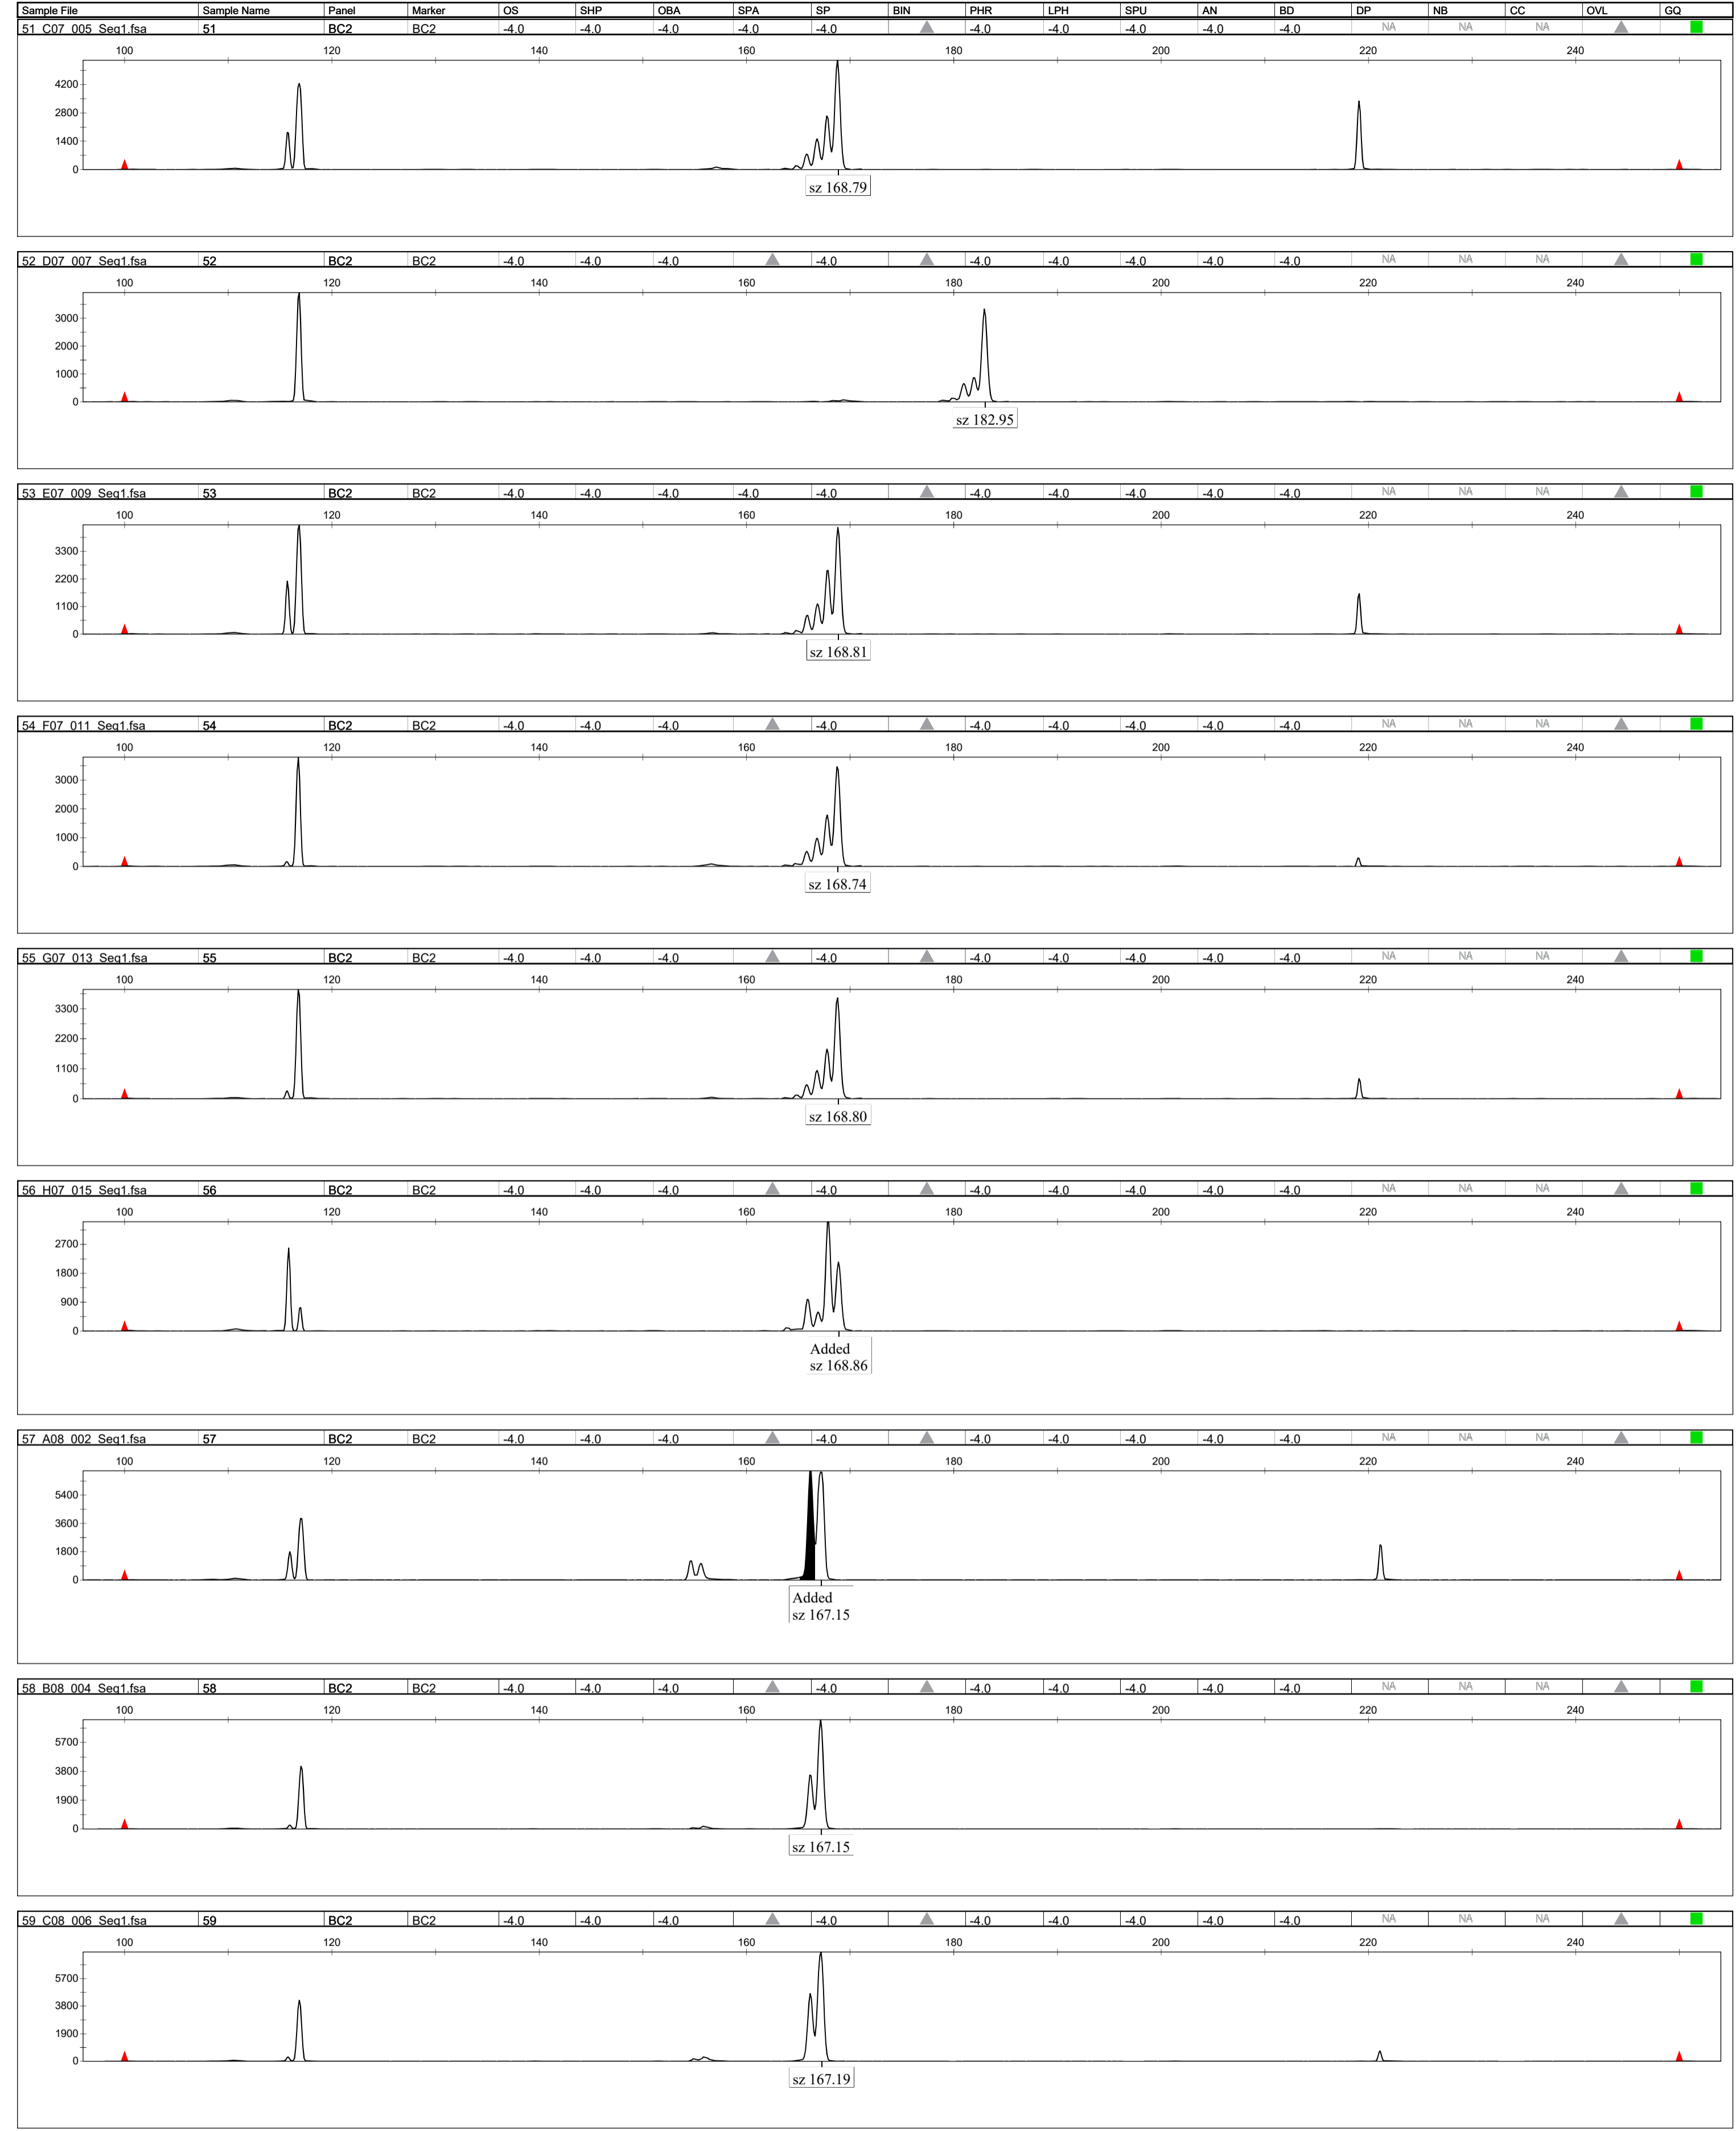

Supplement: s1 [file s1 › BC2.pdf]

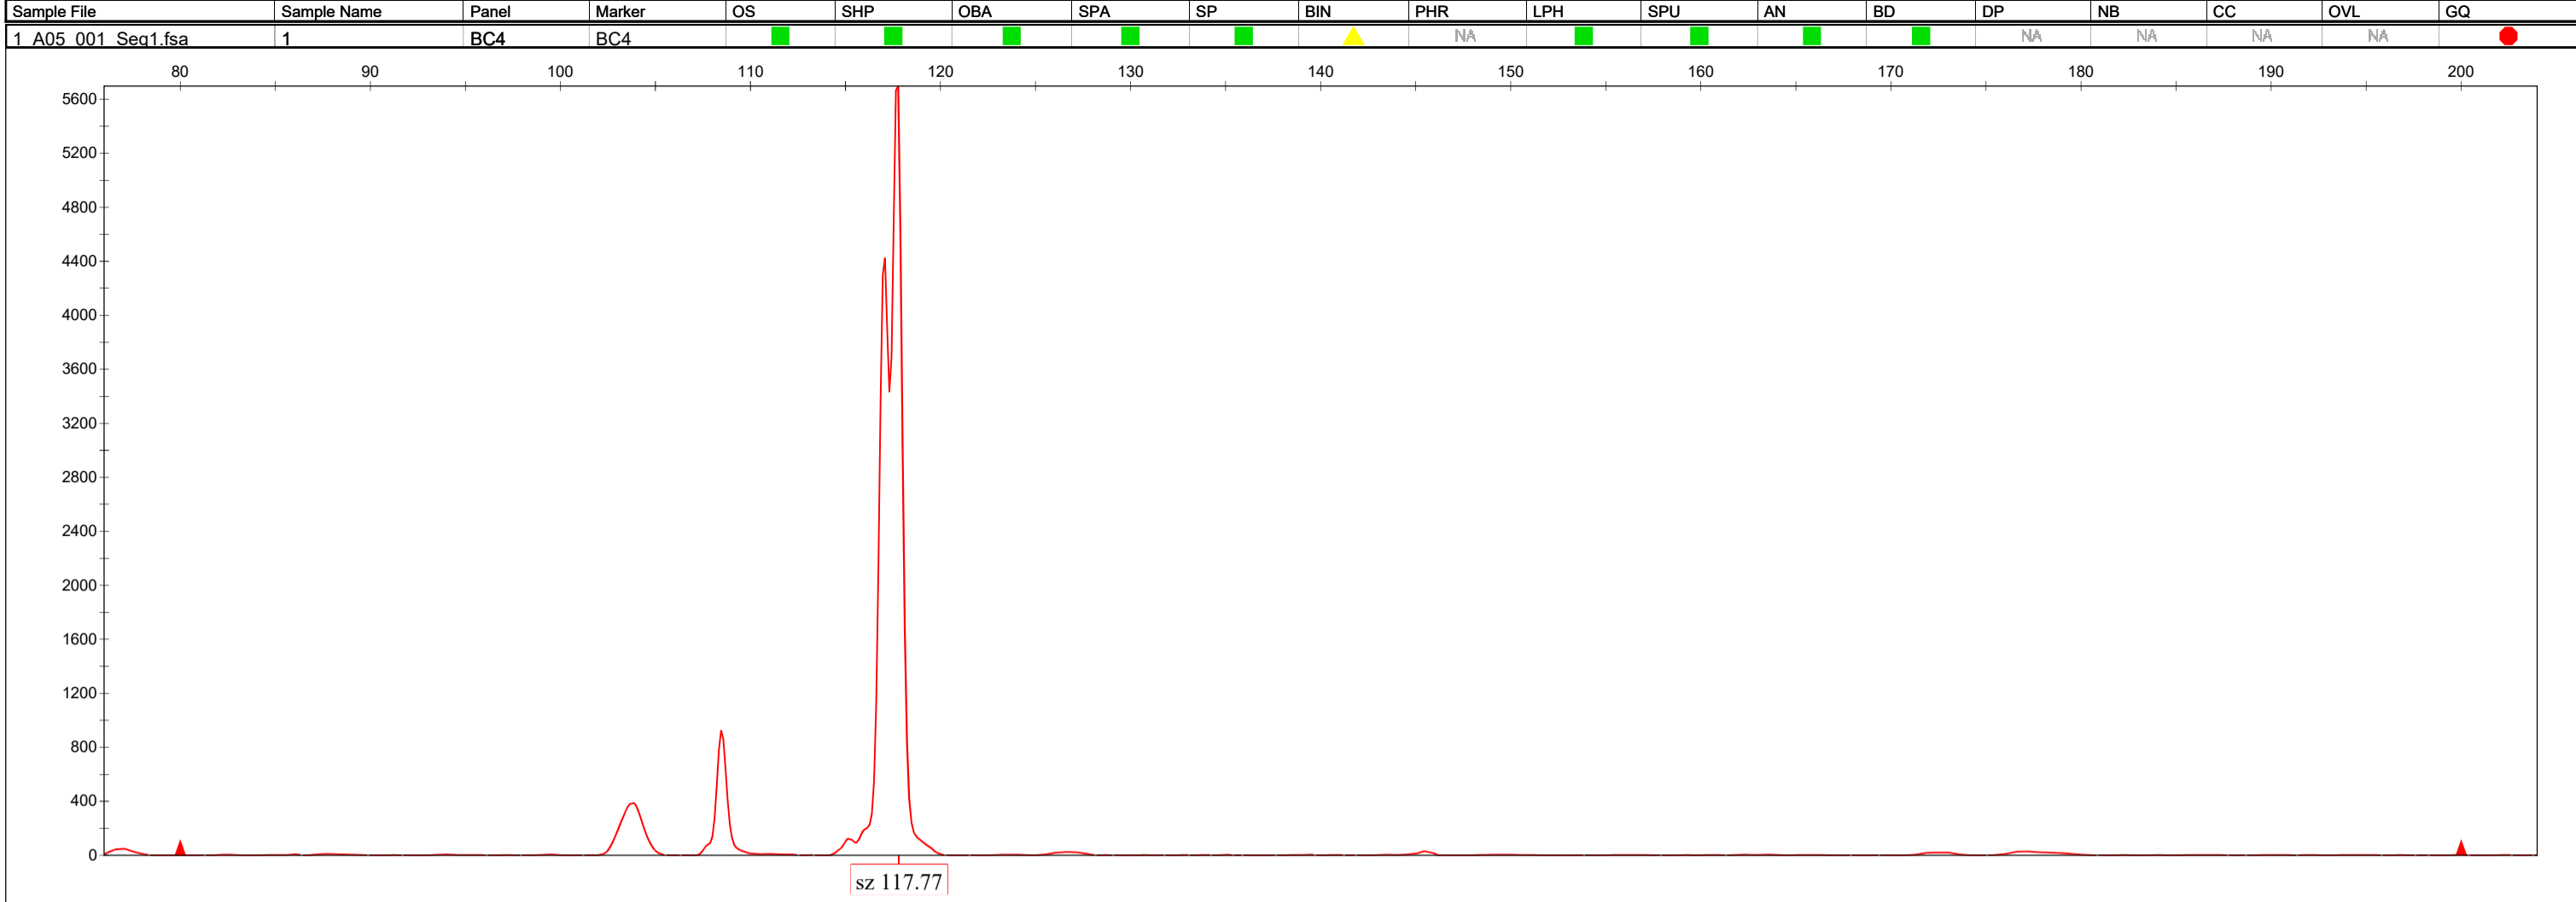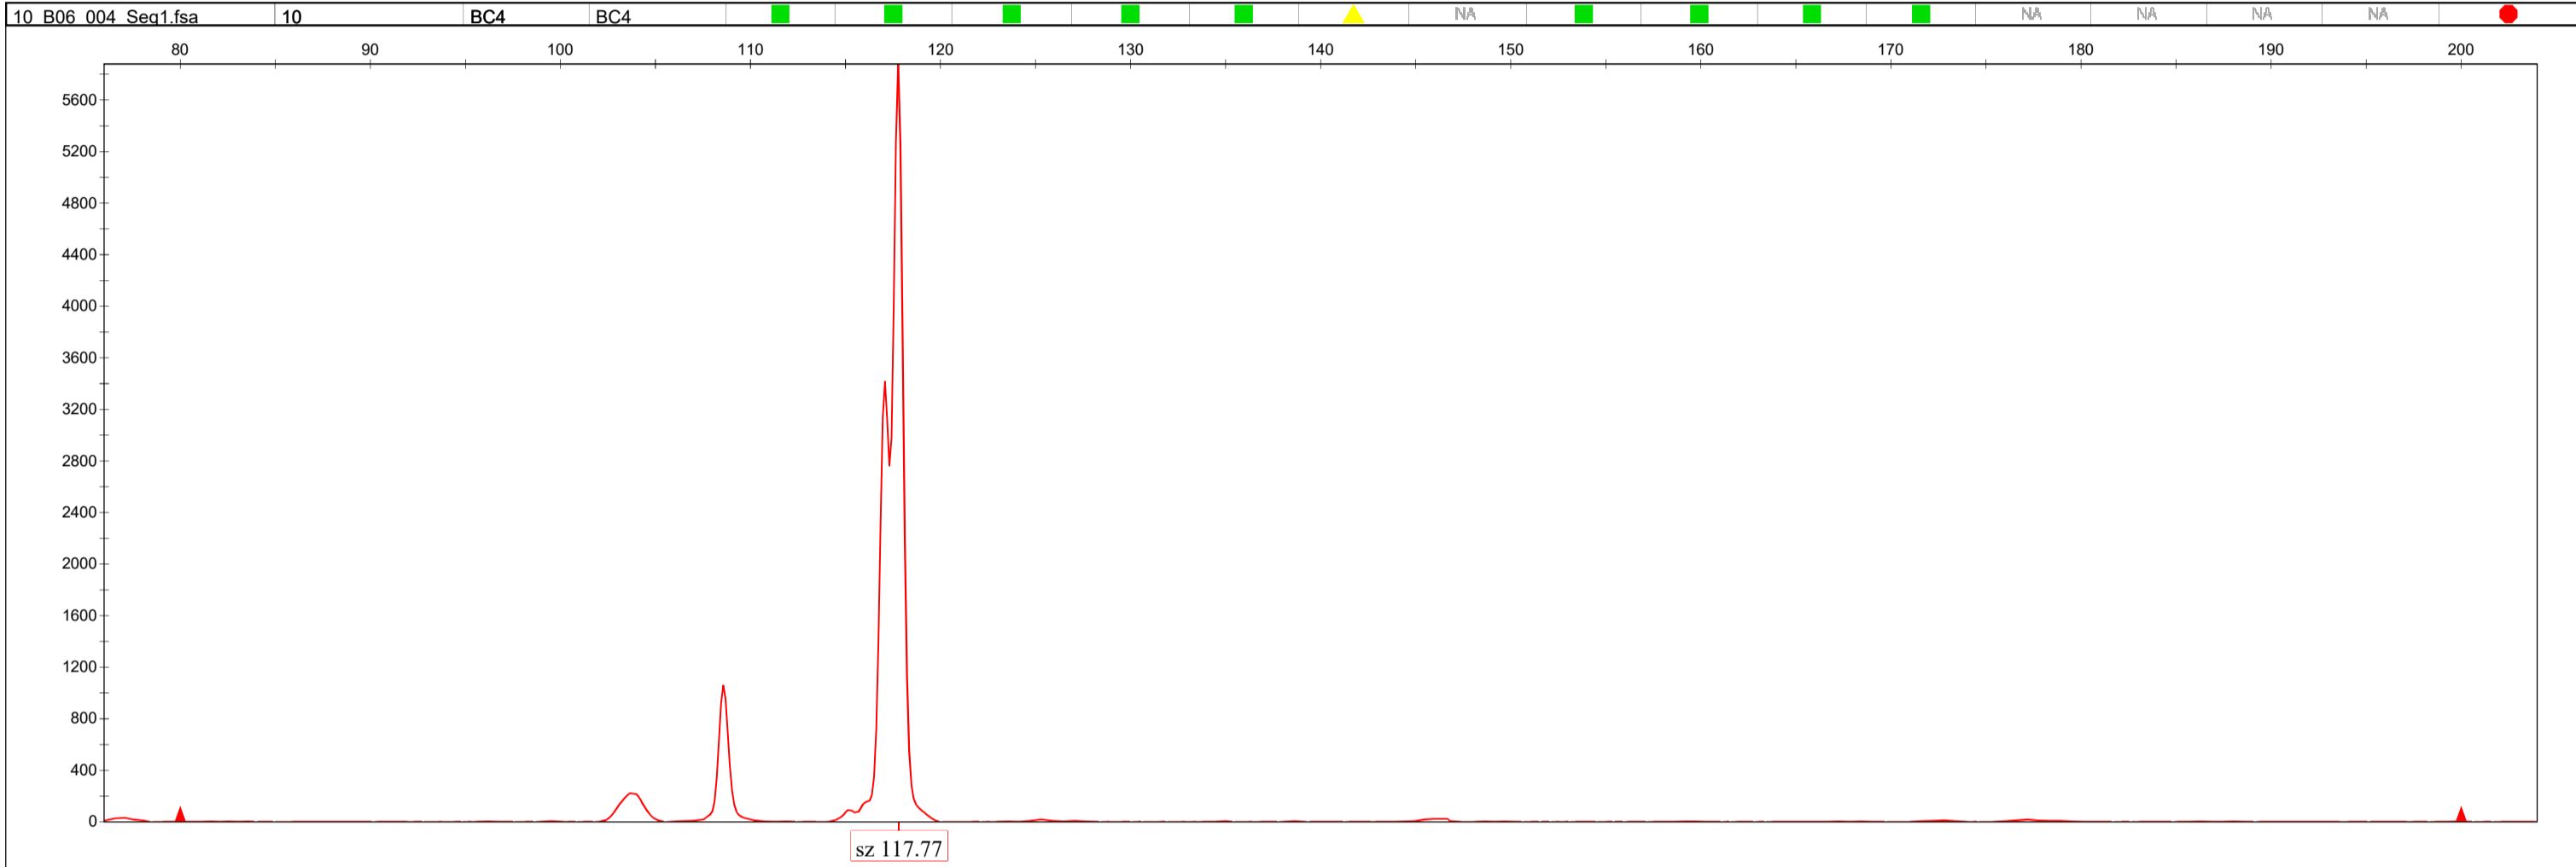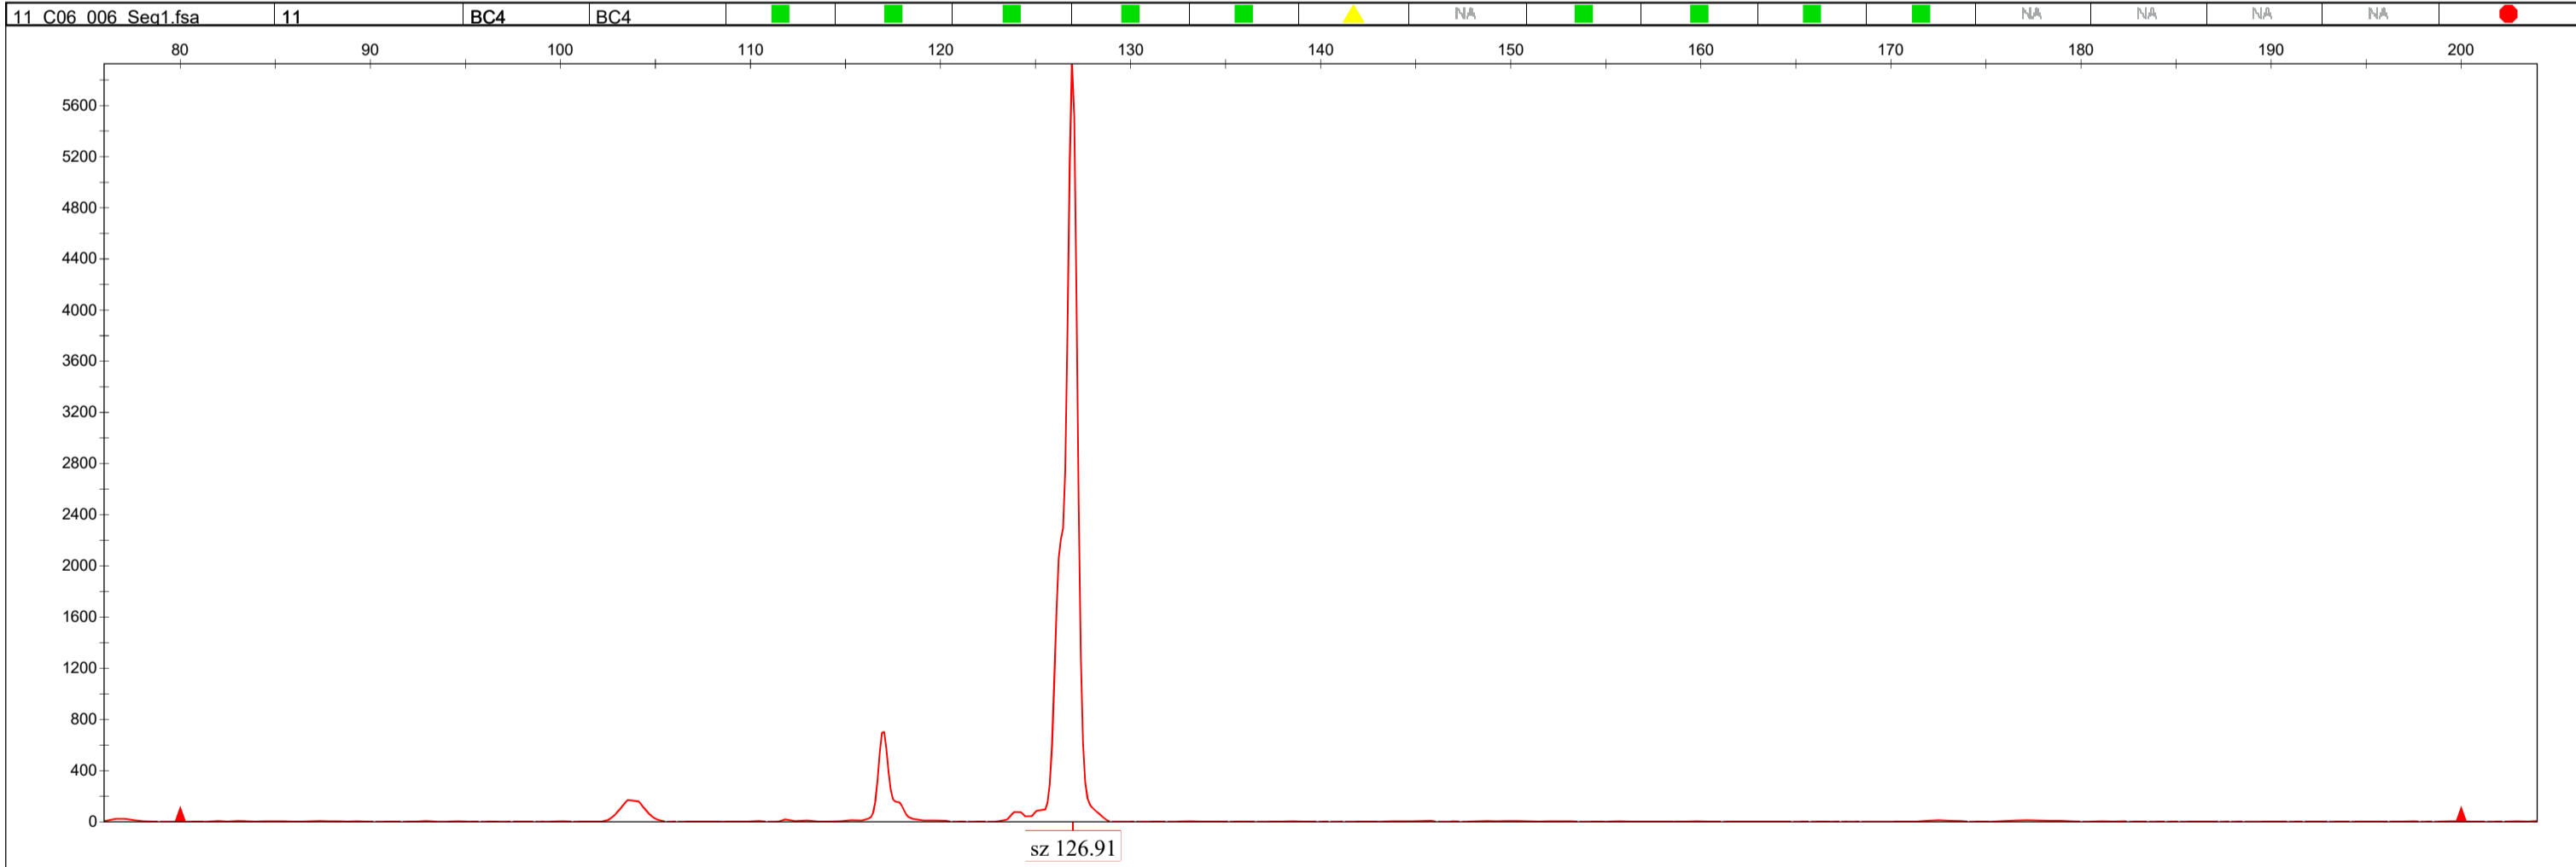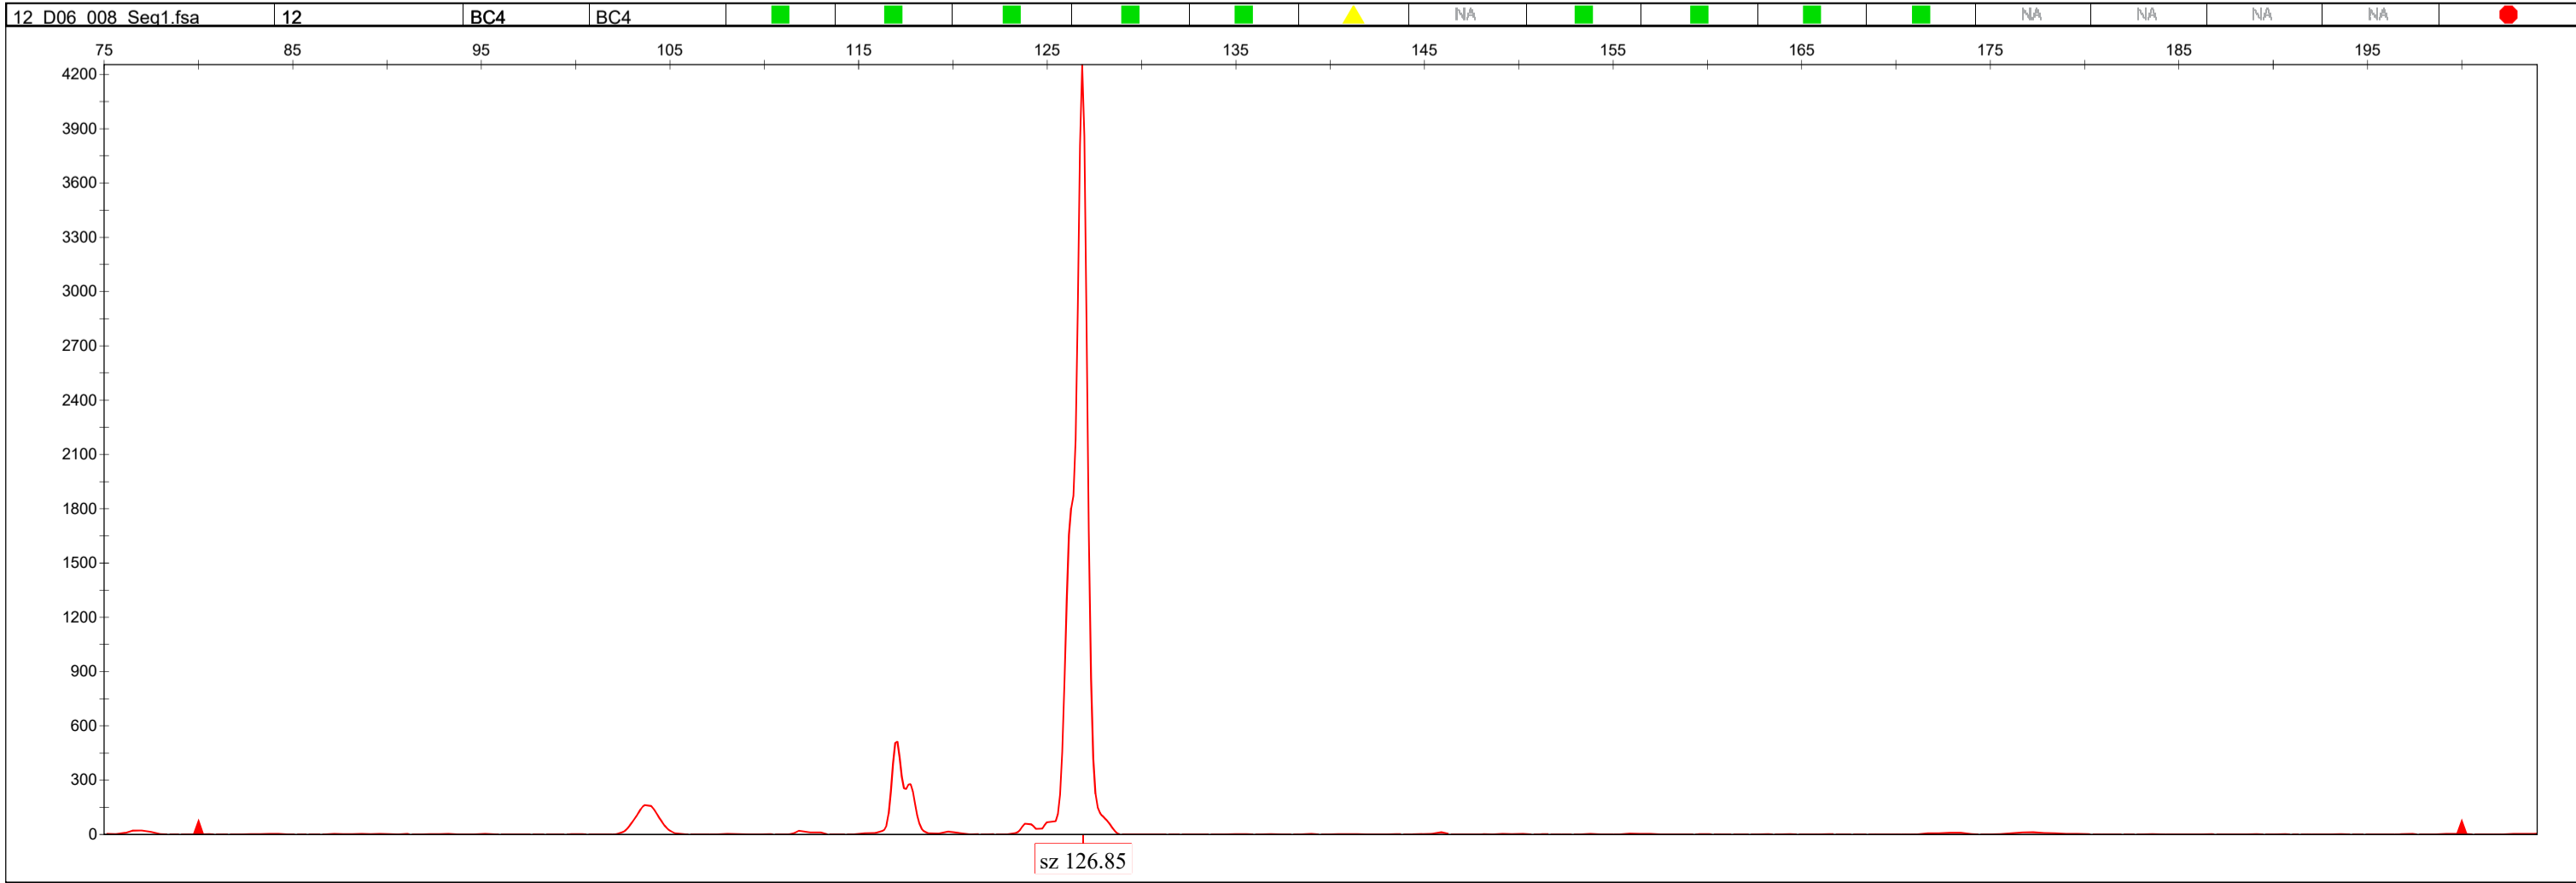

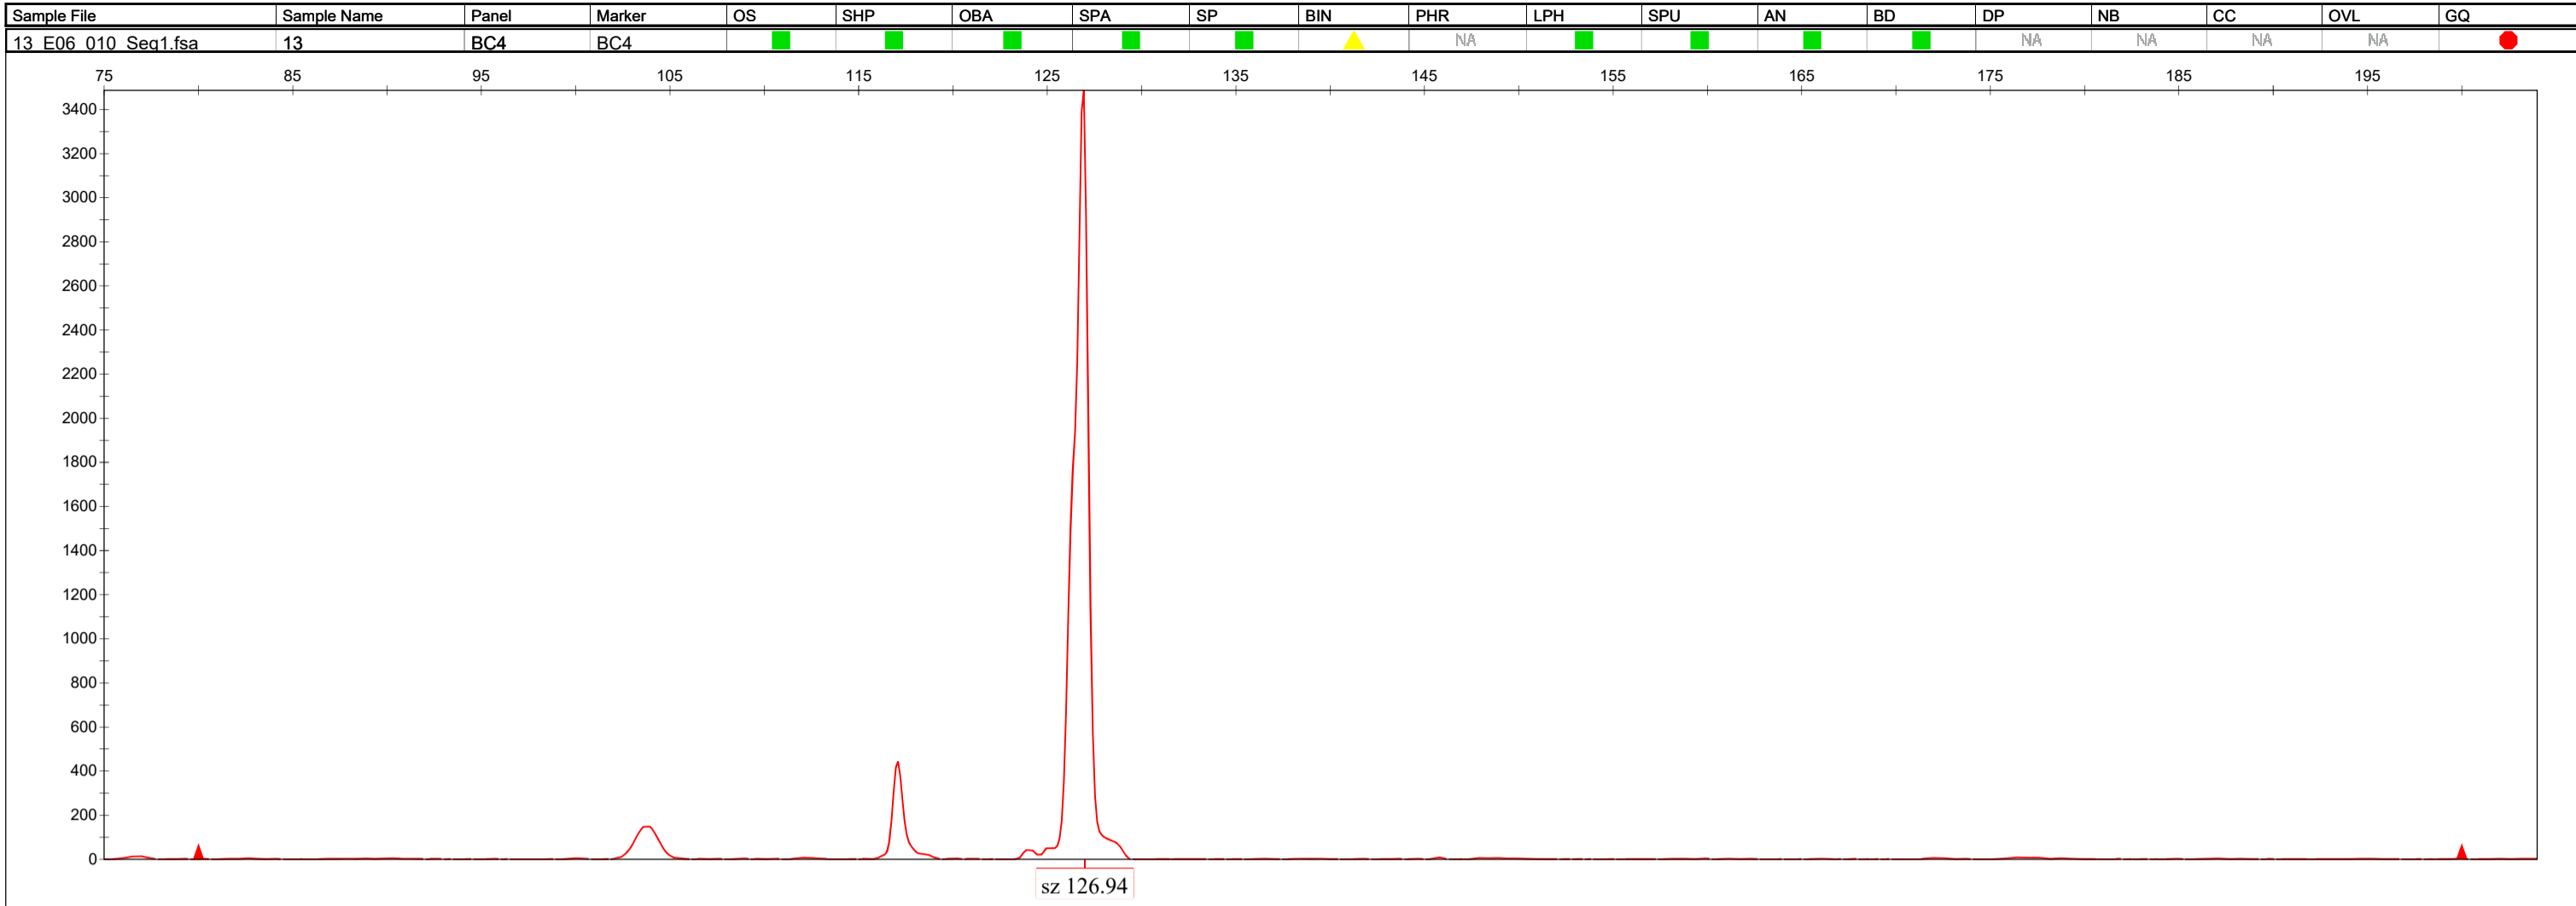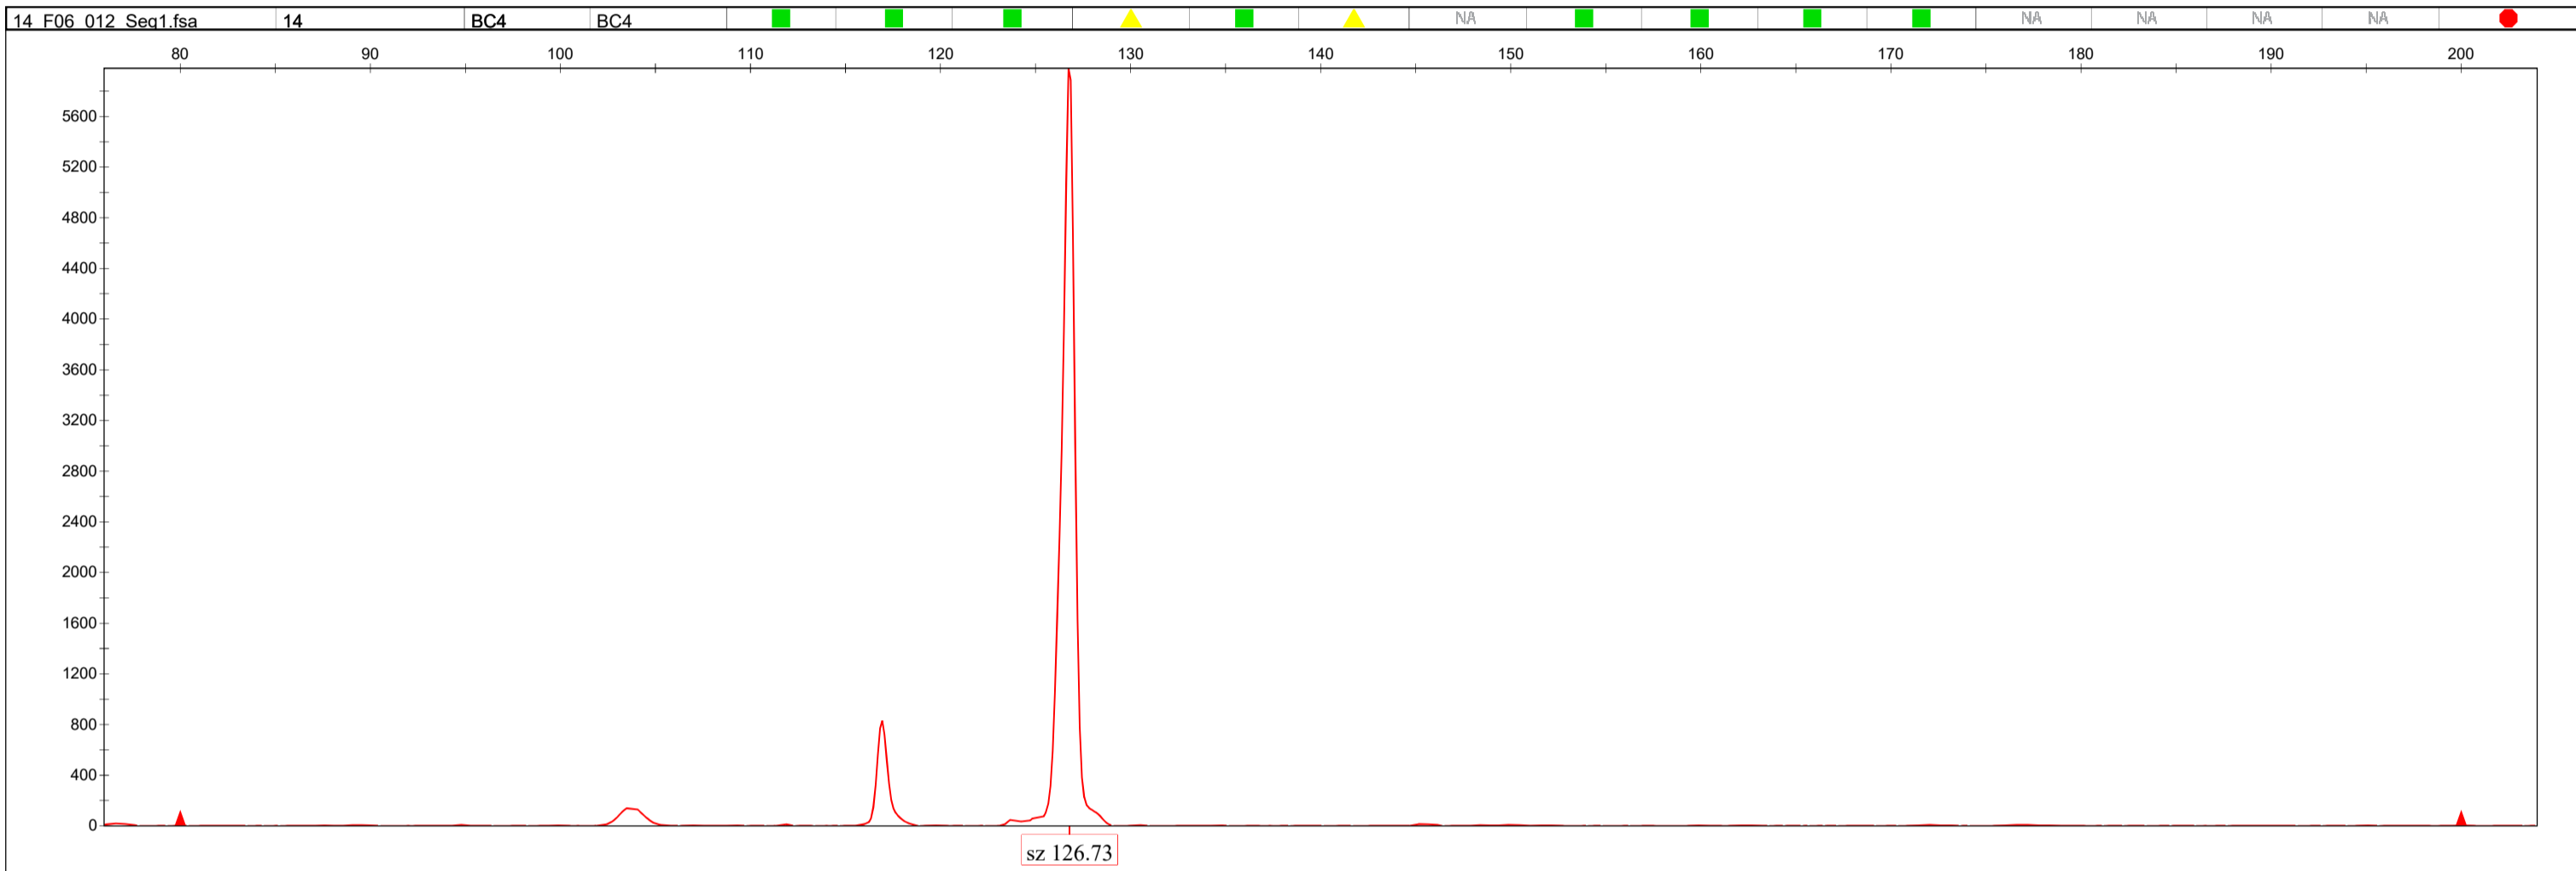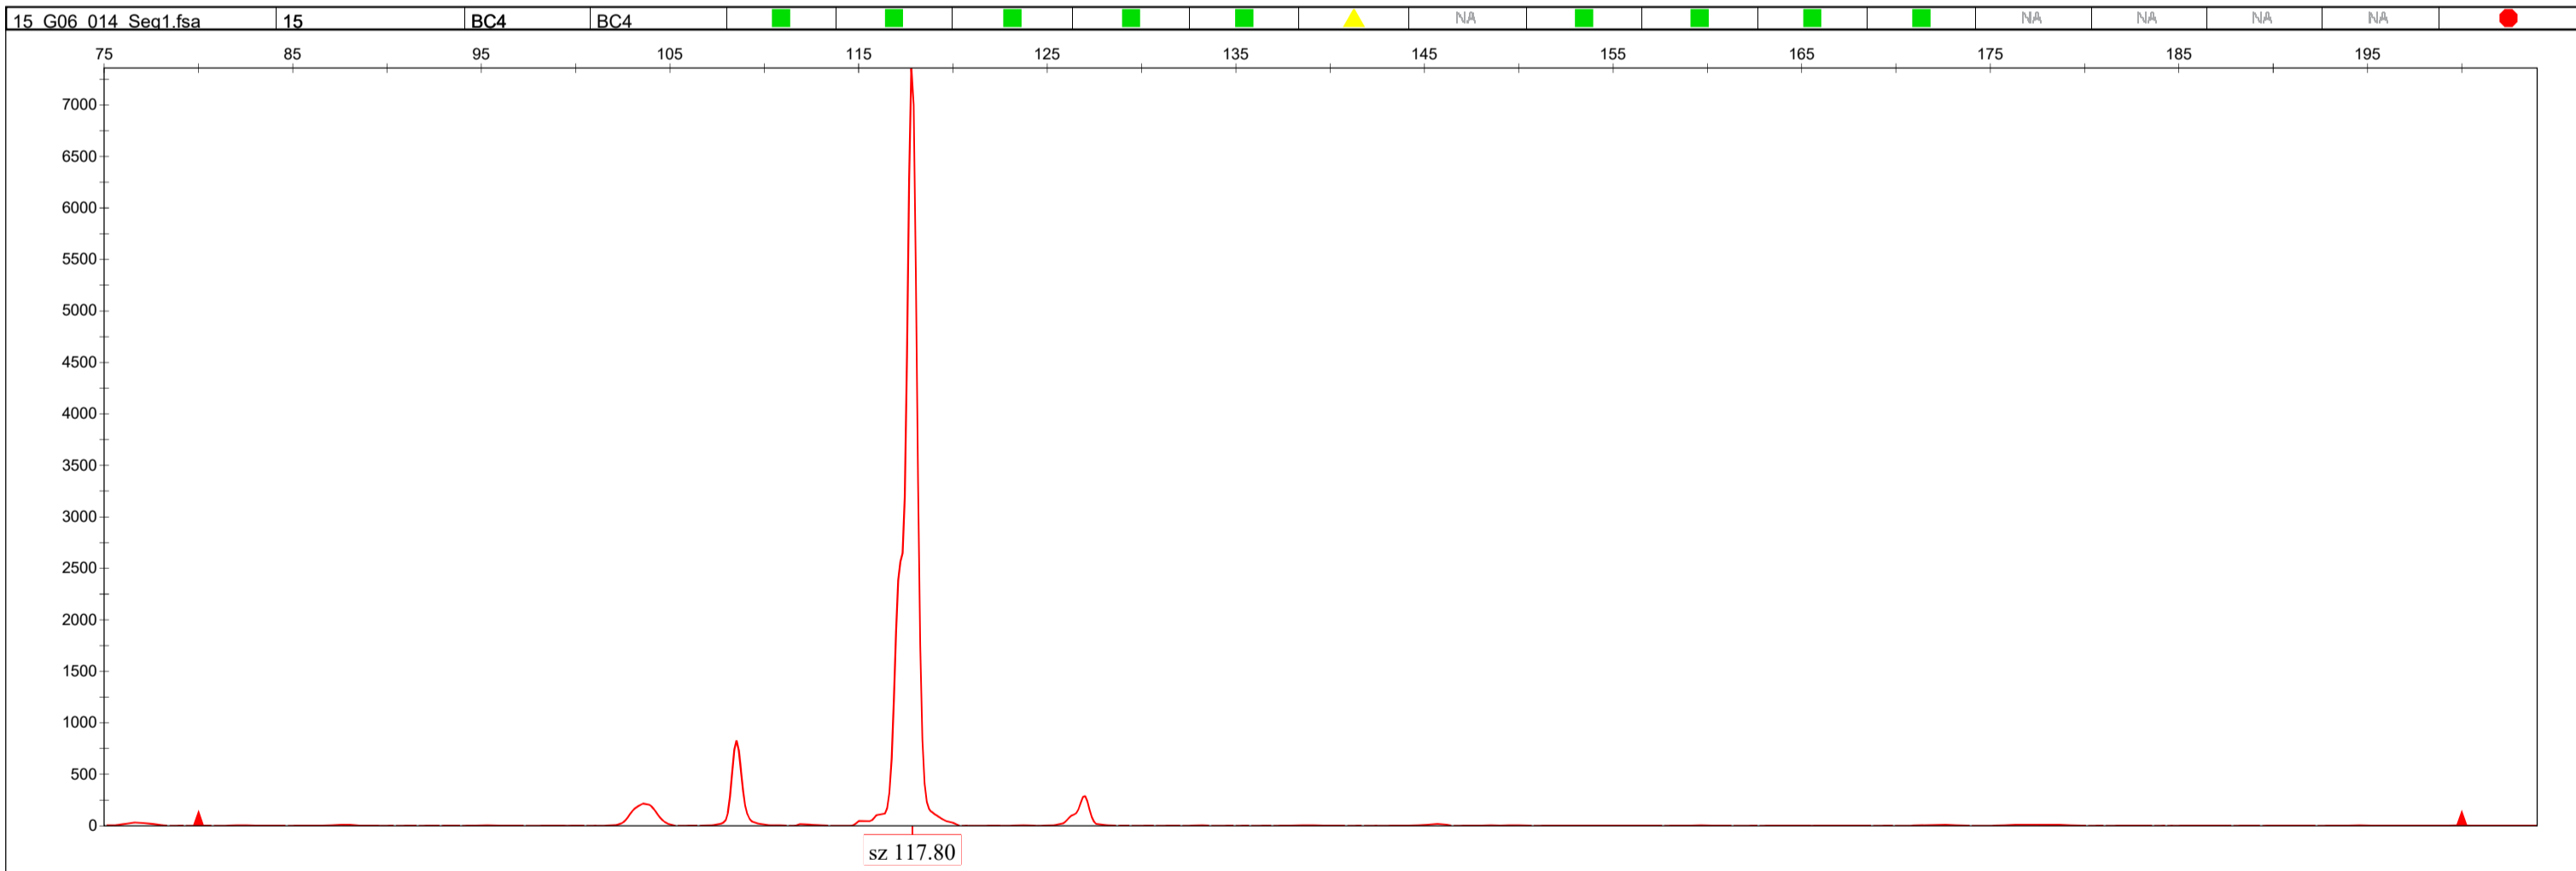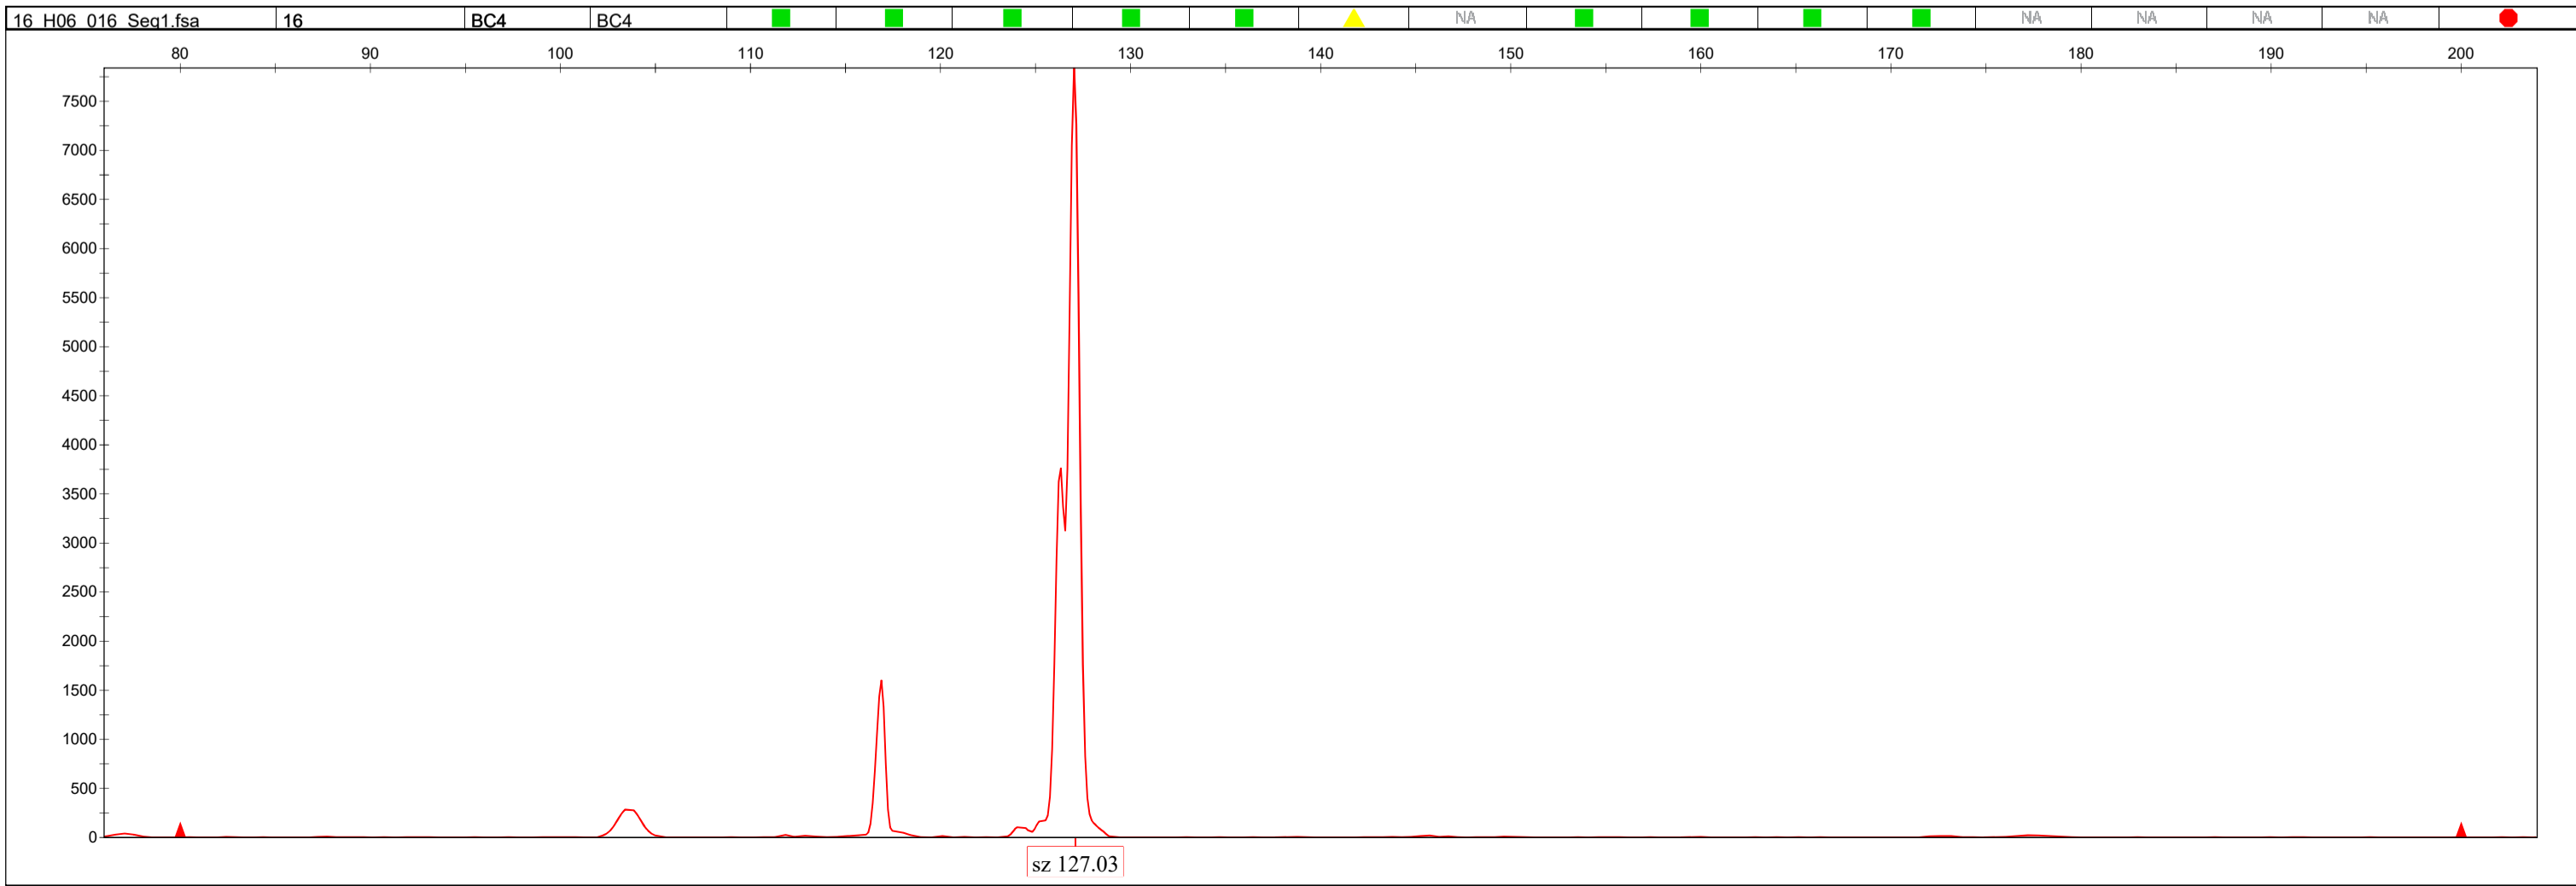

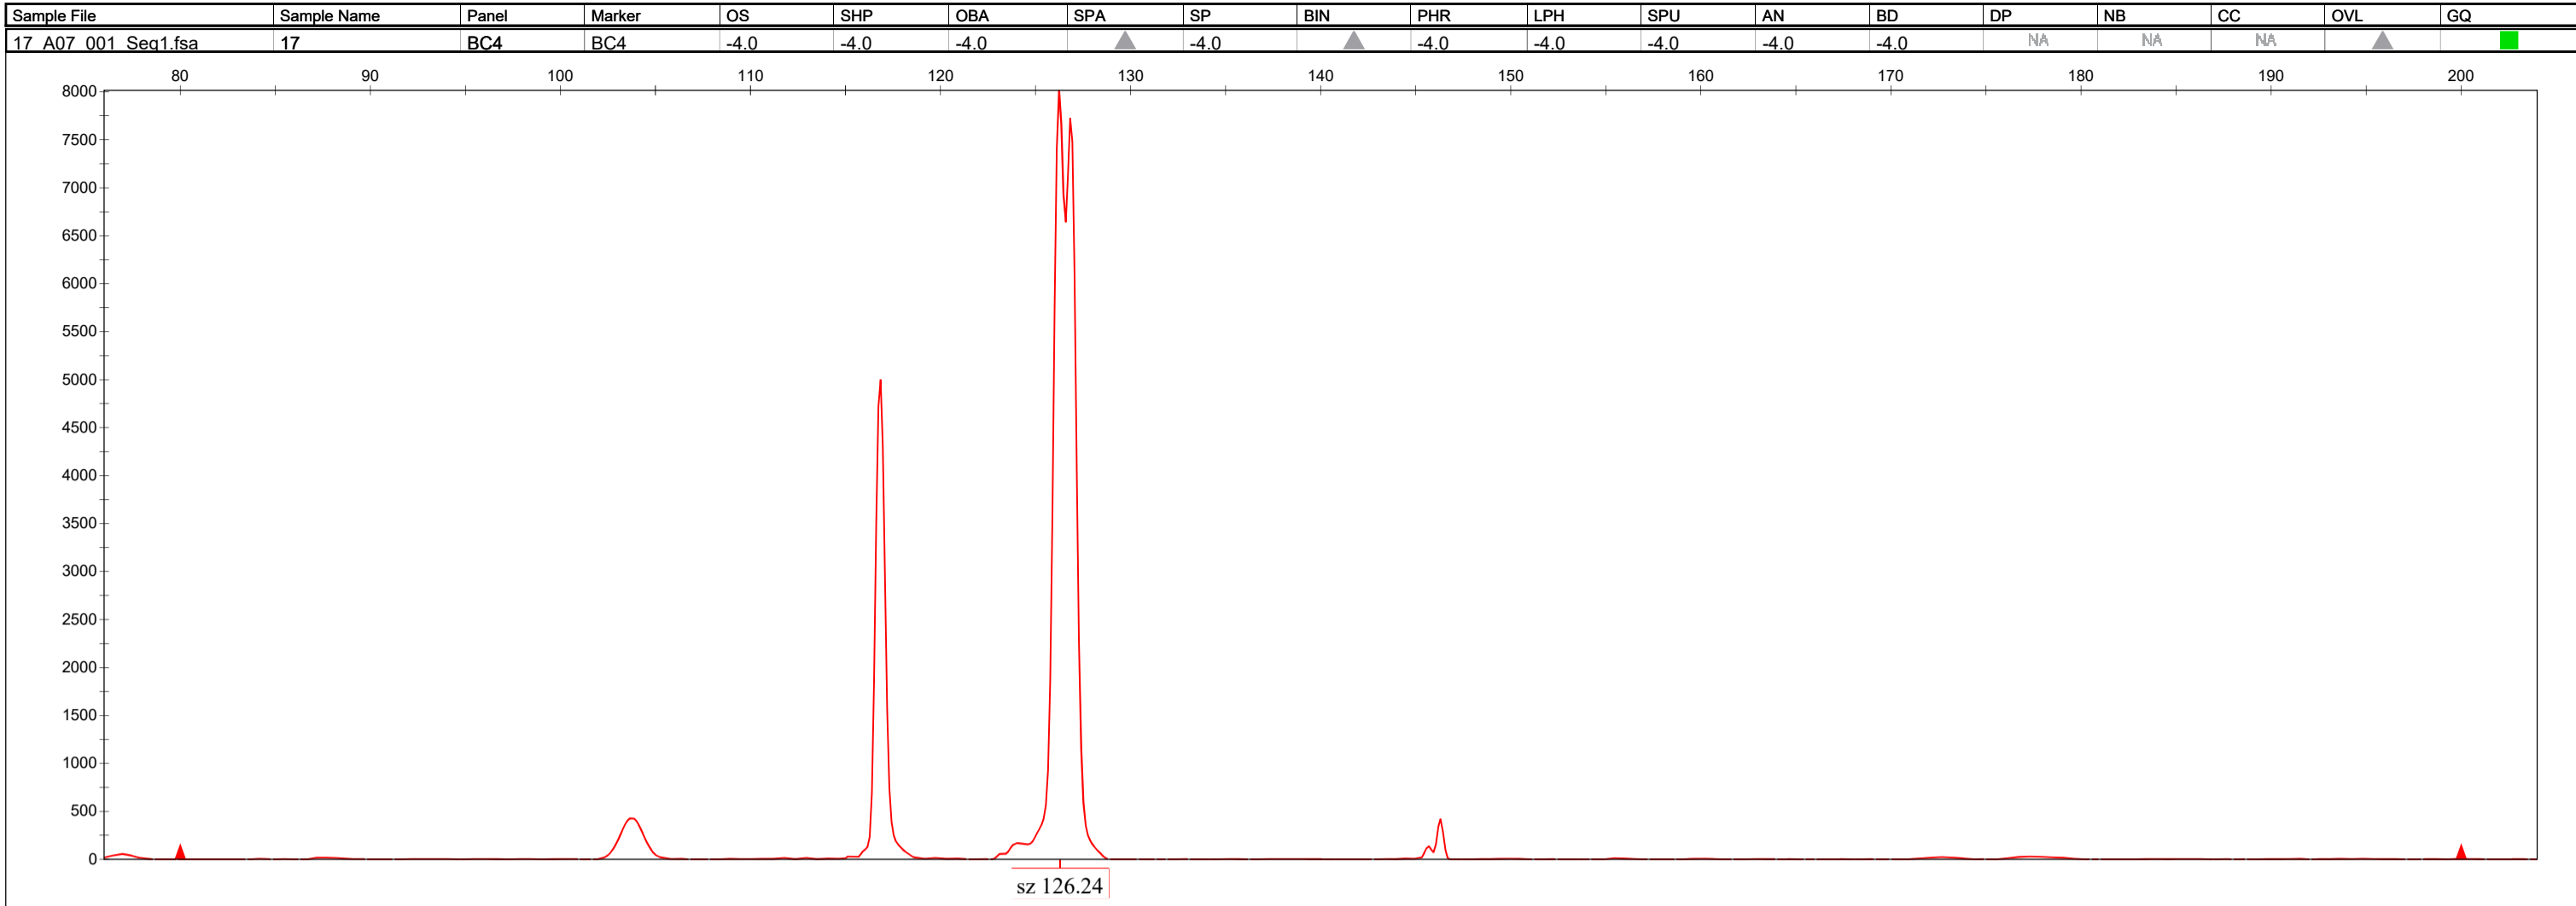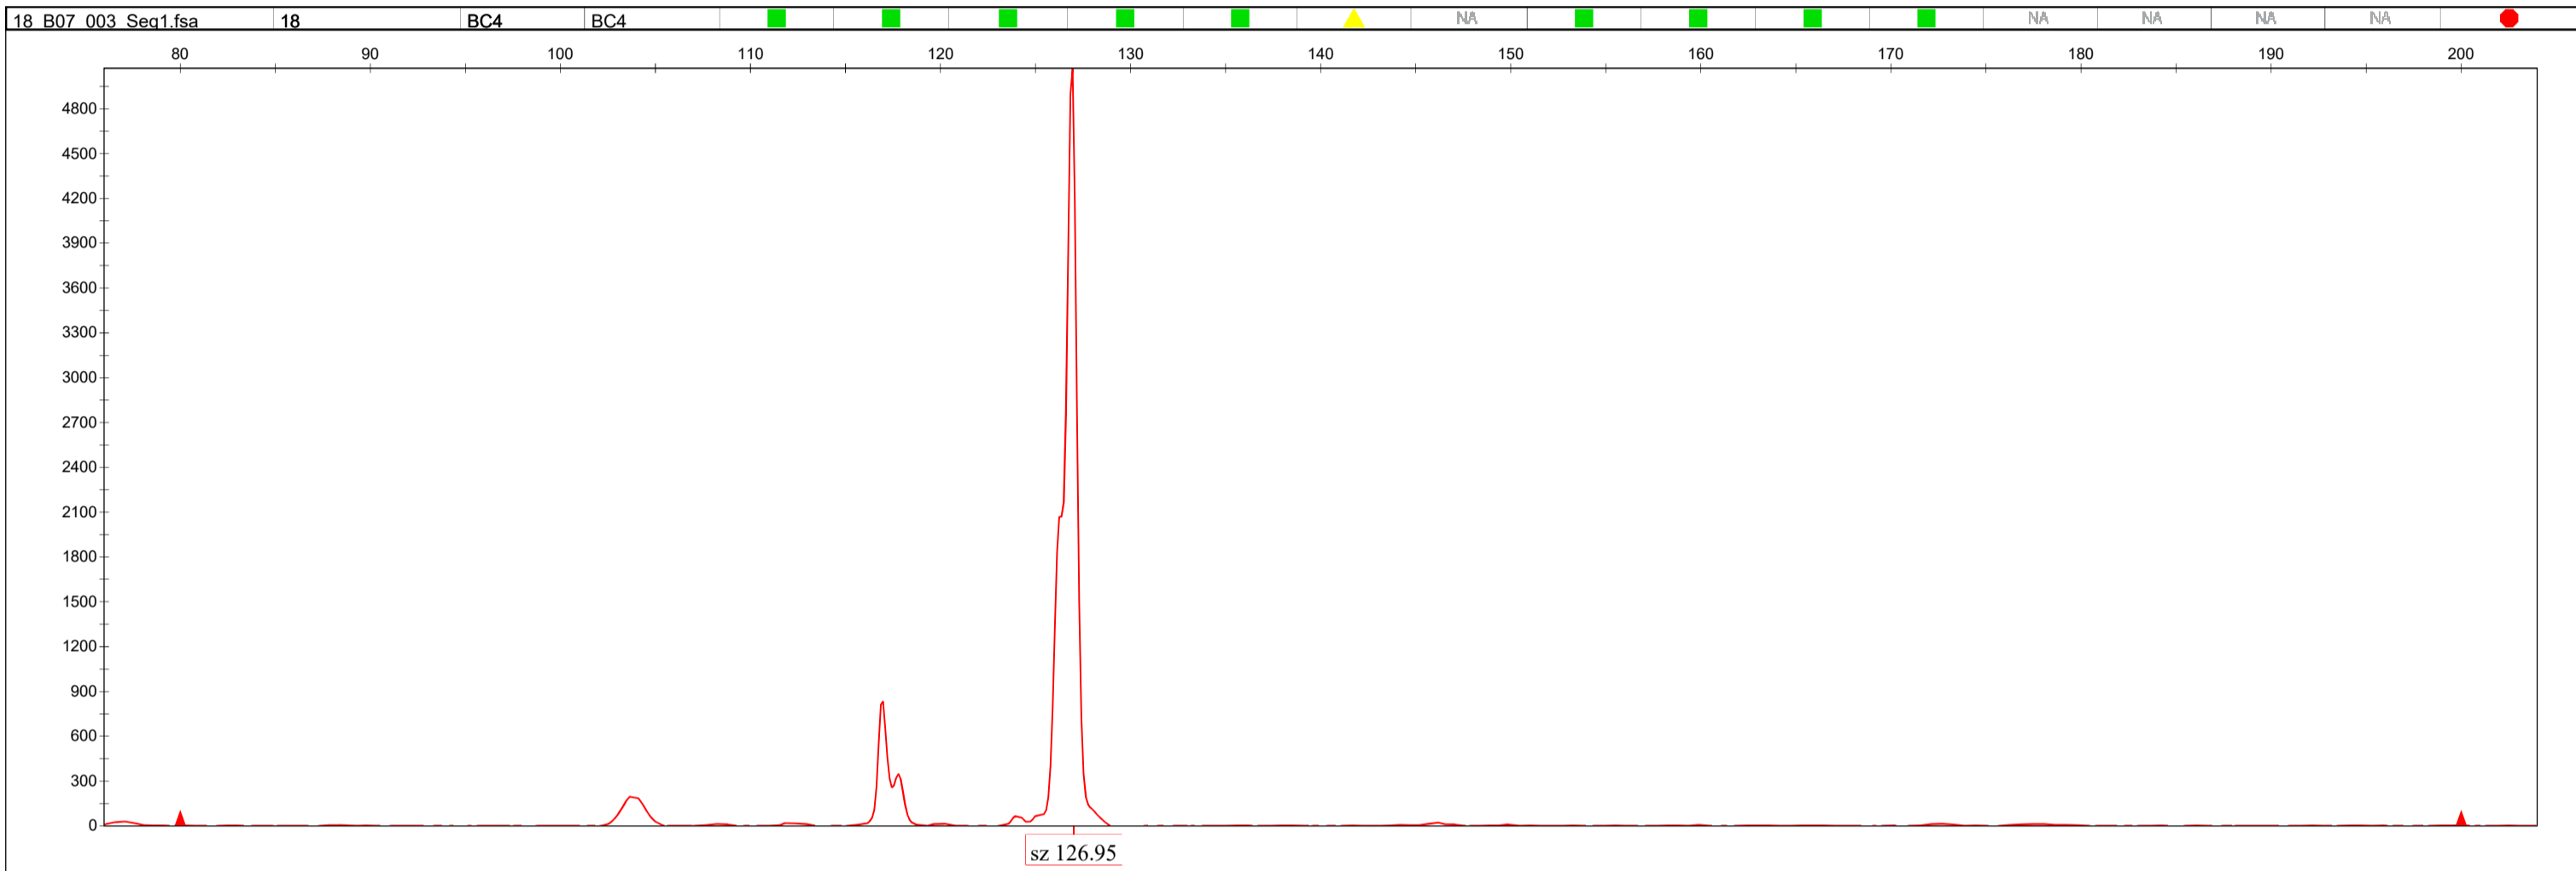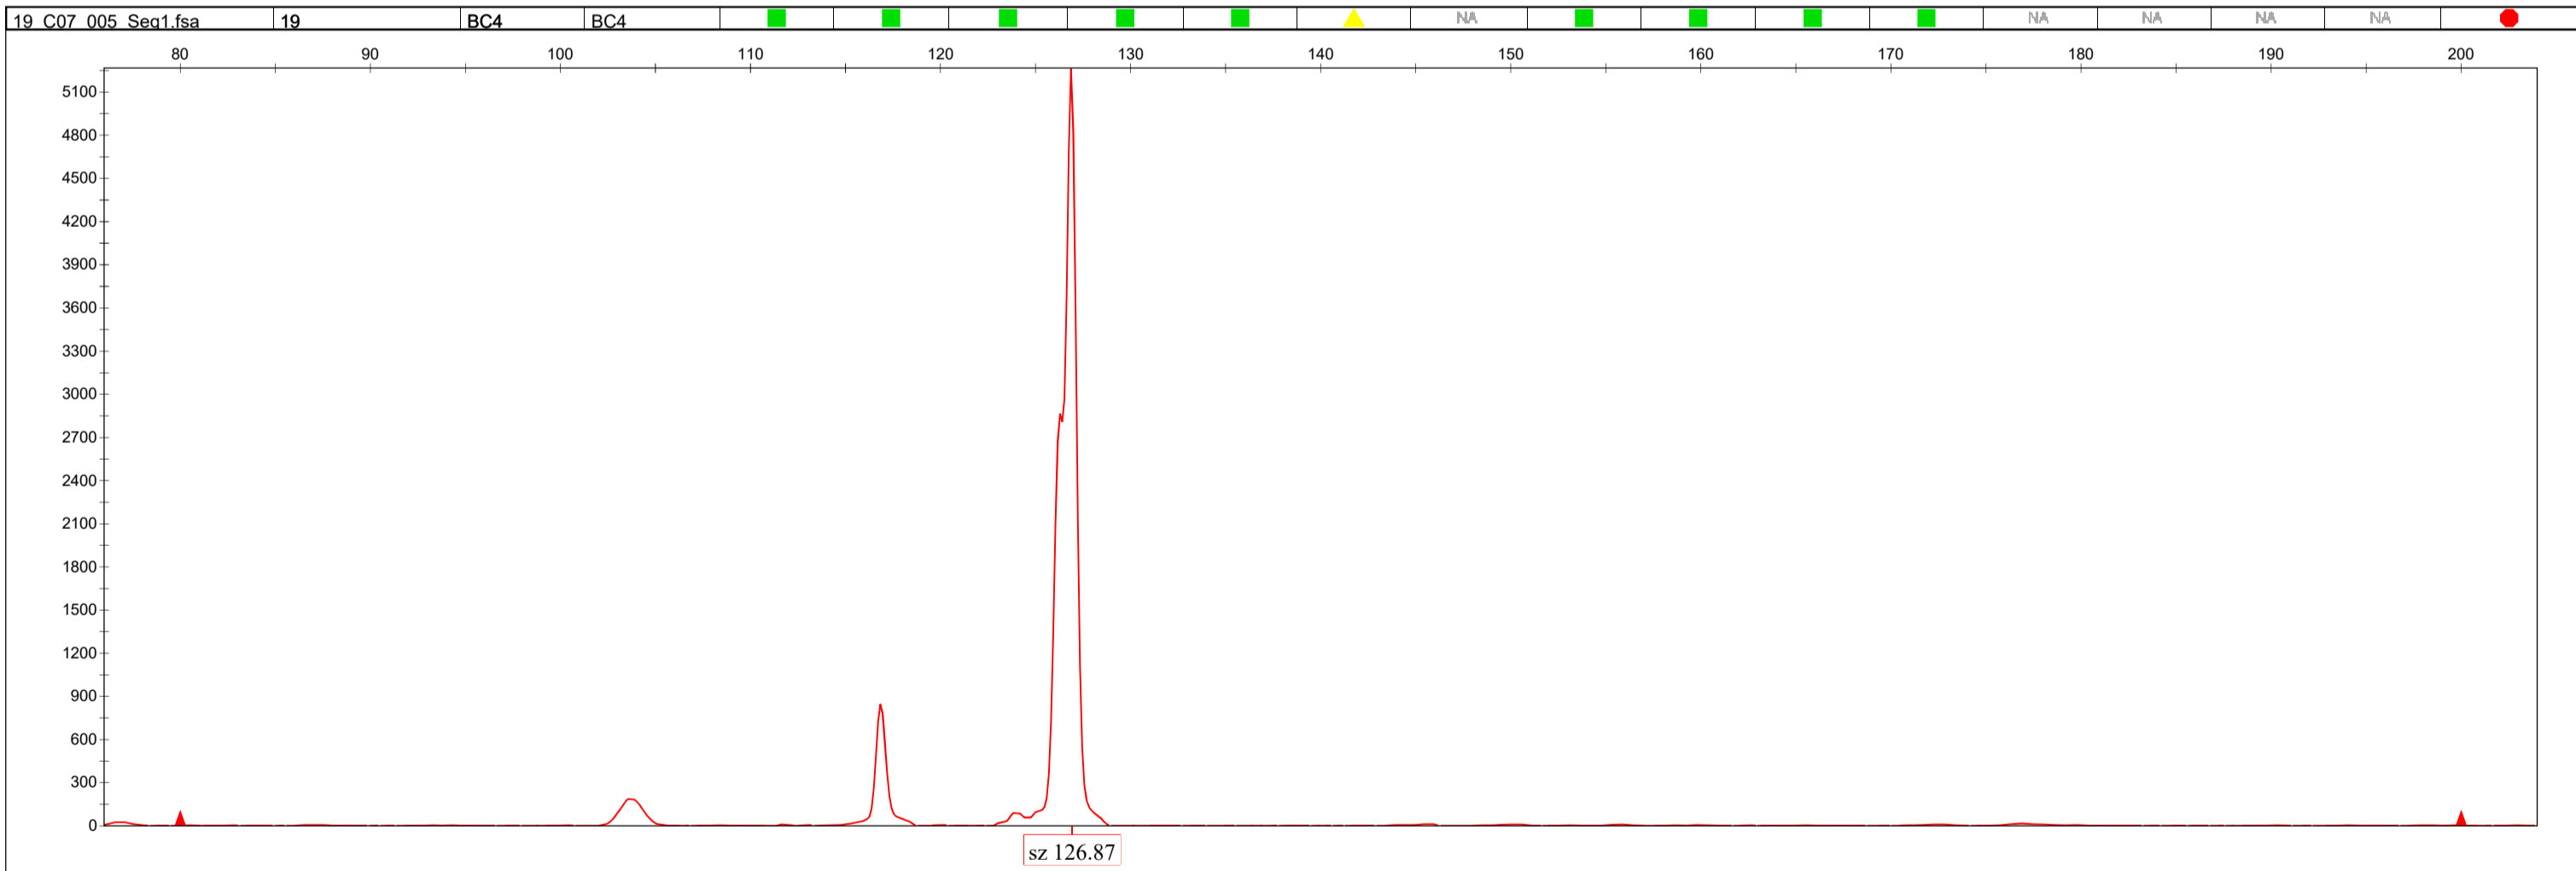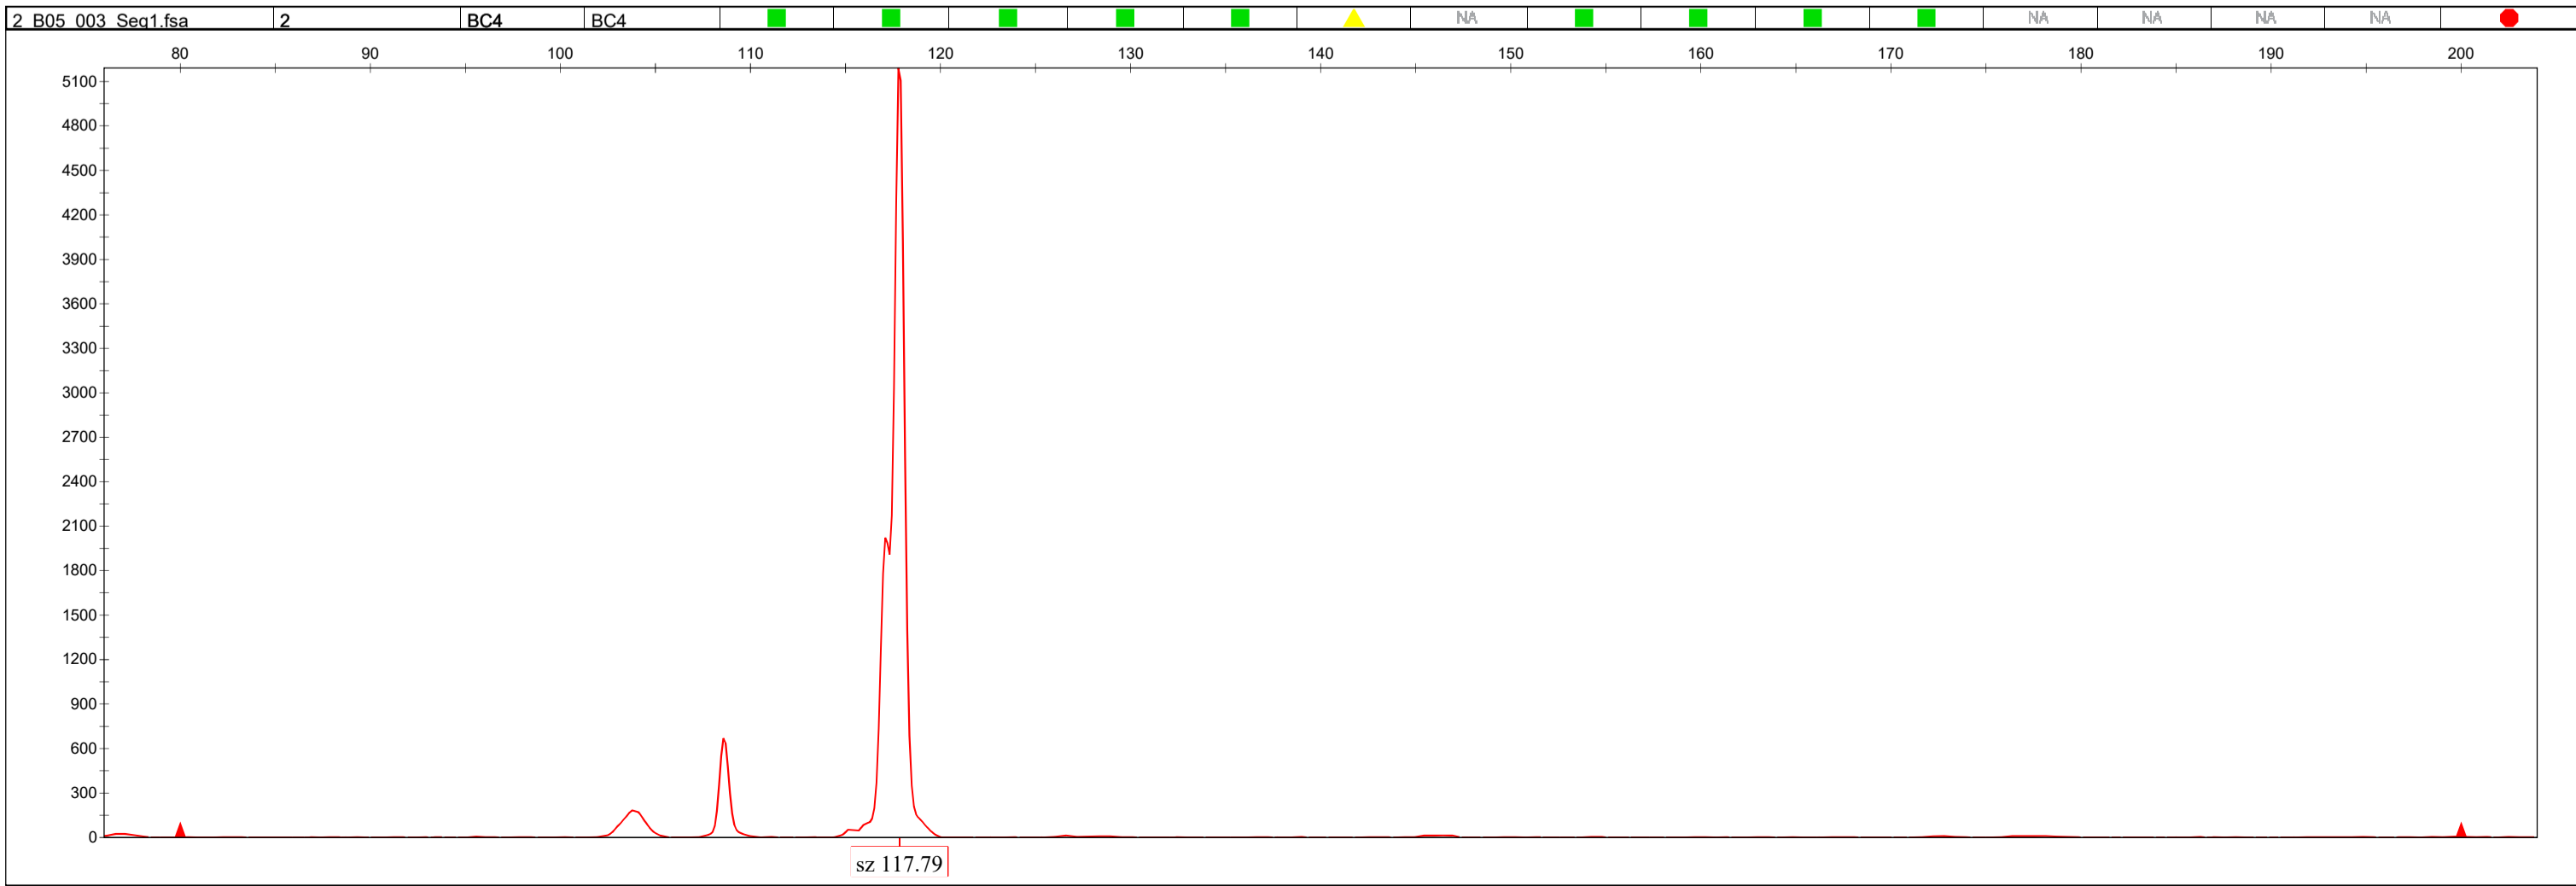

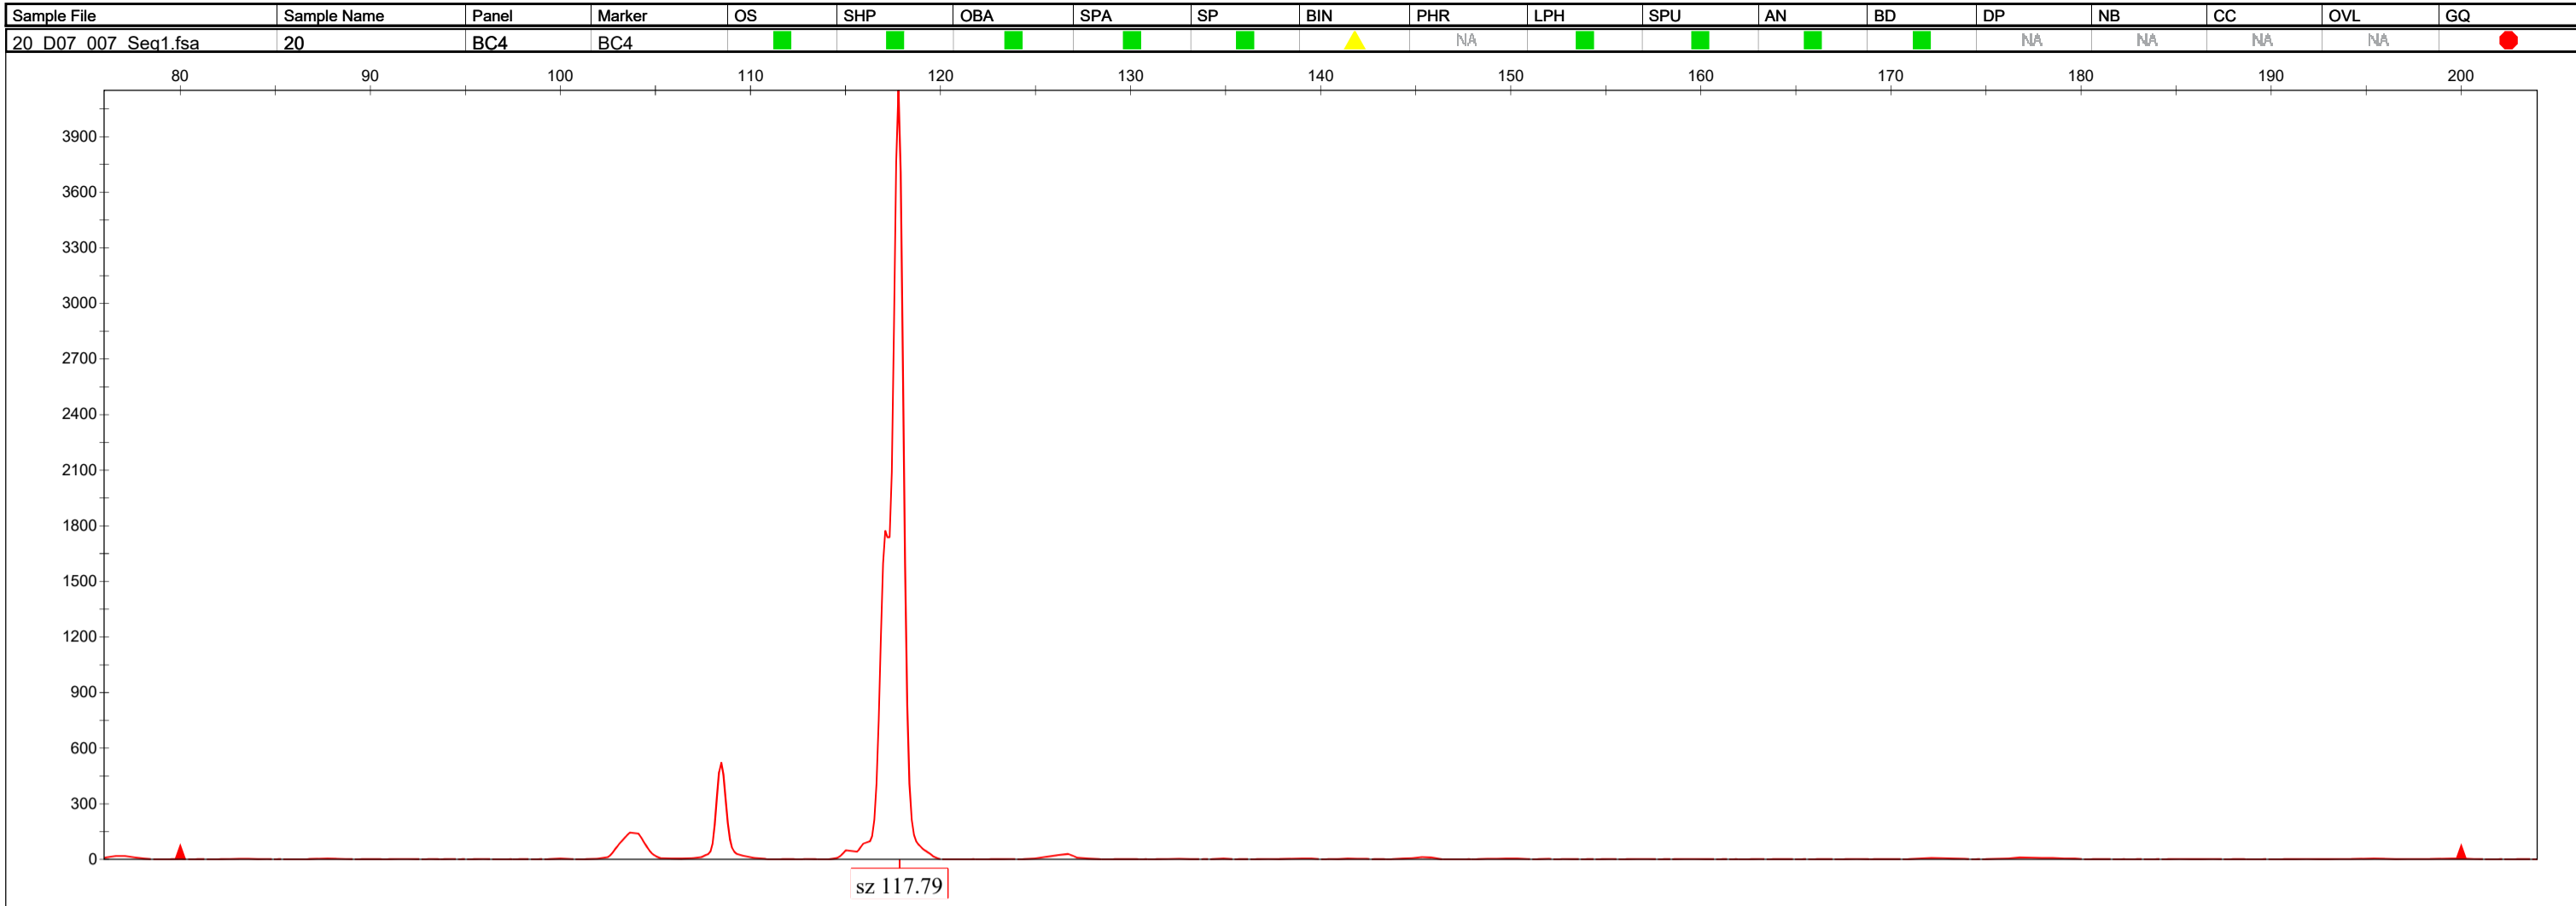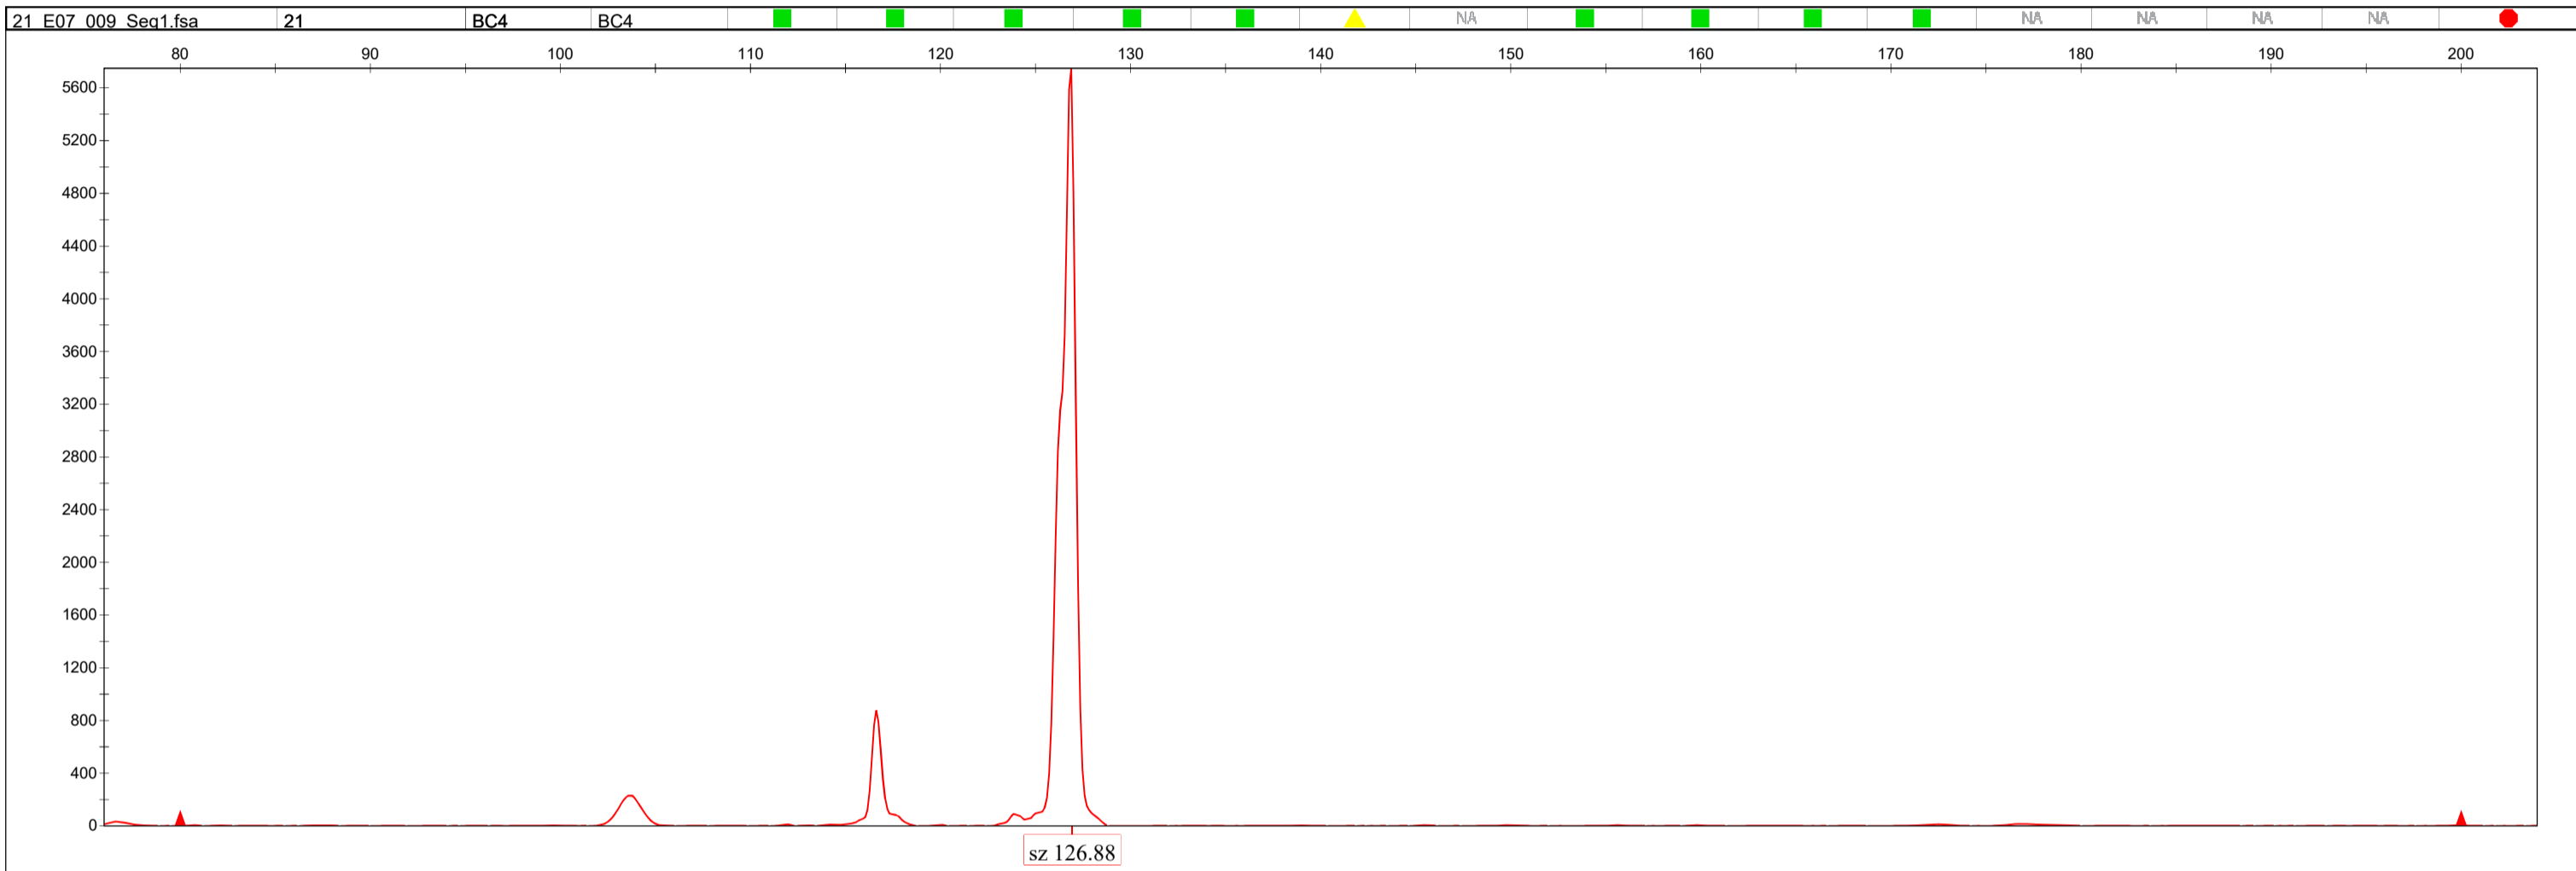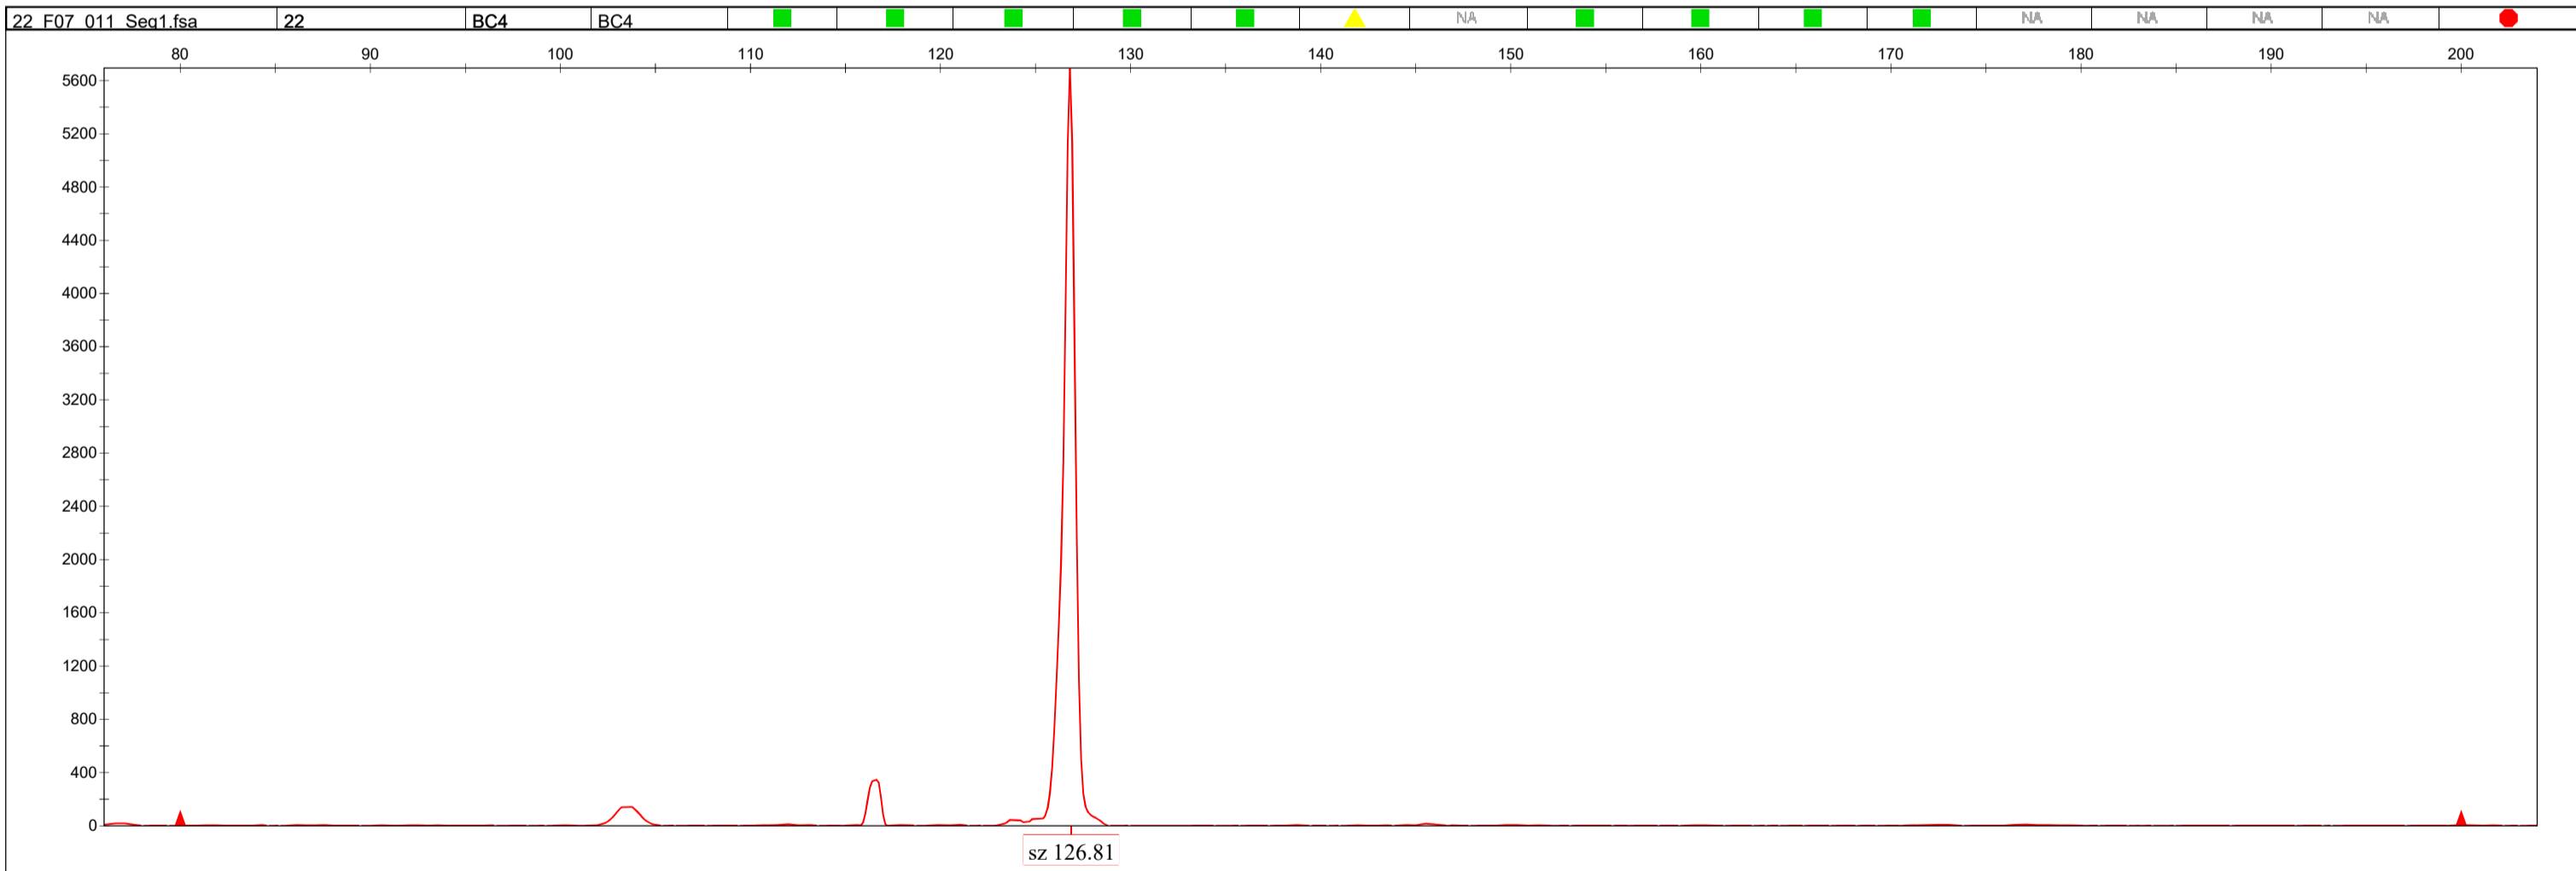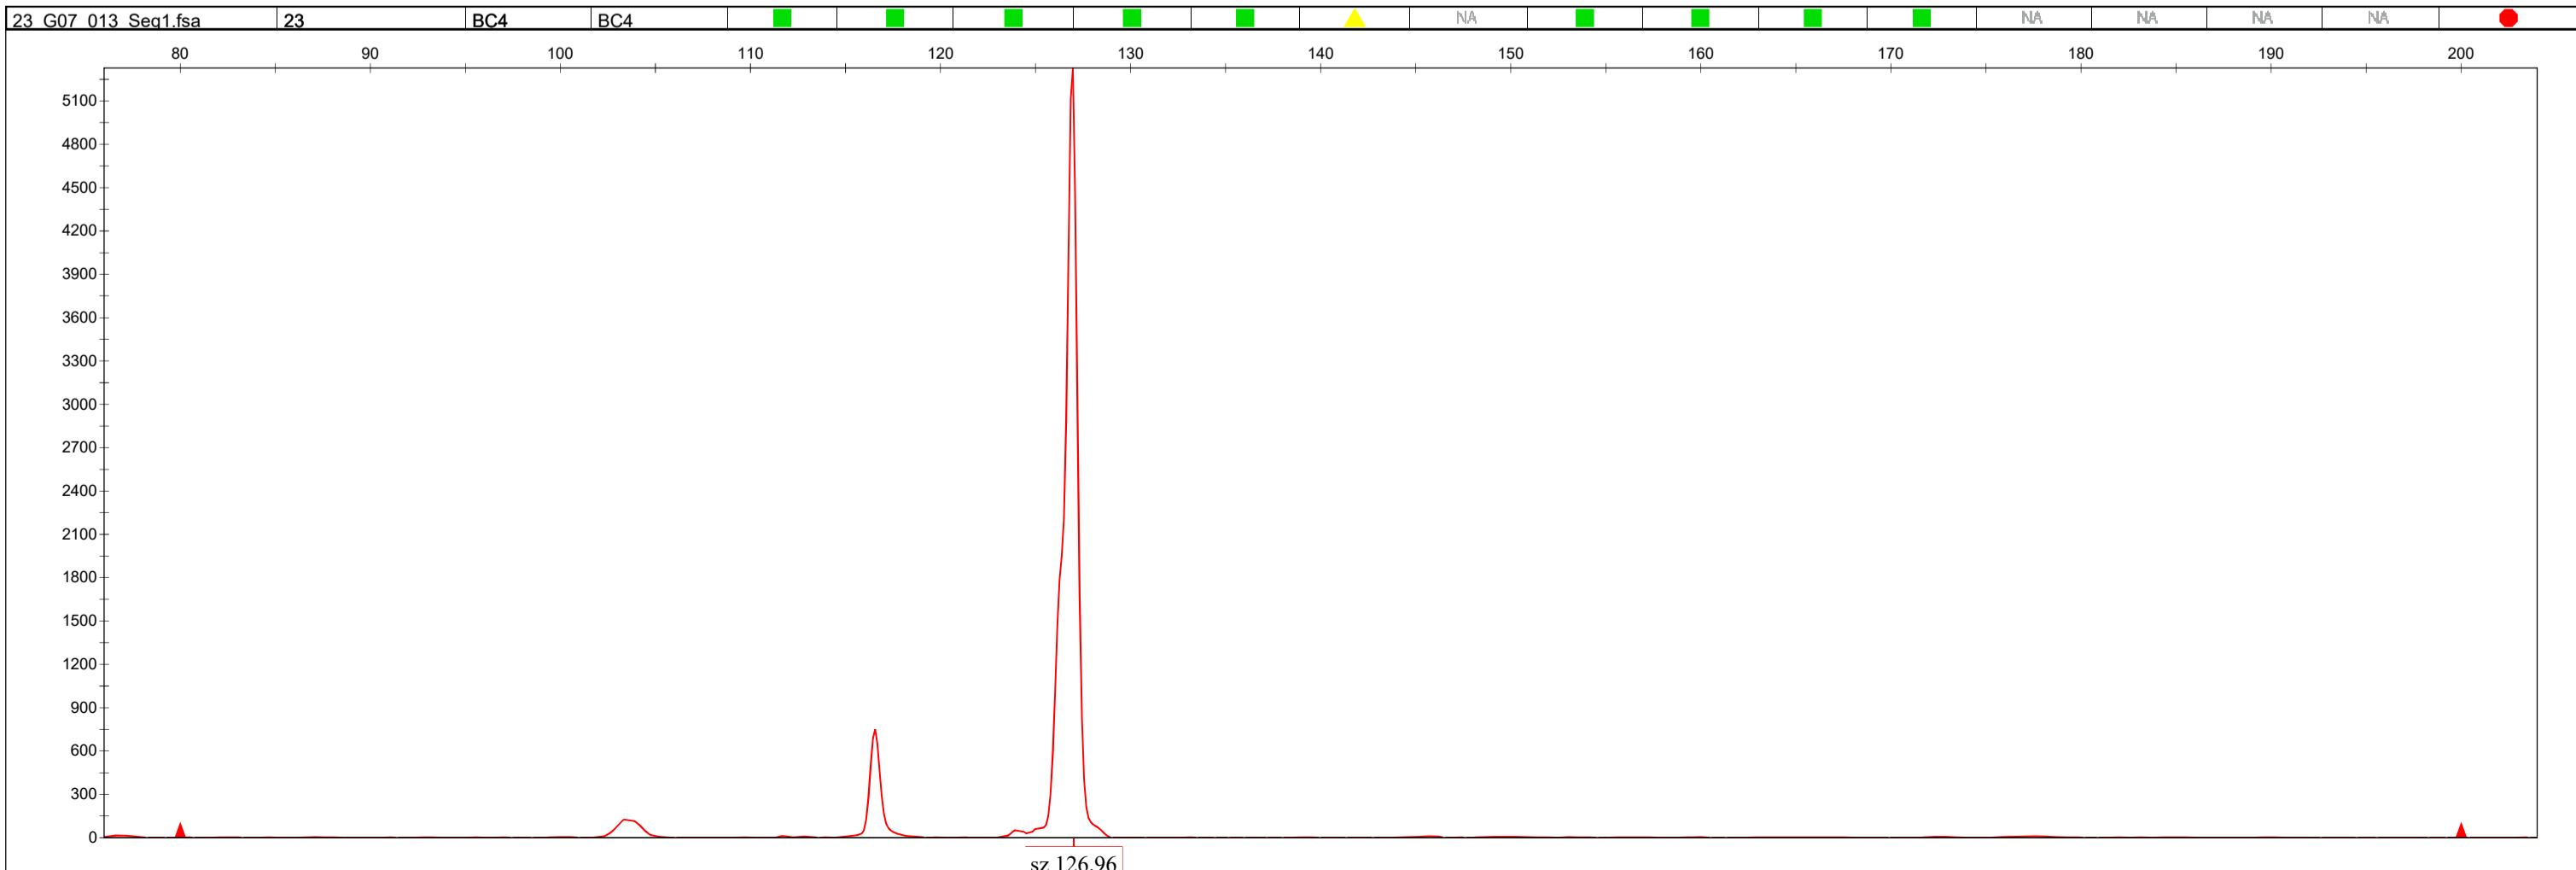

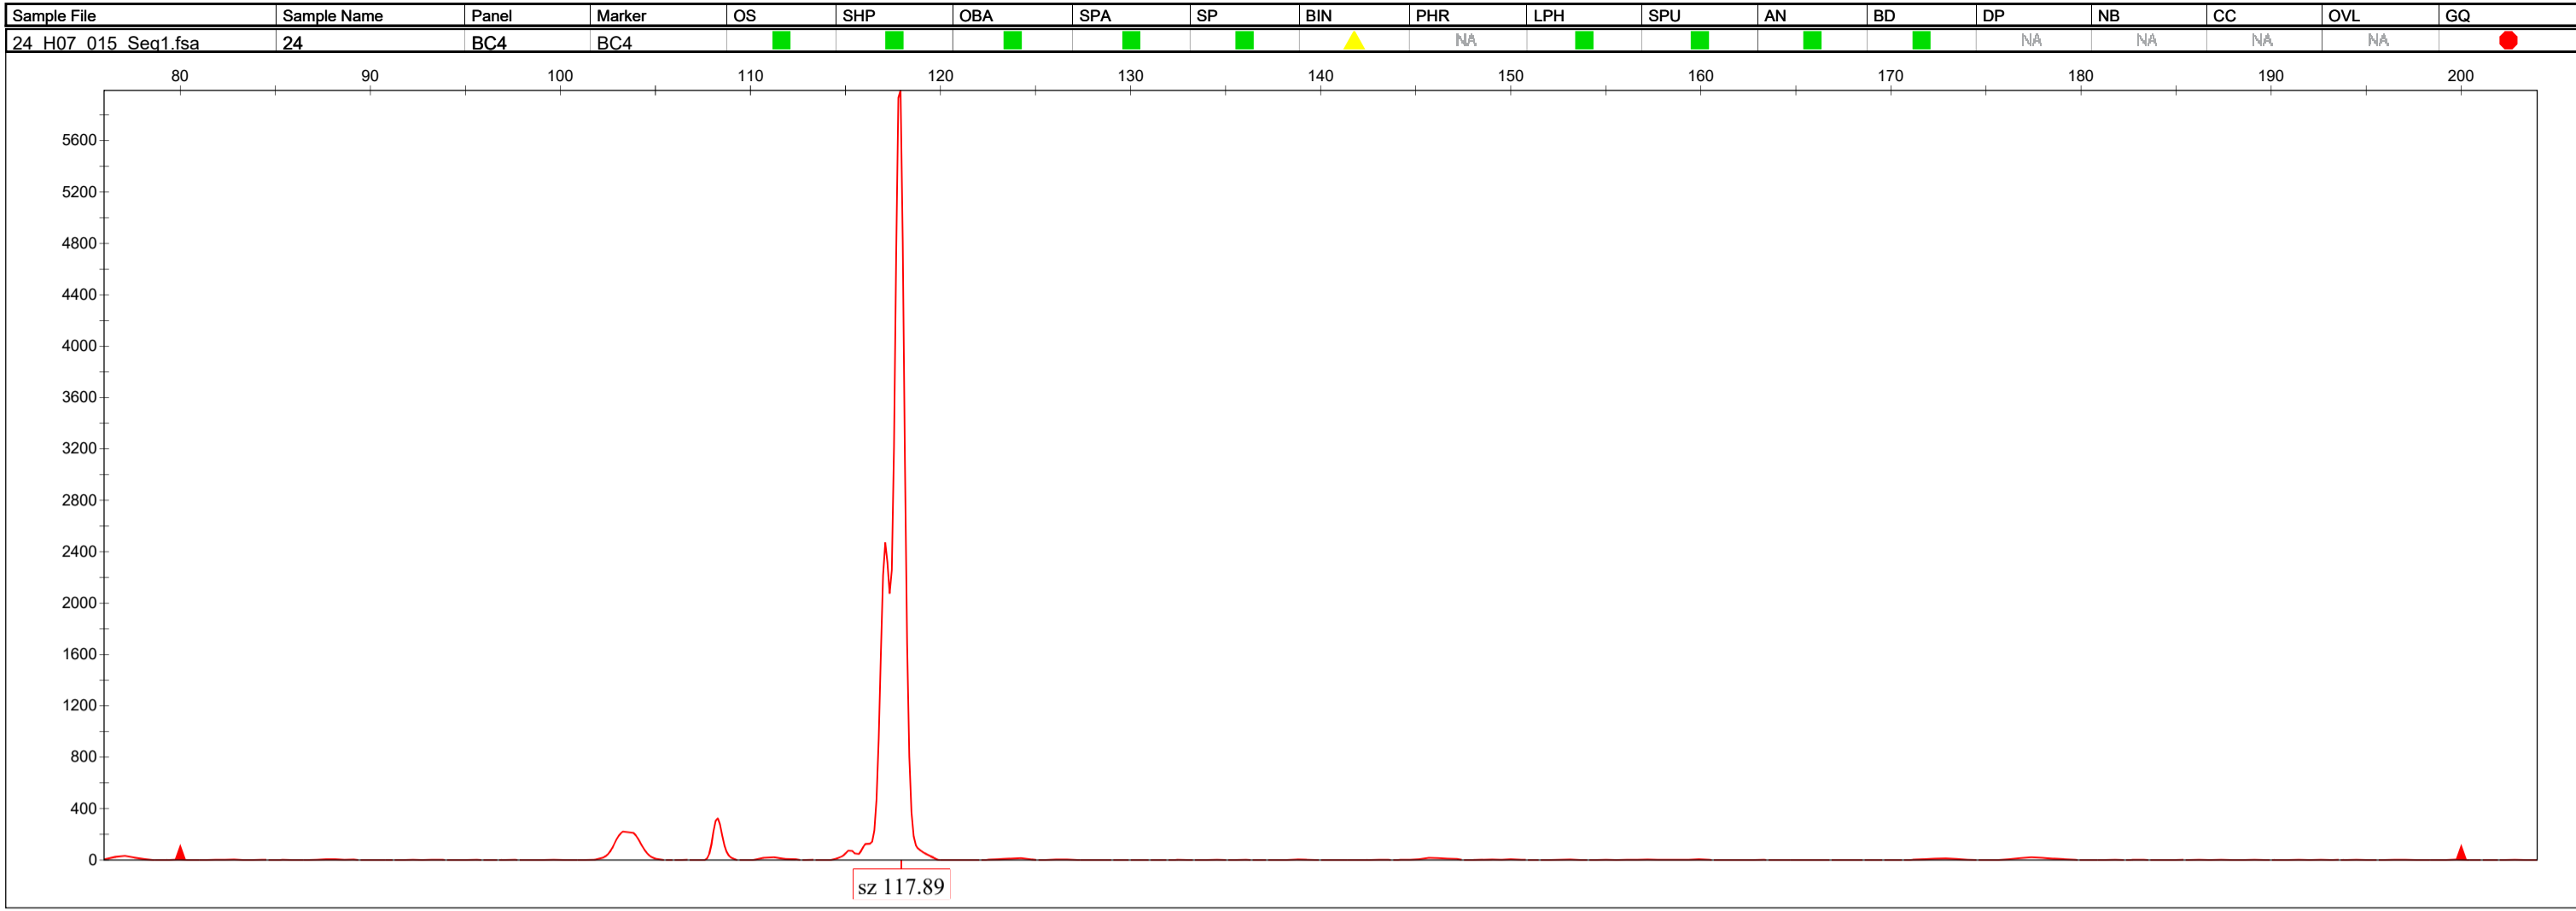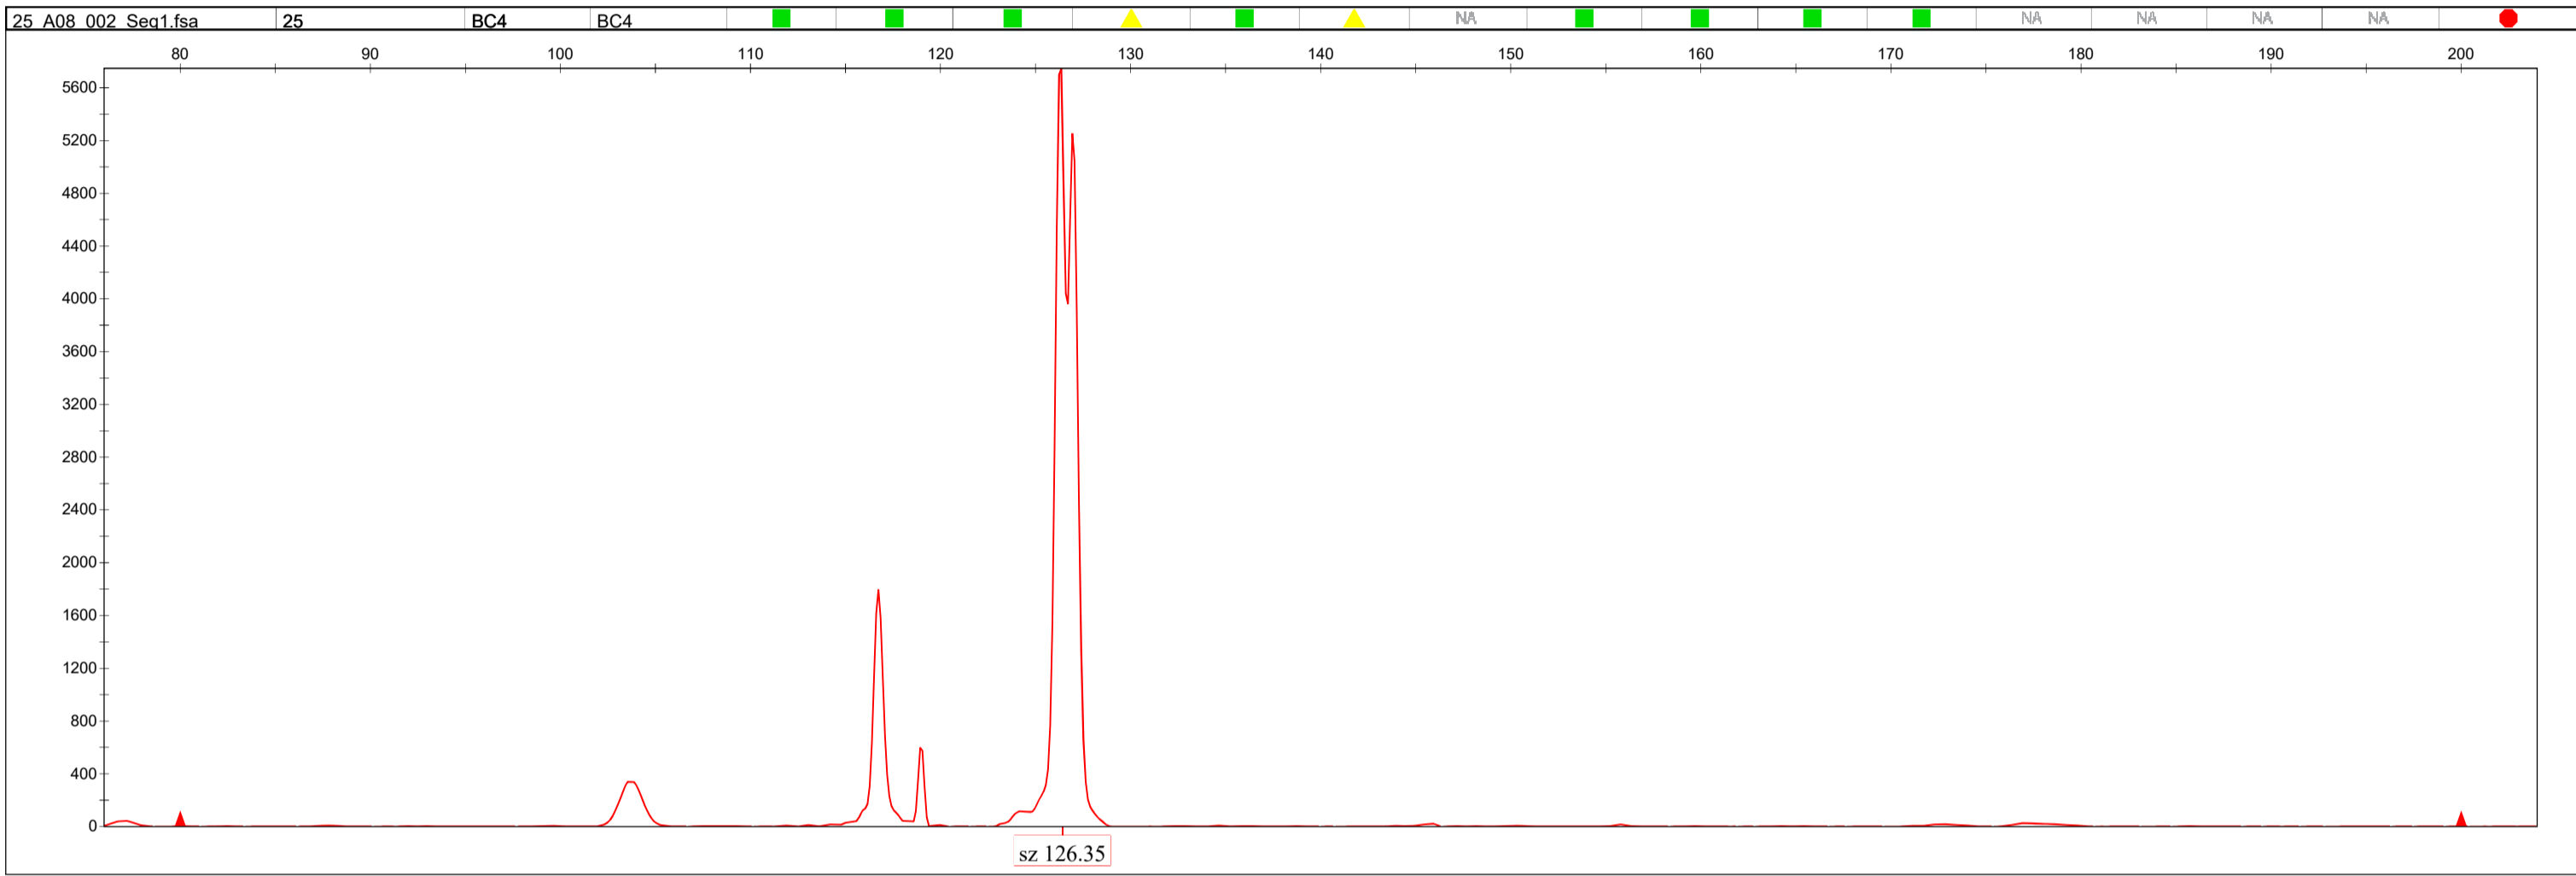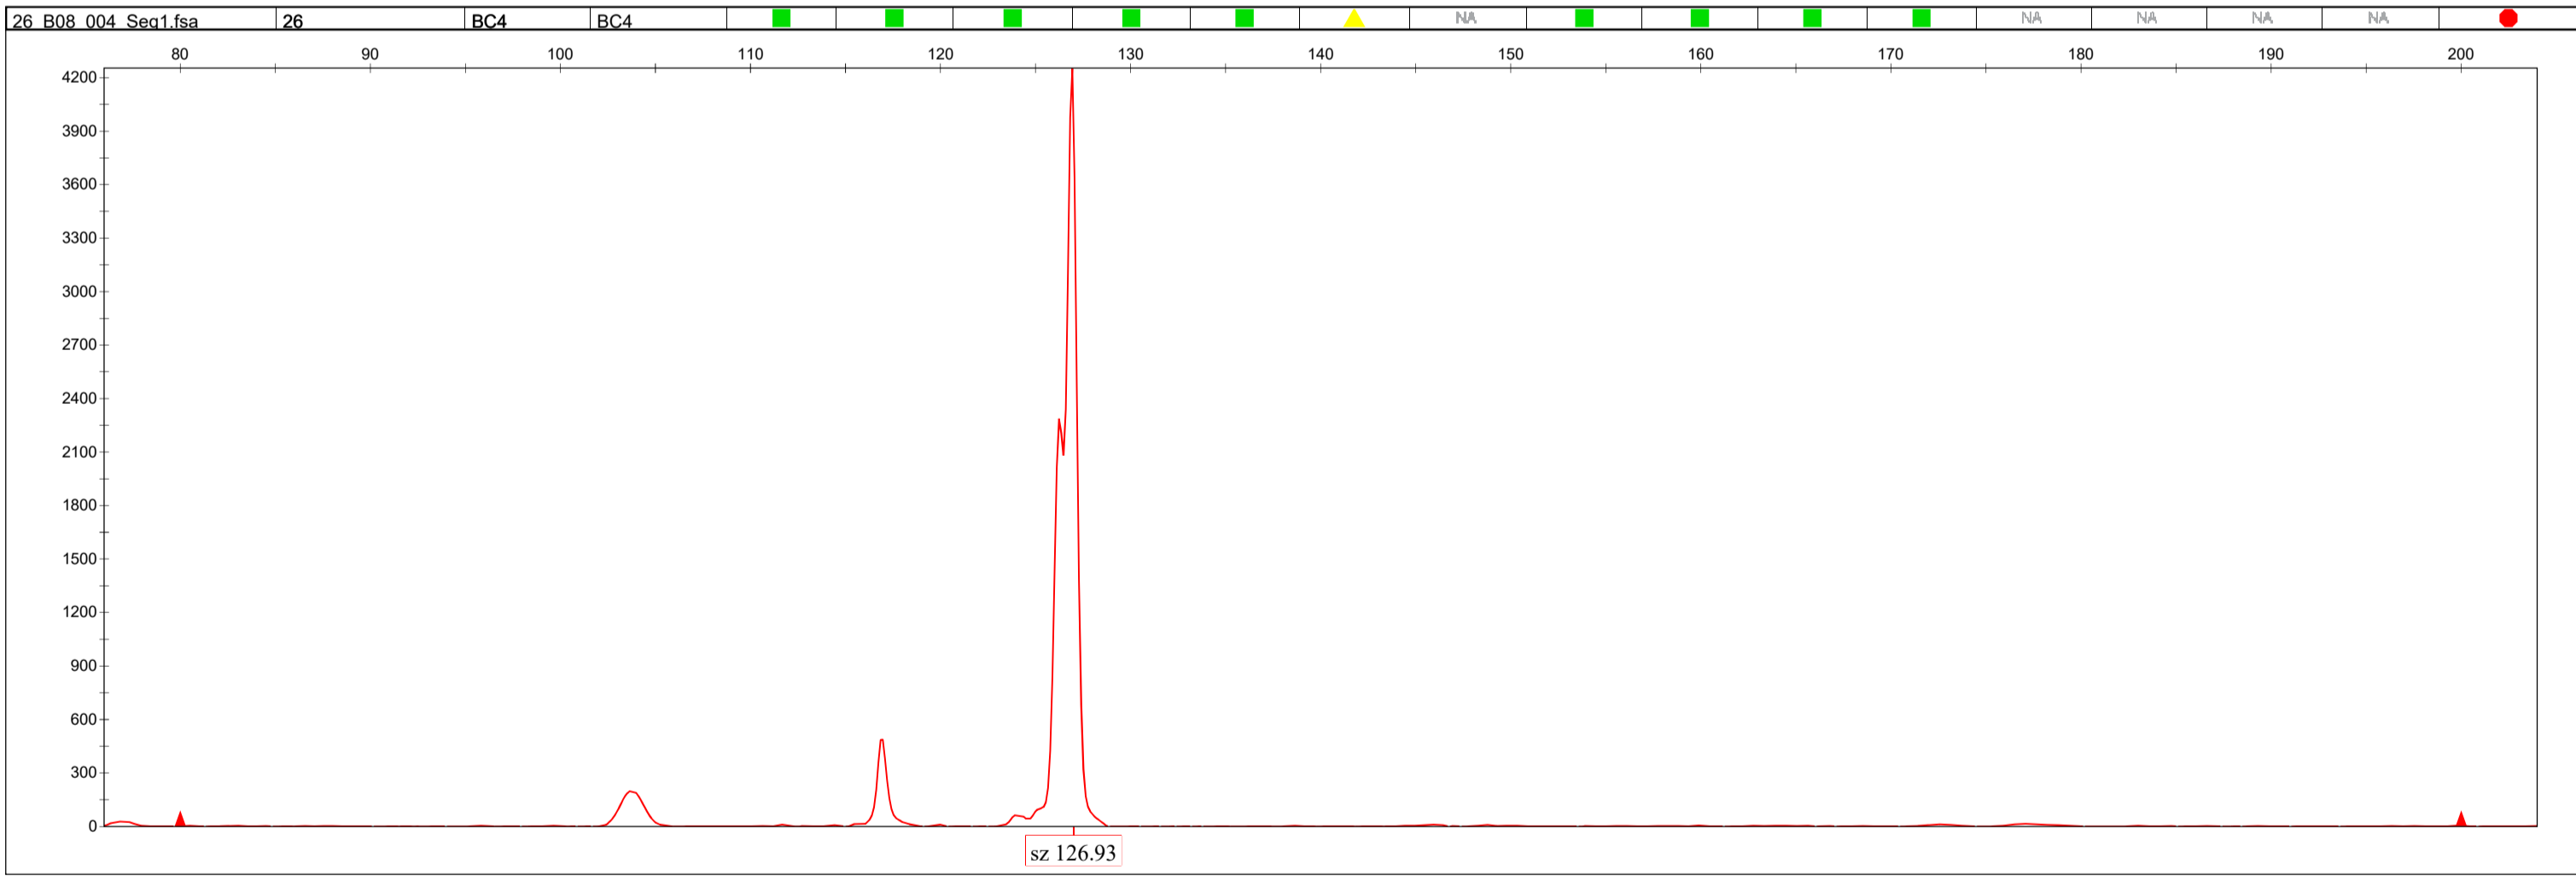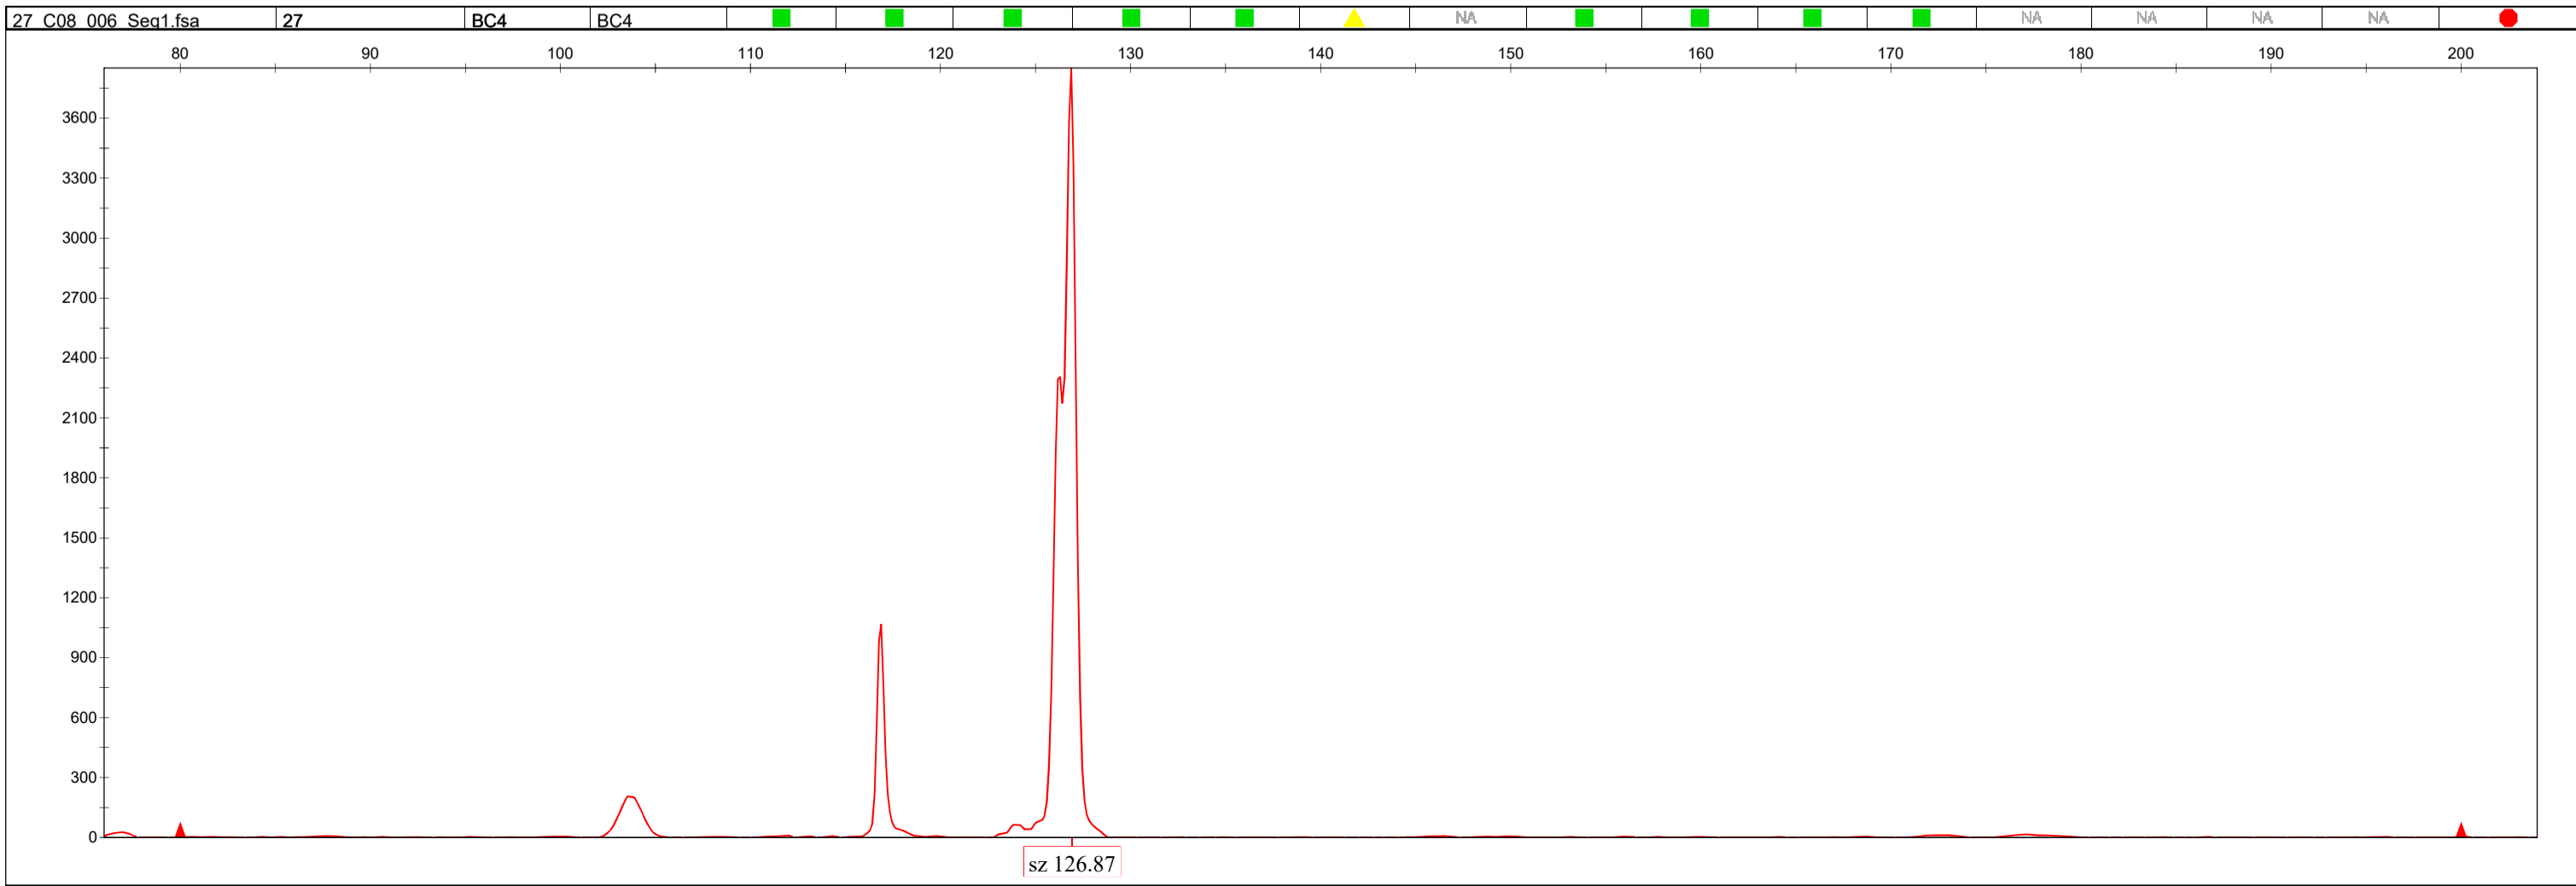

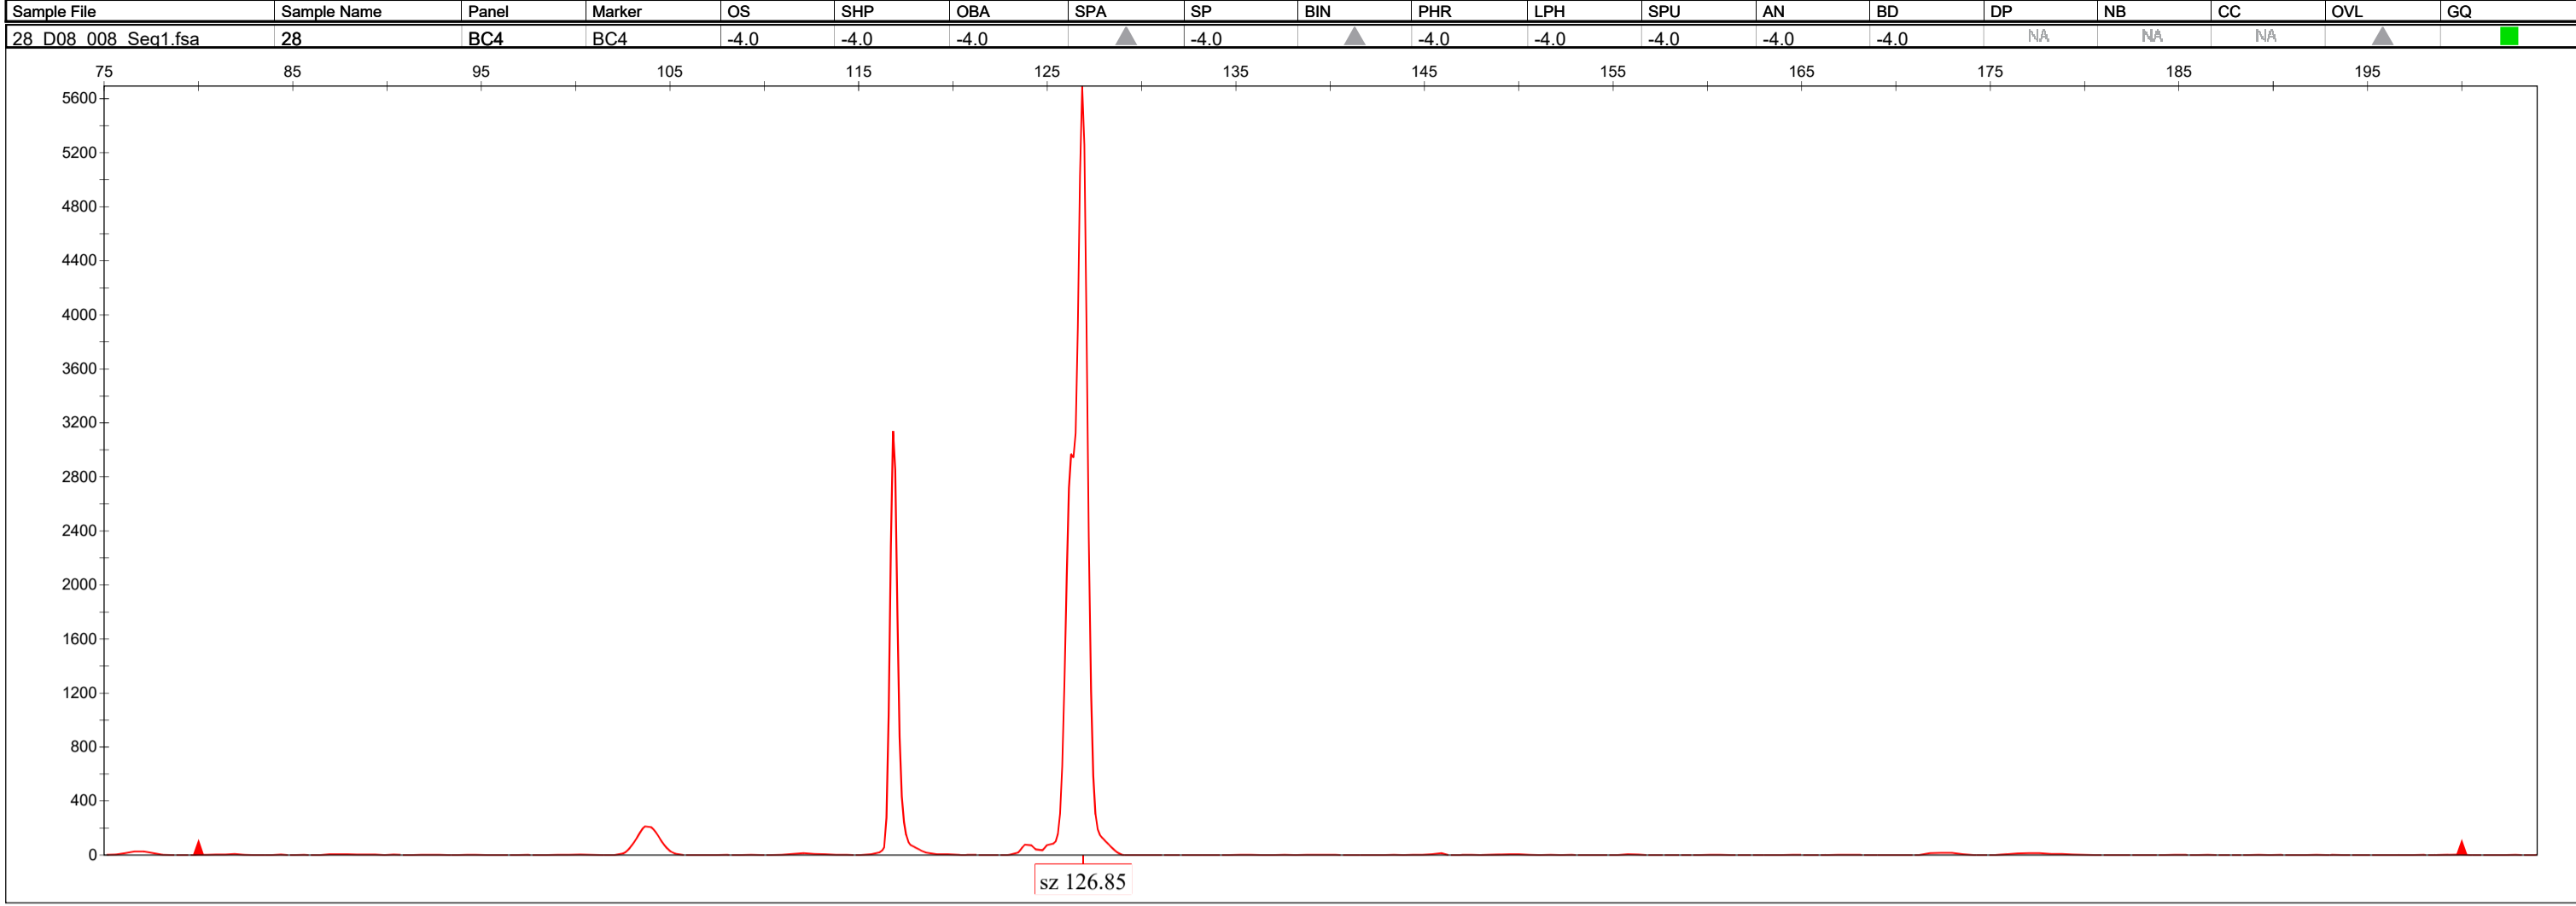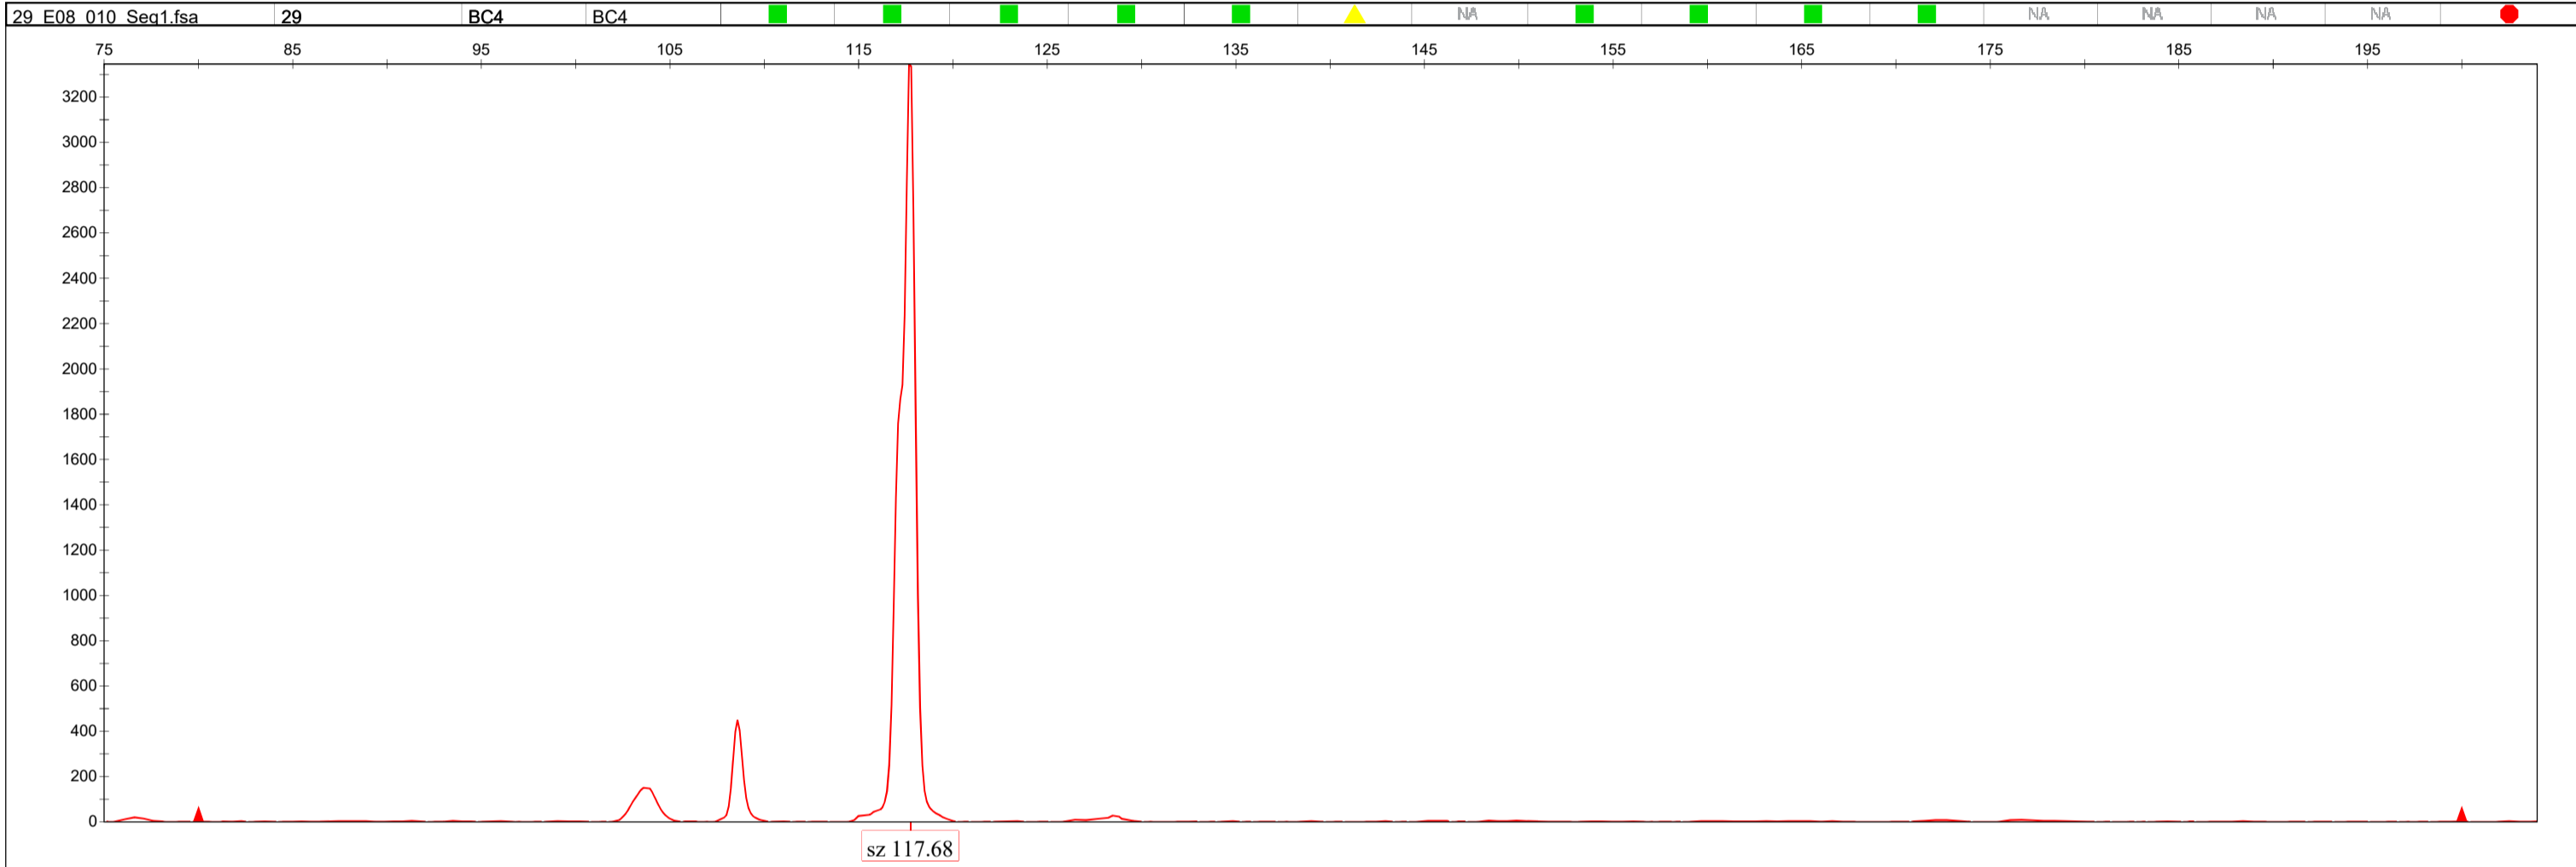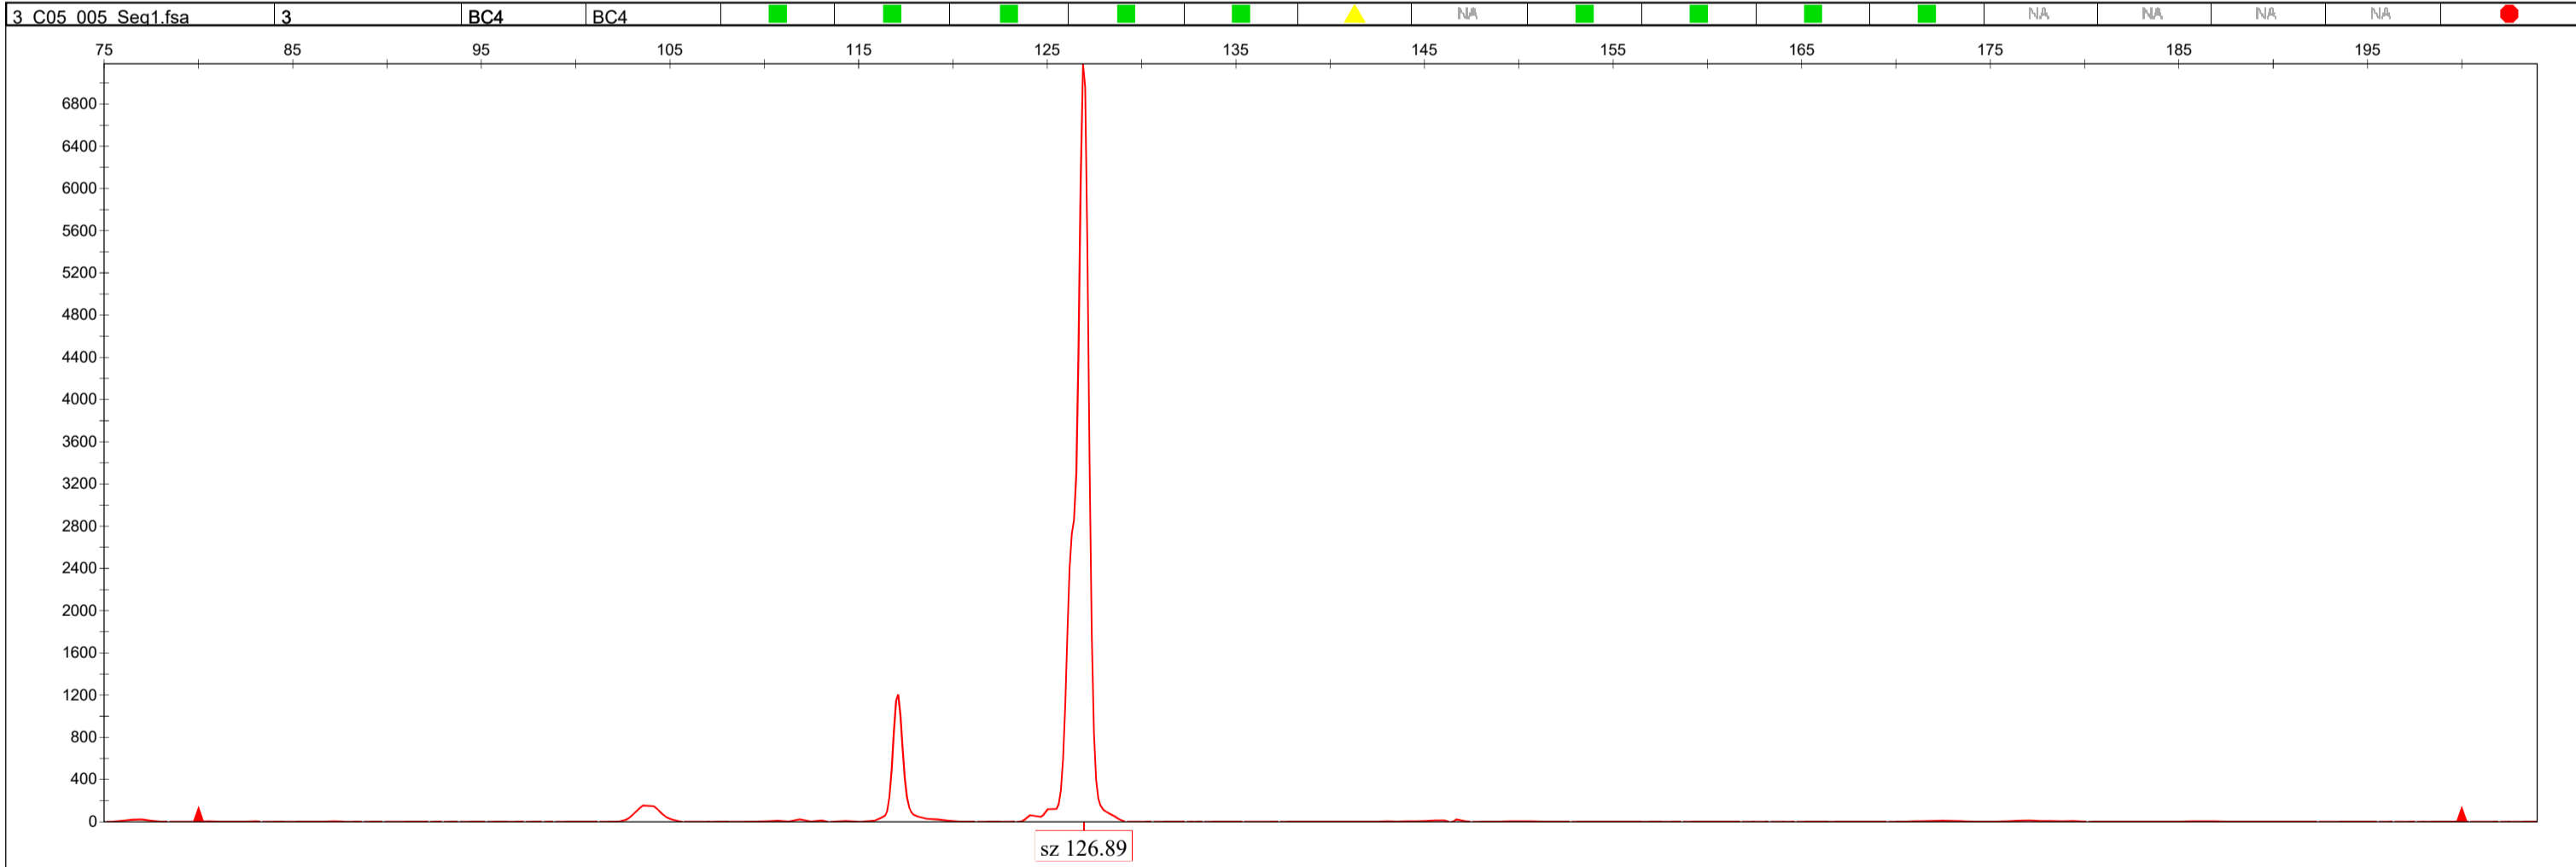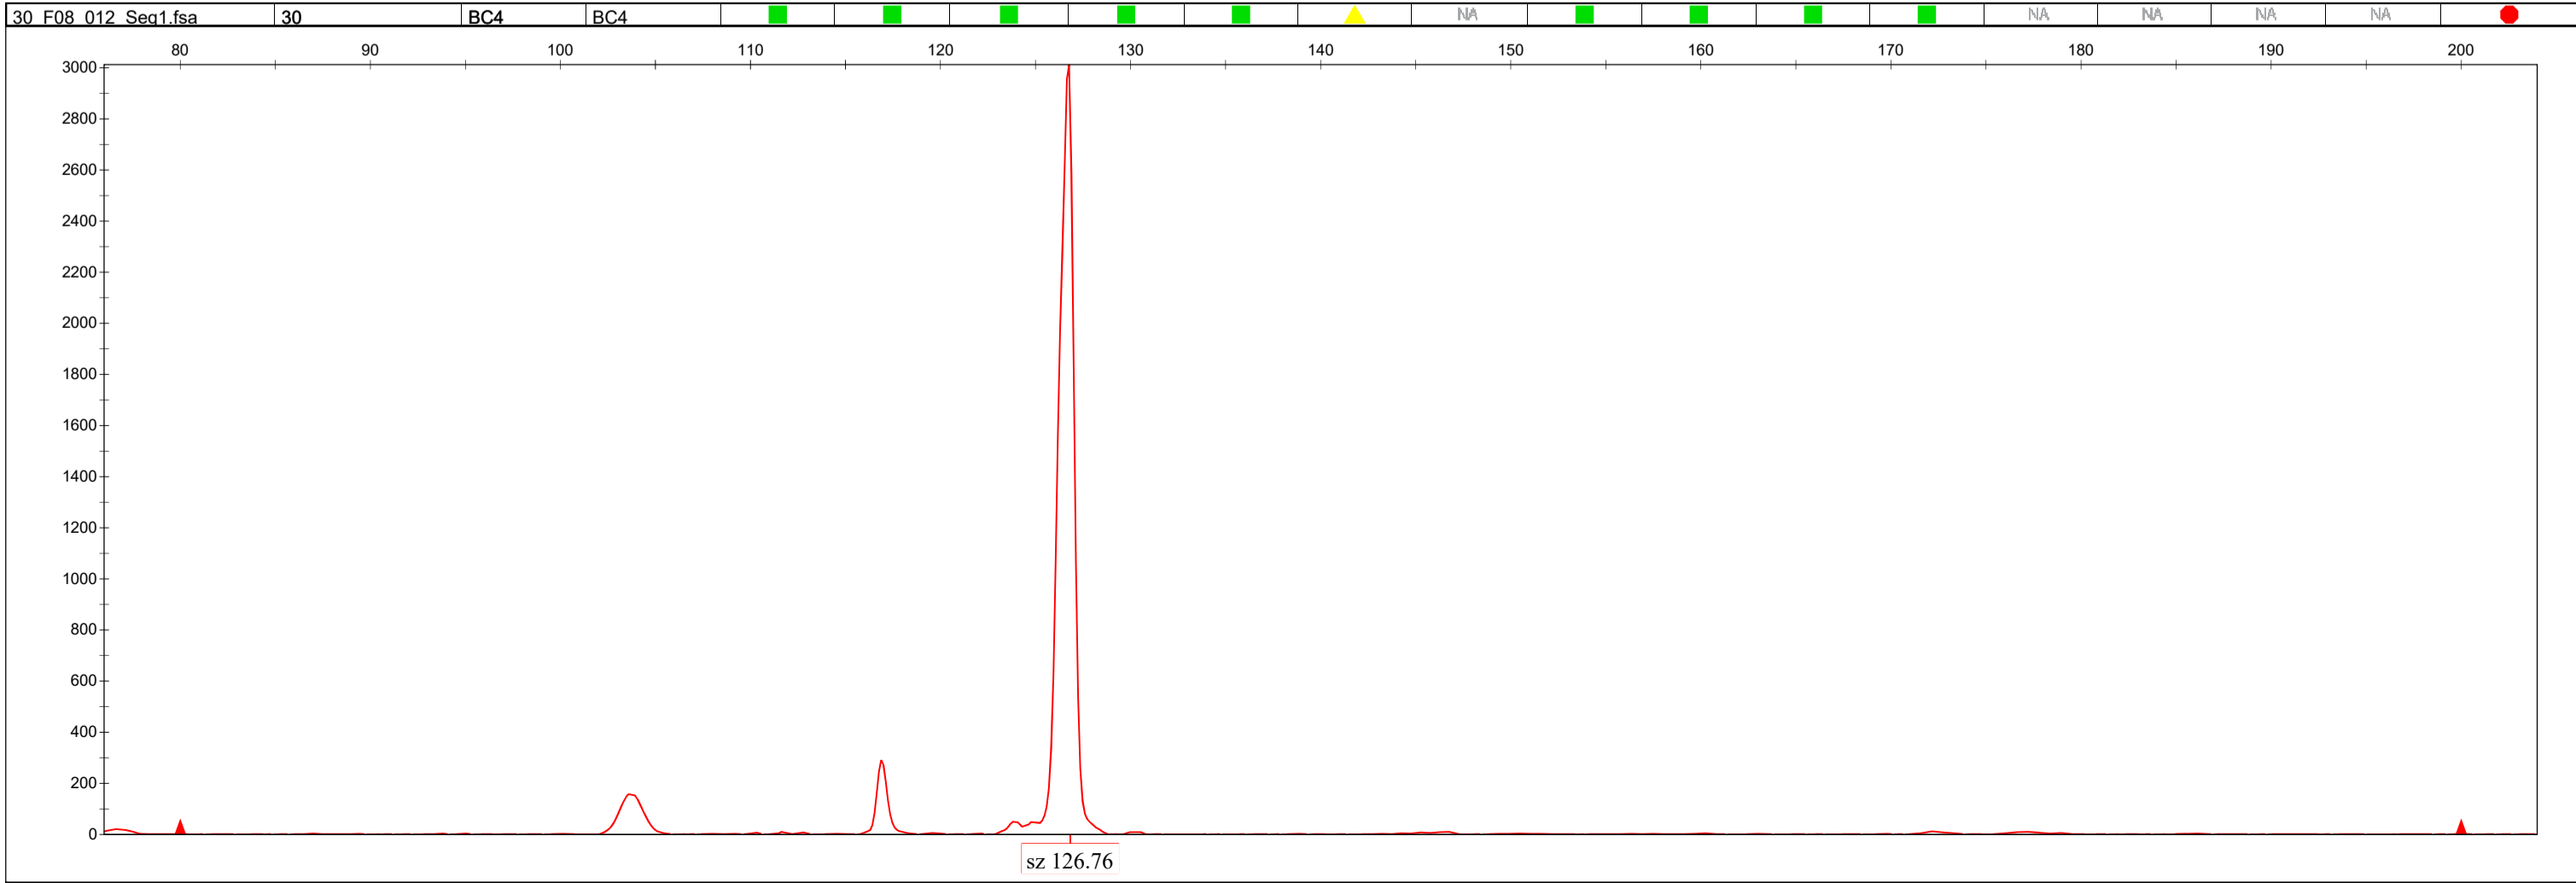

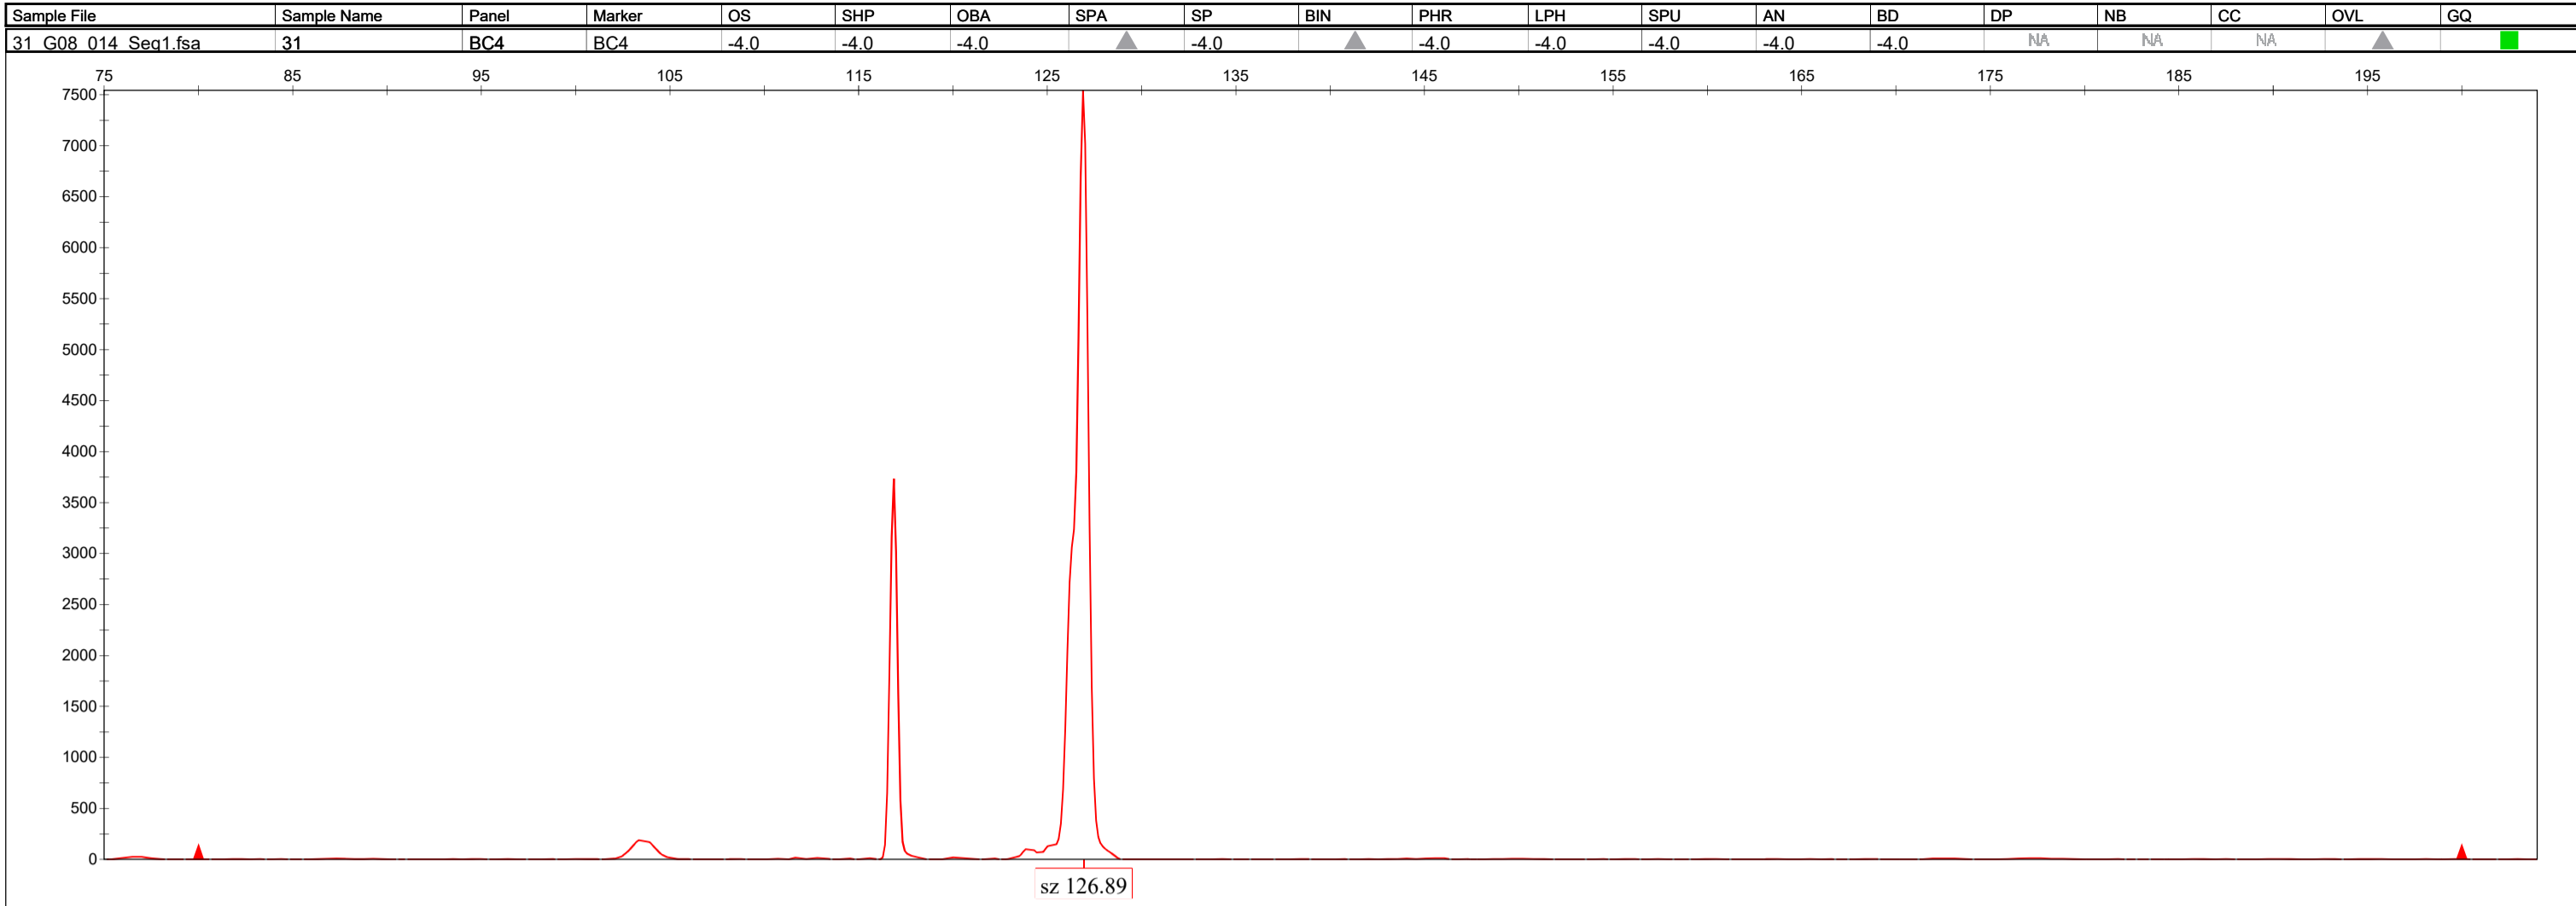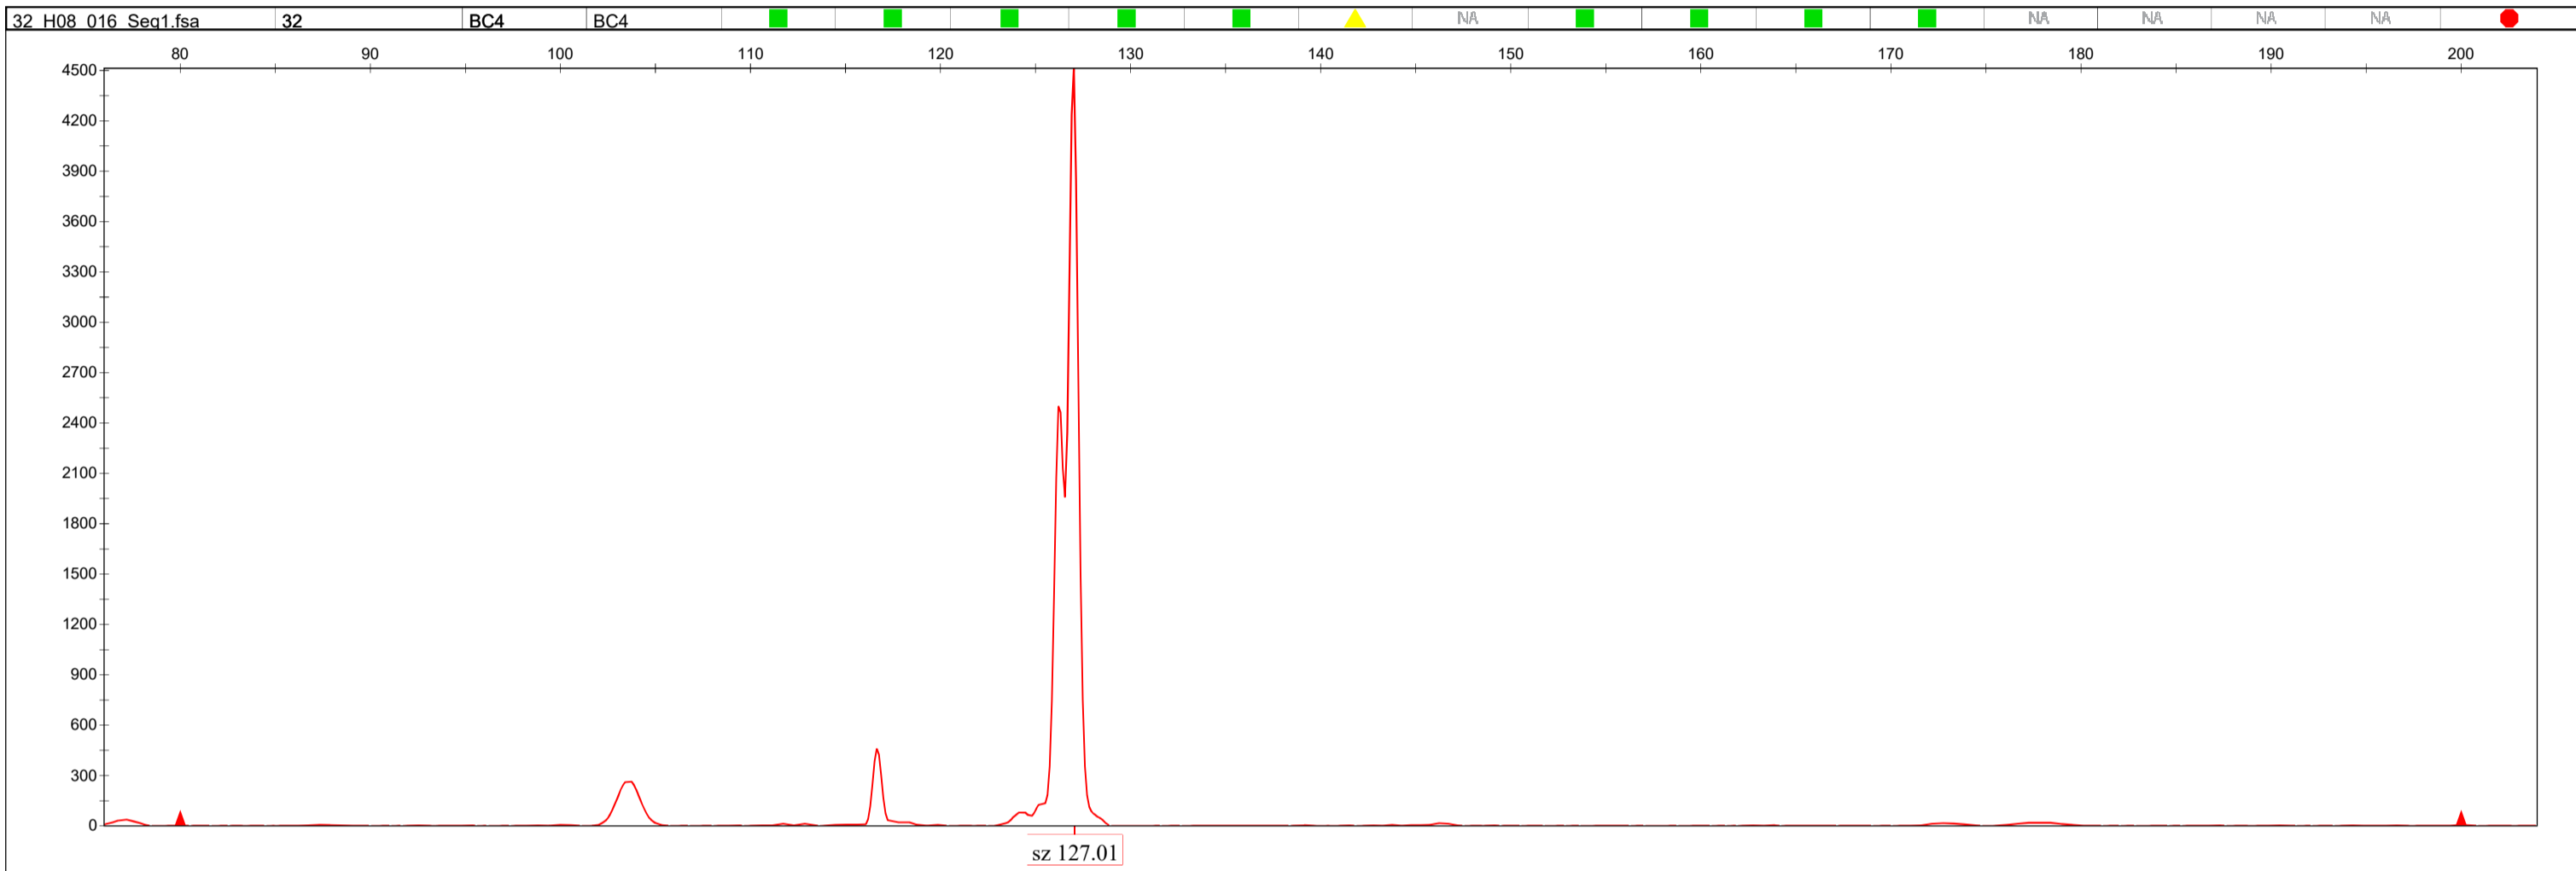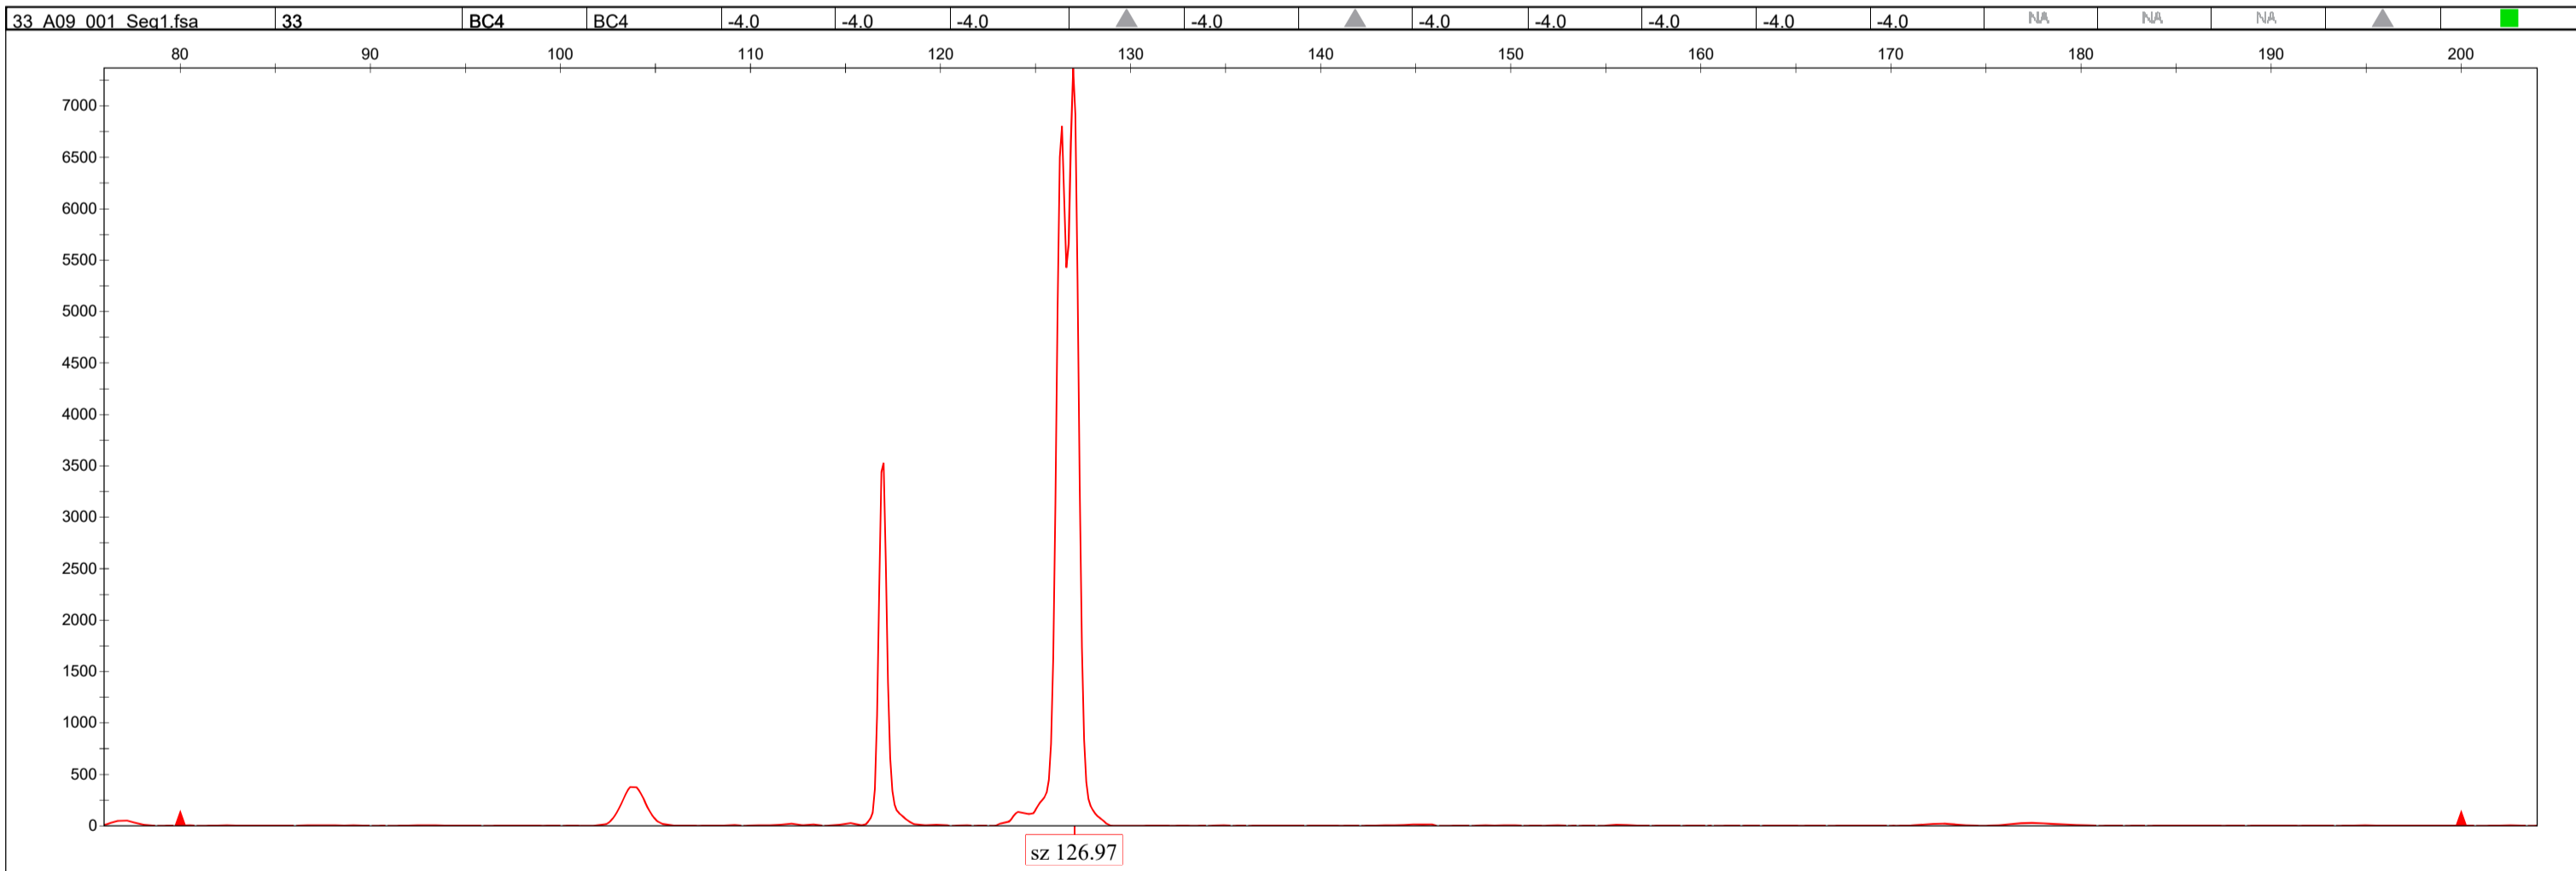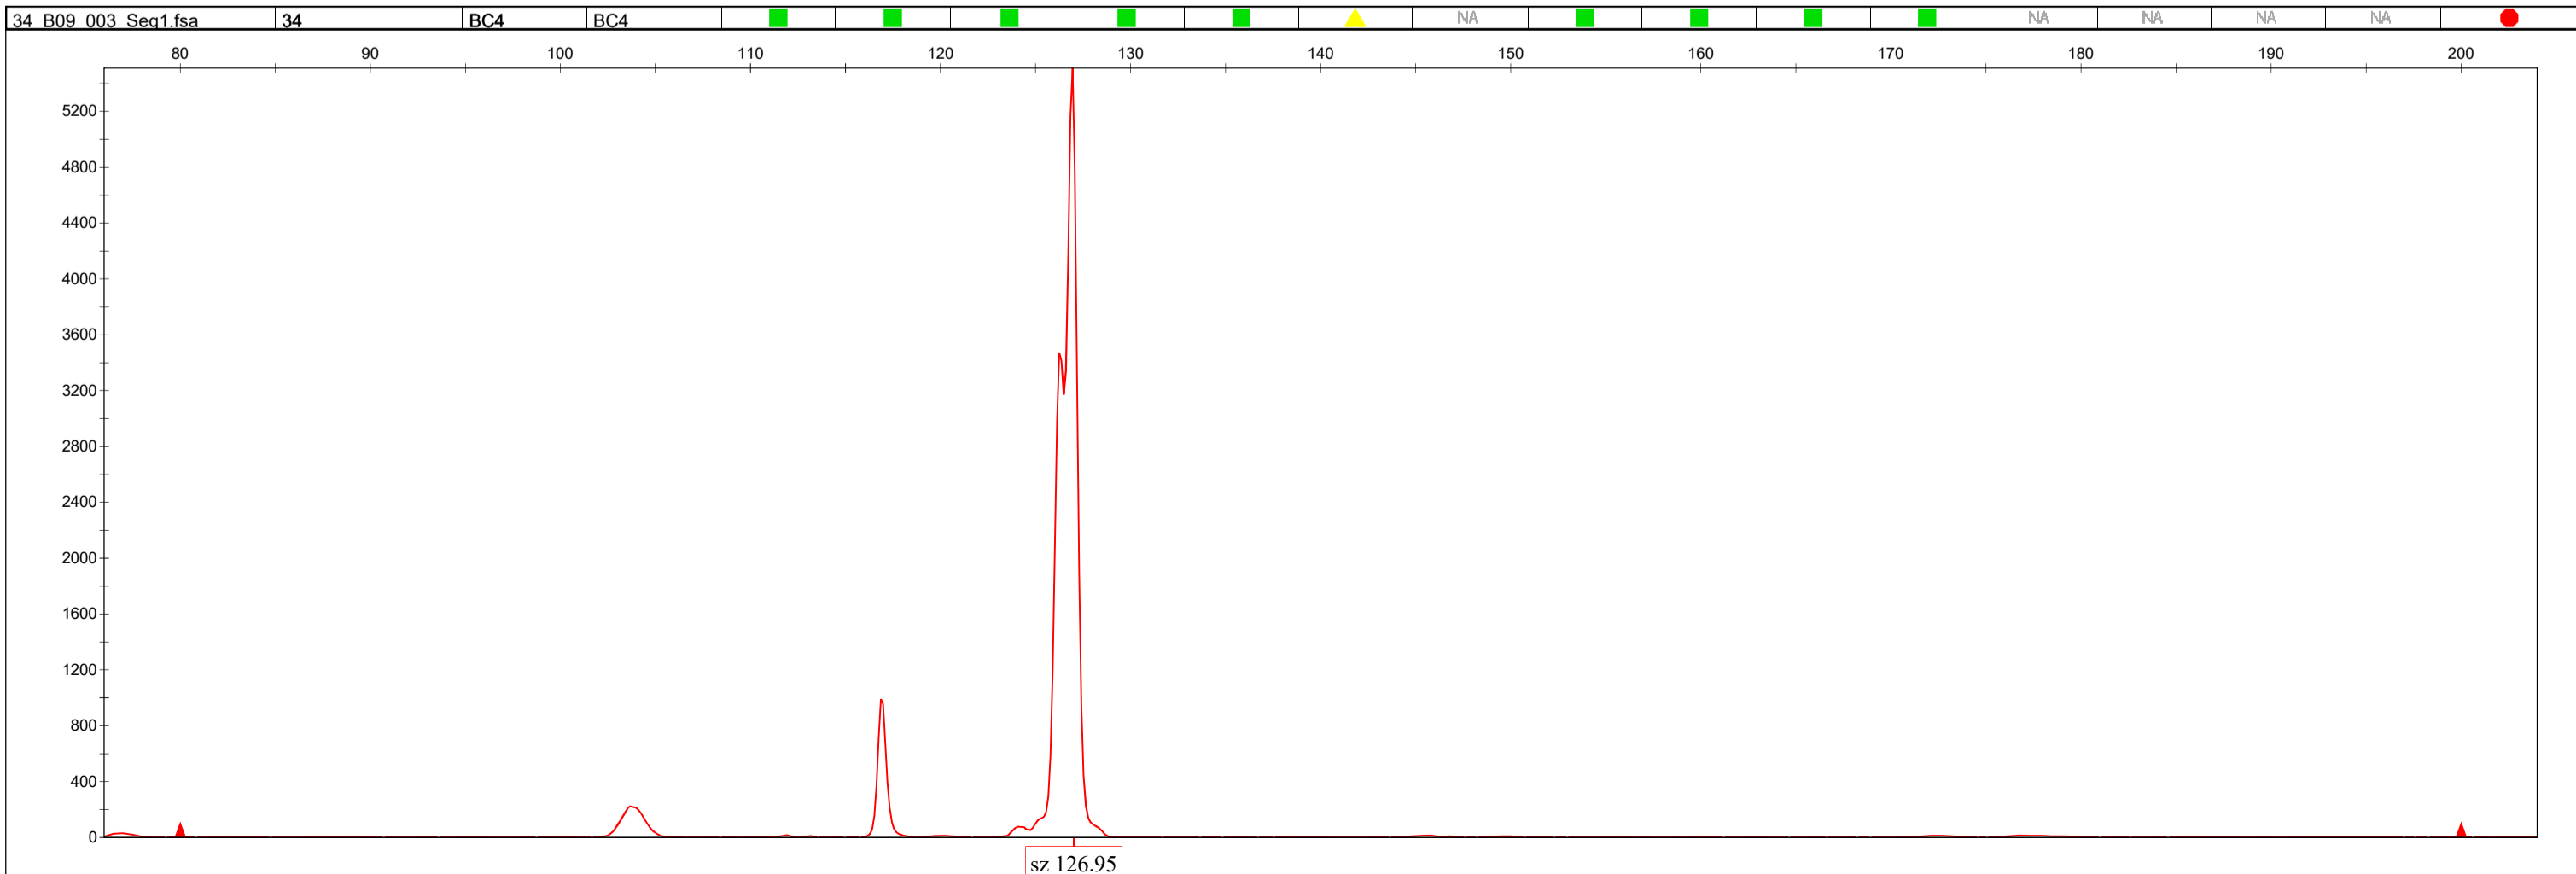

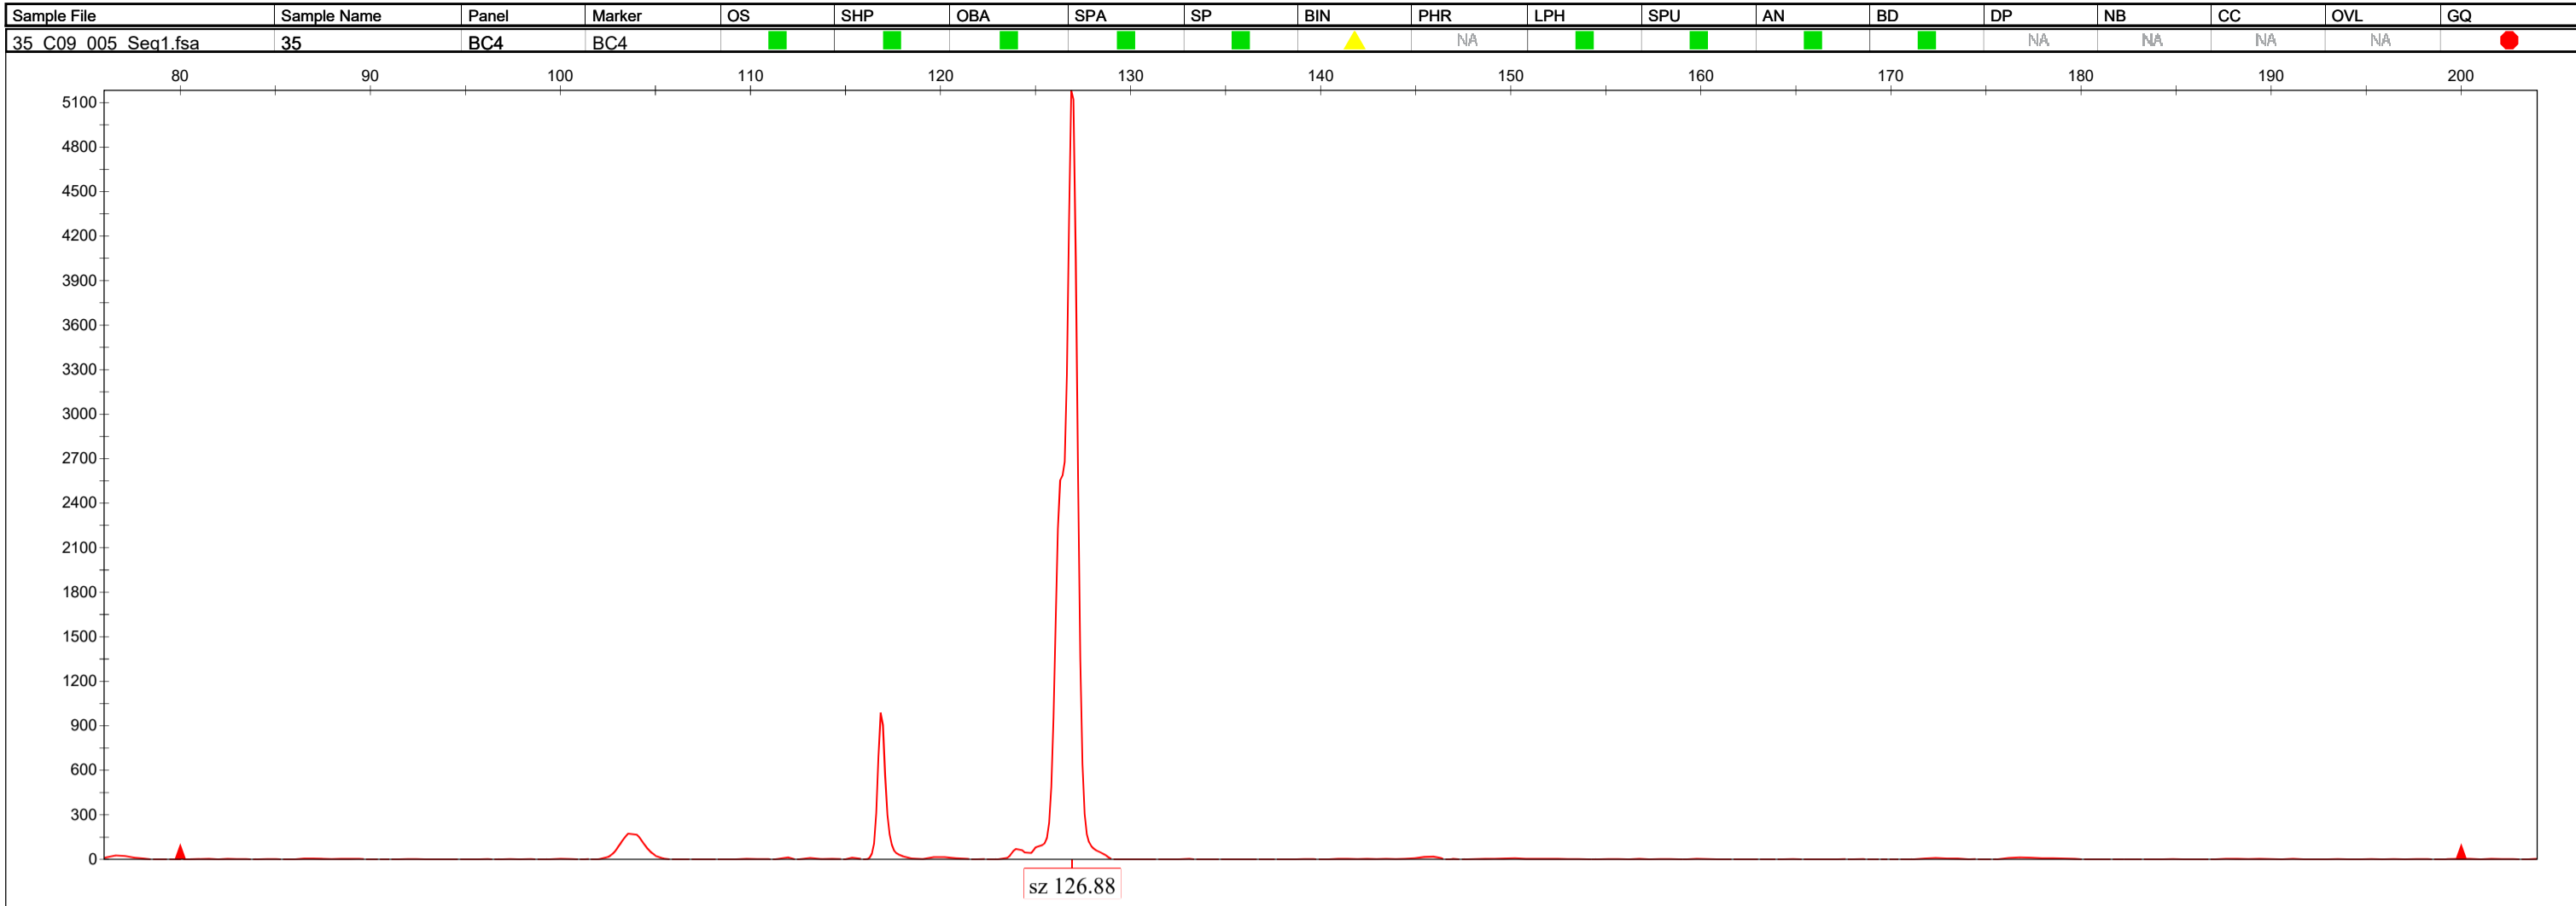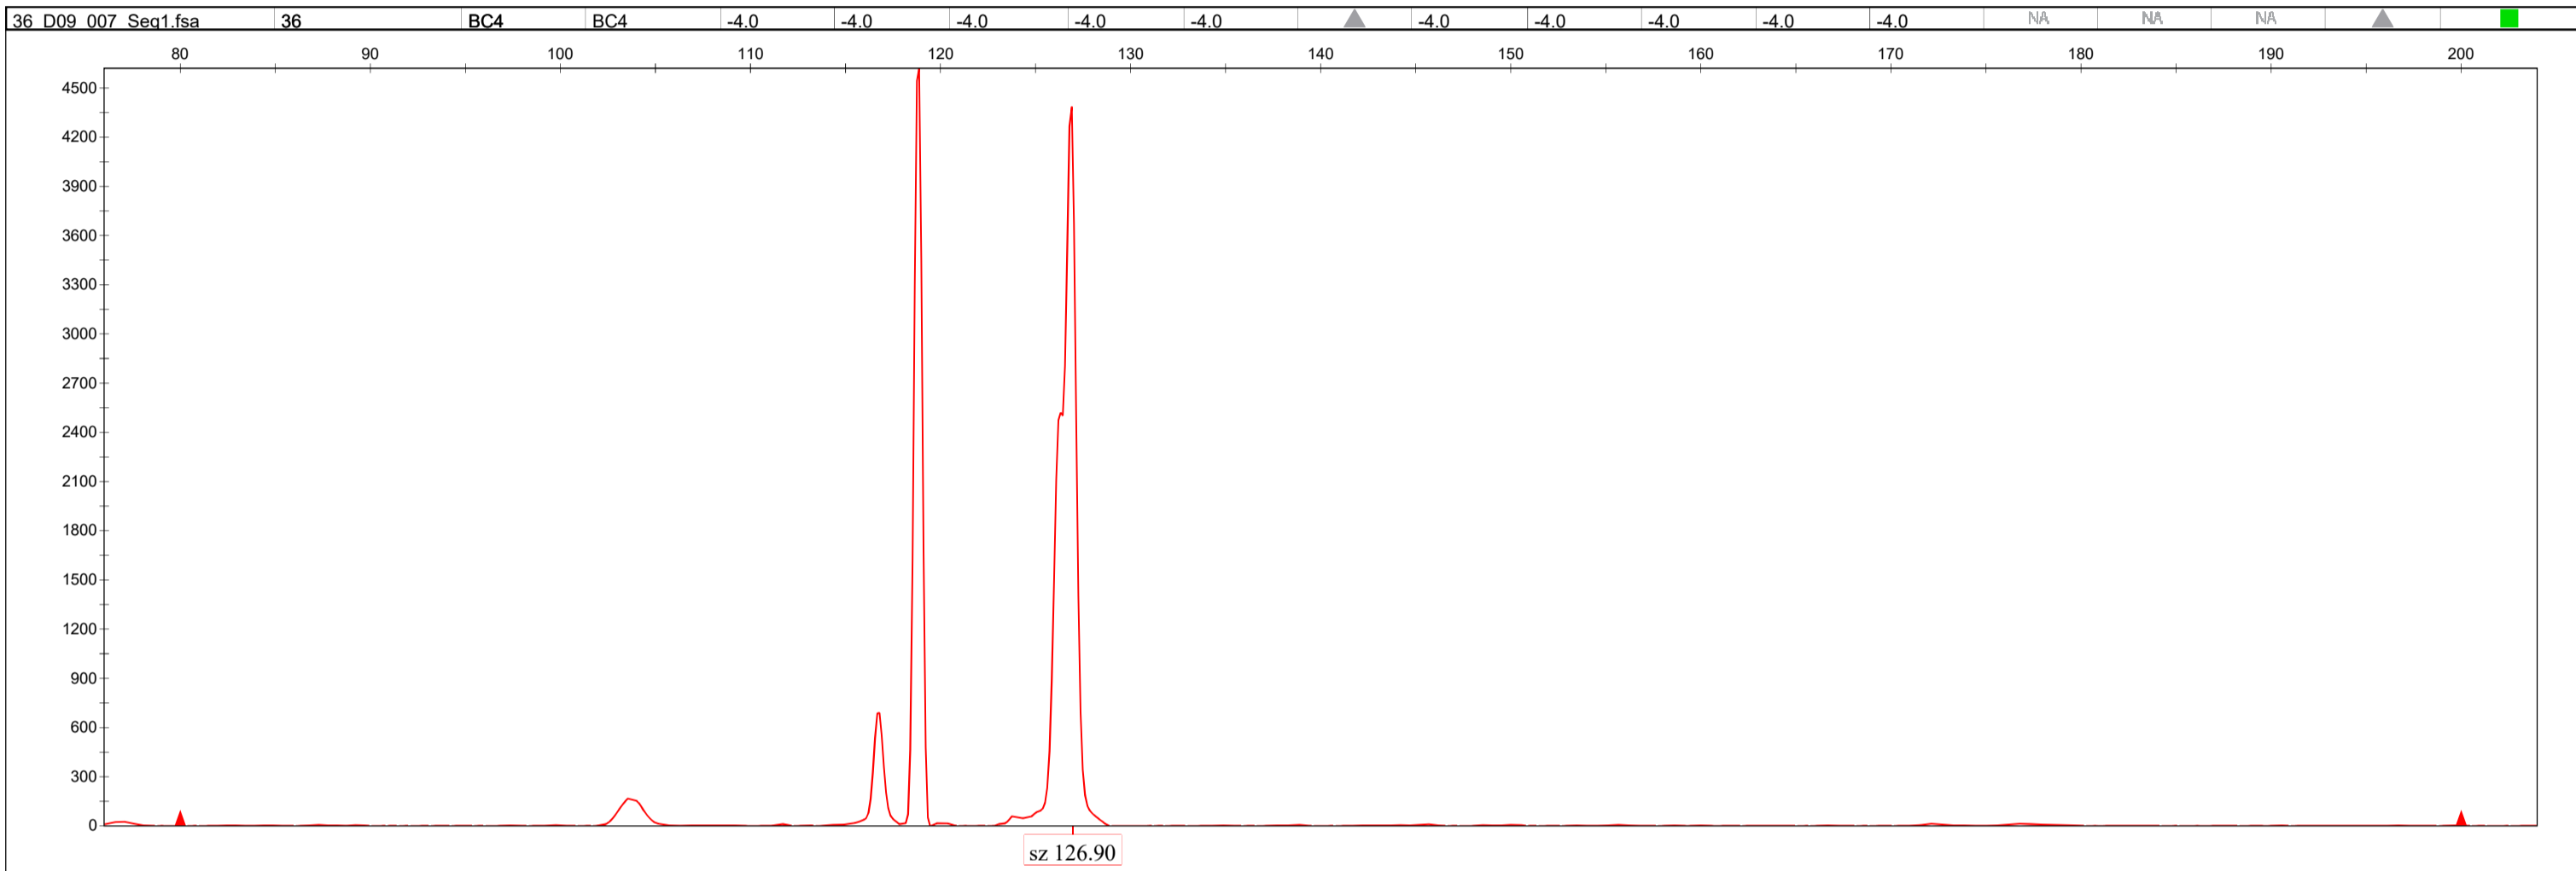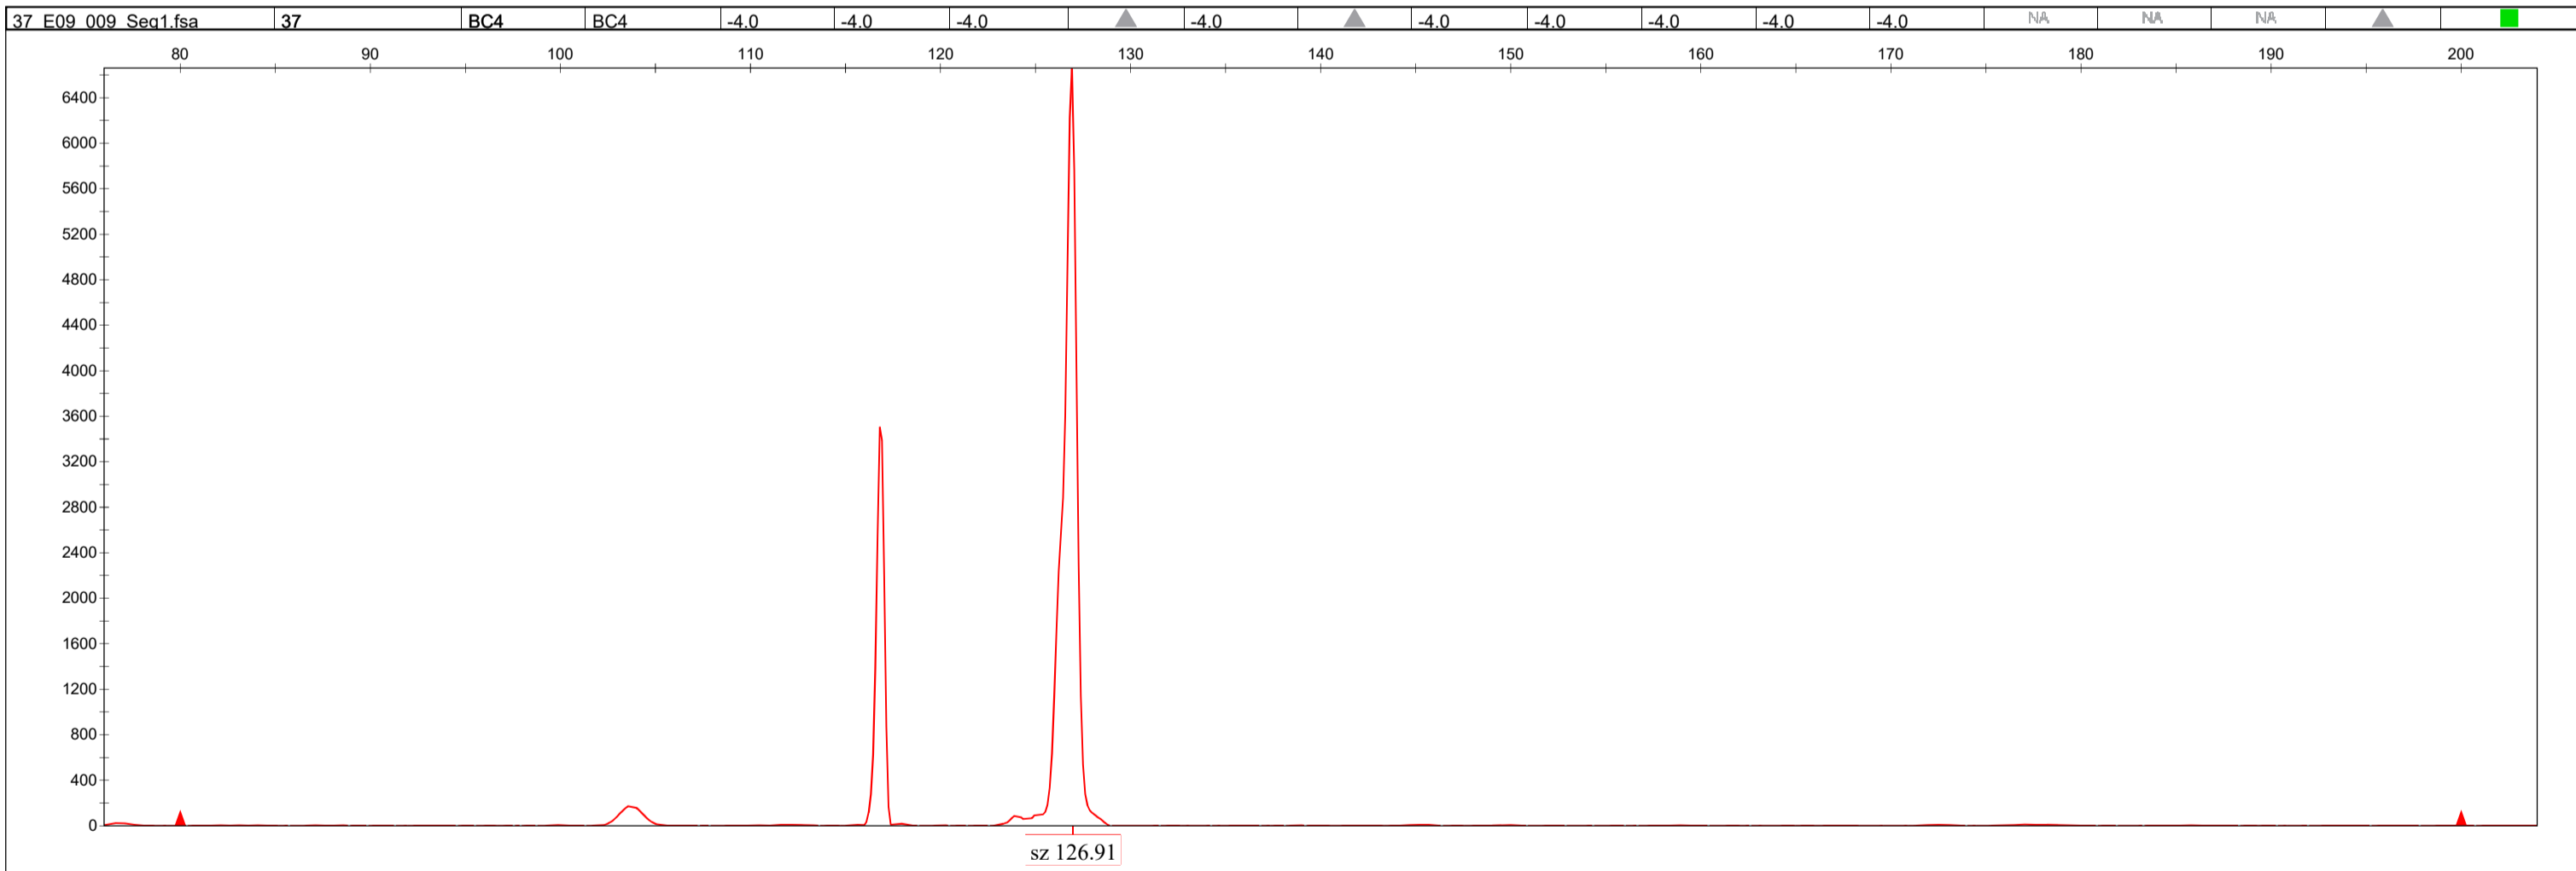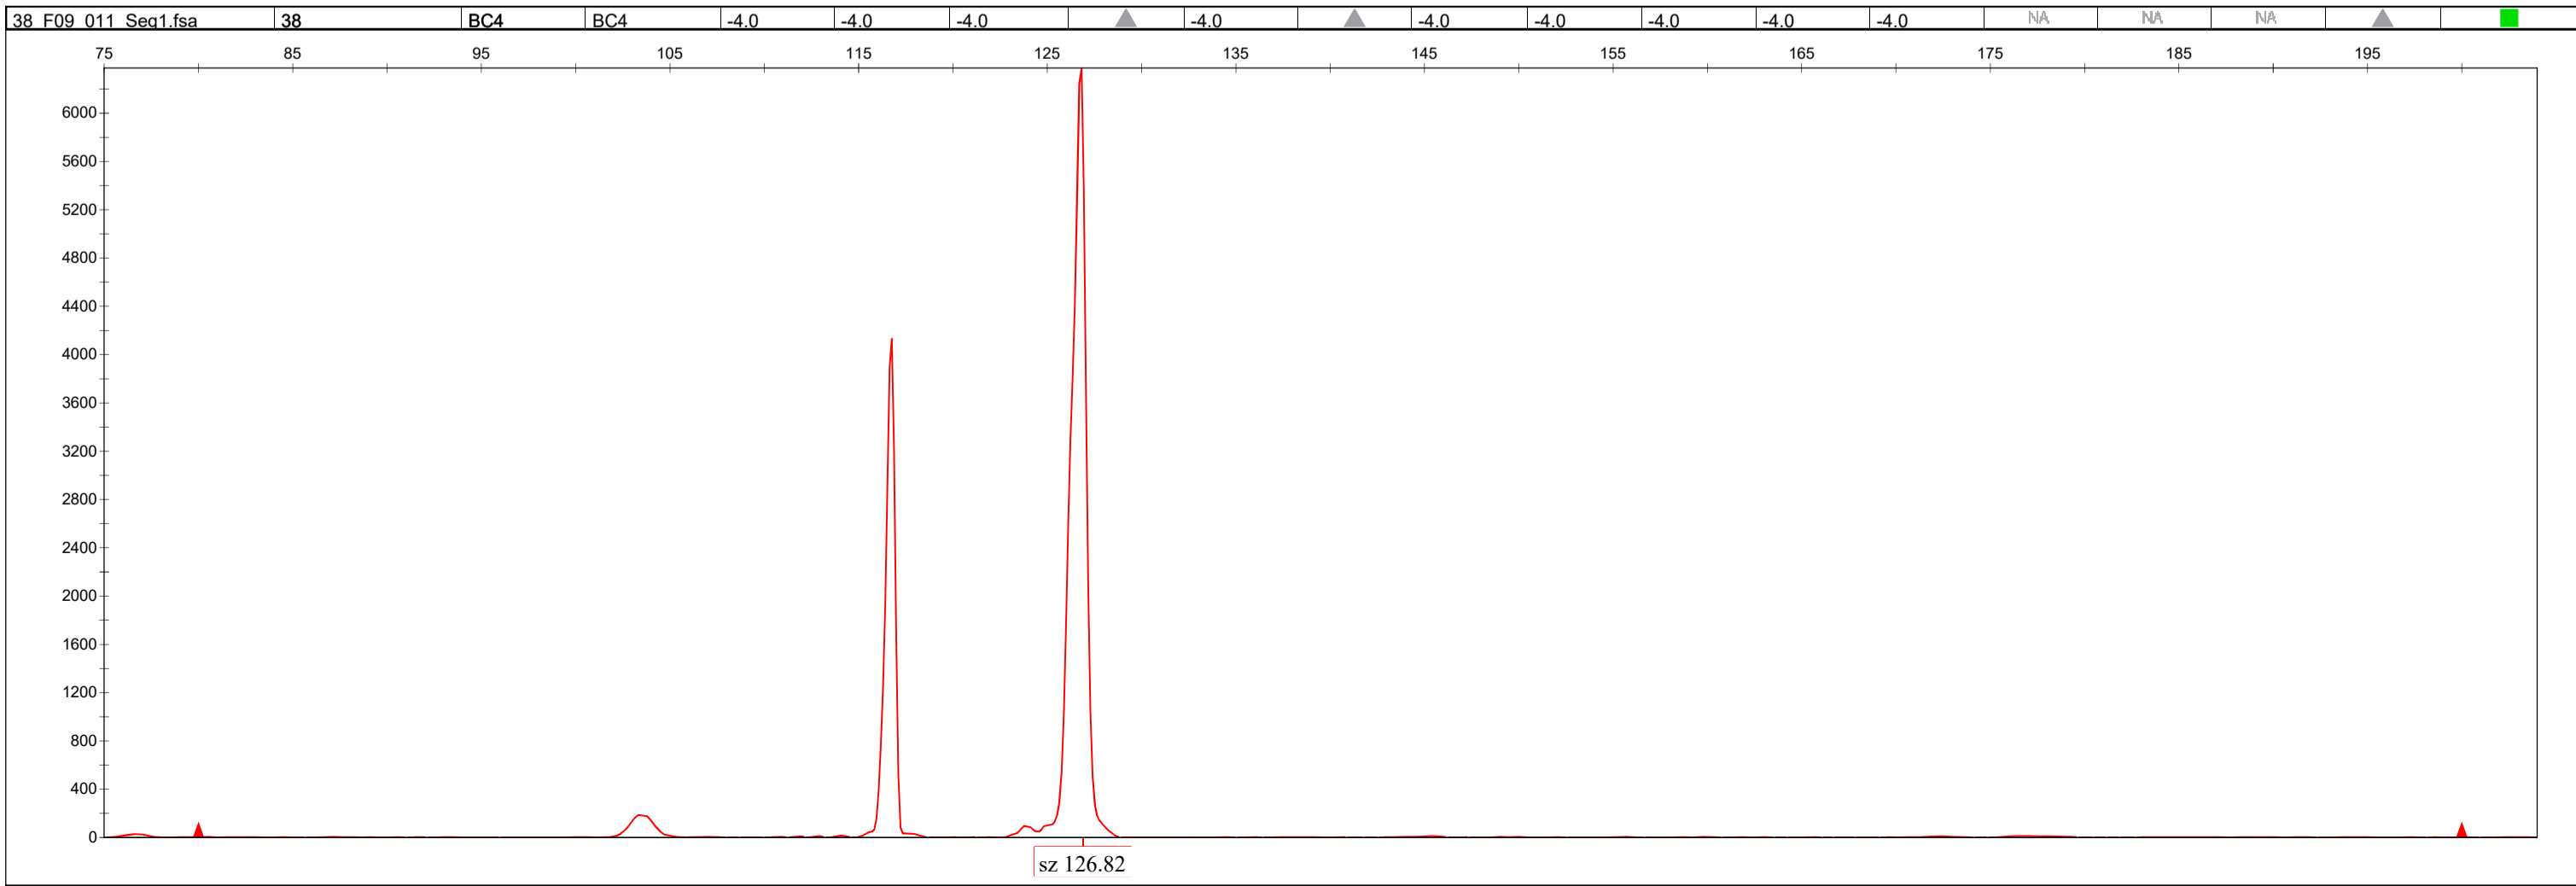

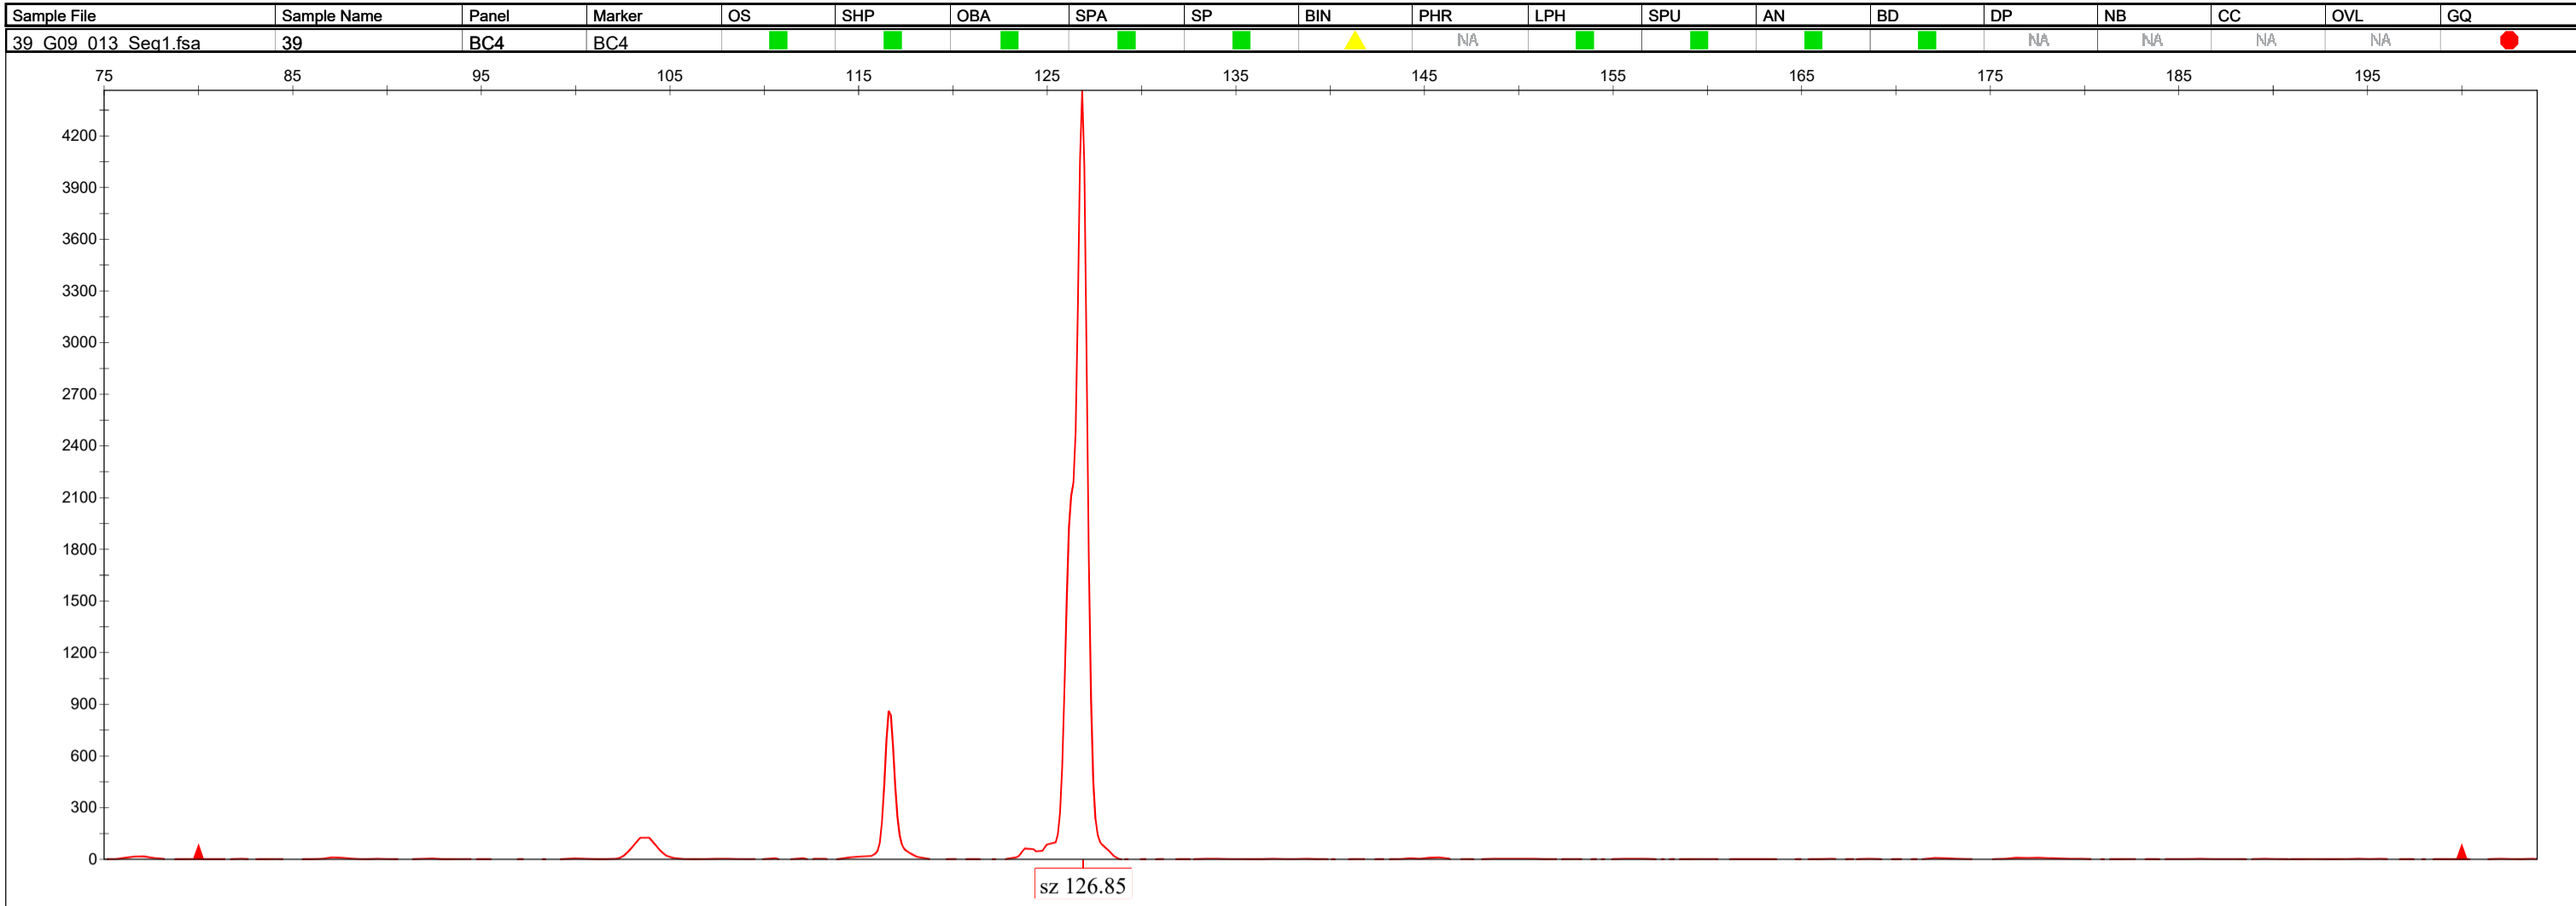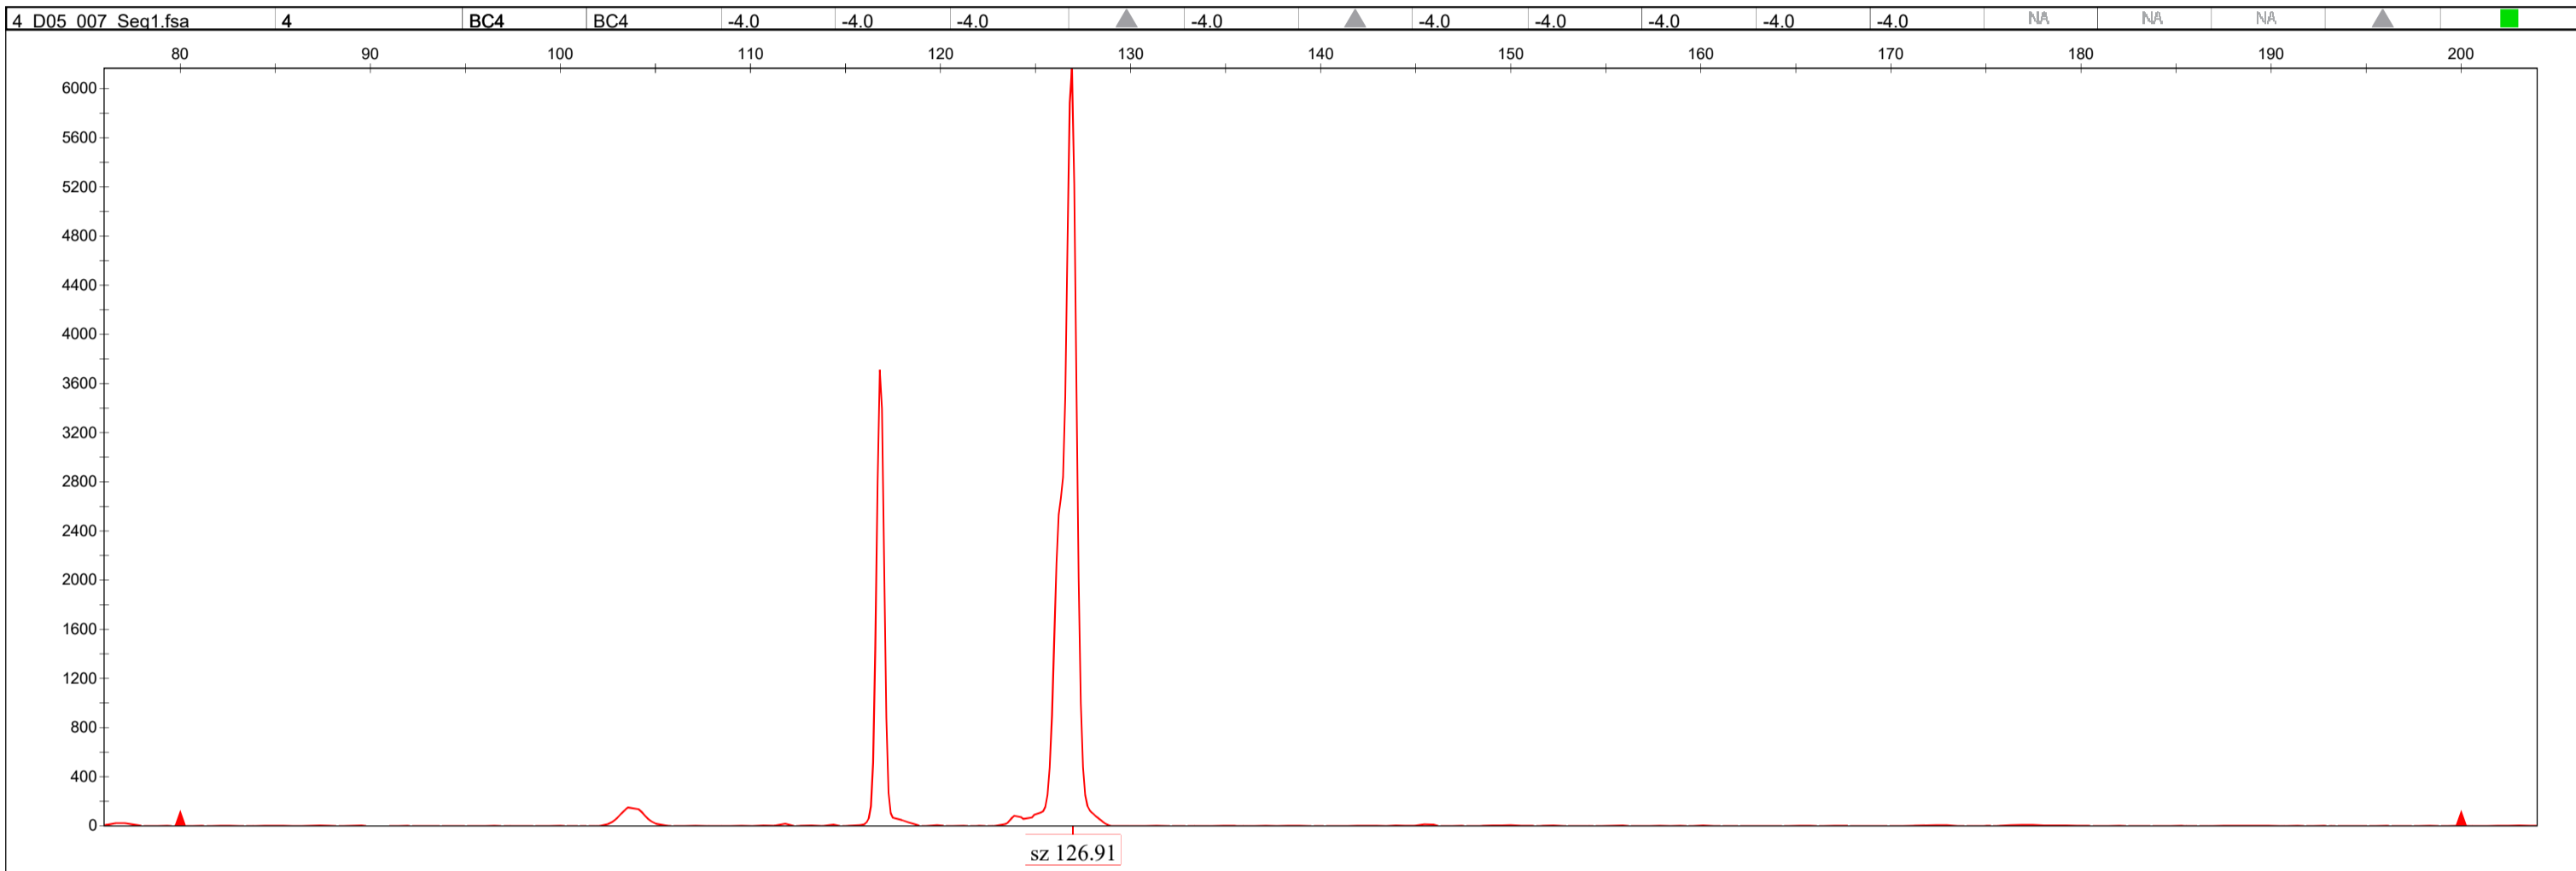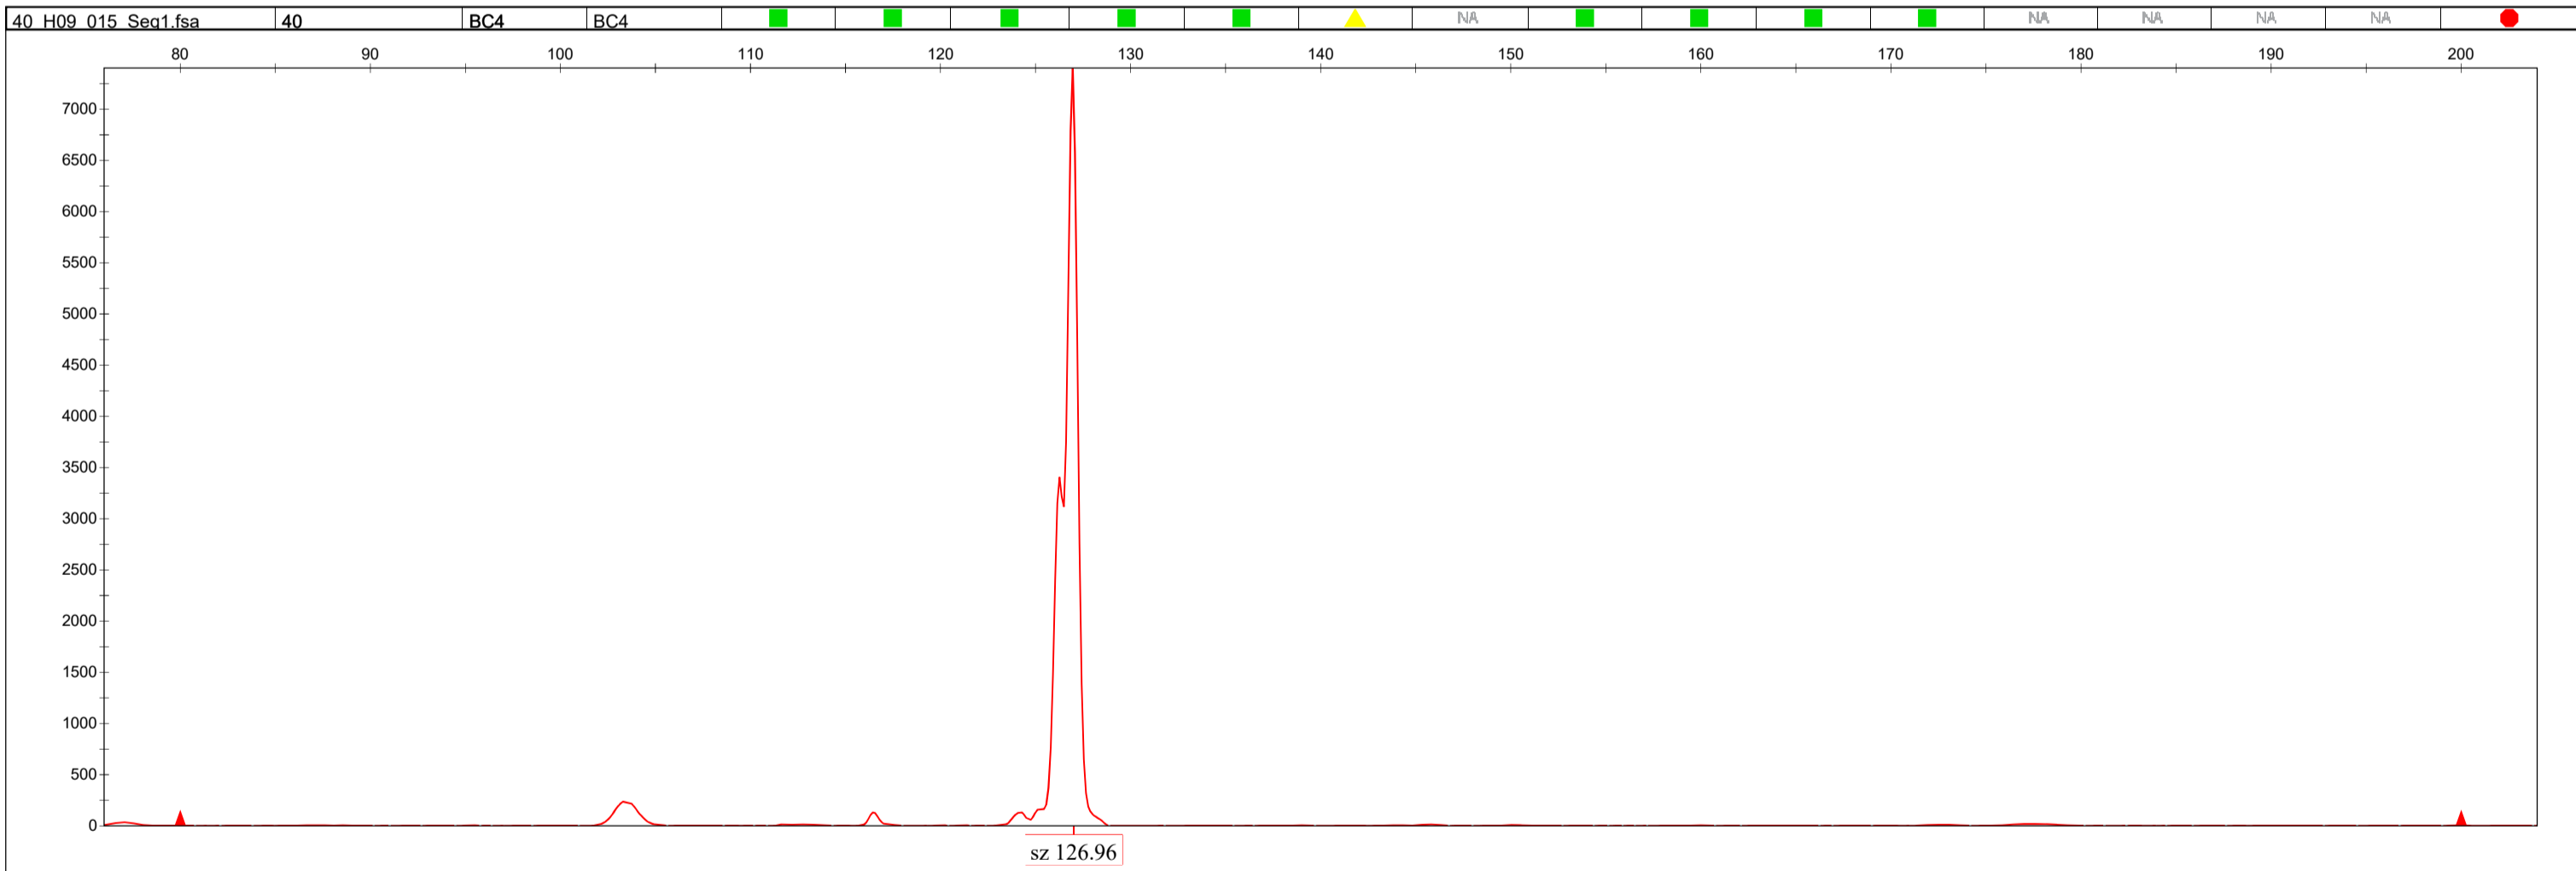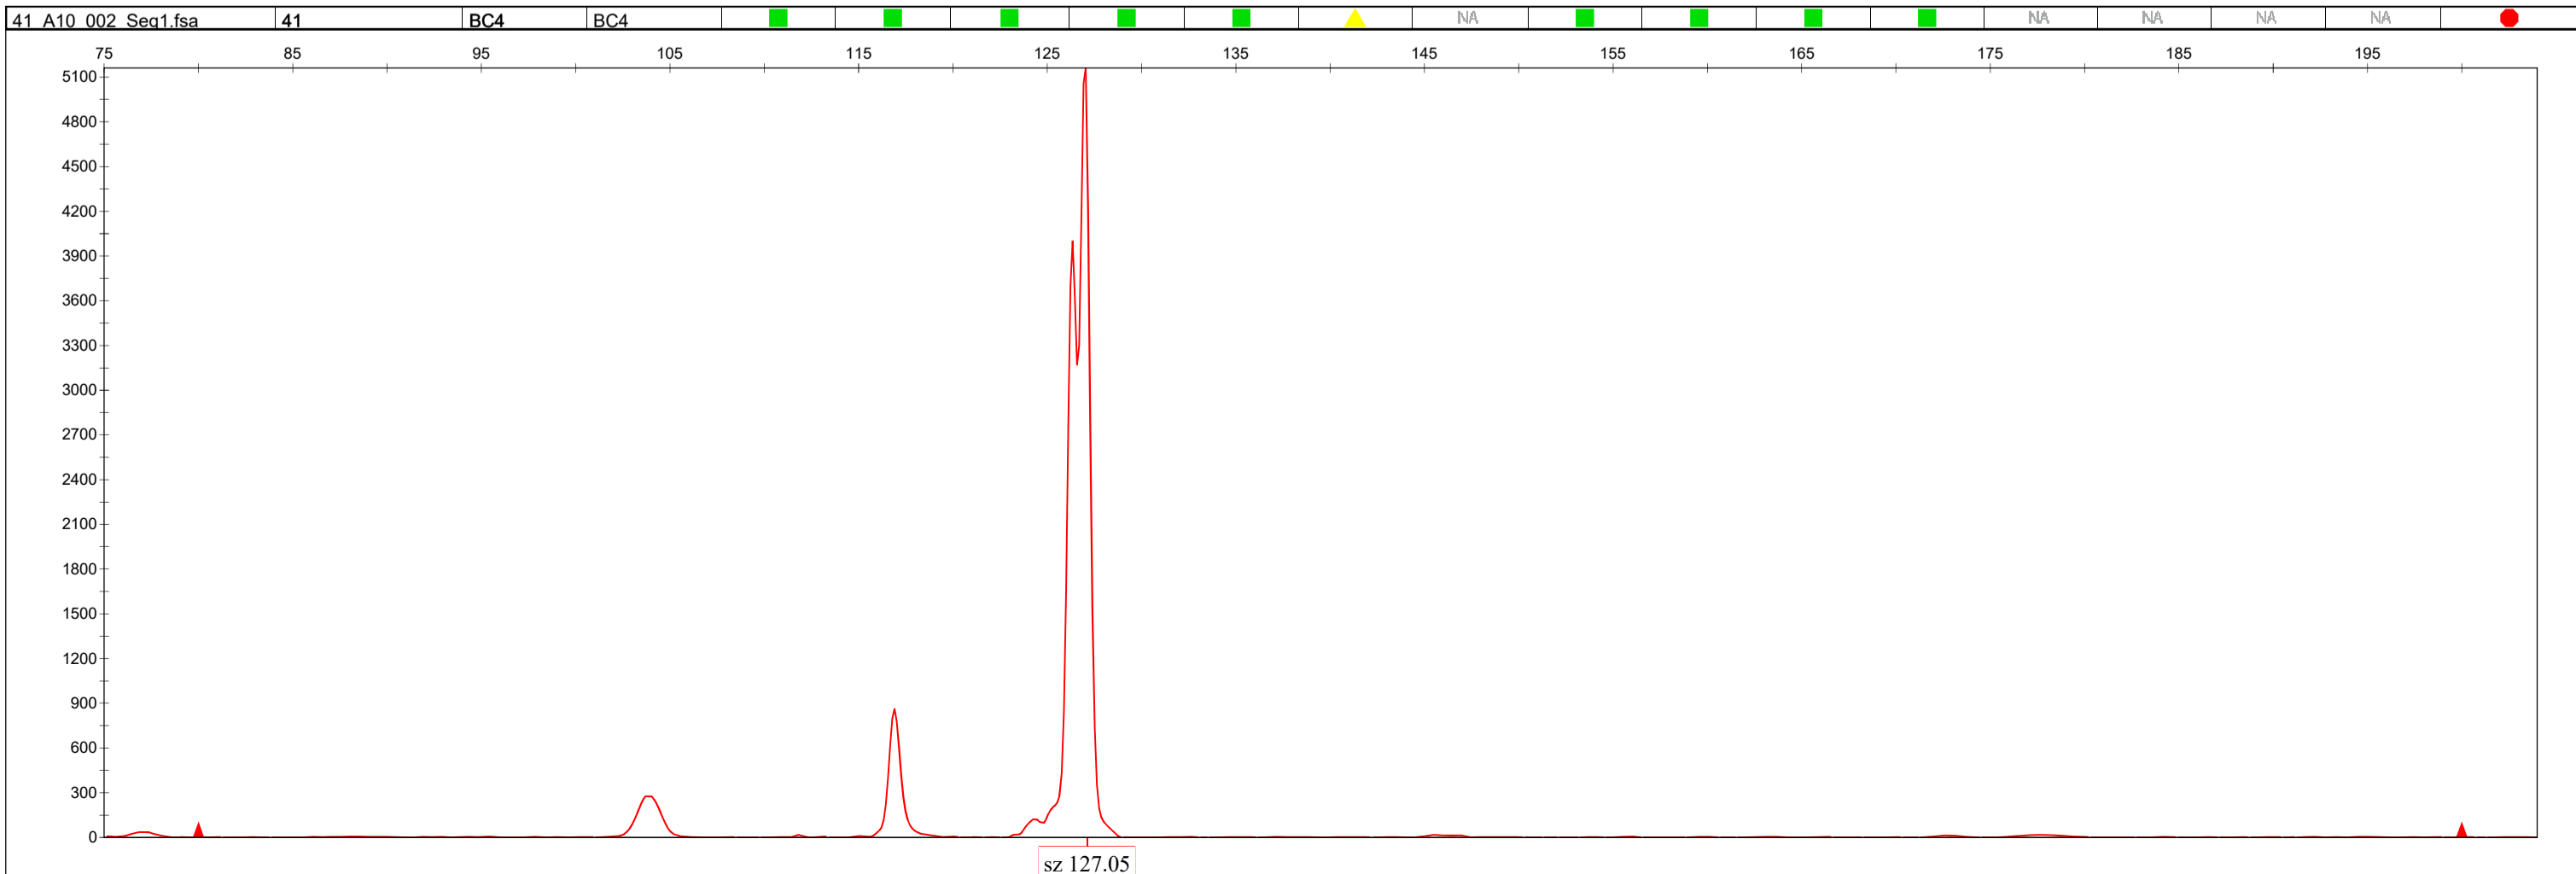

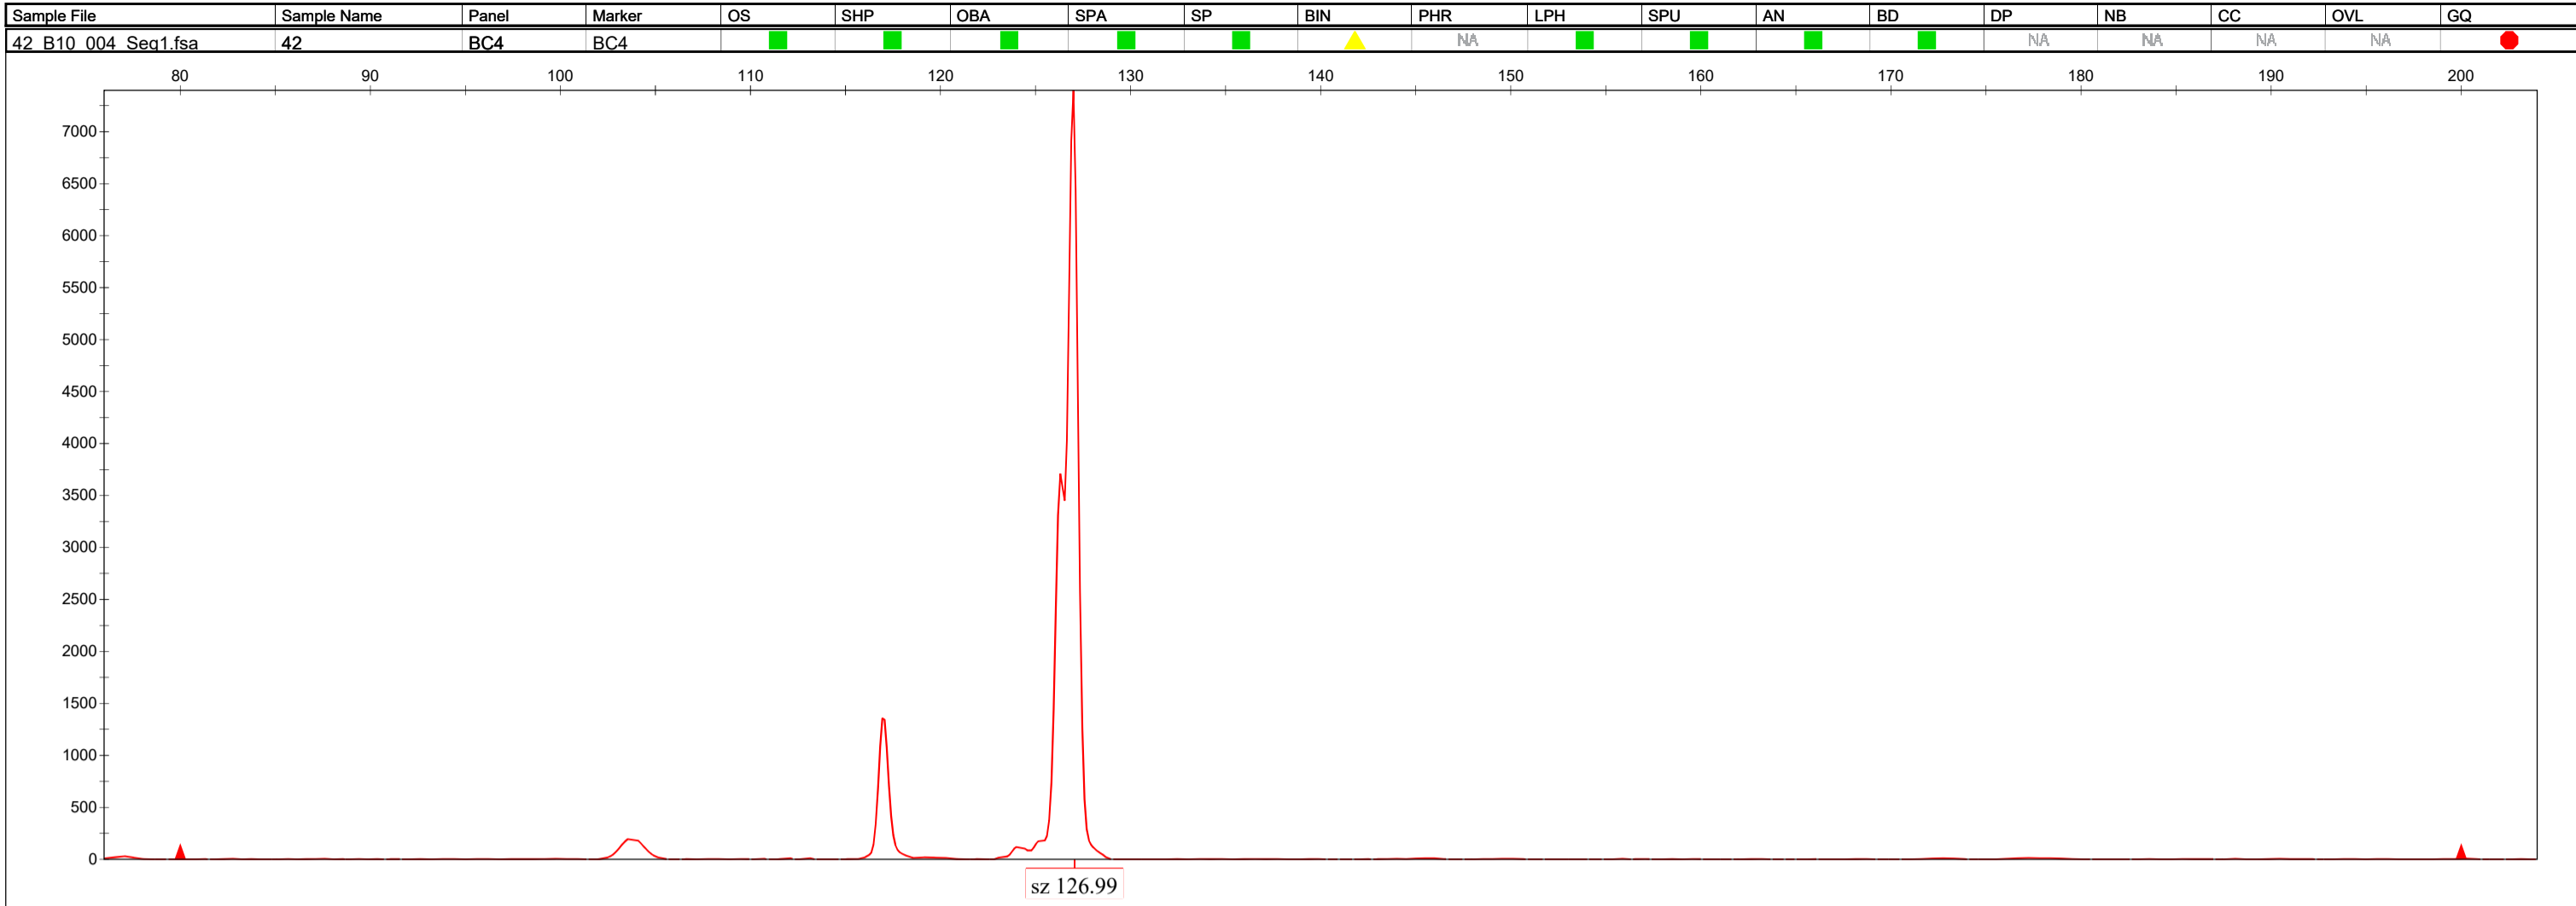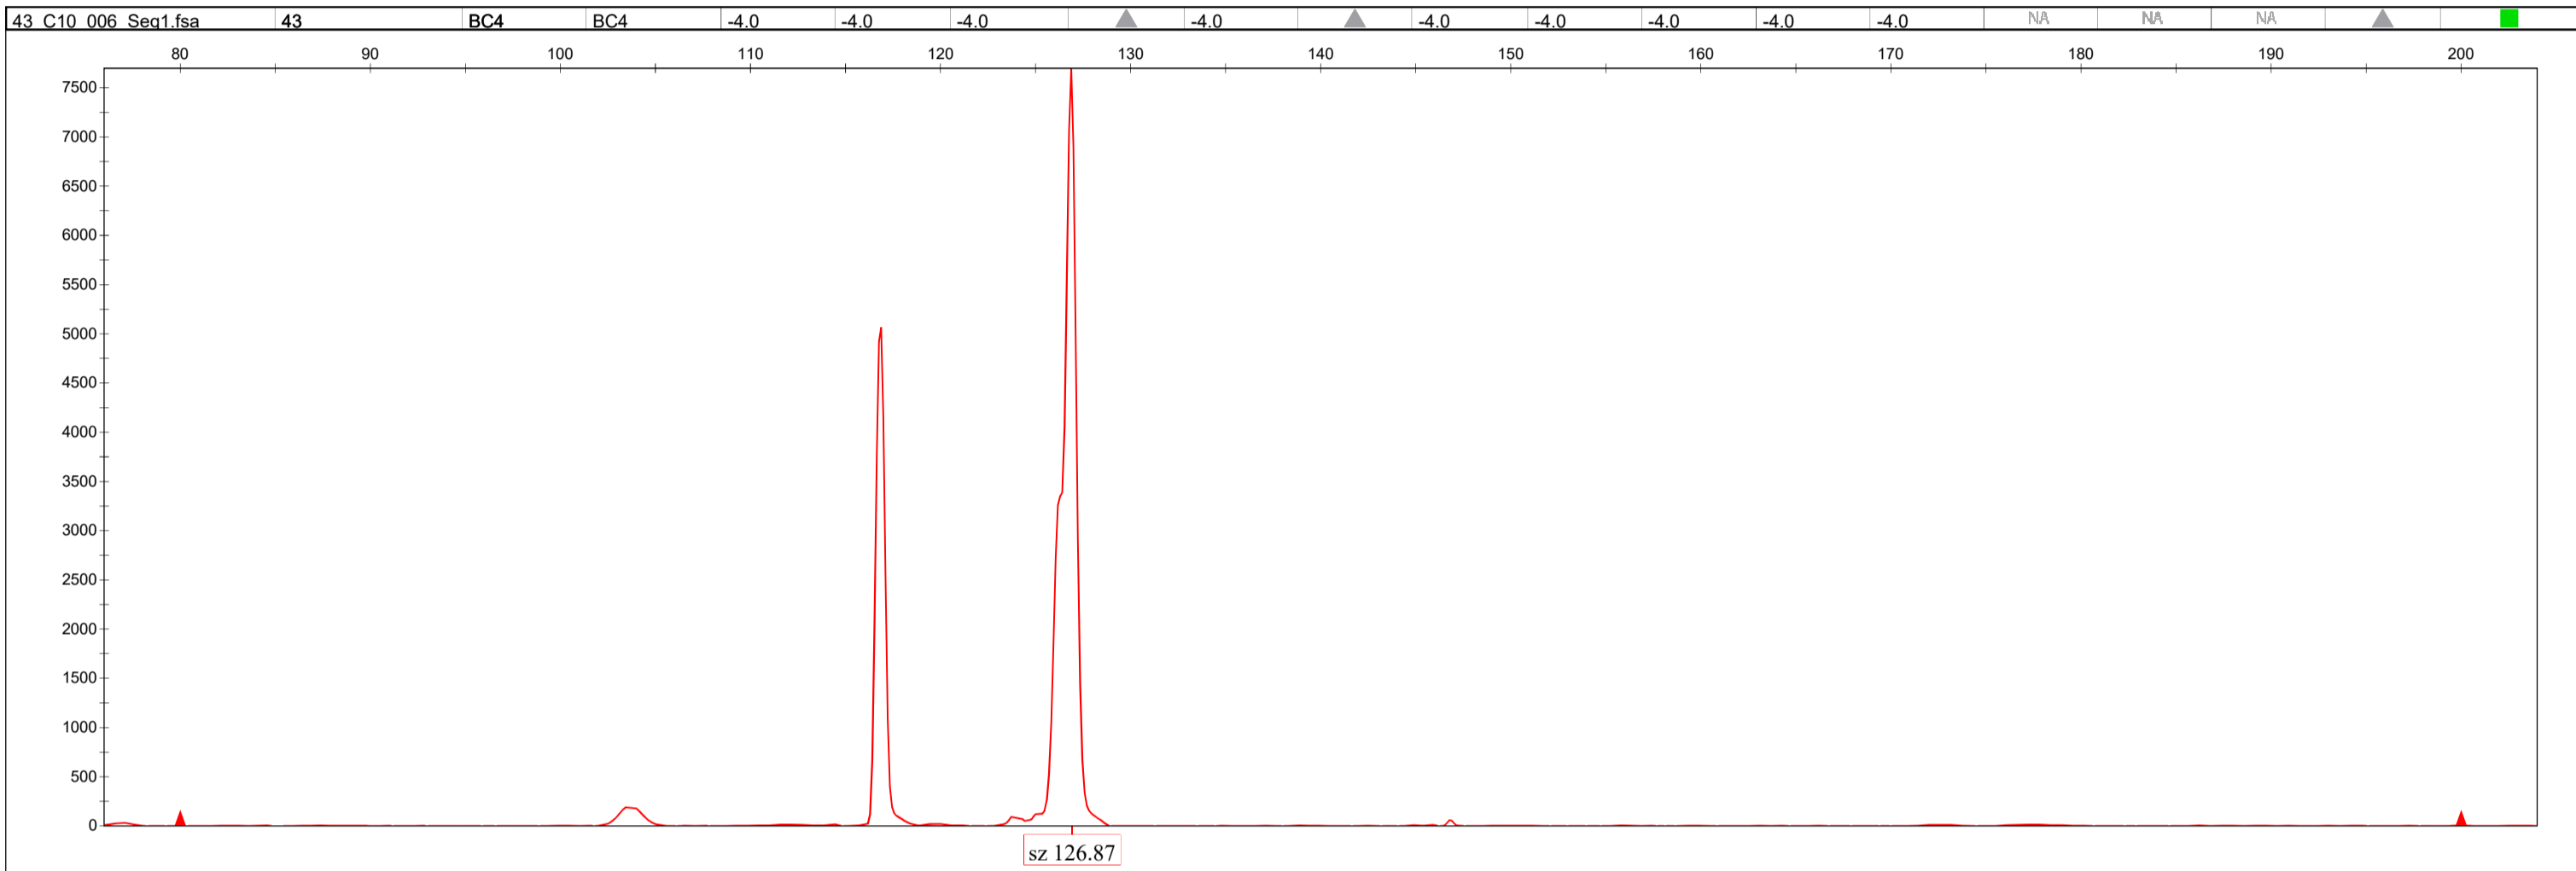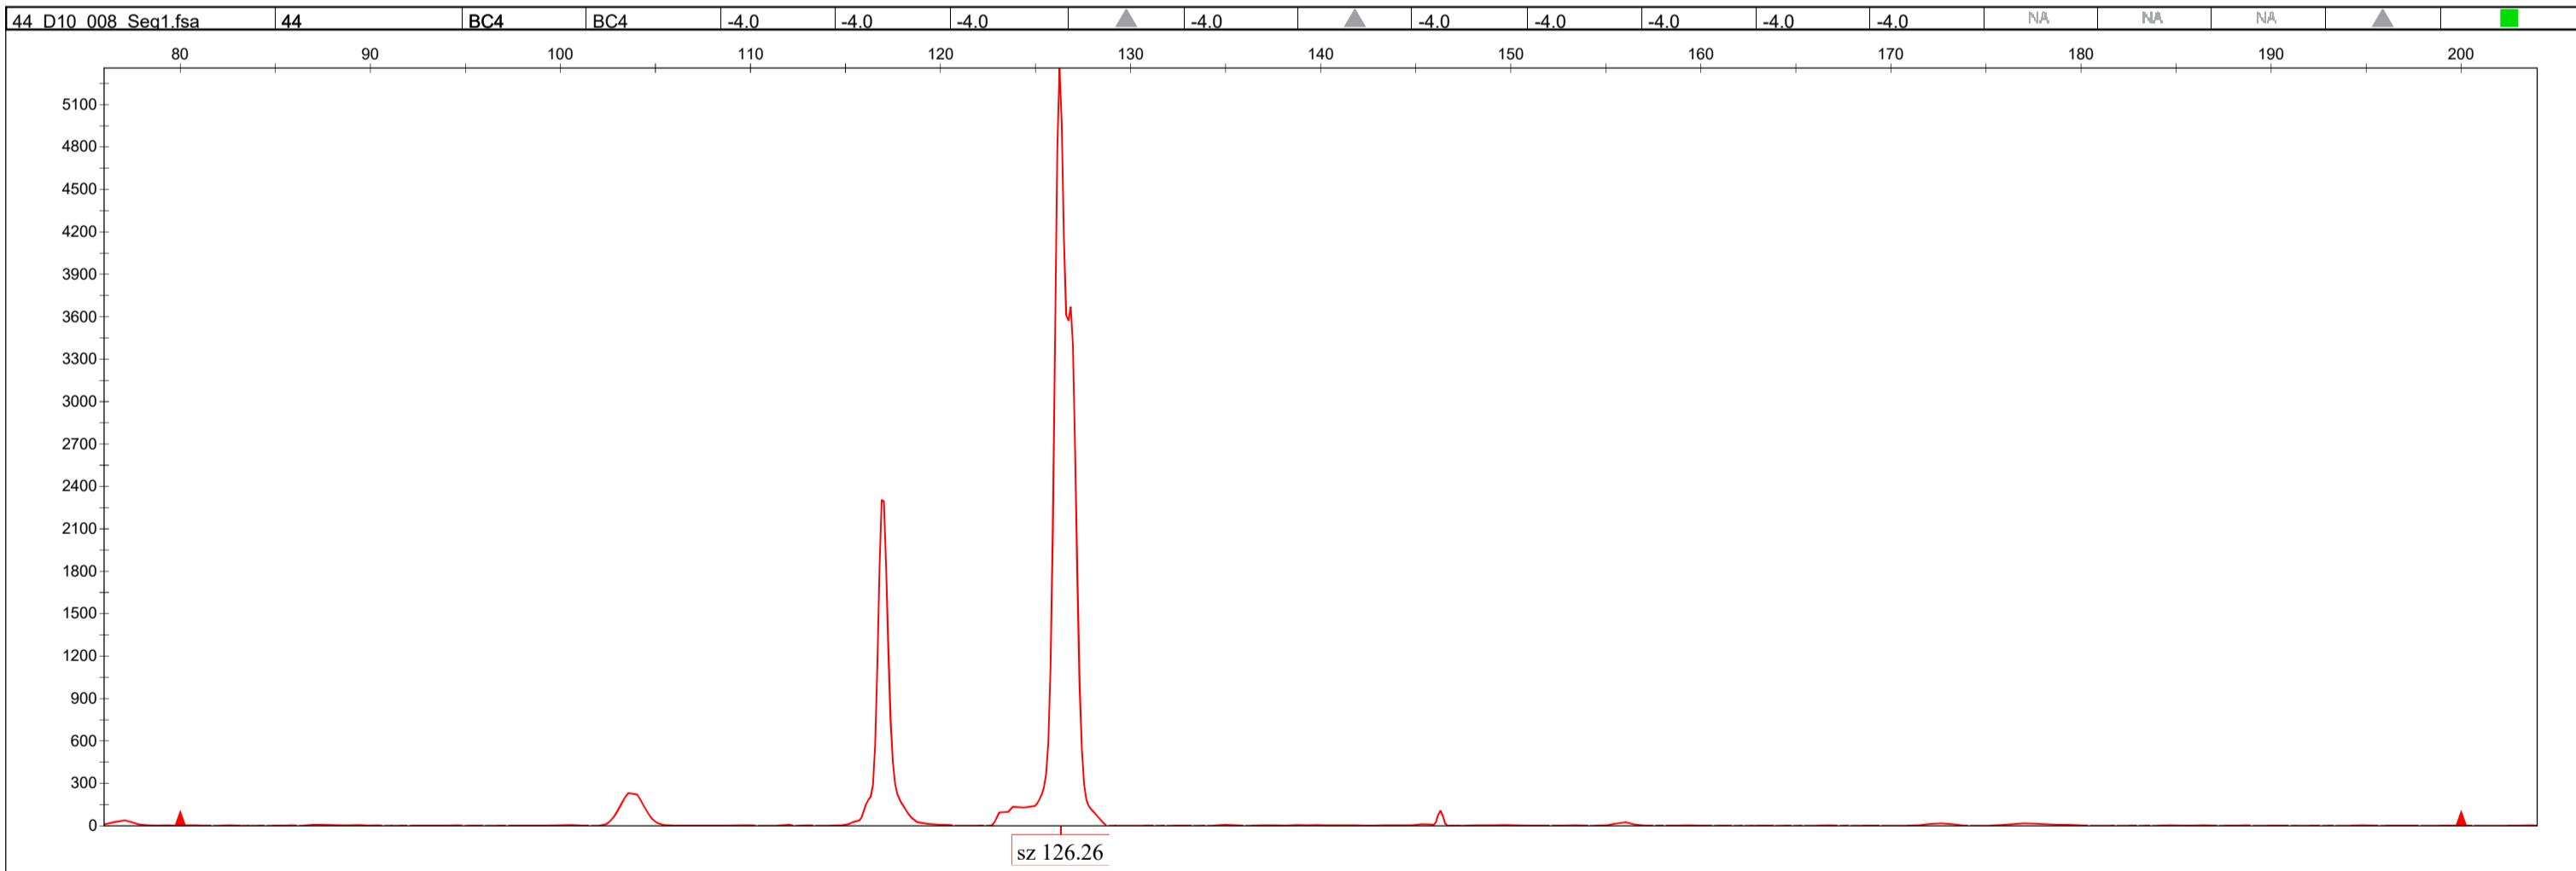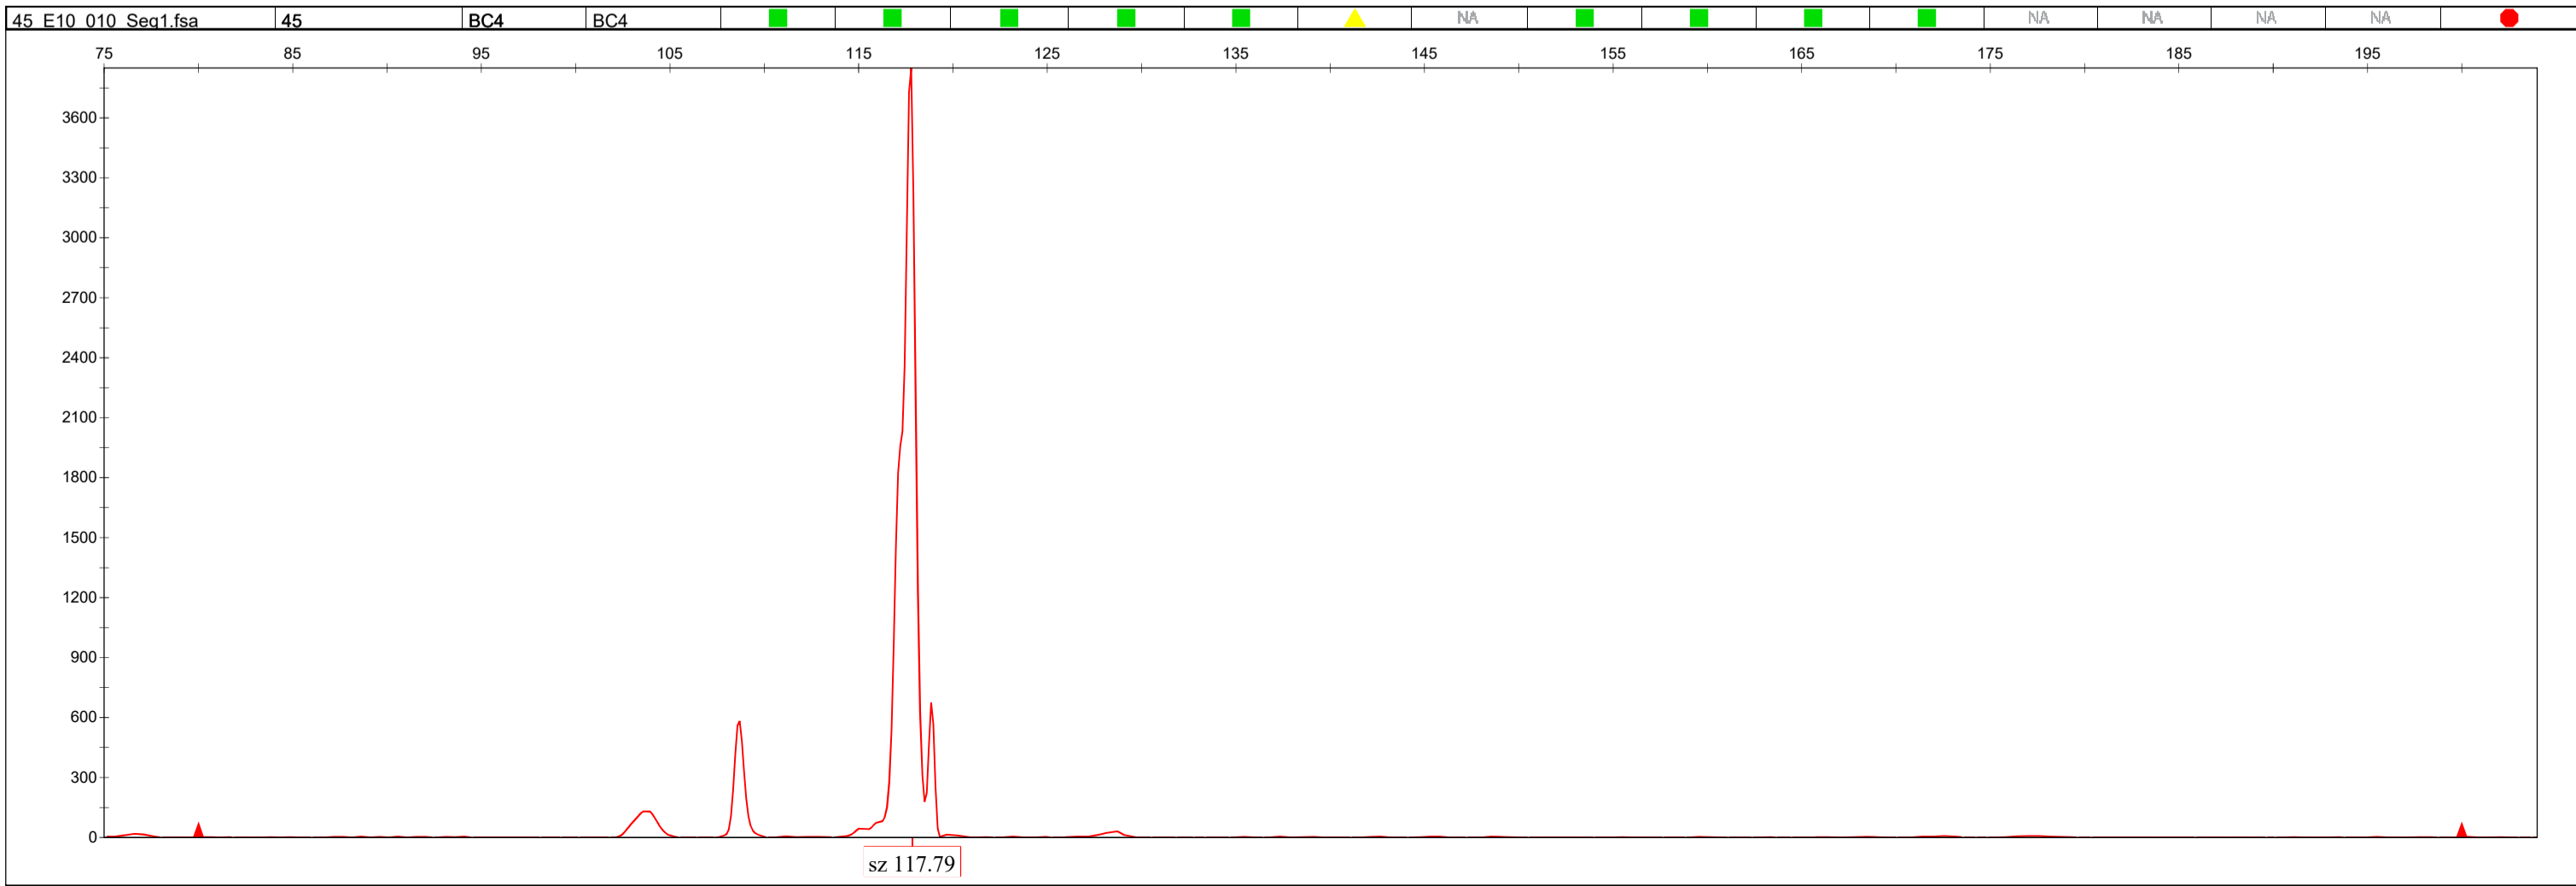

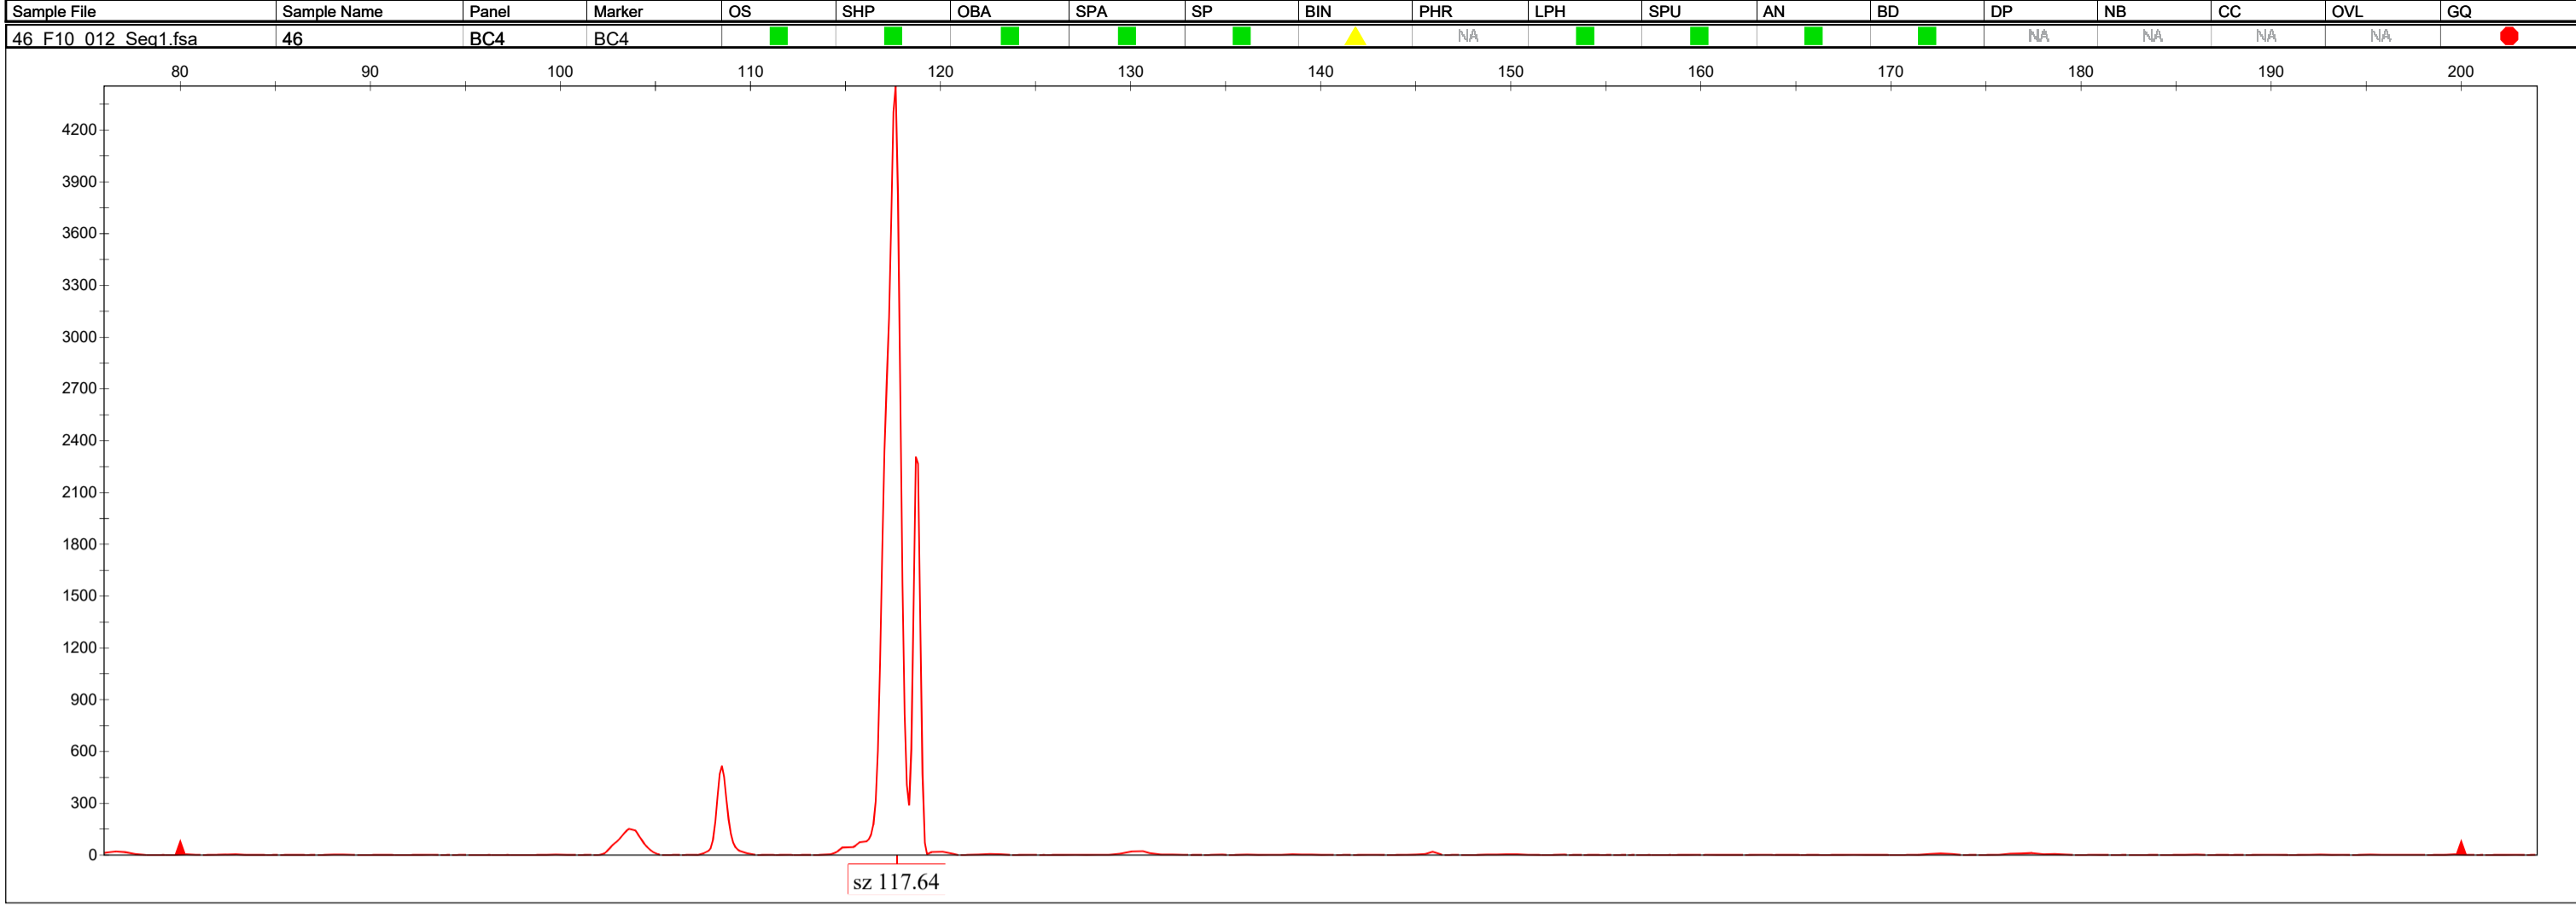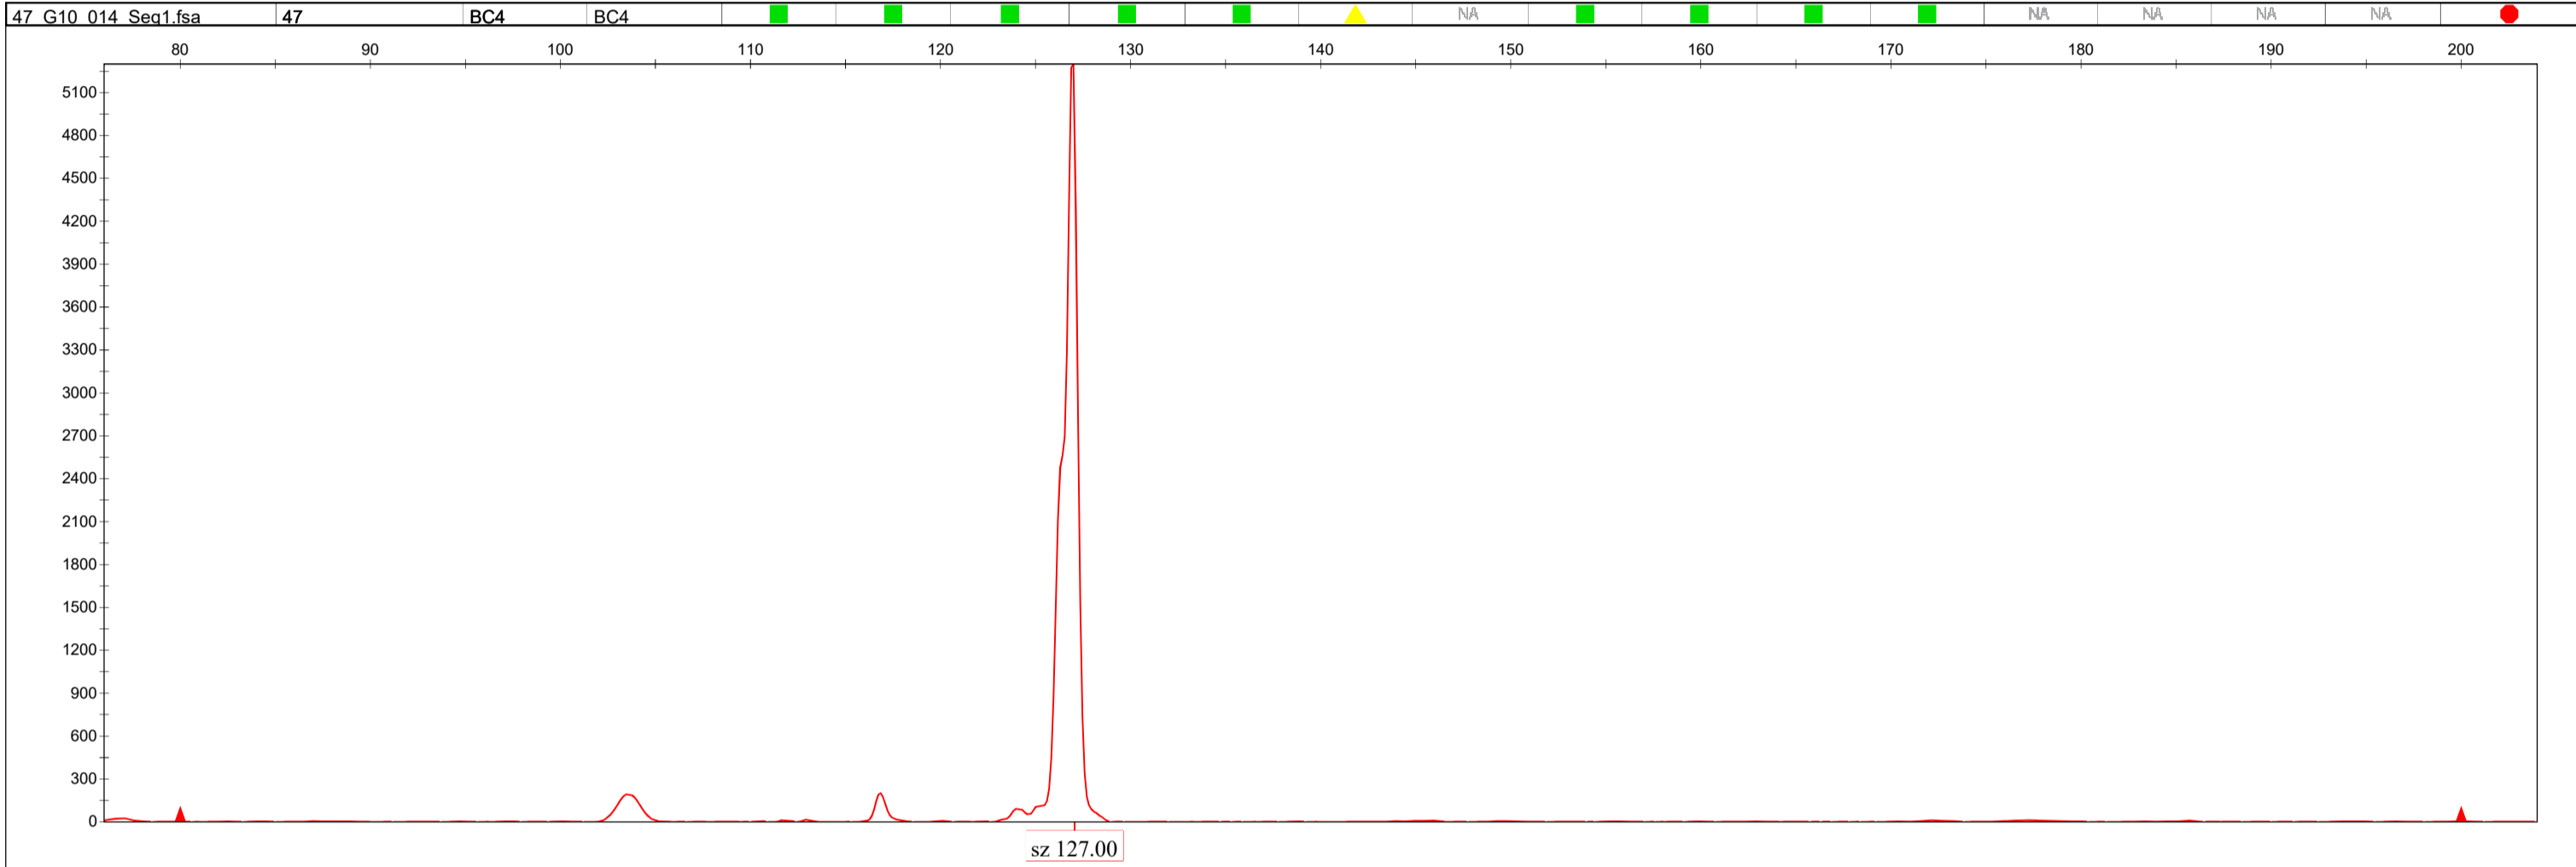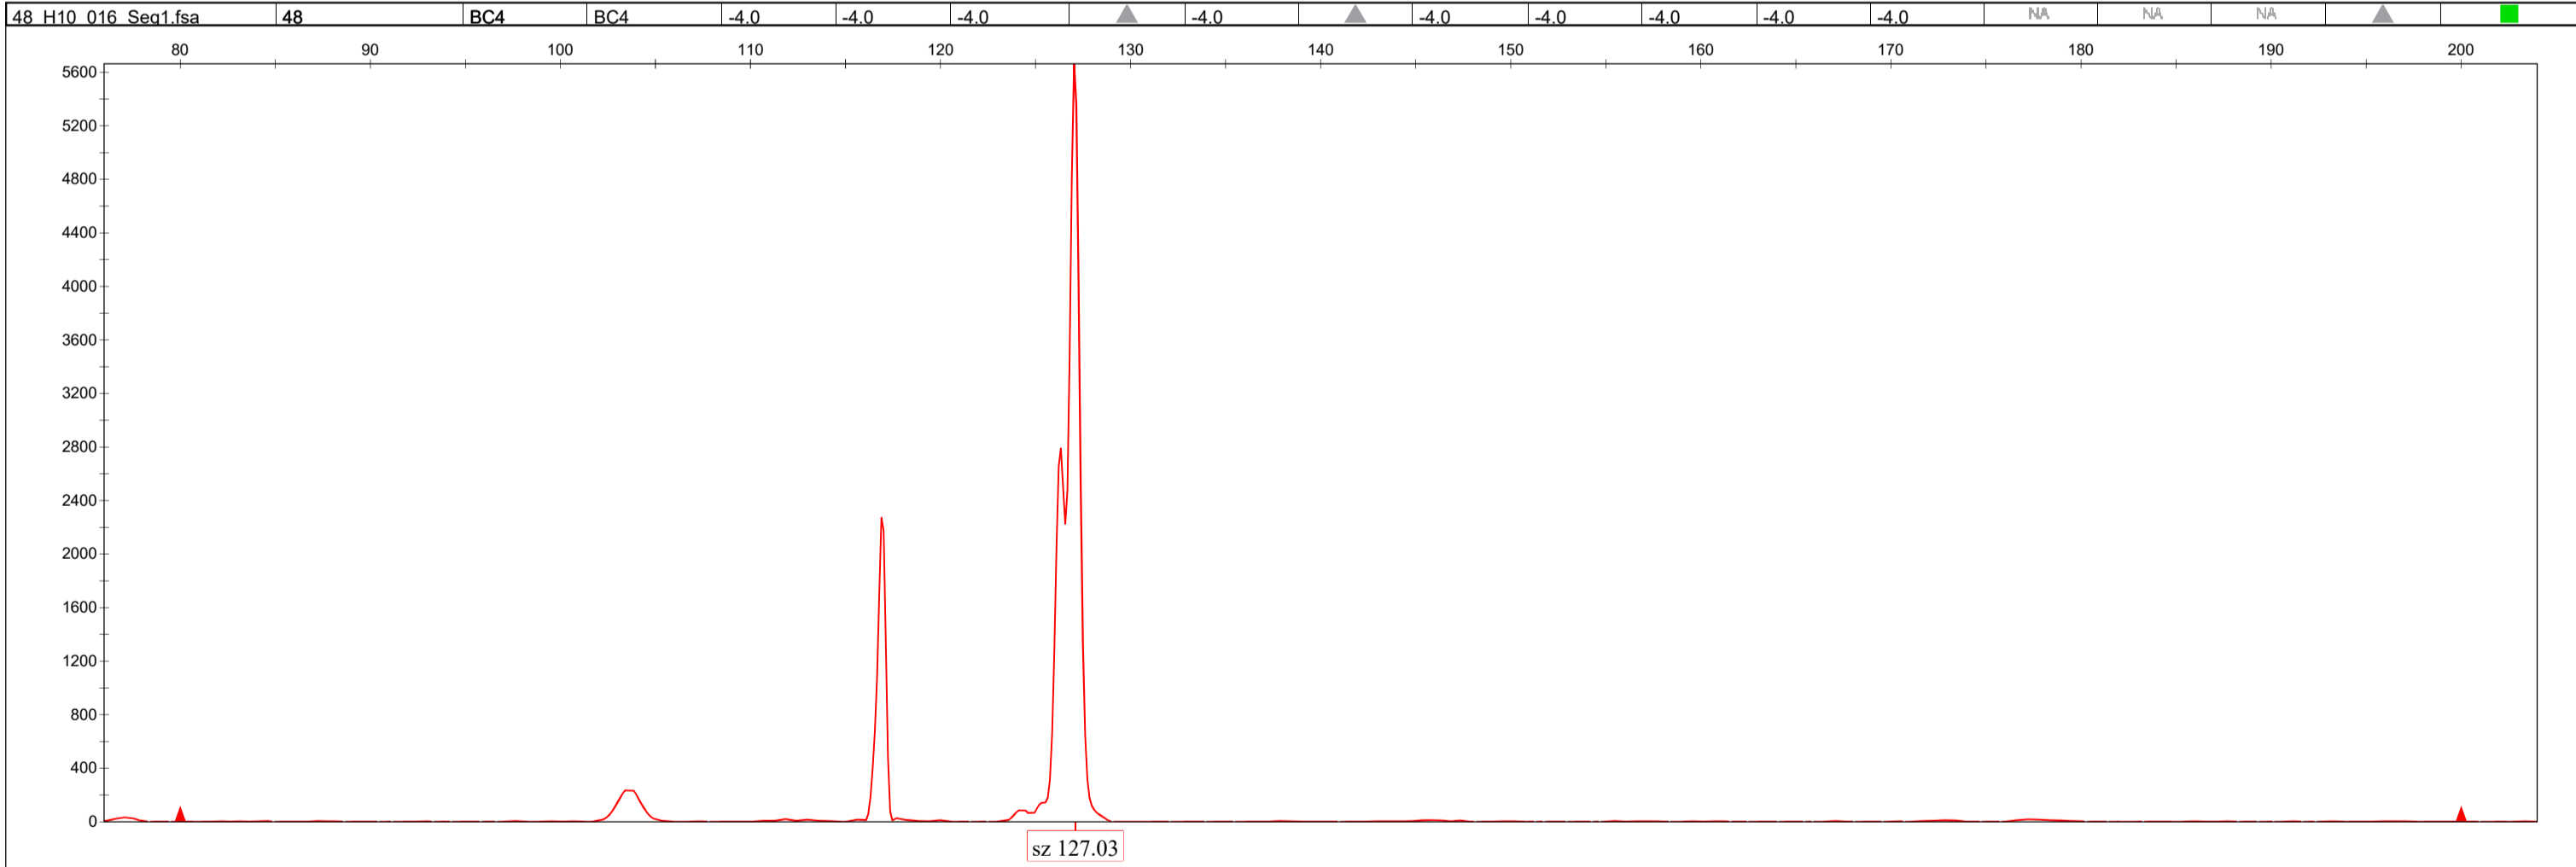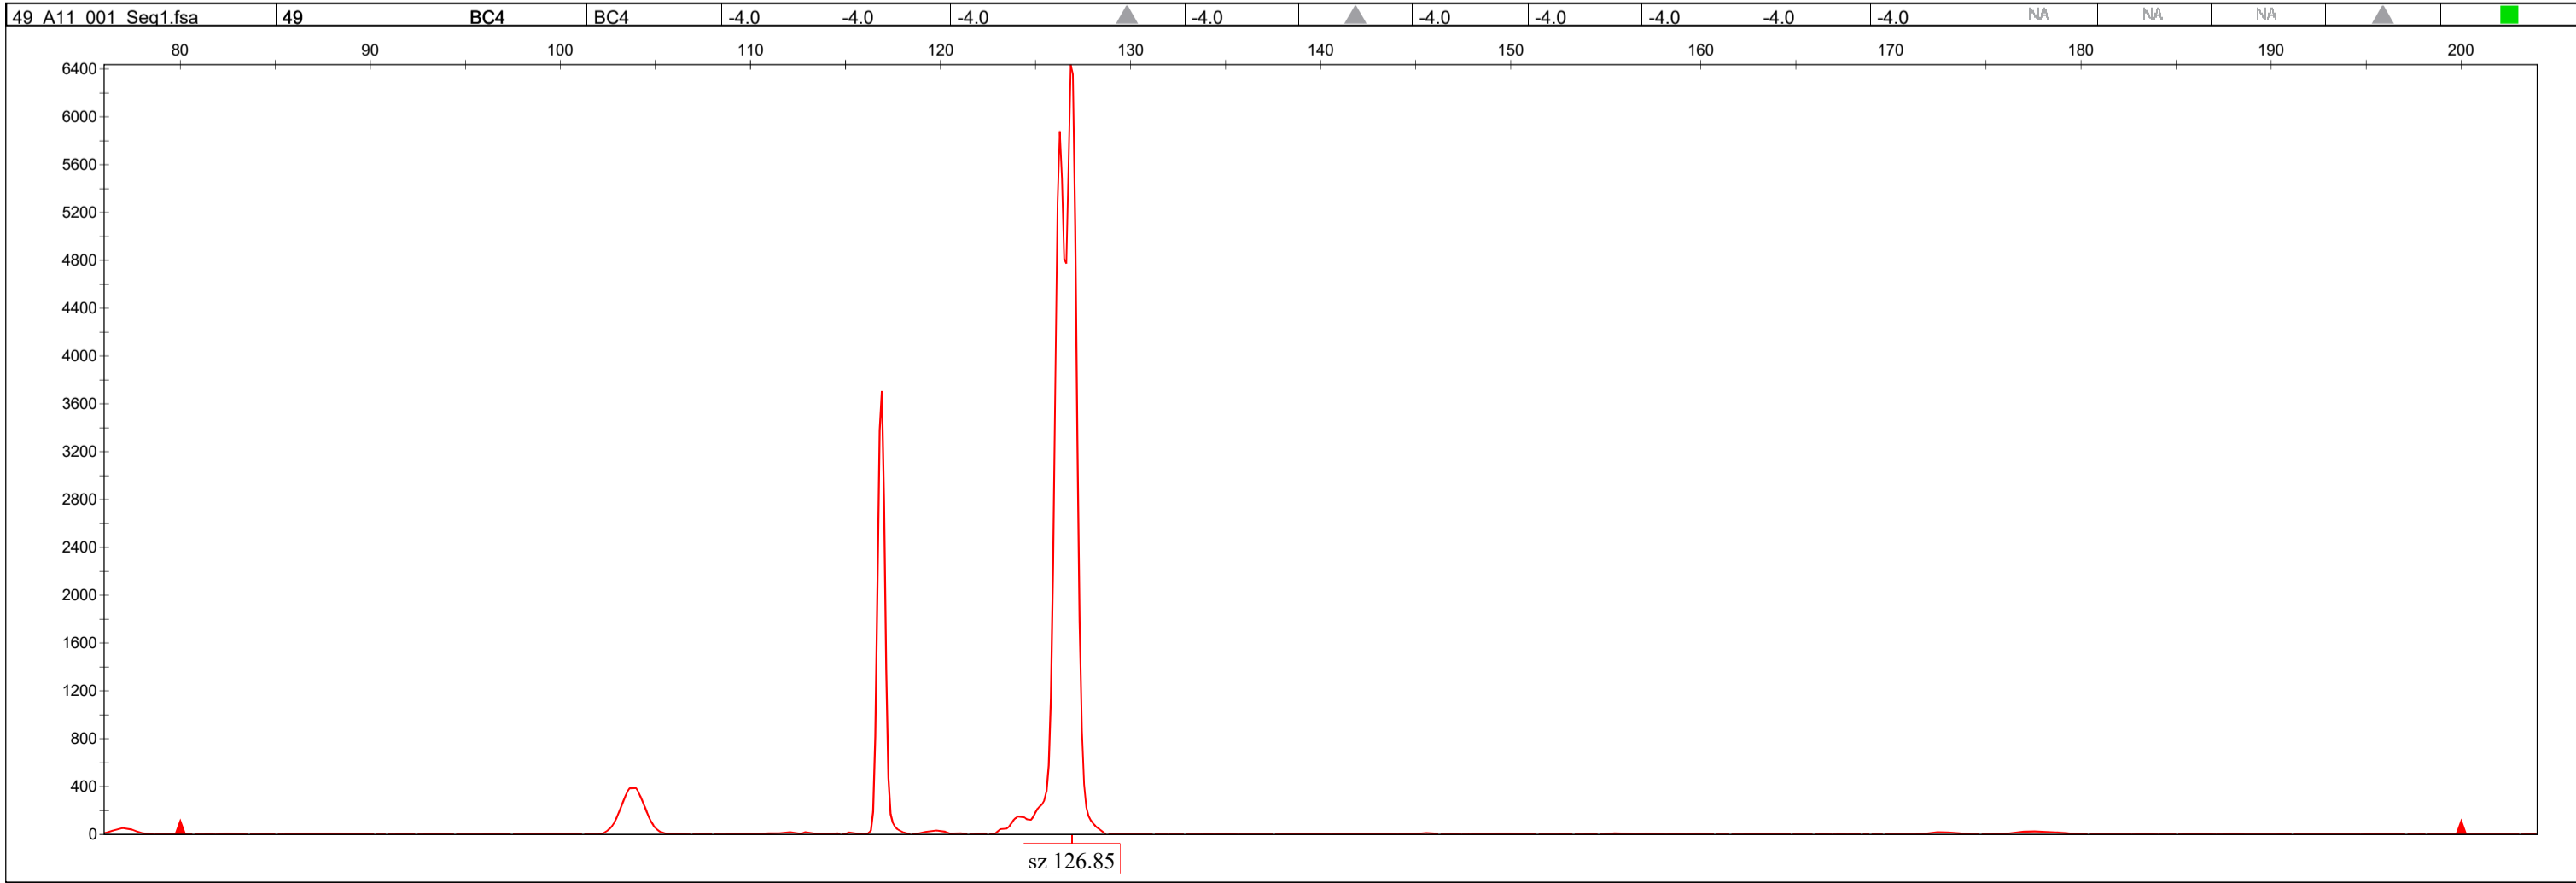

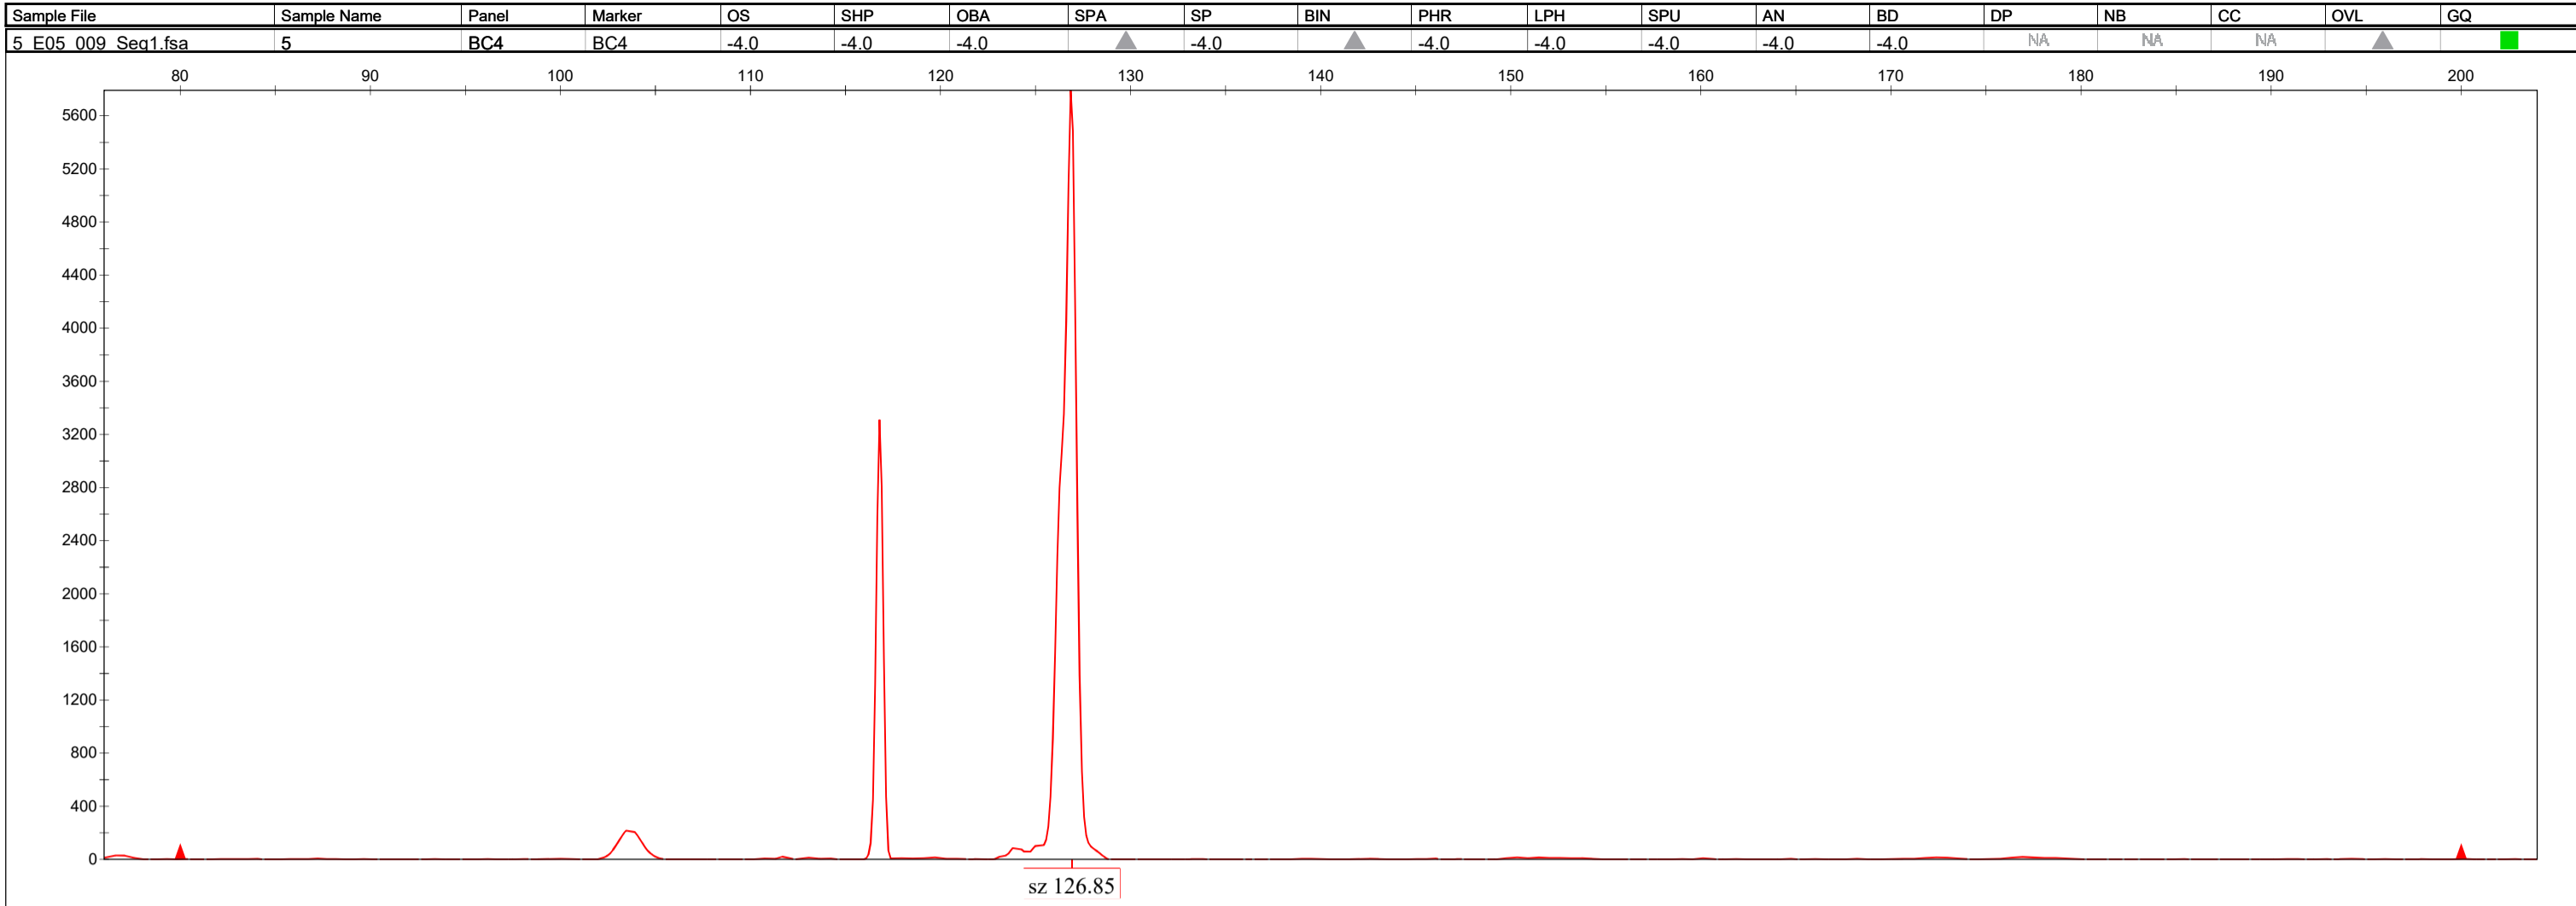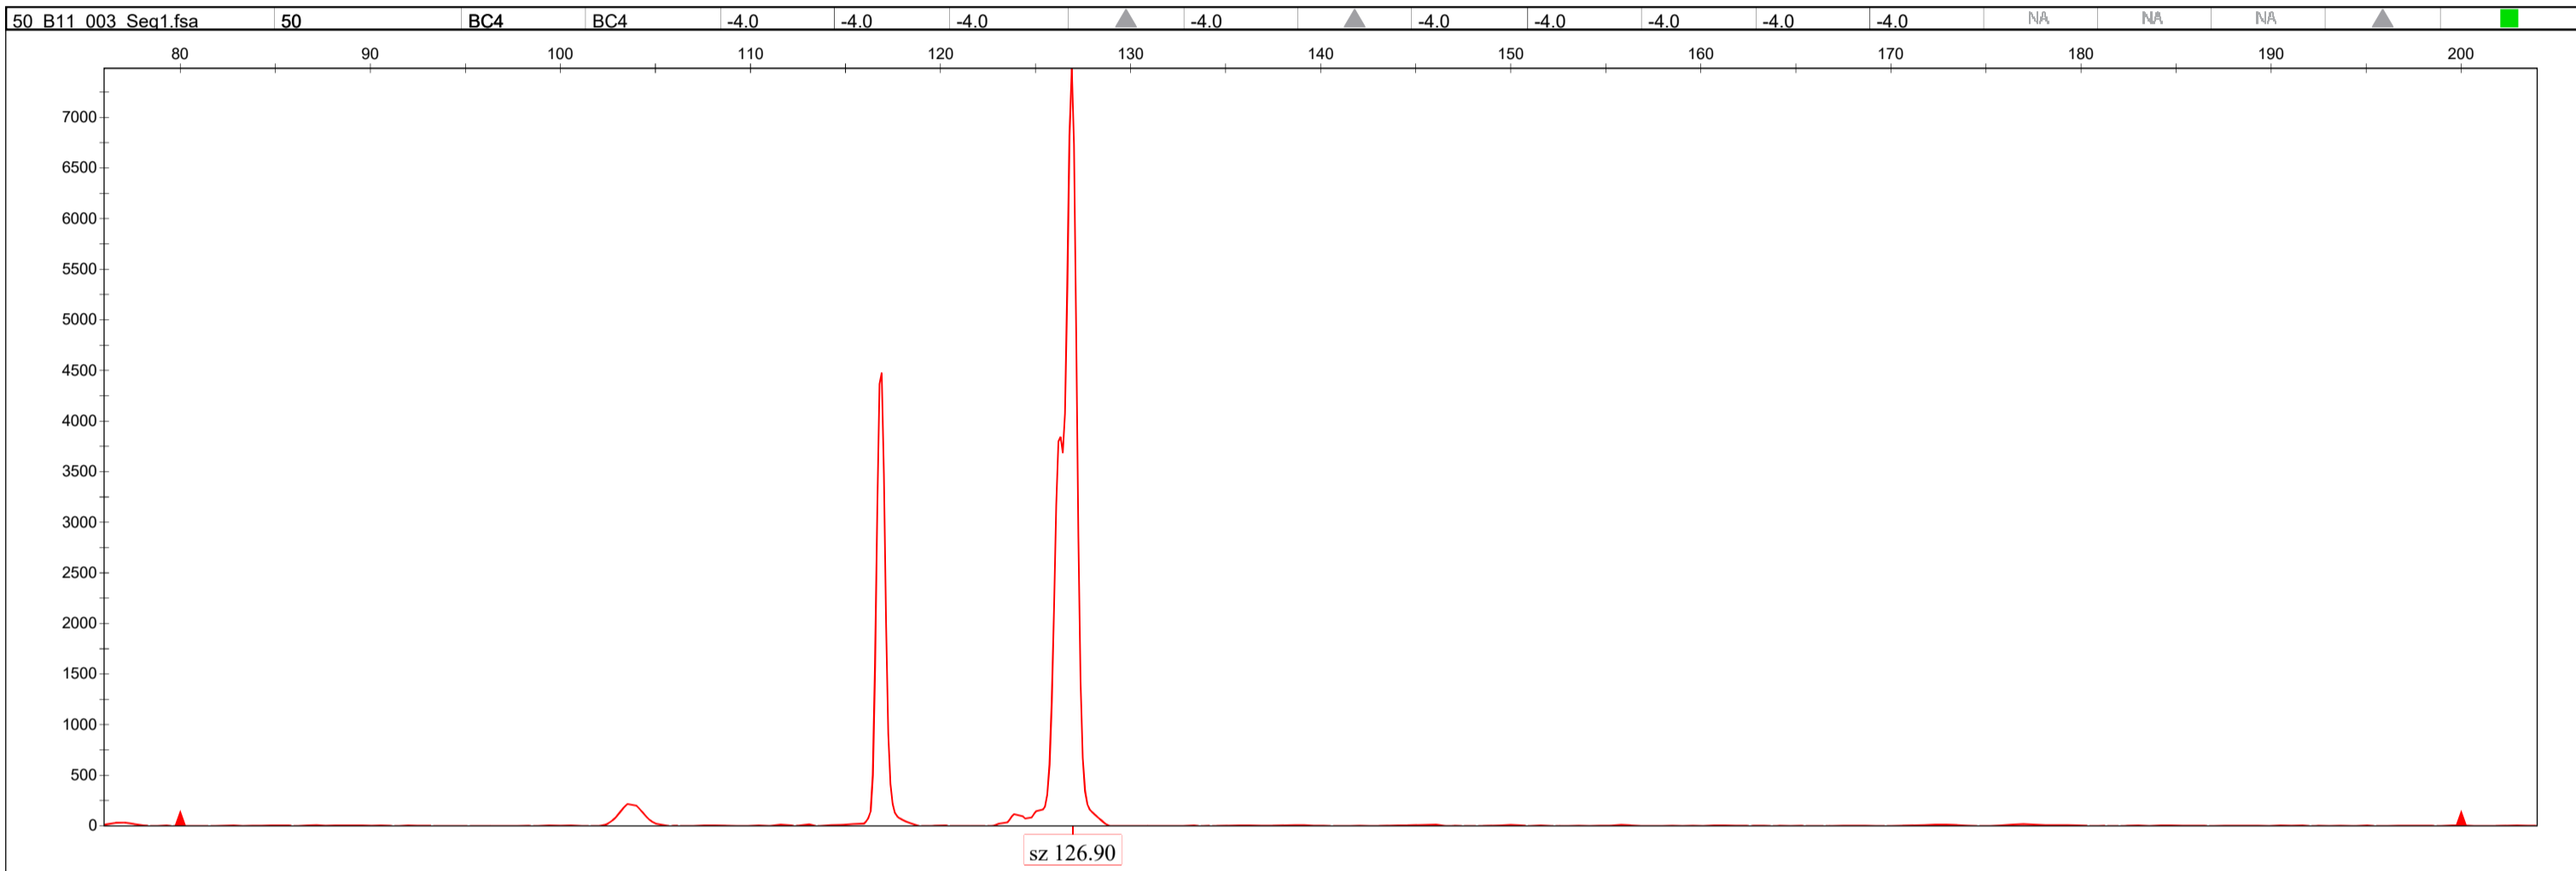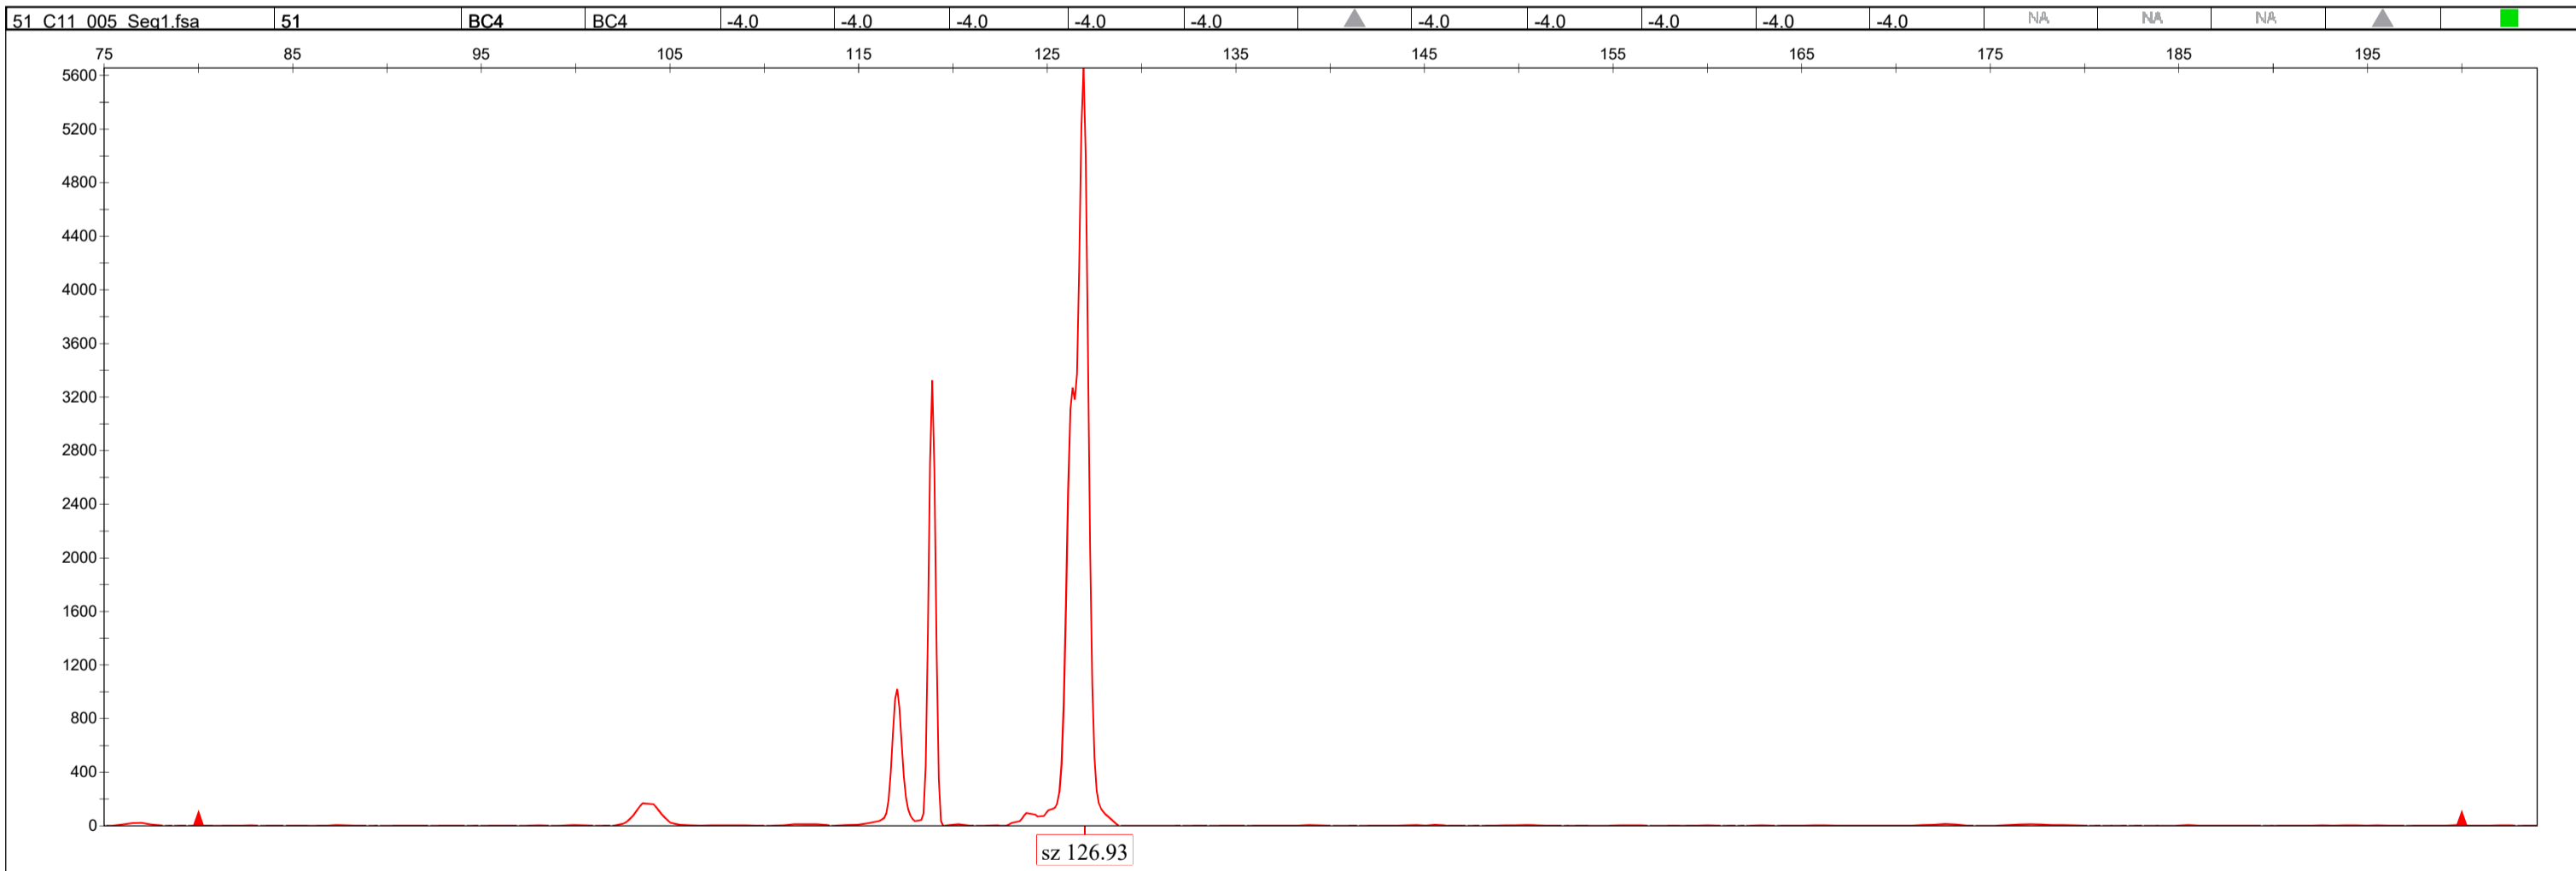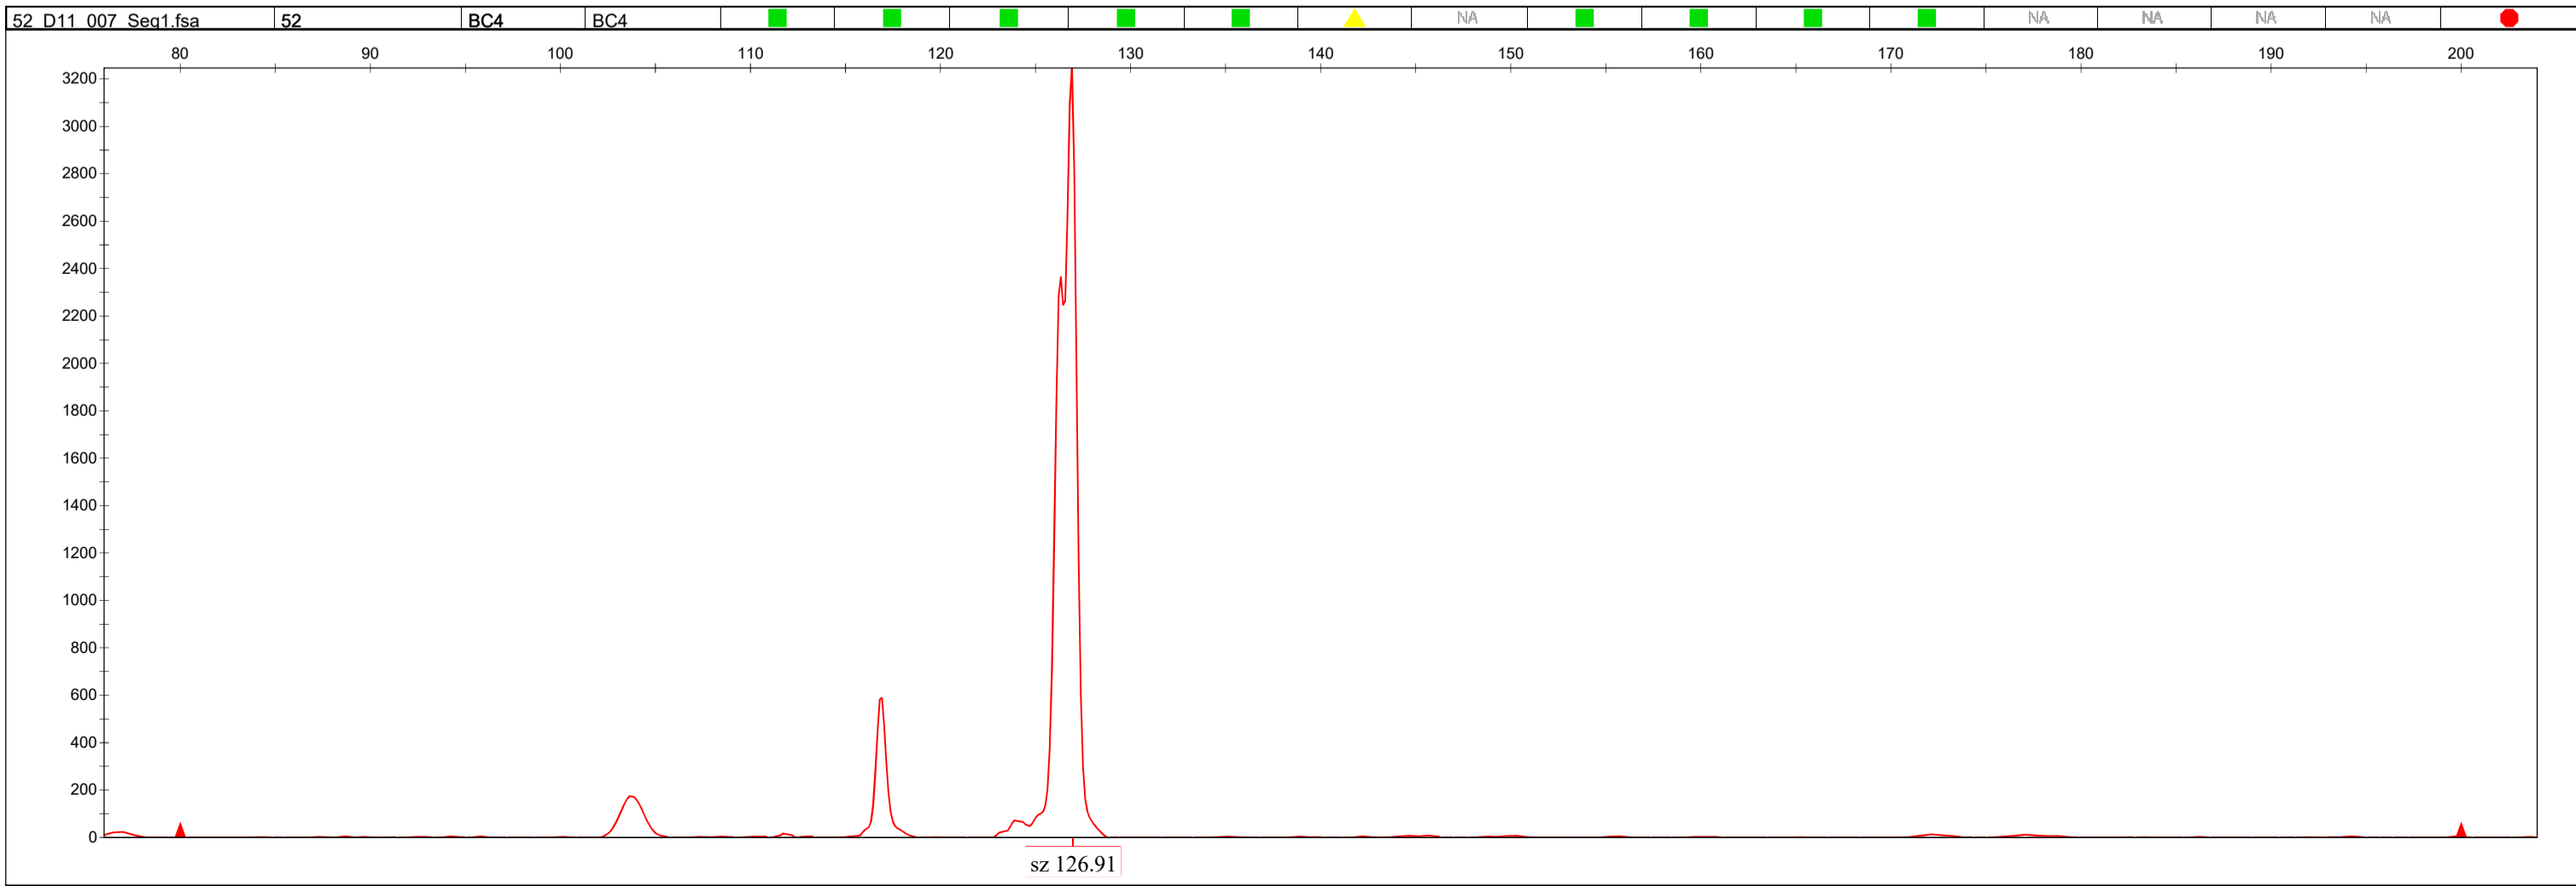

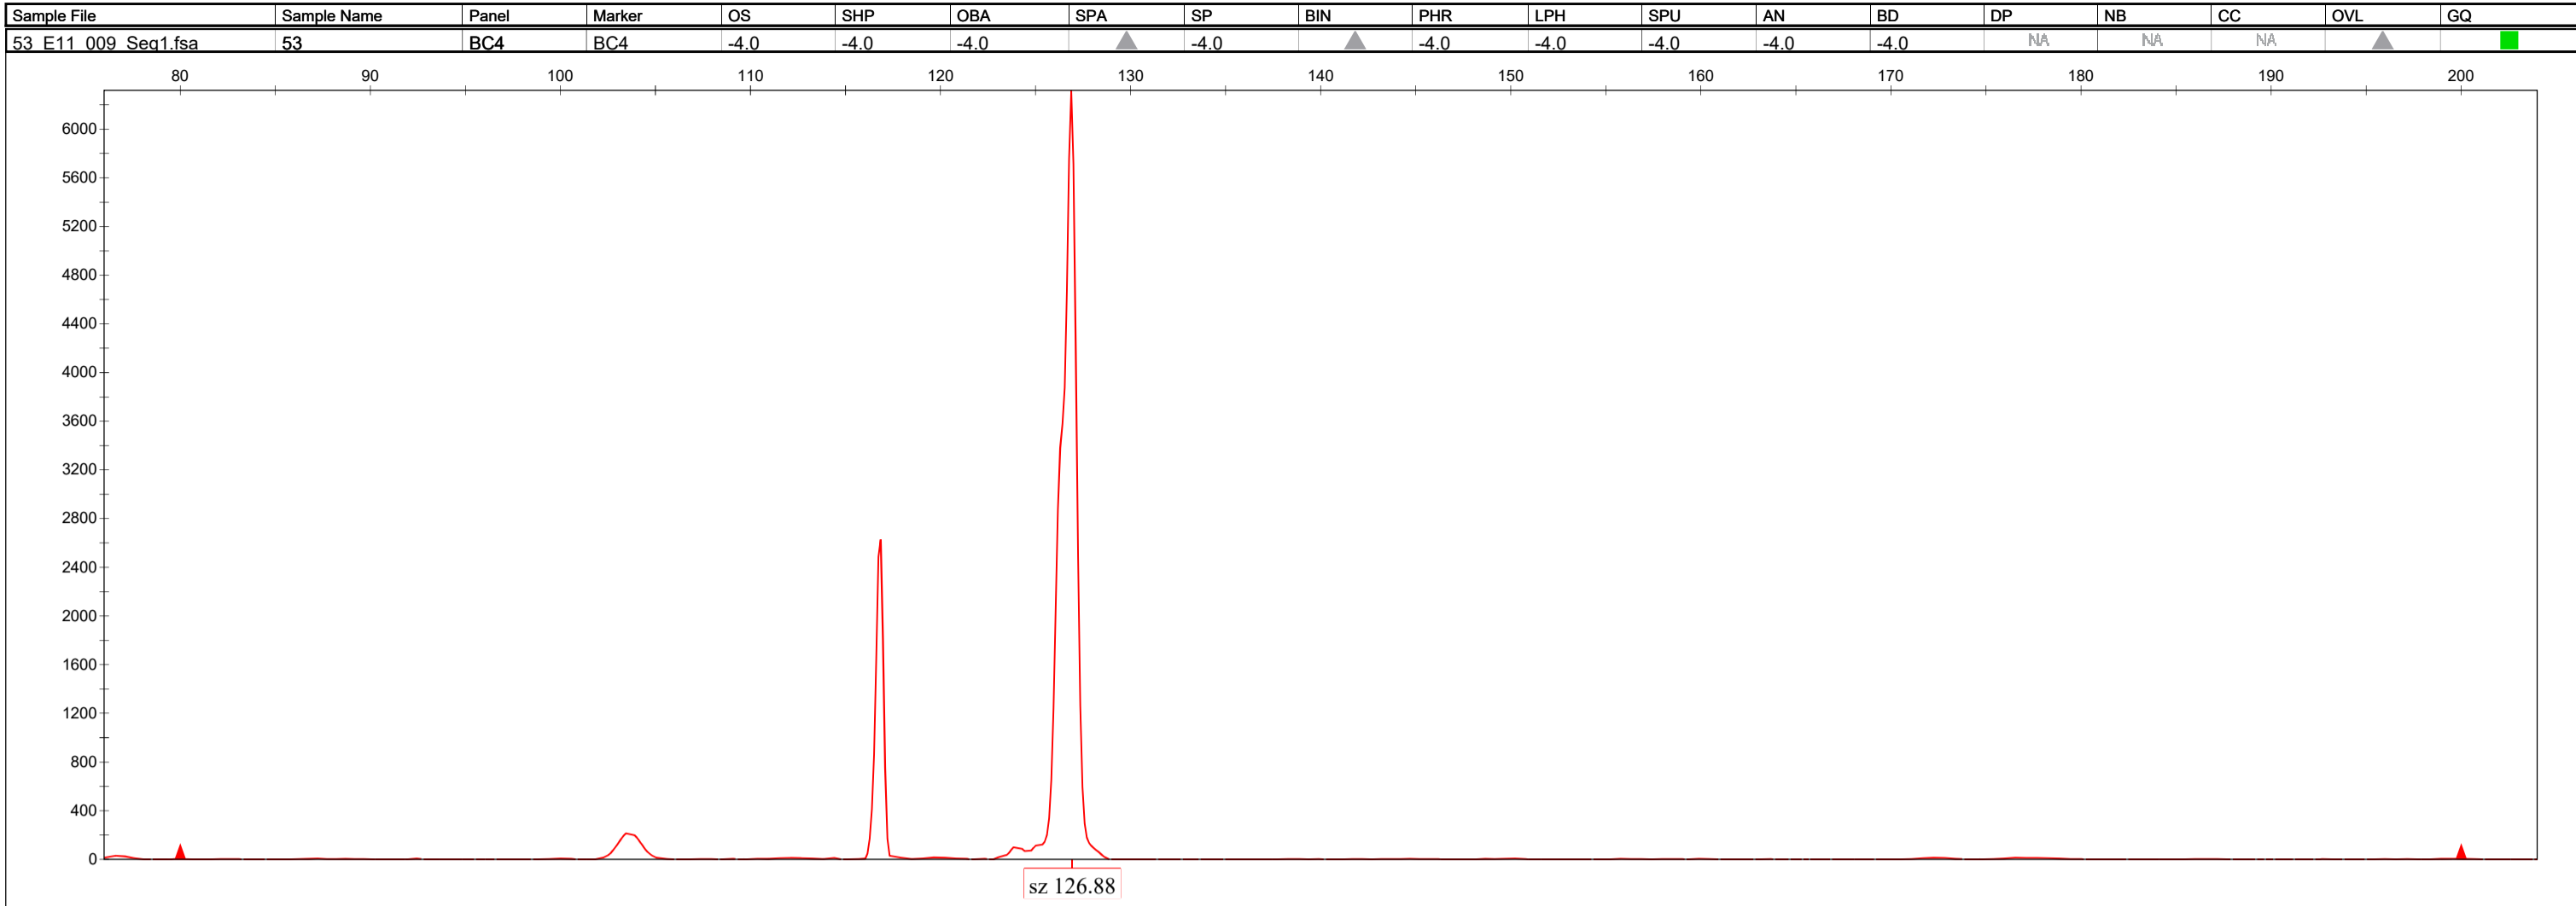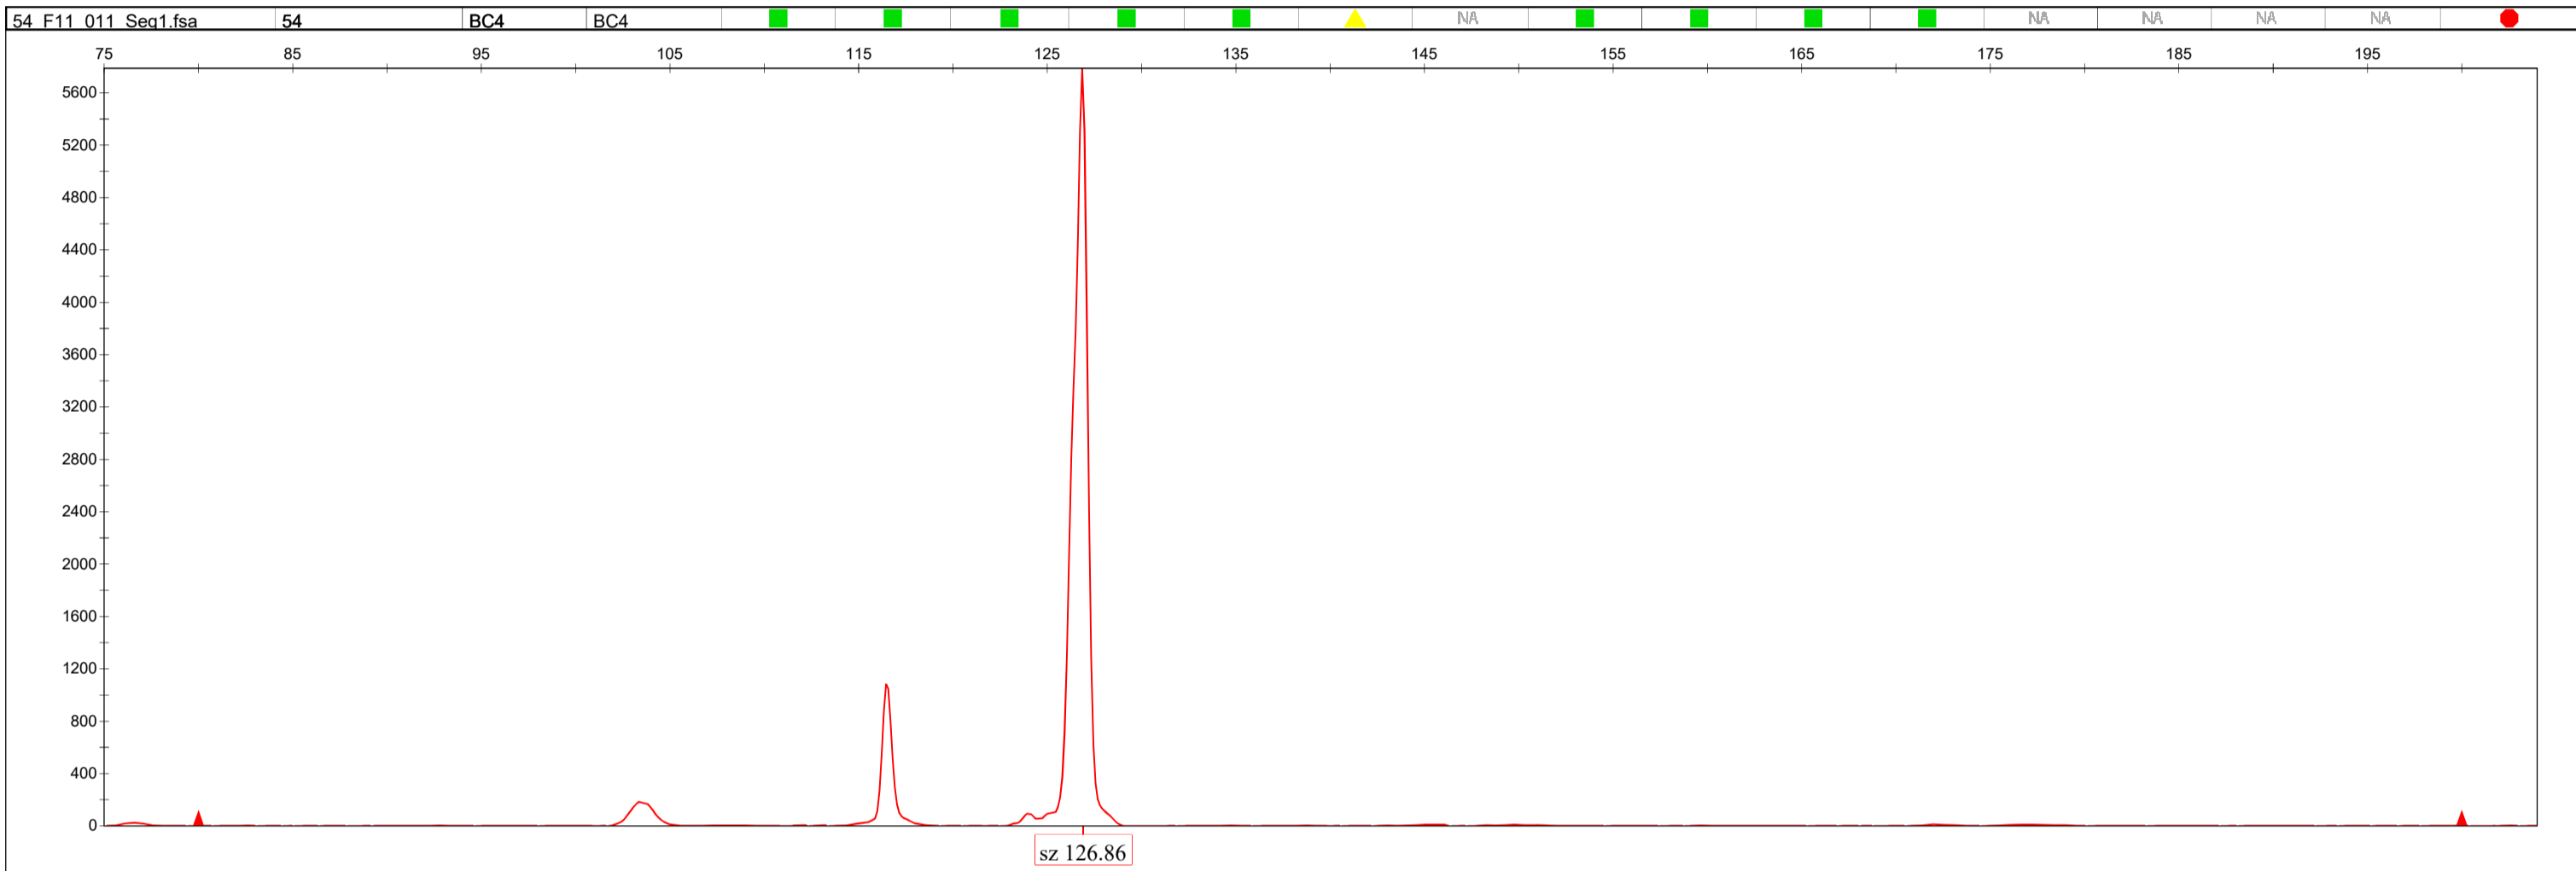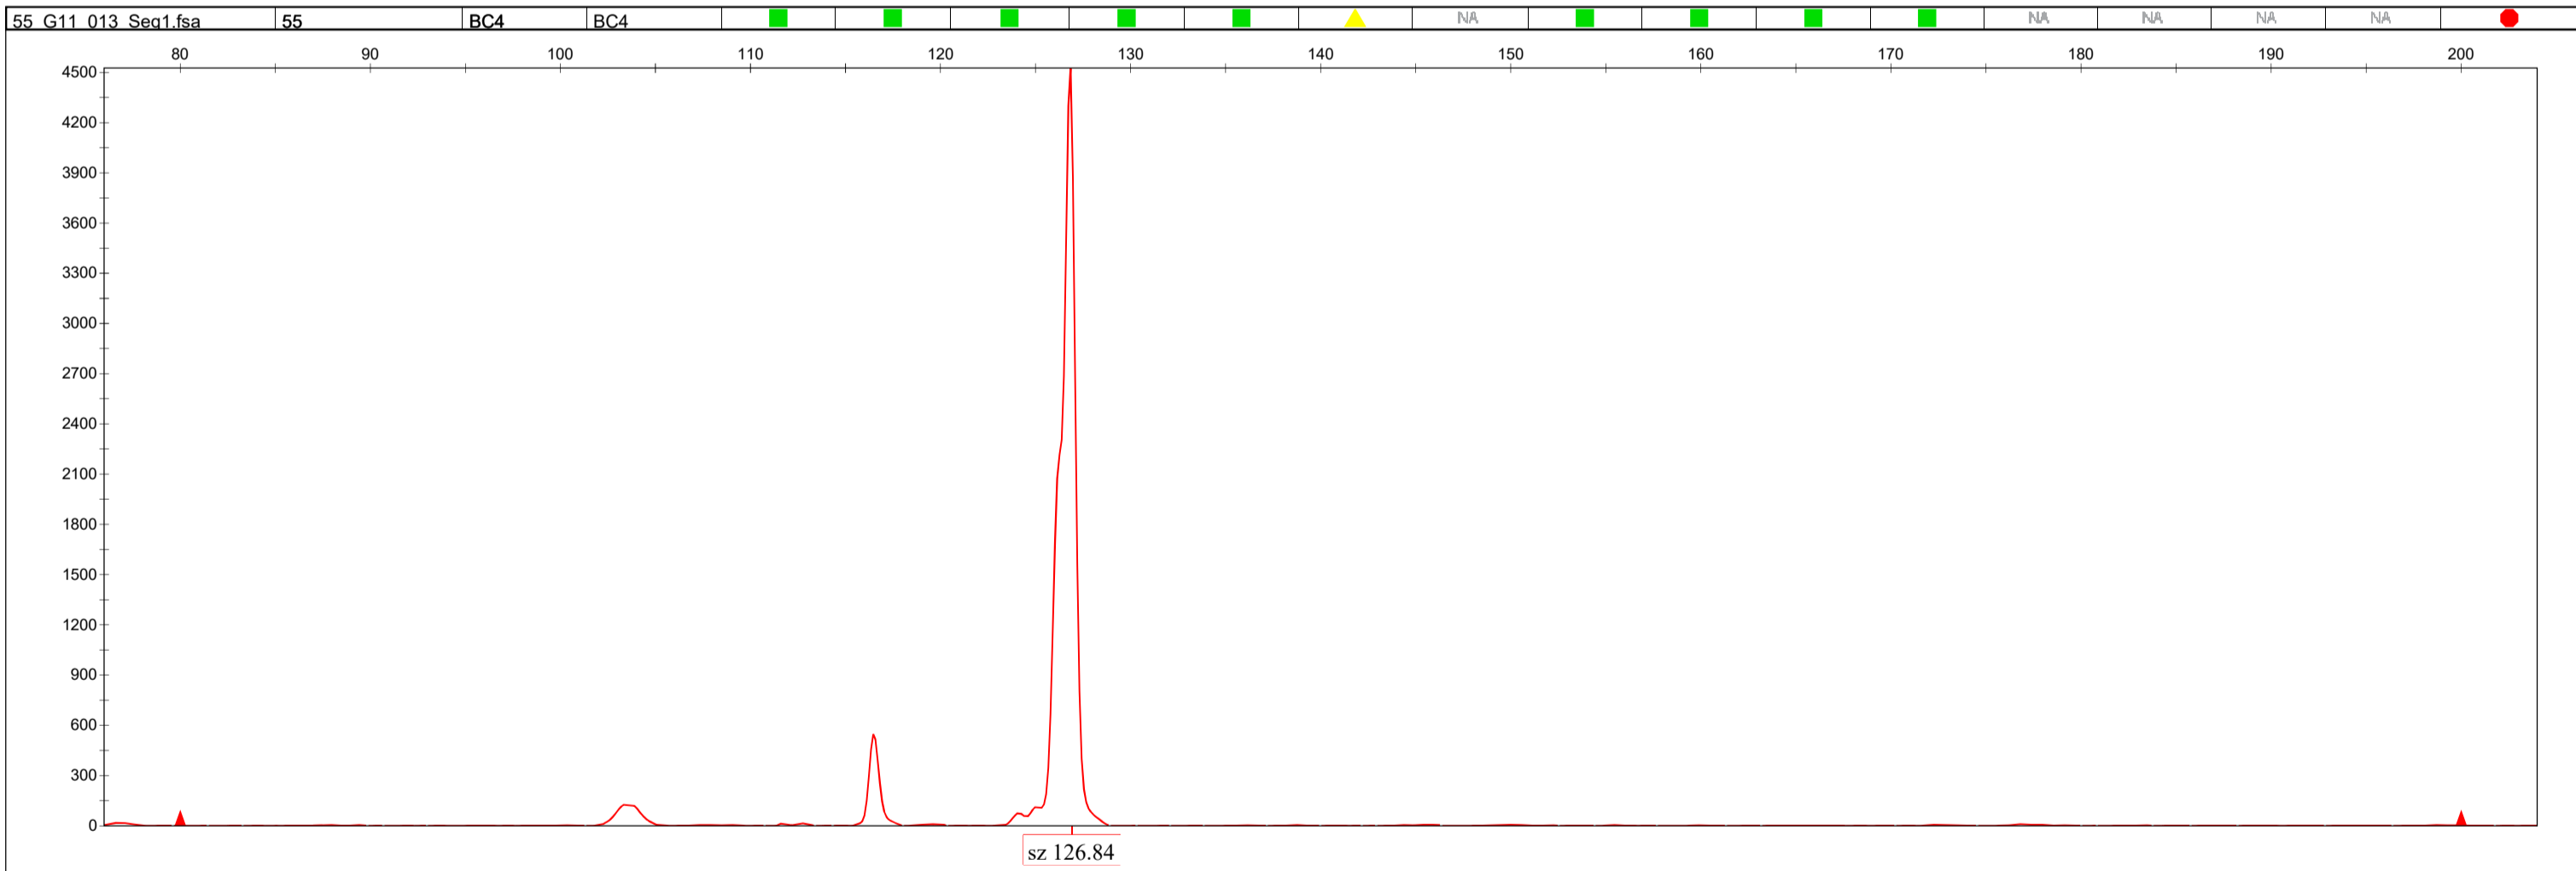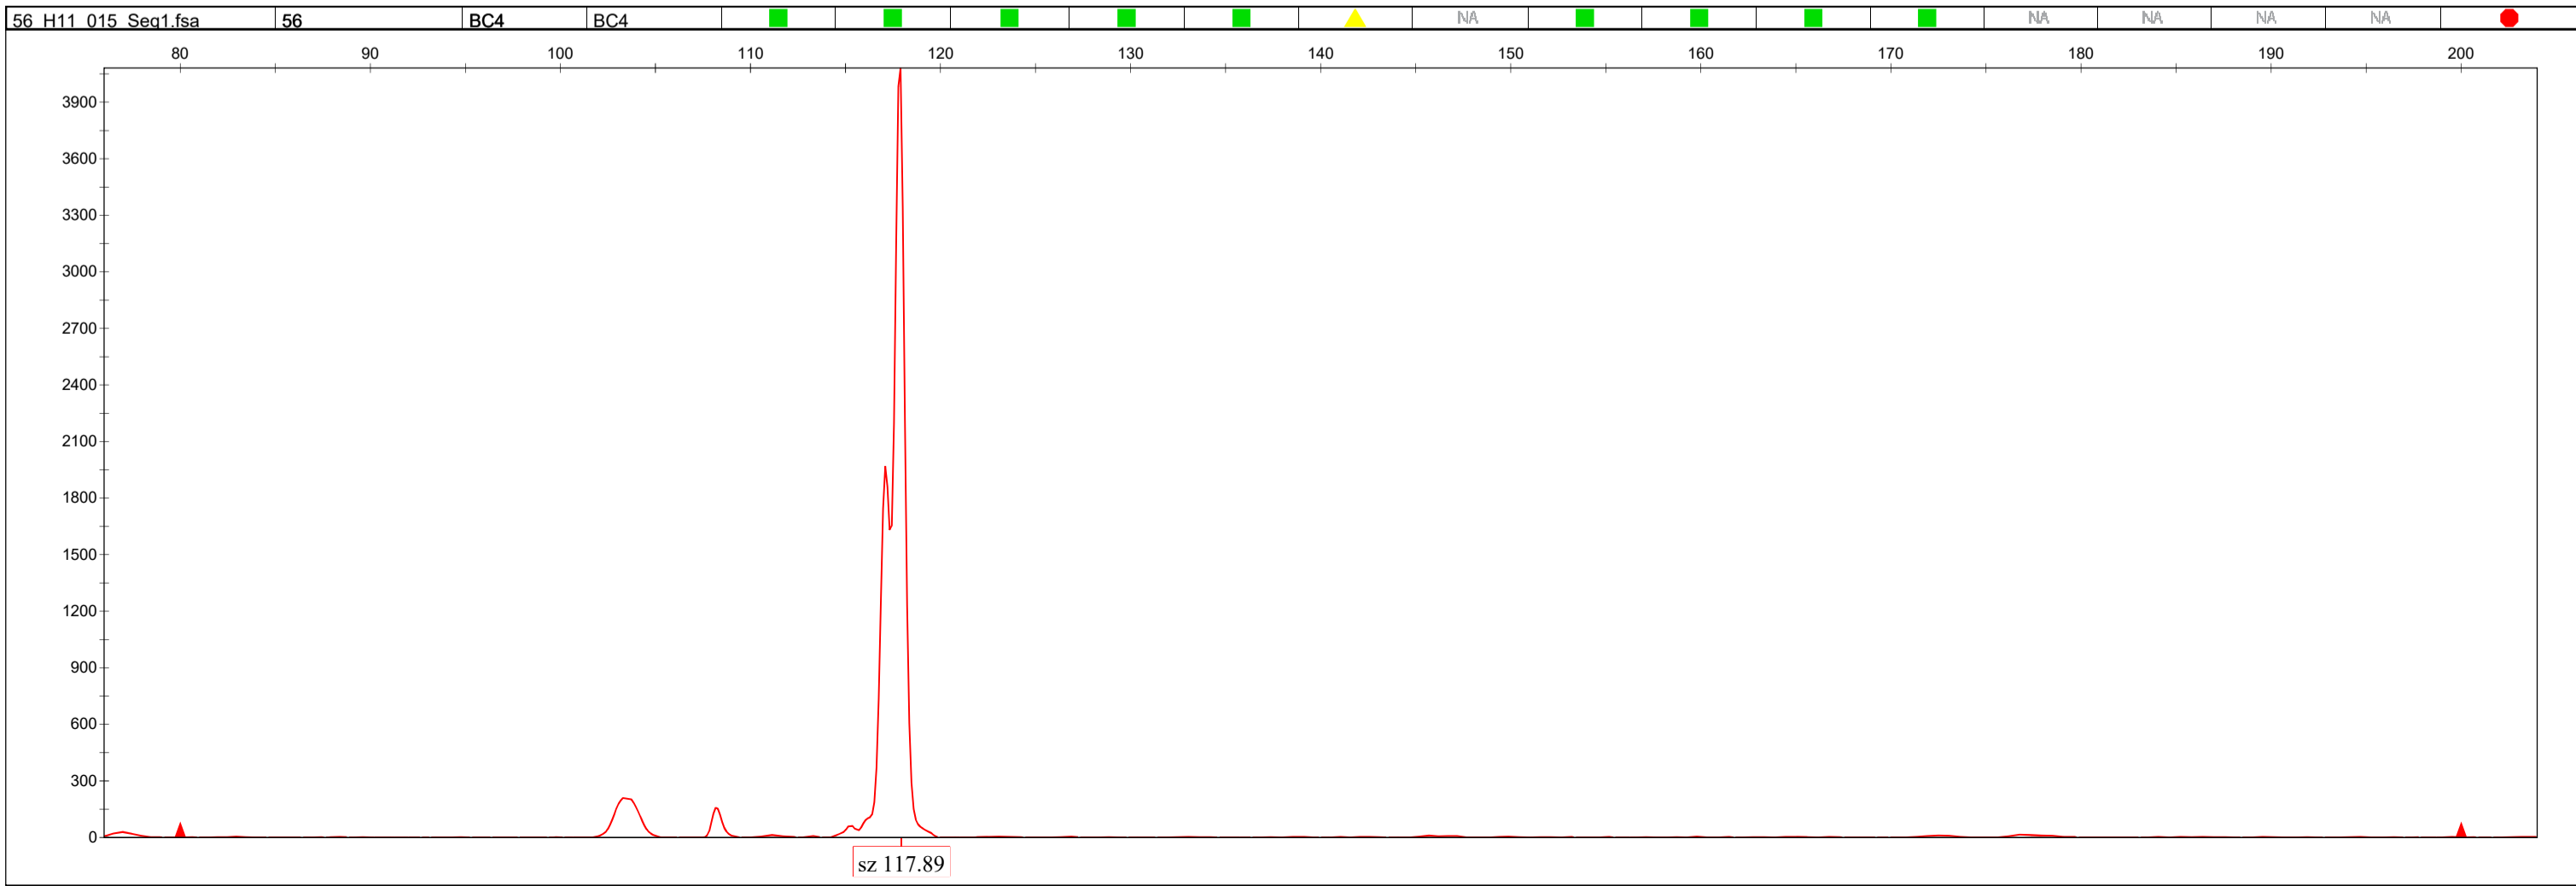

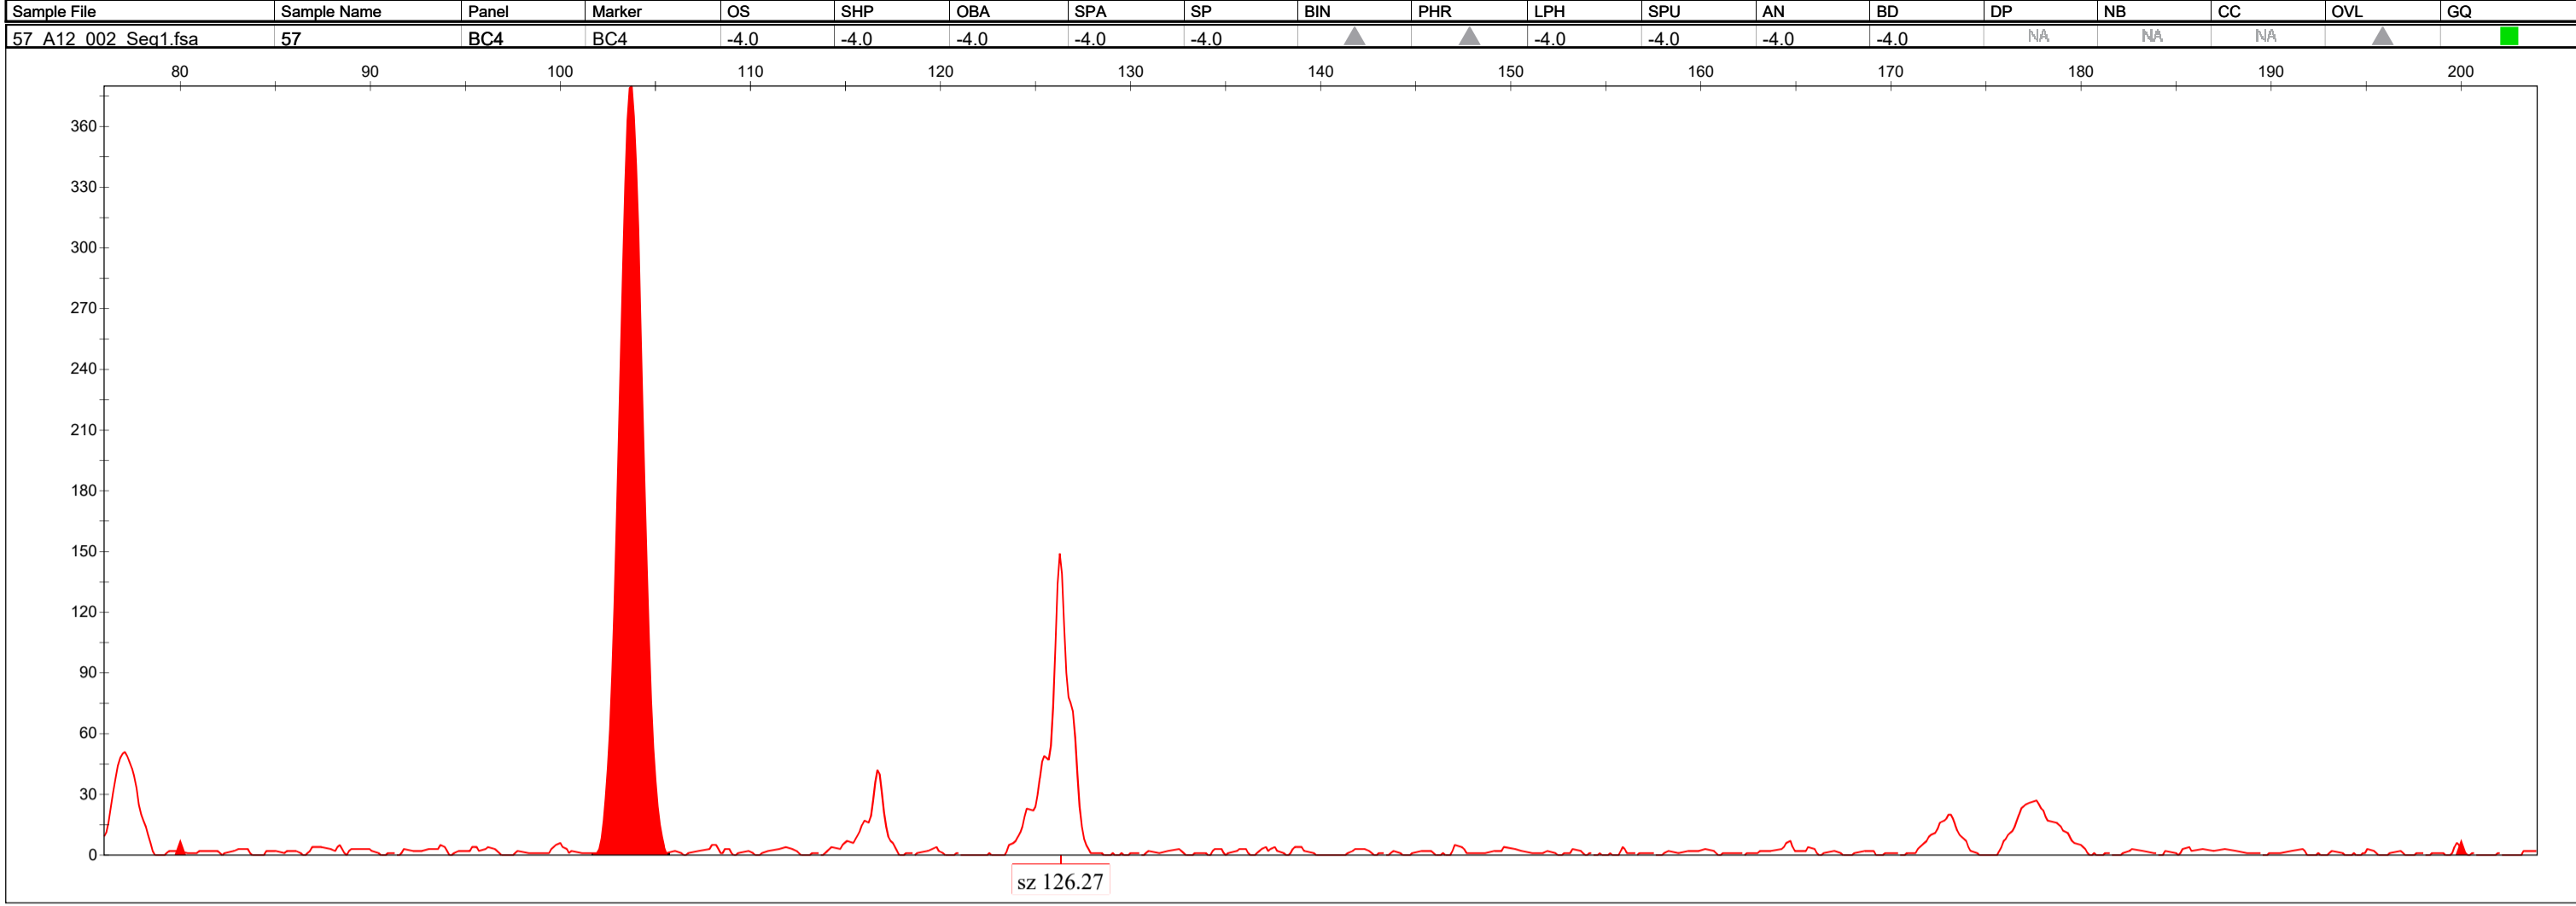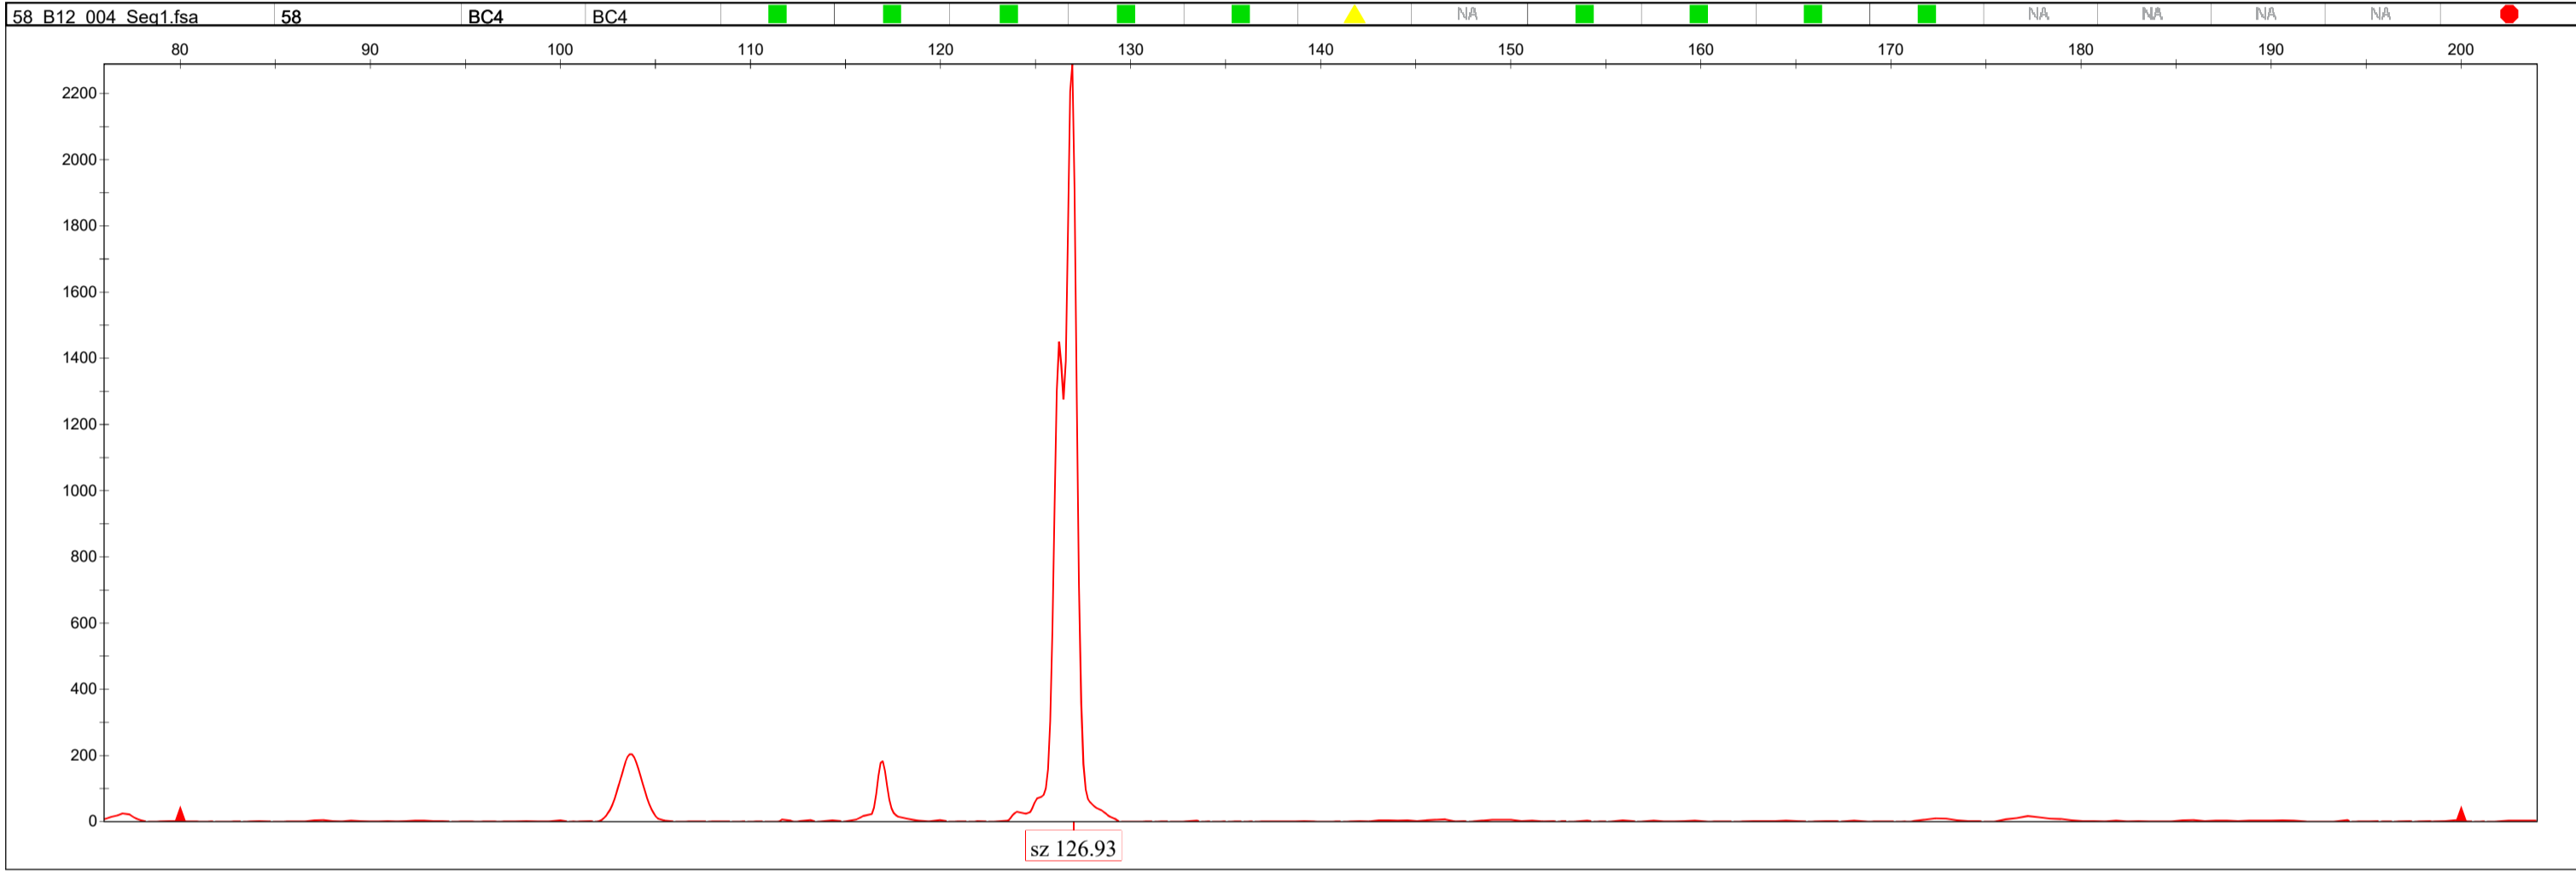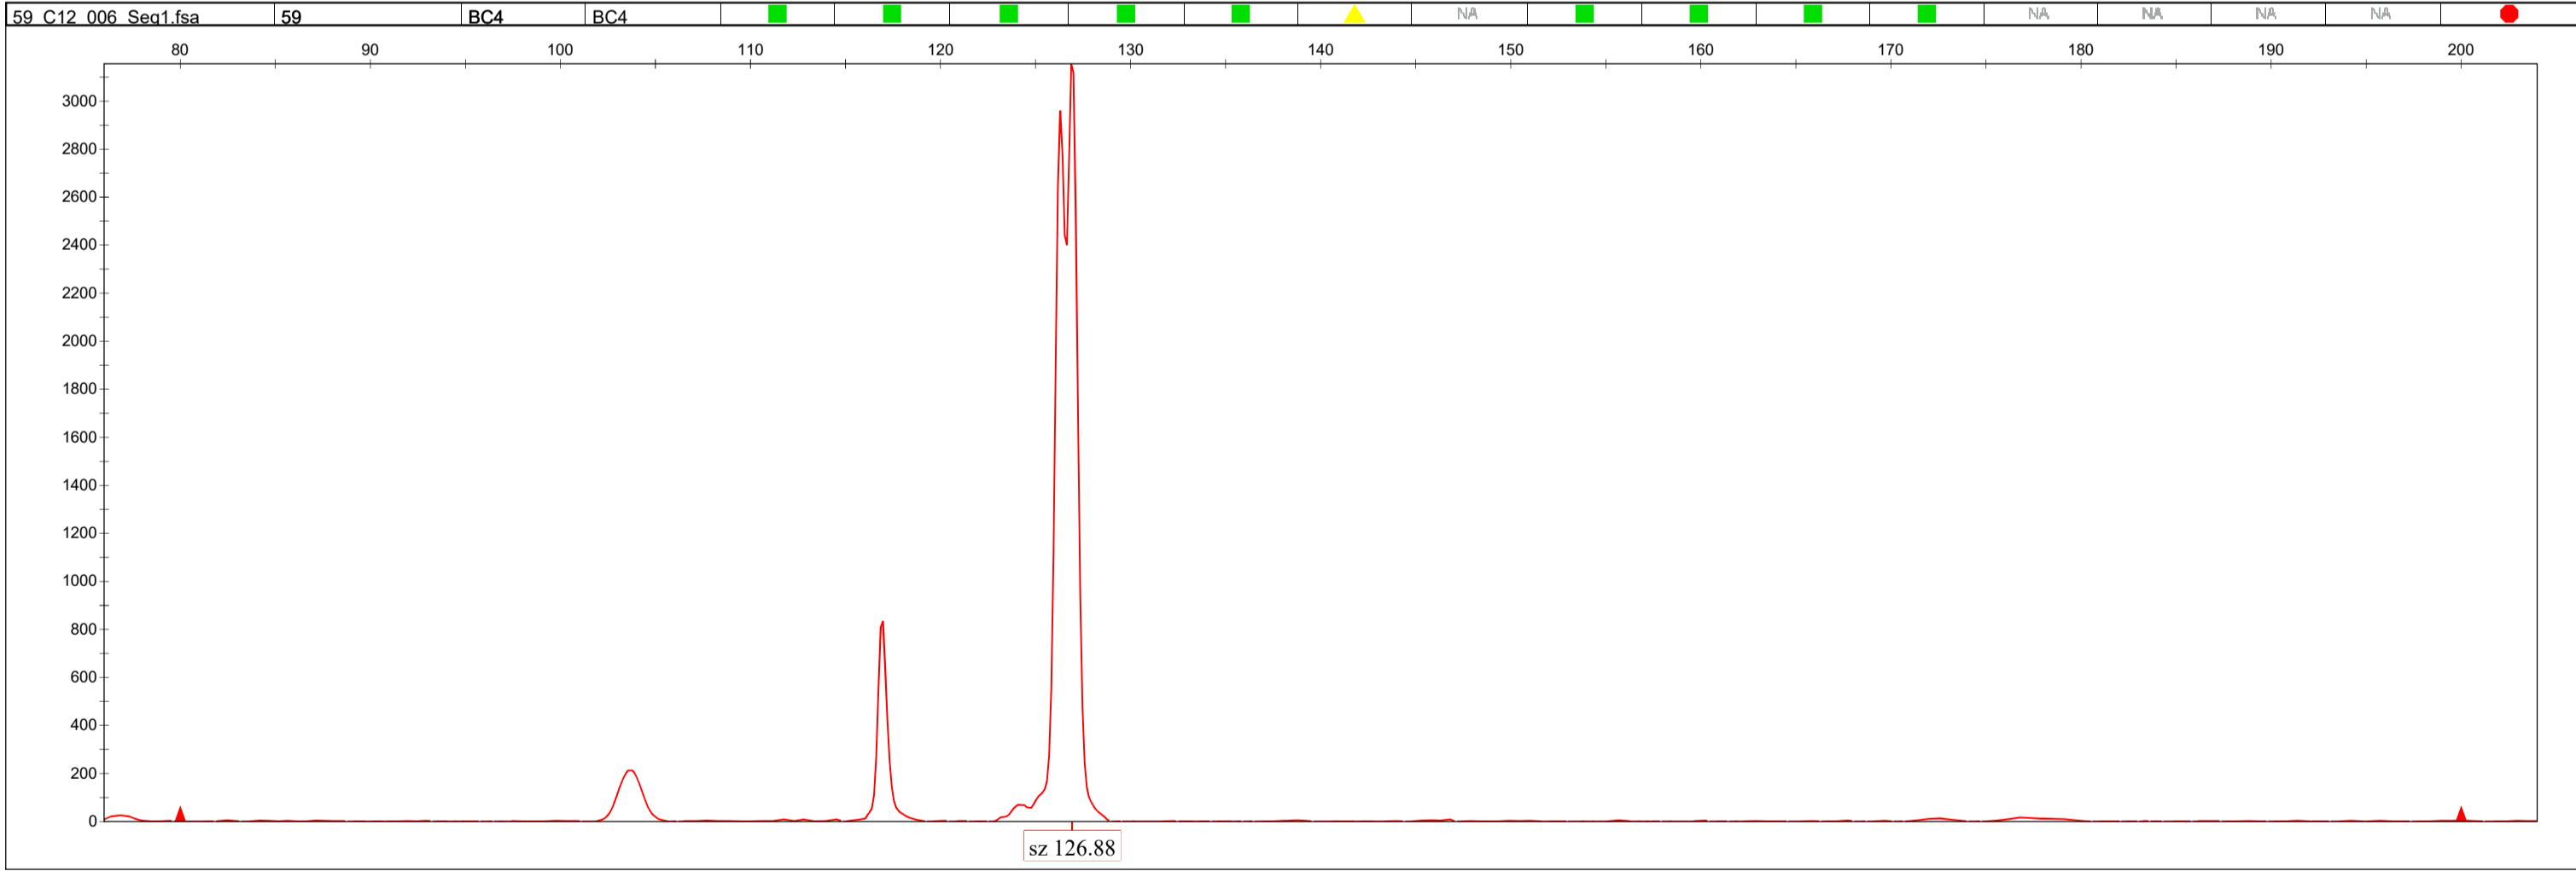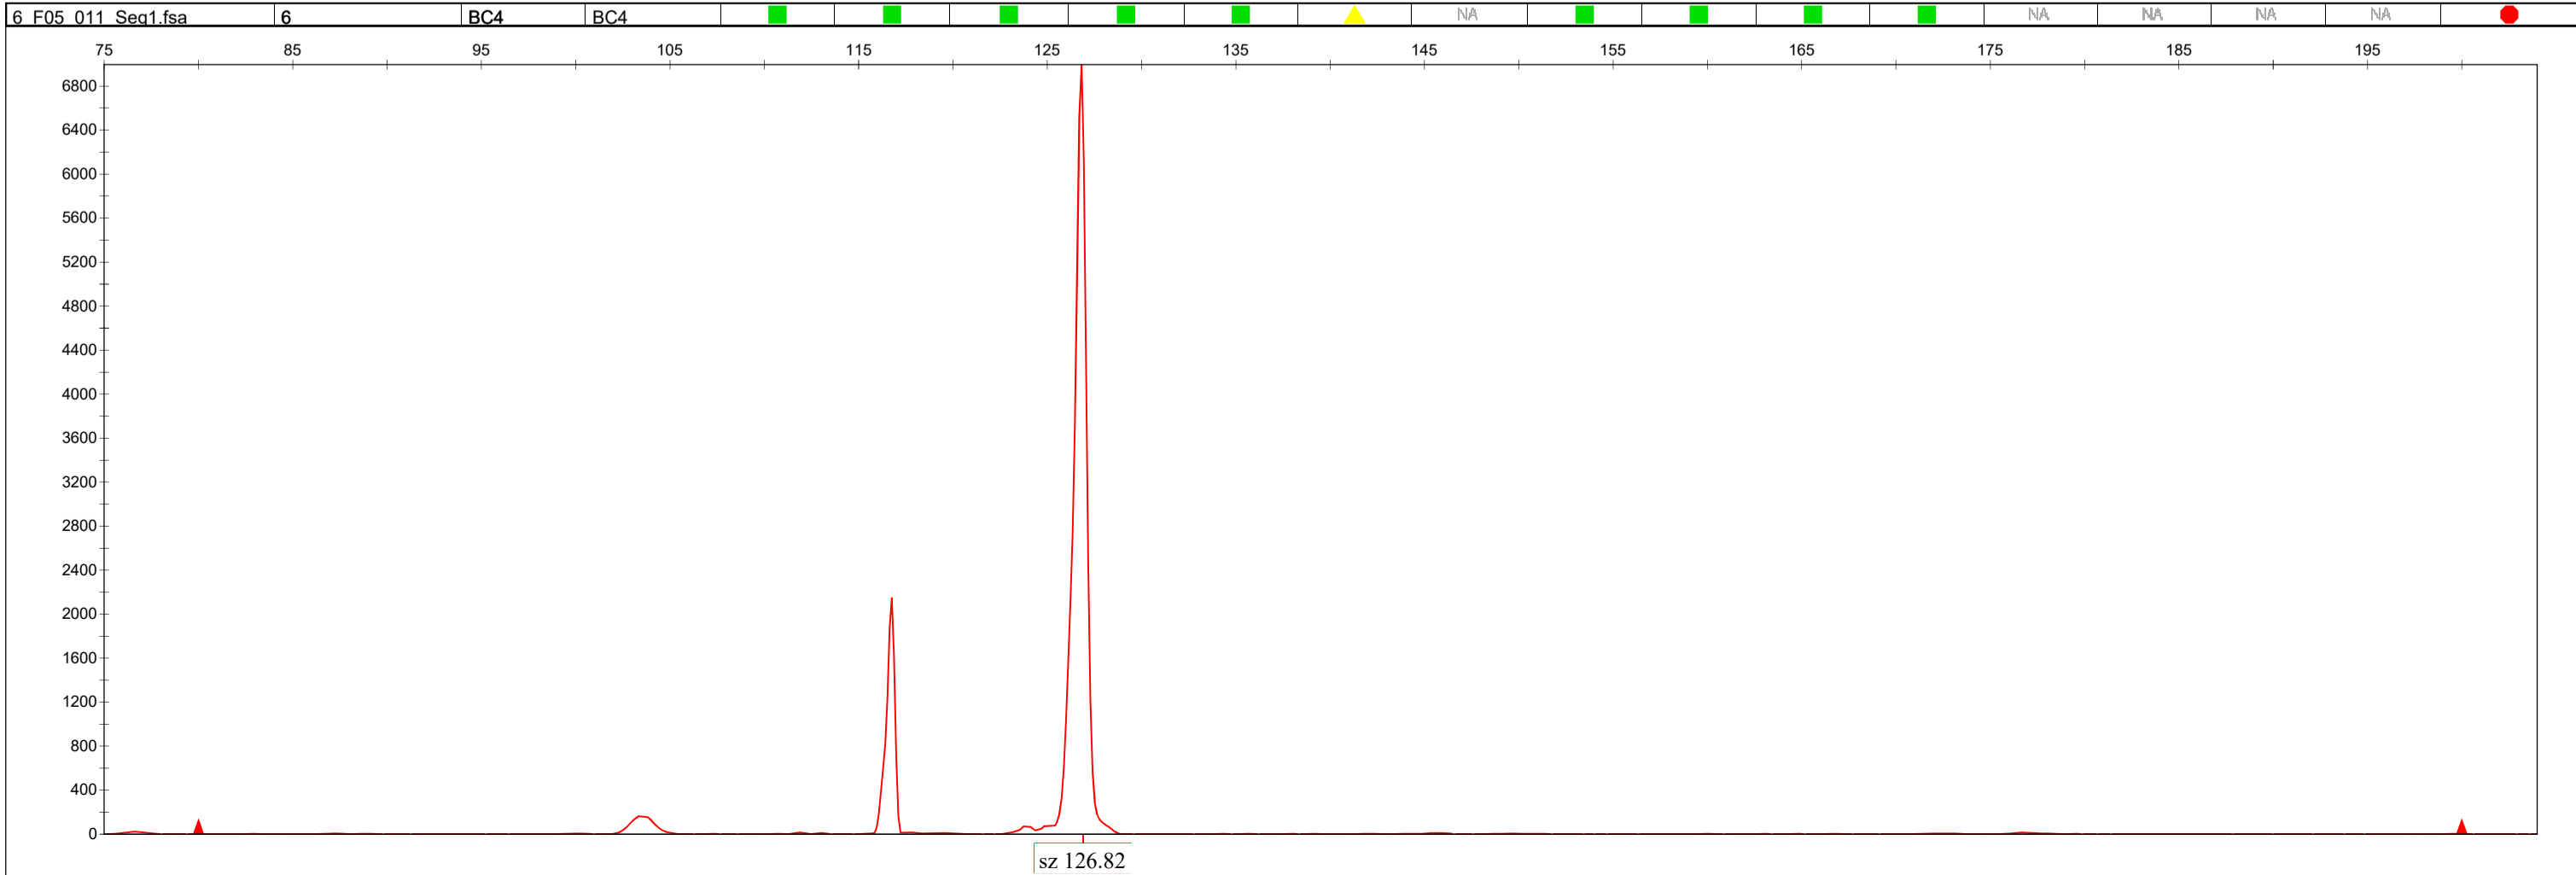

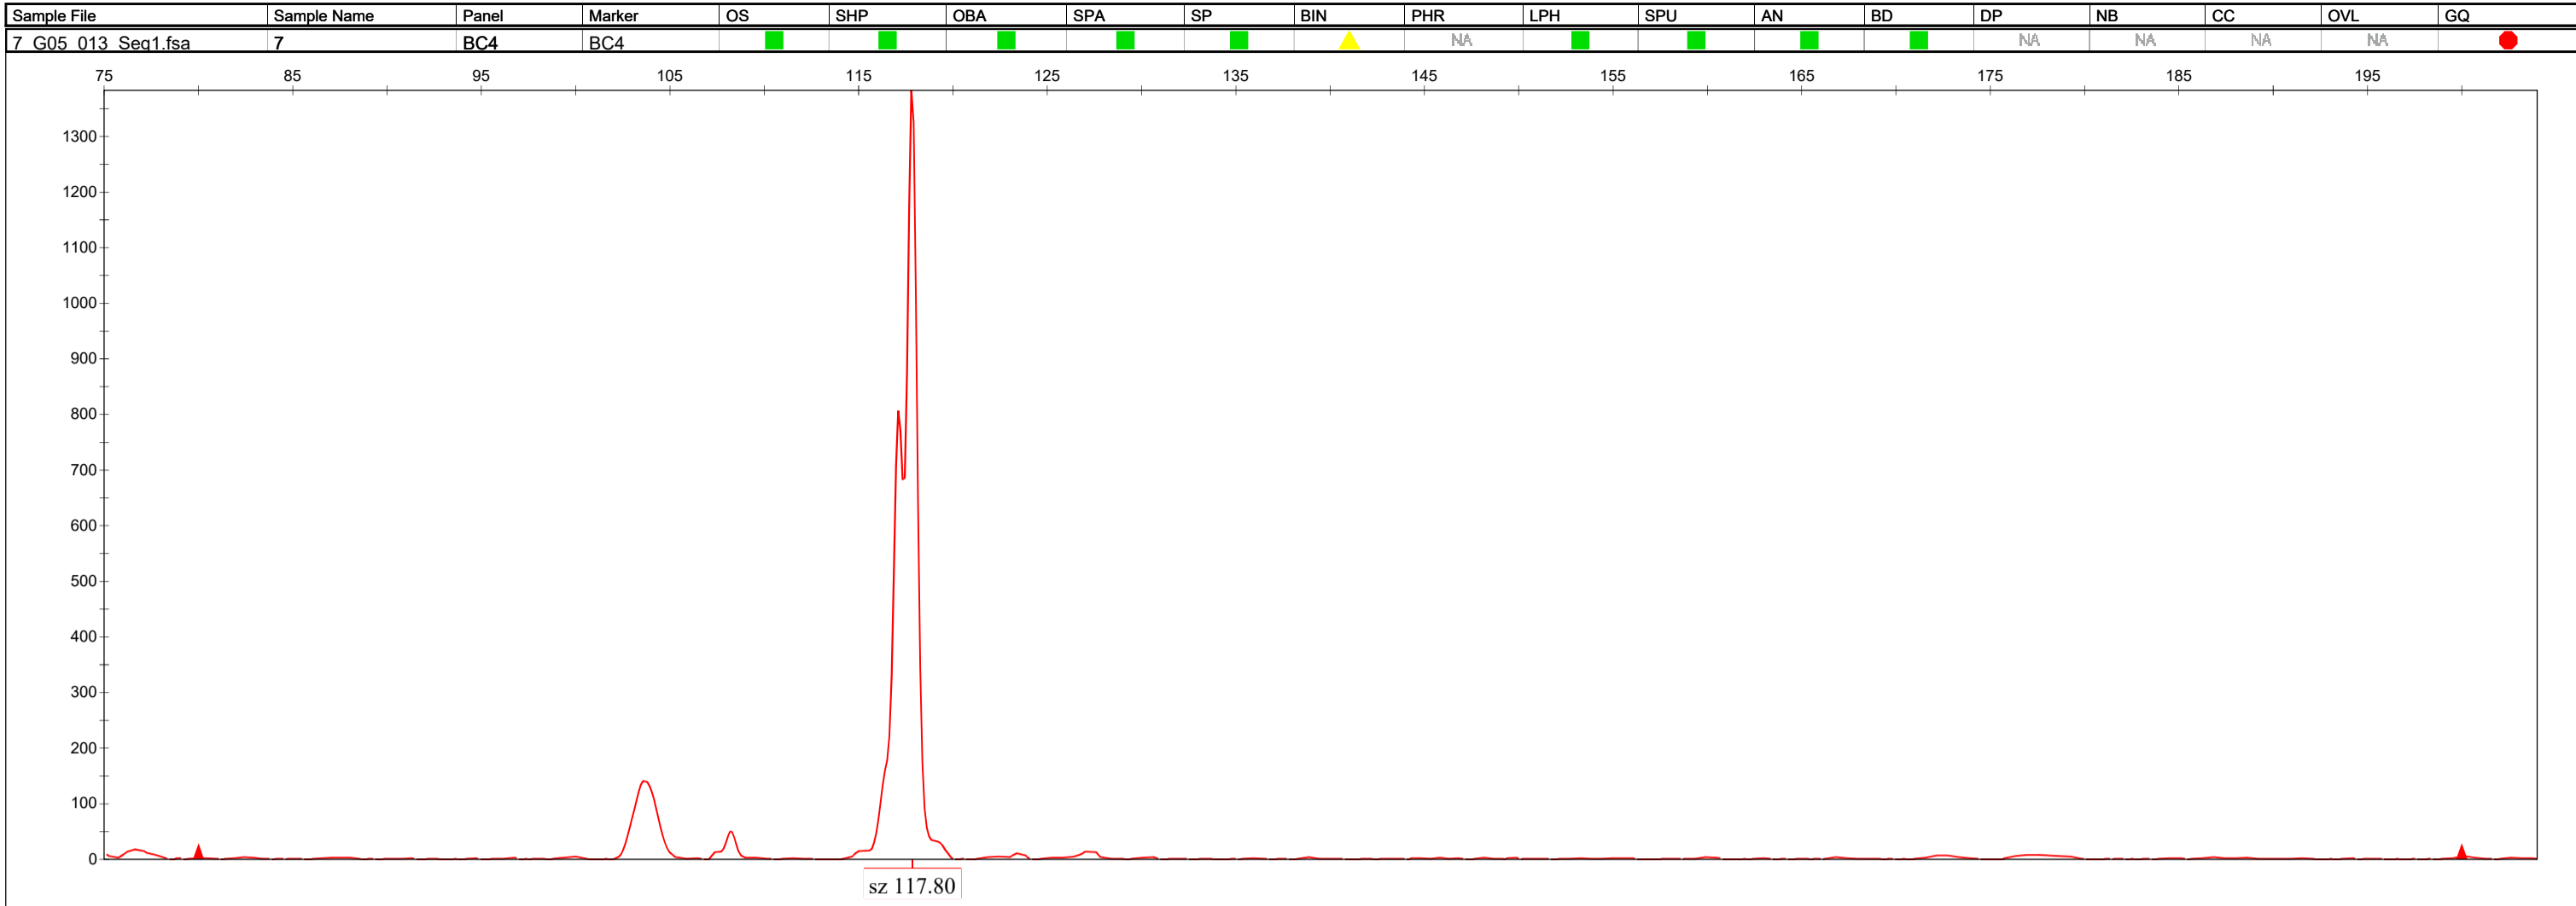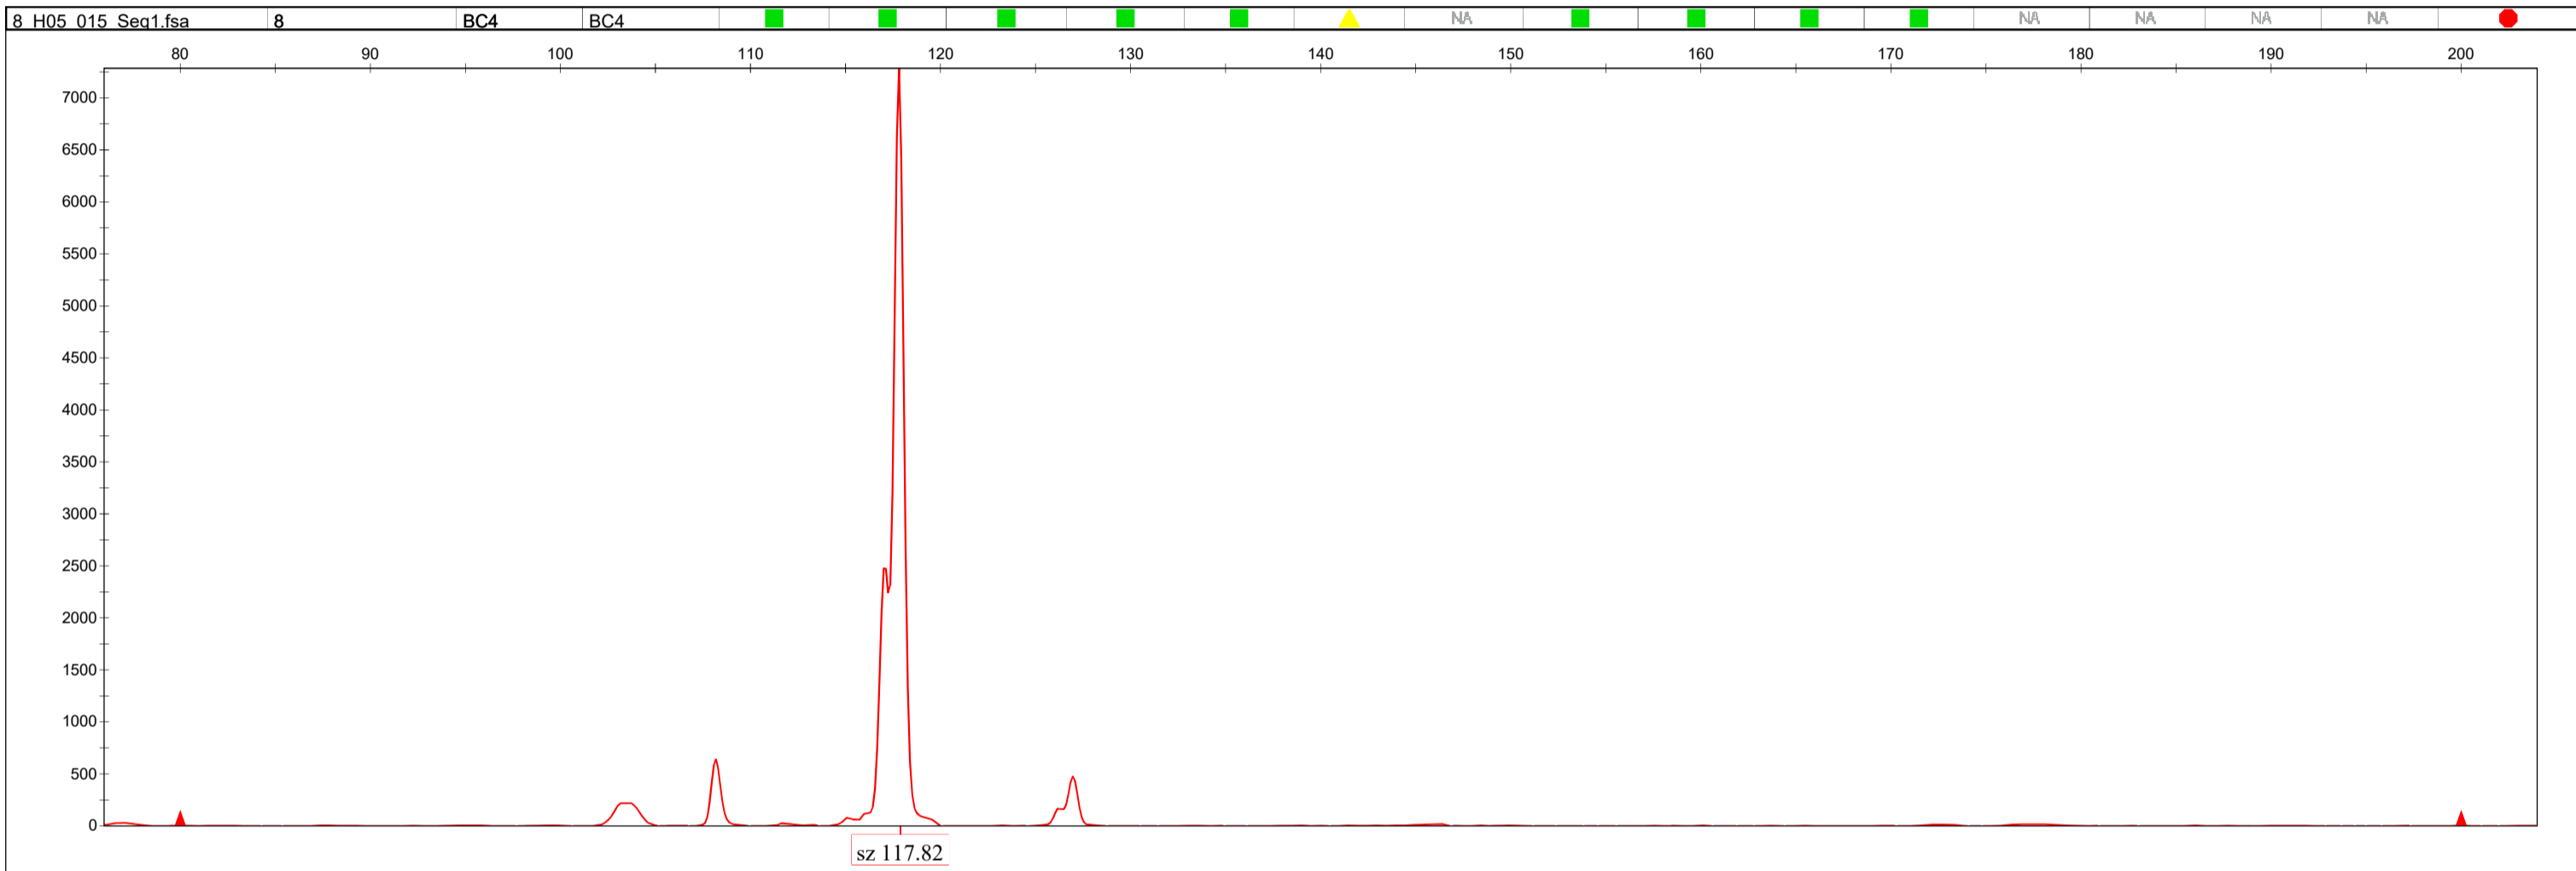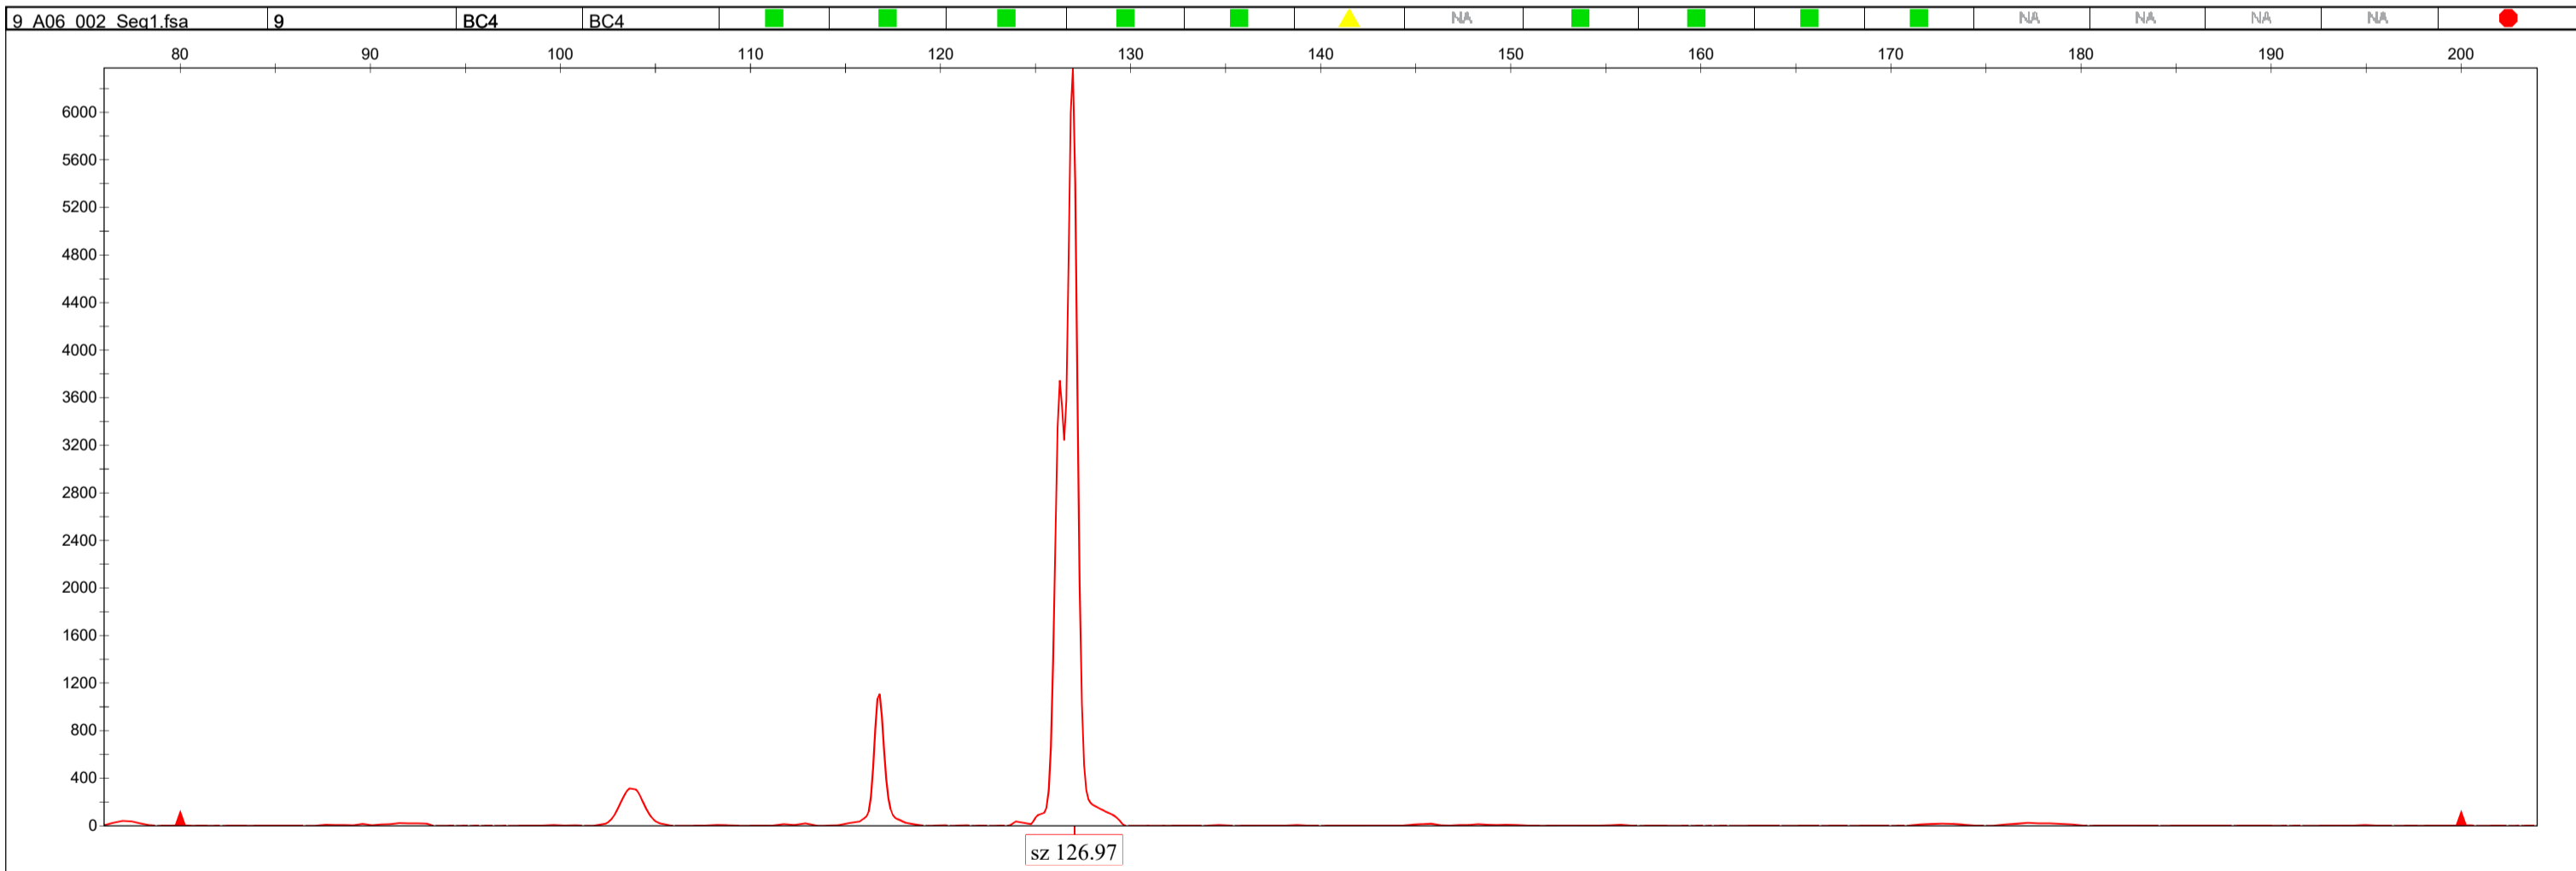

Supplement: s1 [file s1 › BC4.pdf]

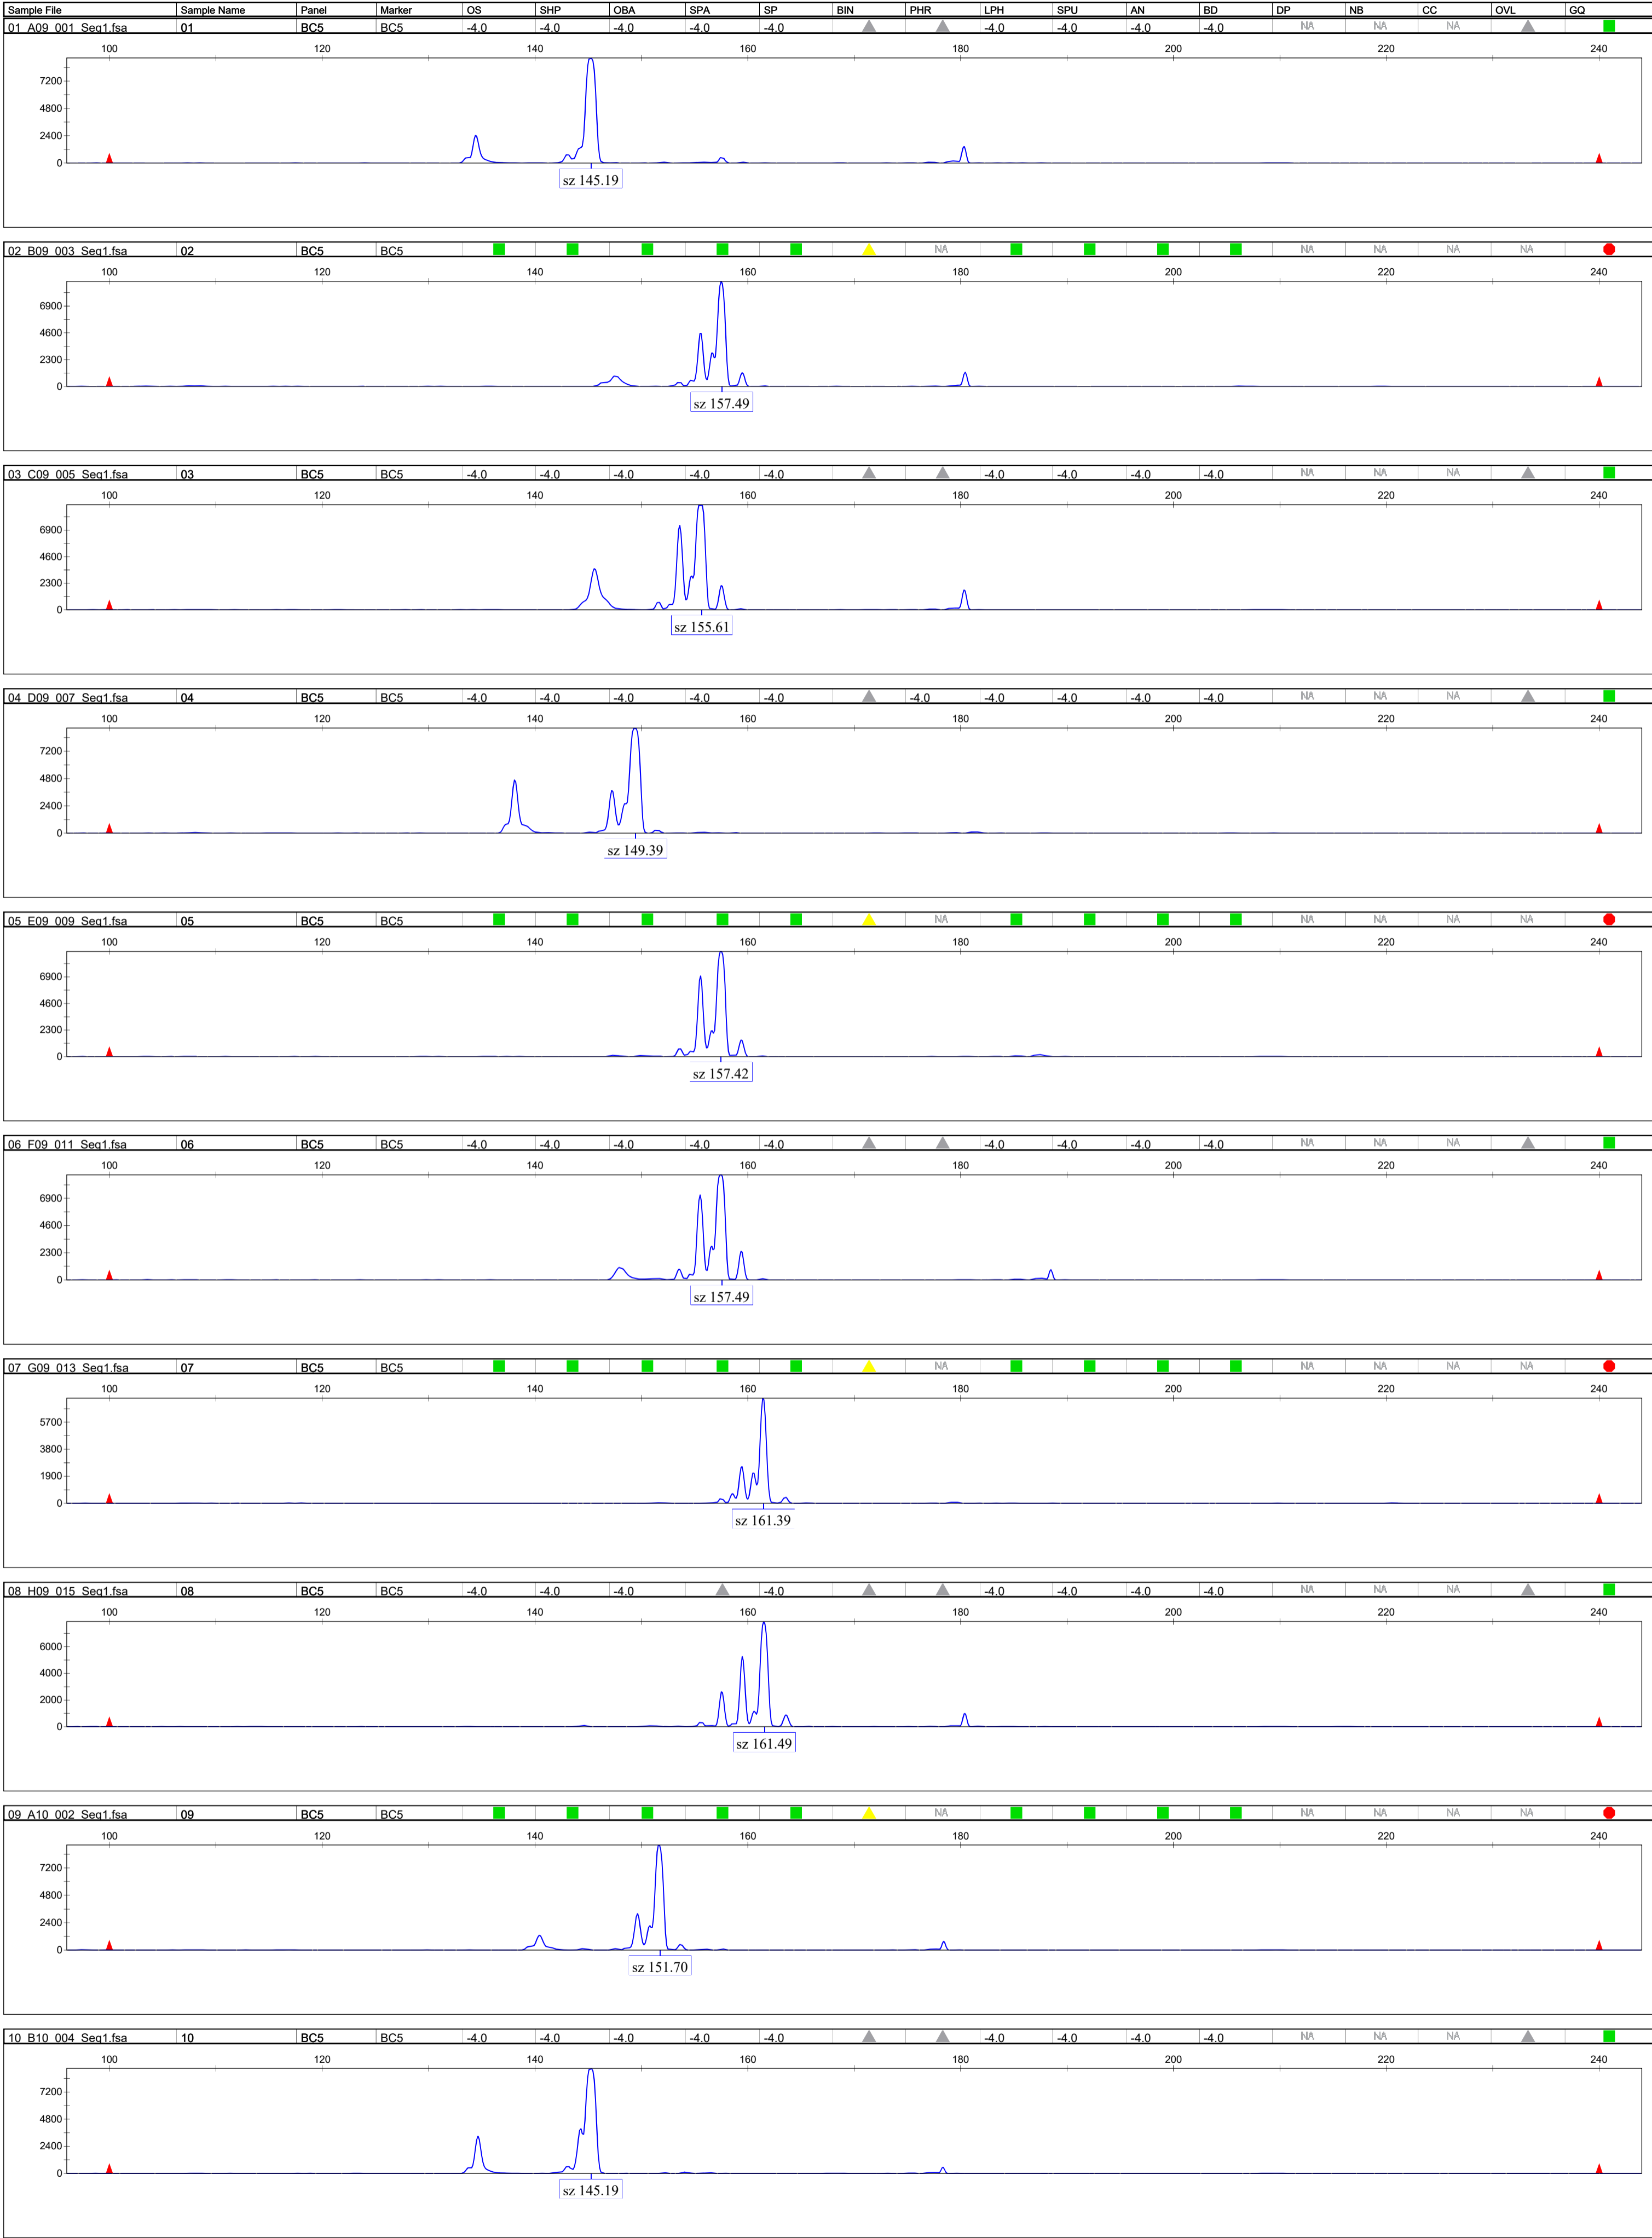

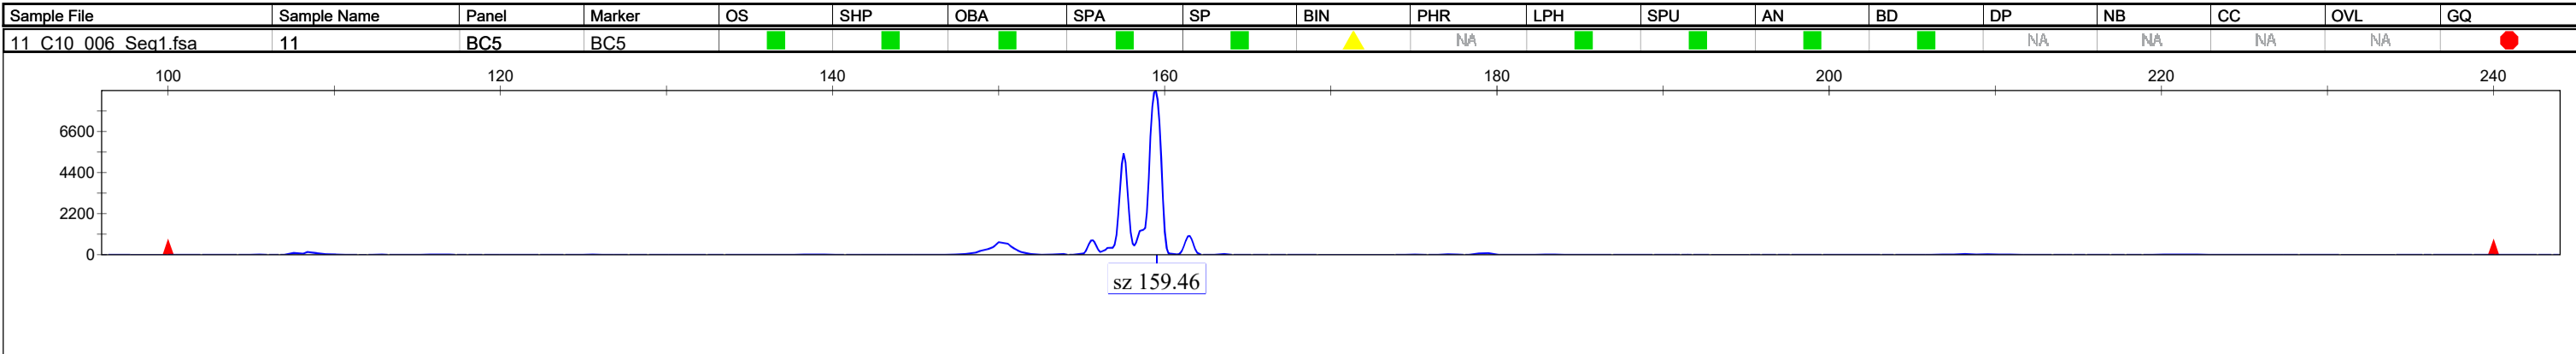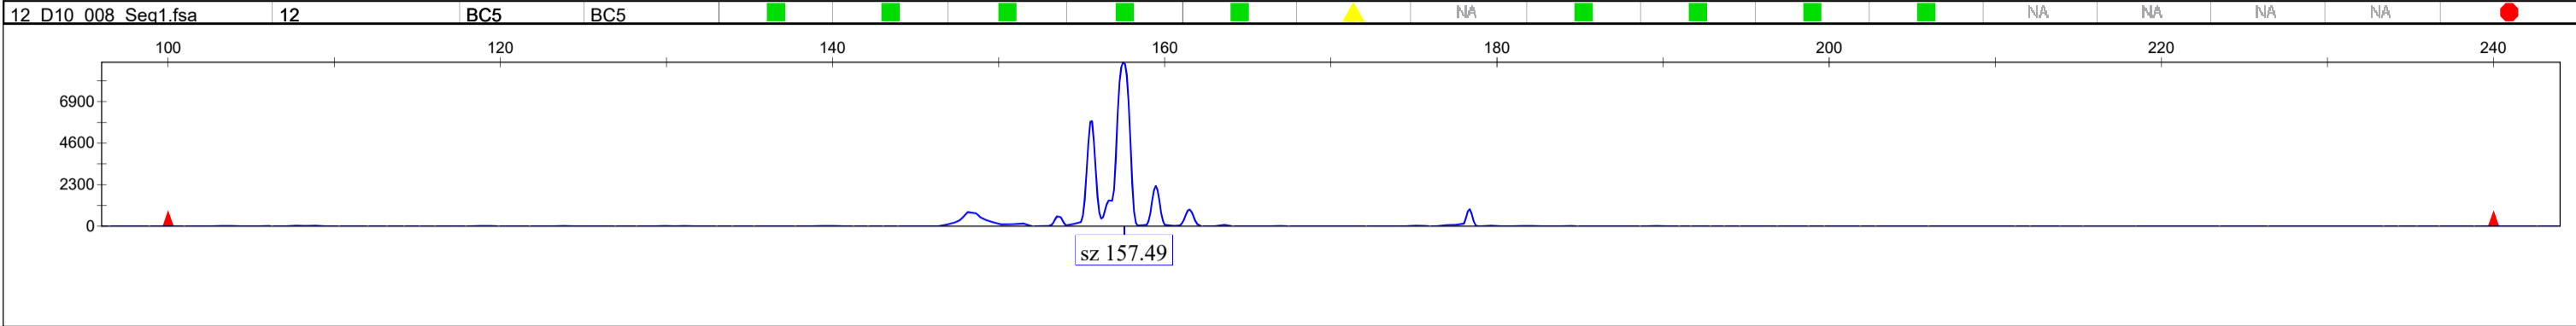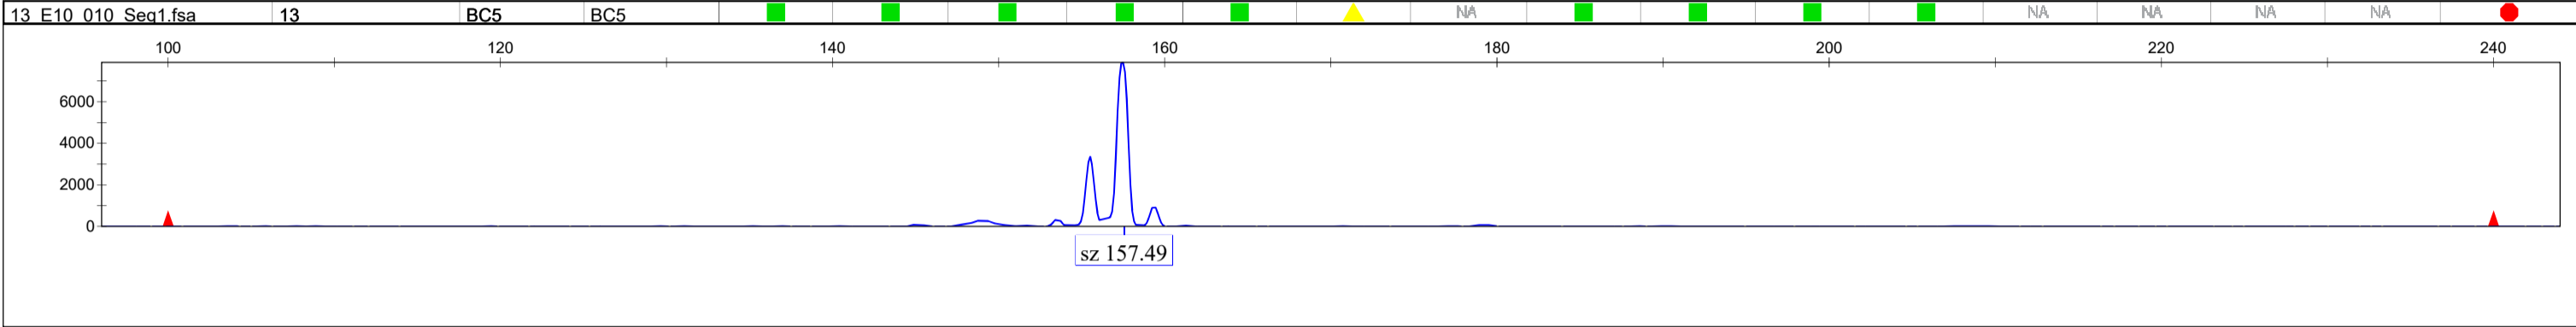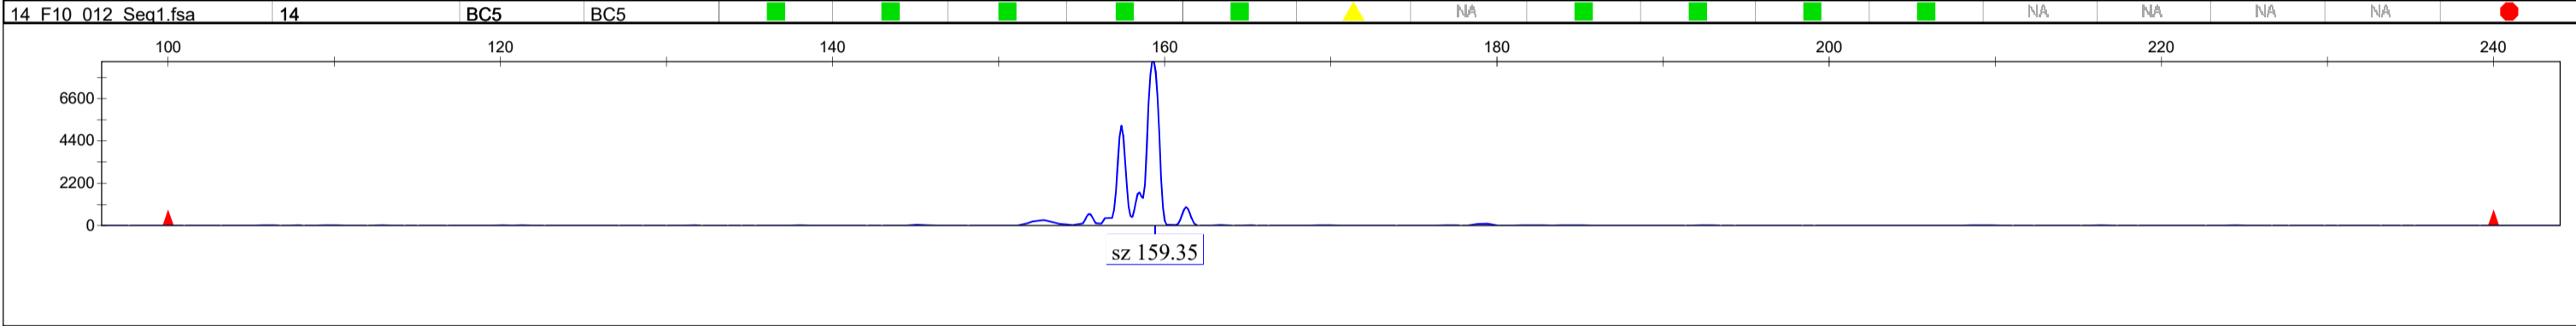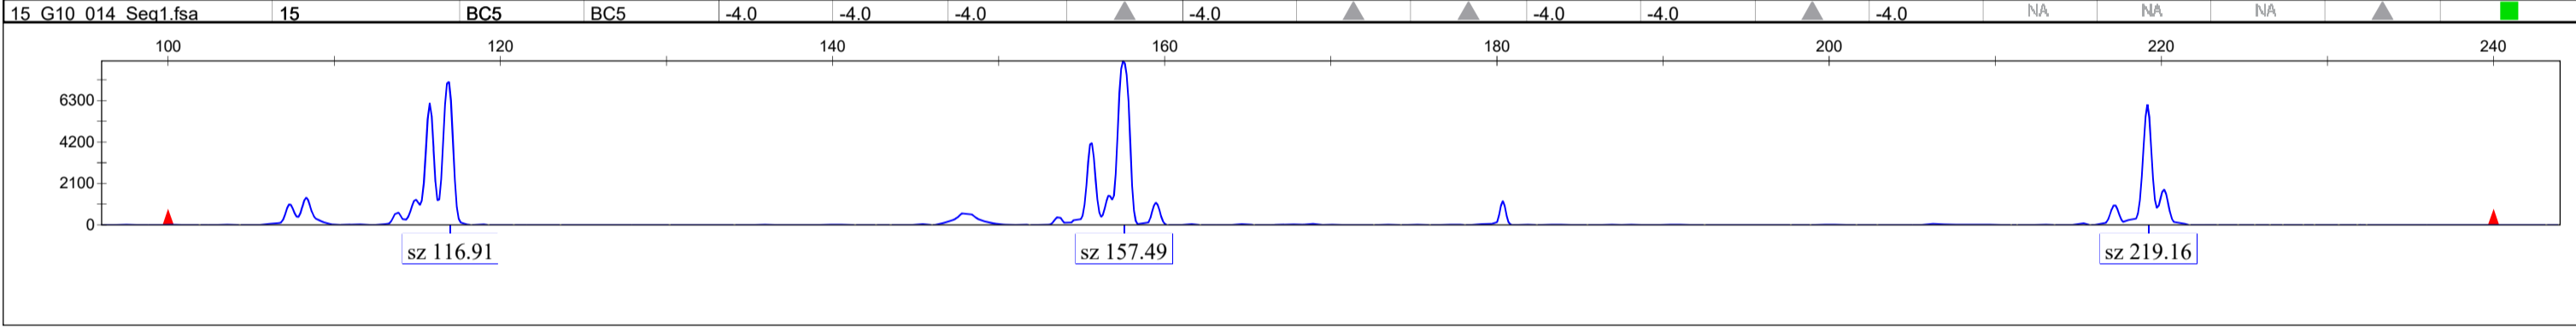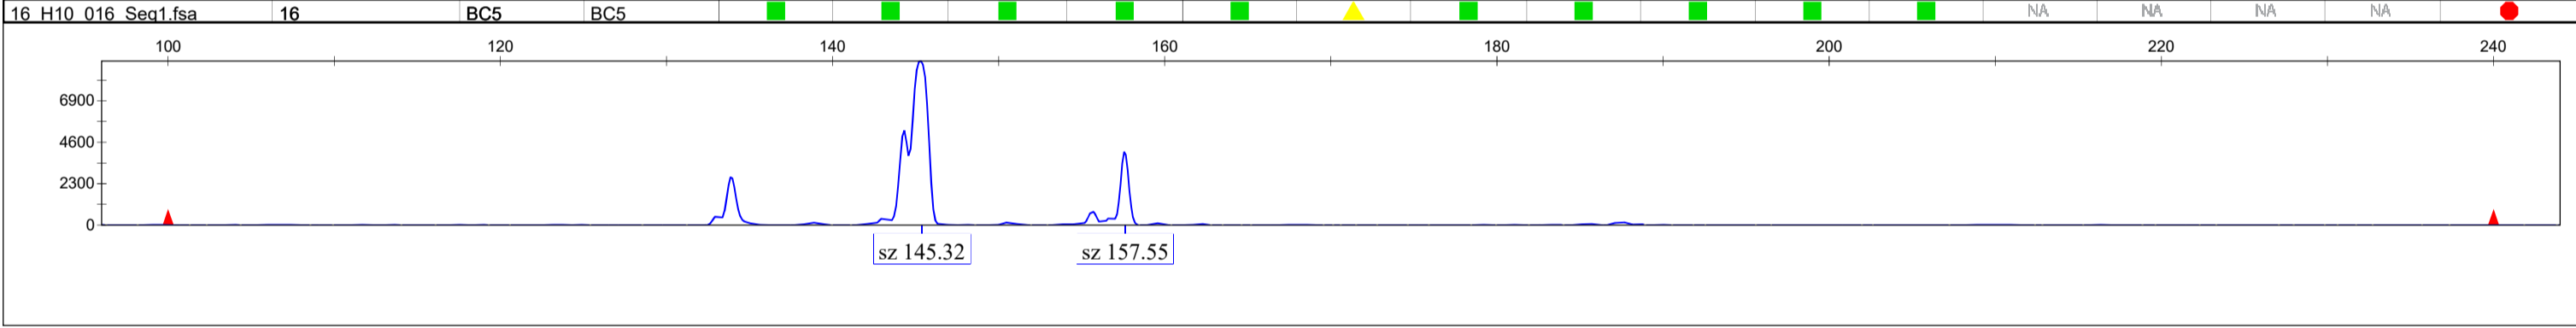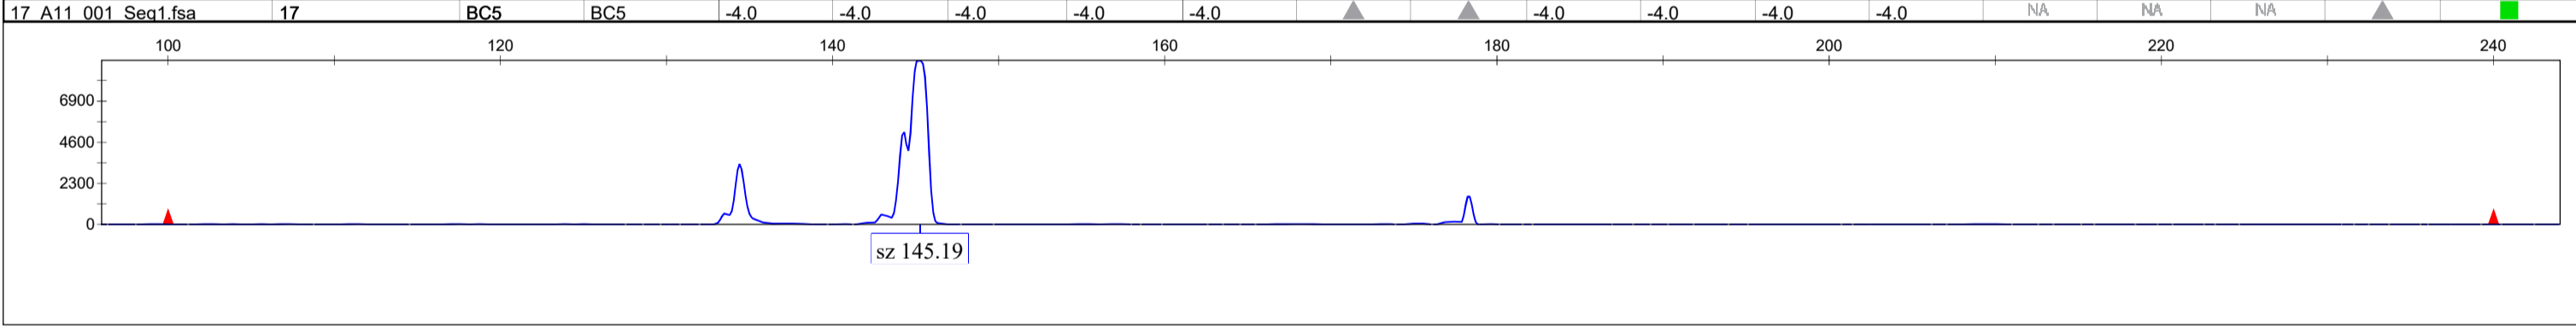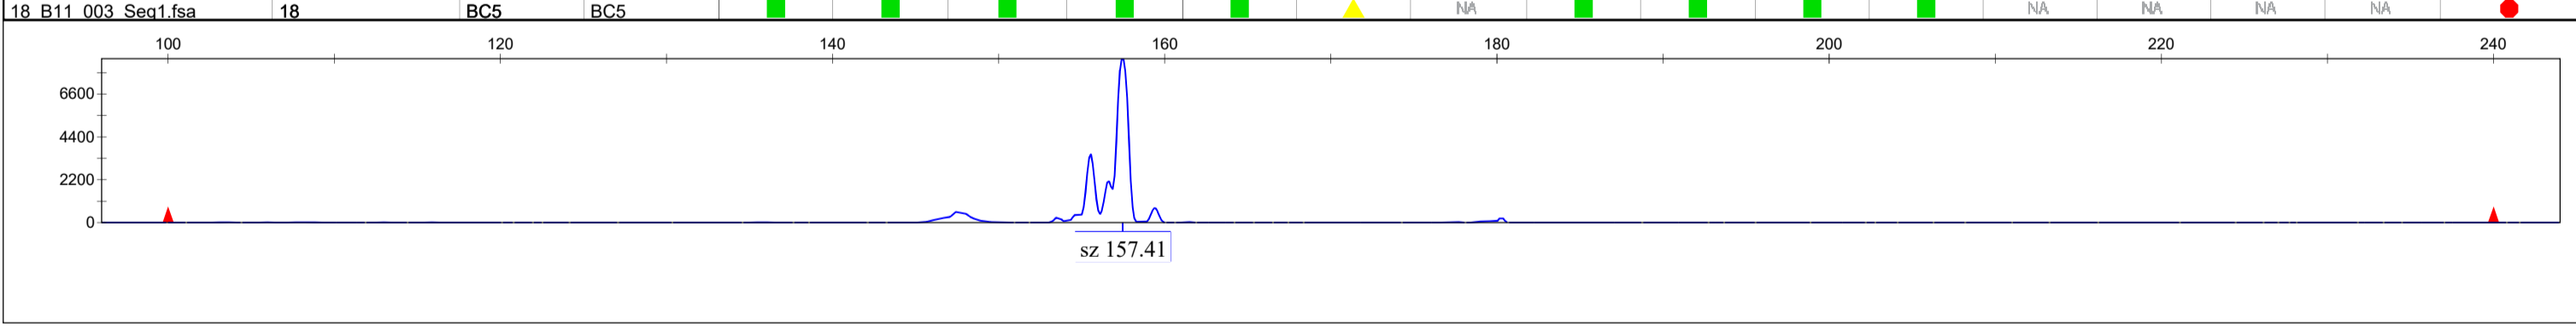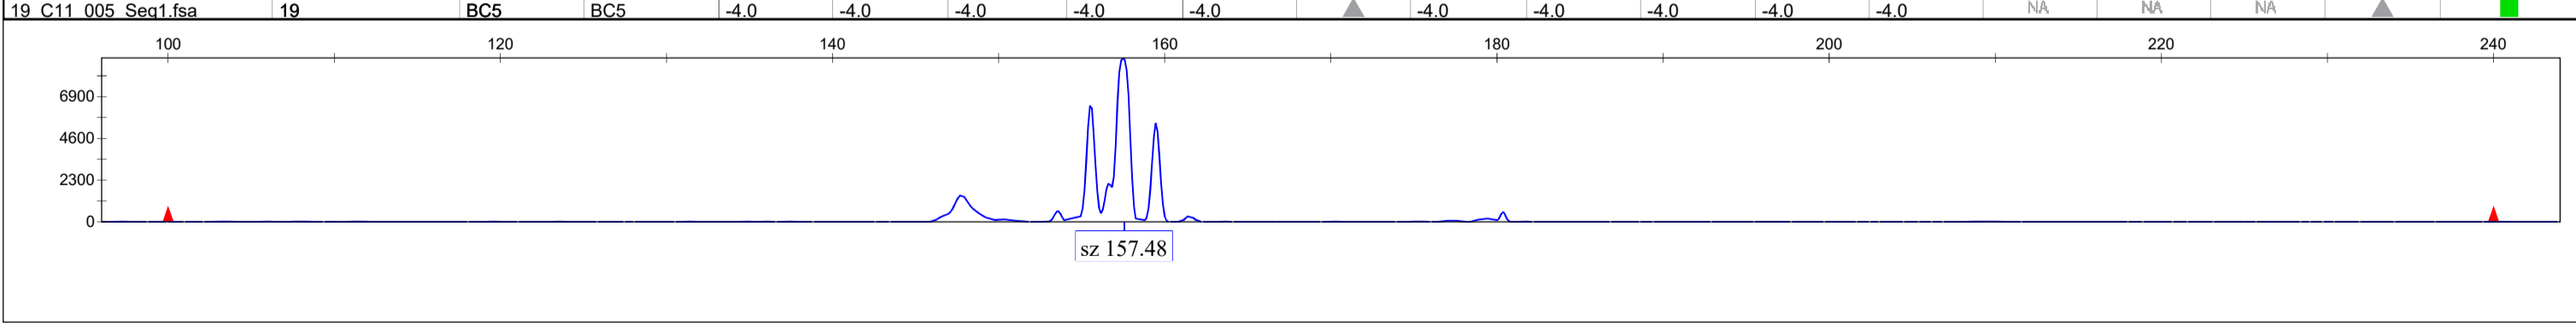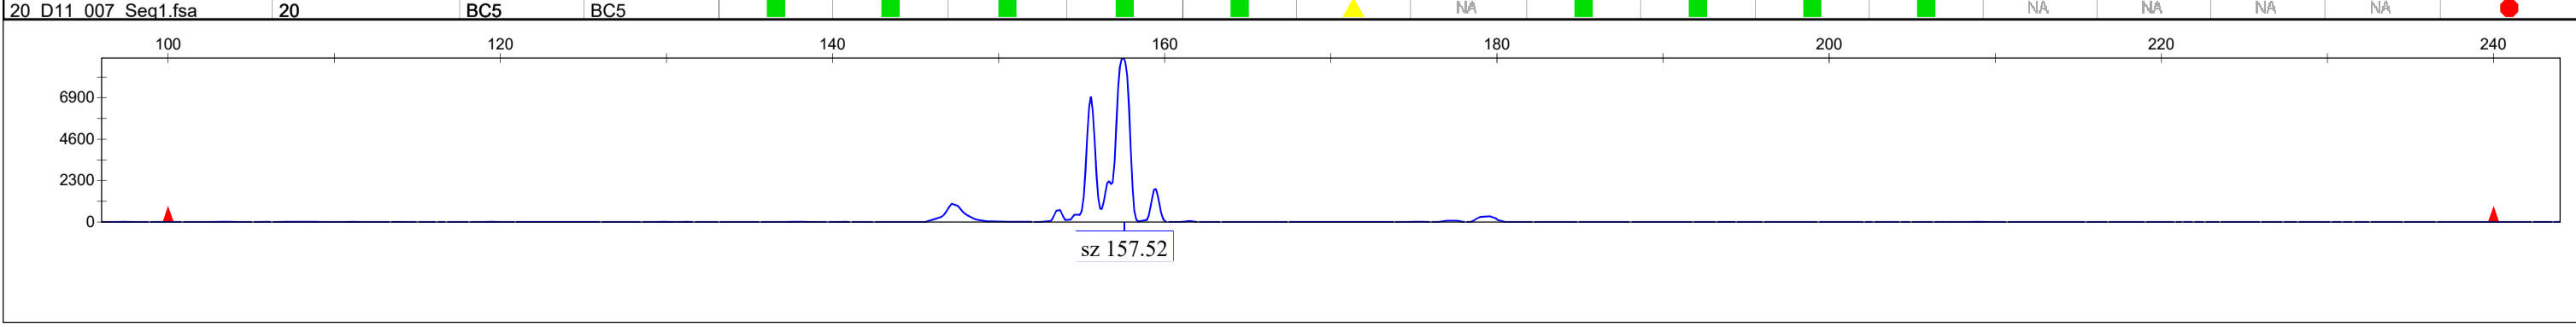

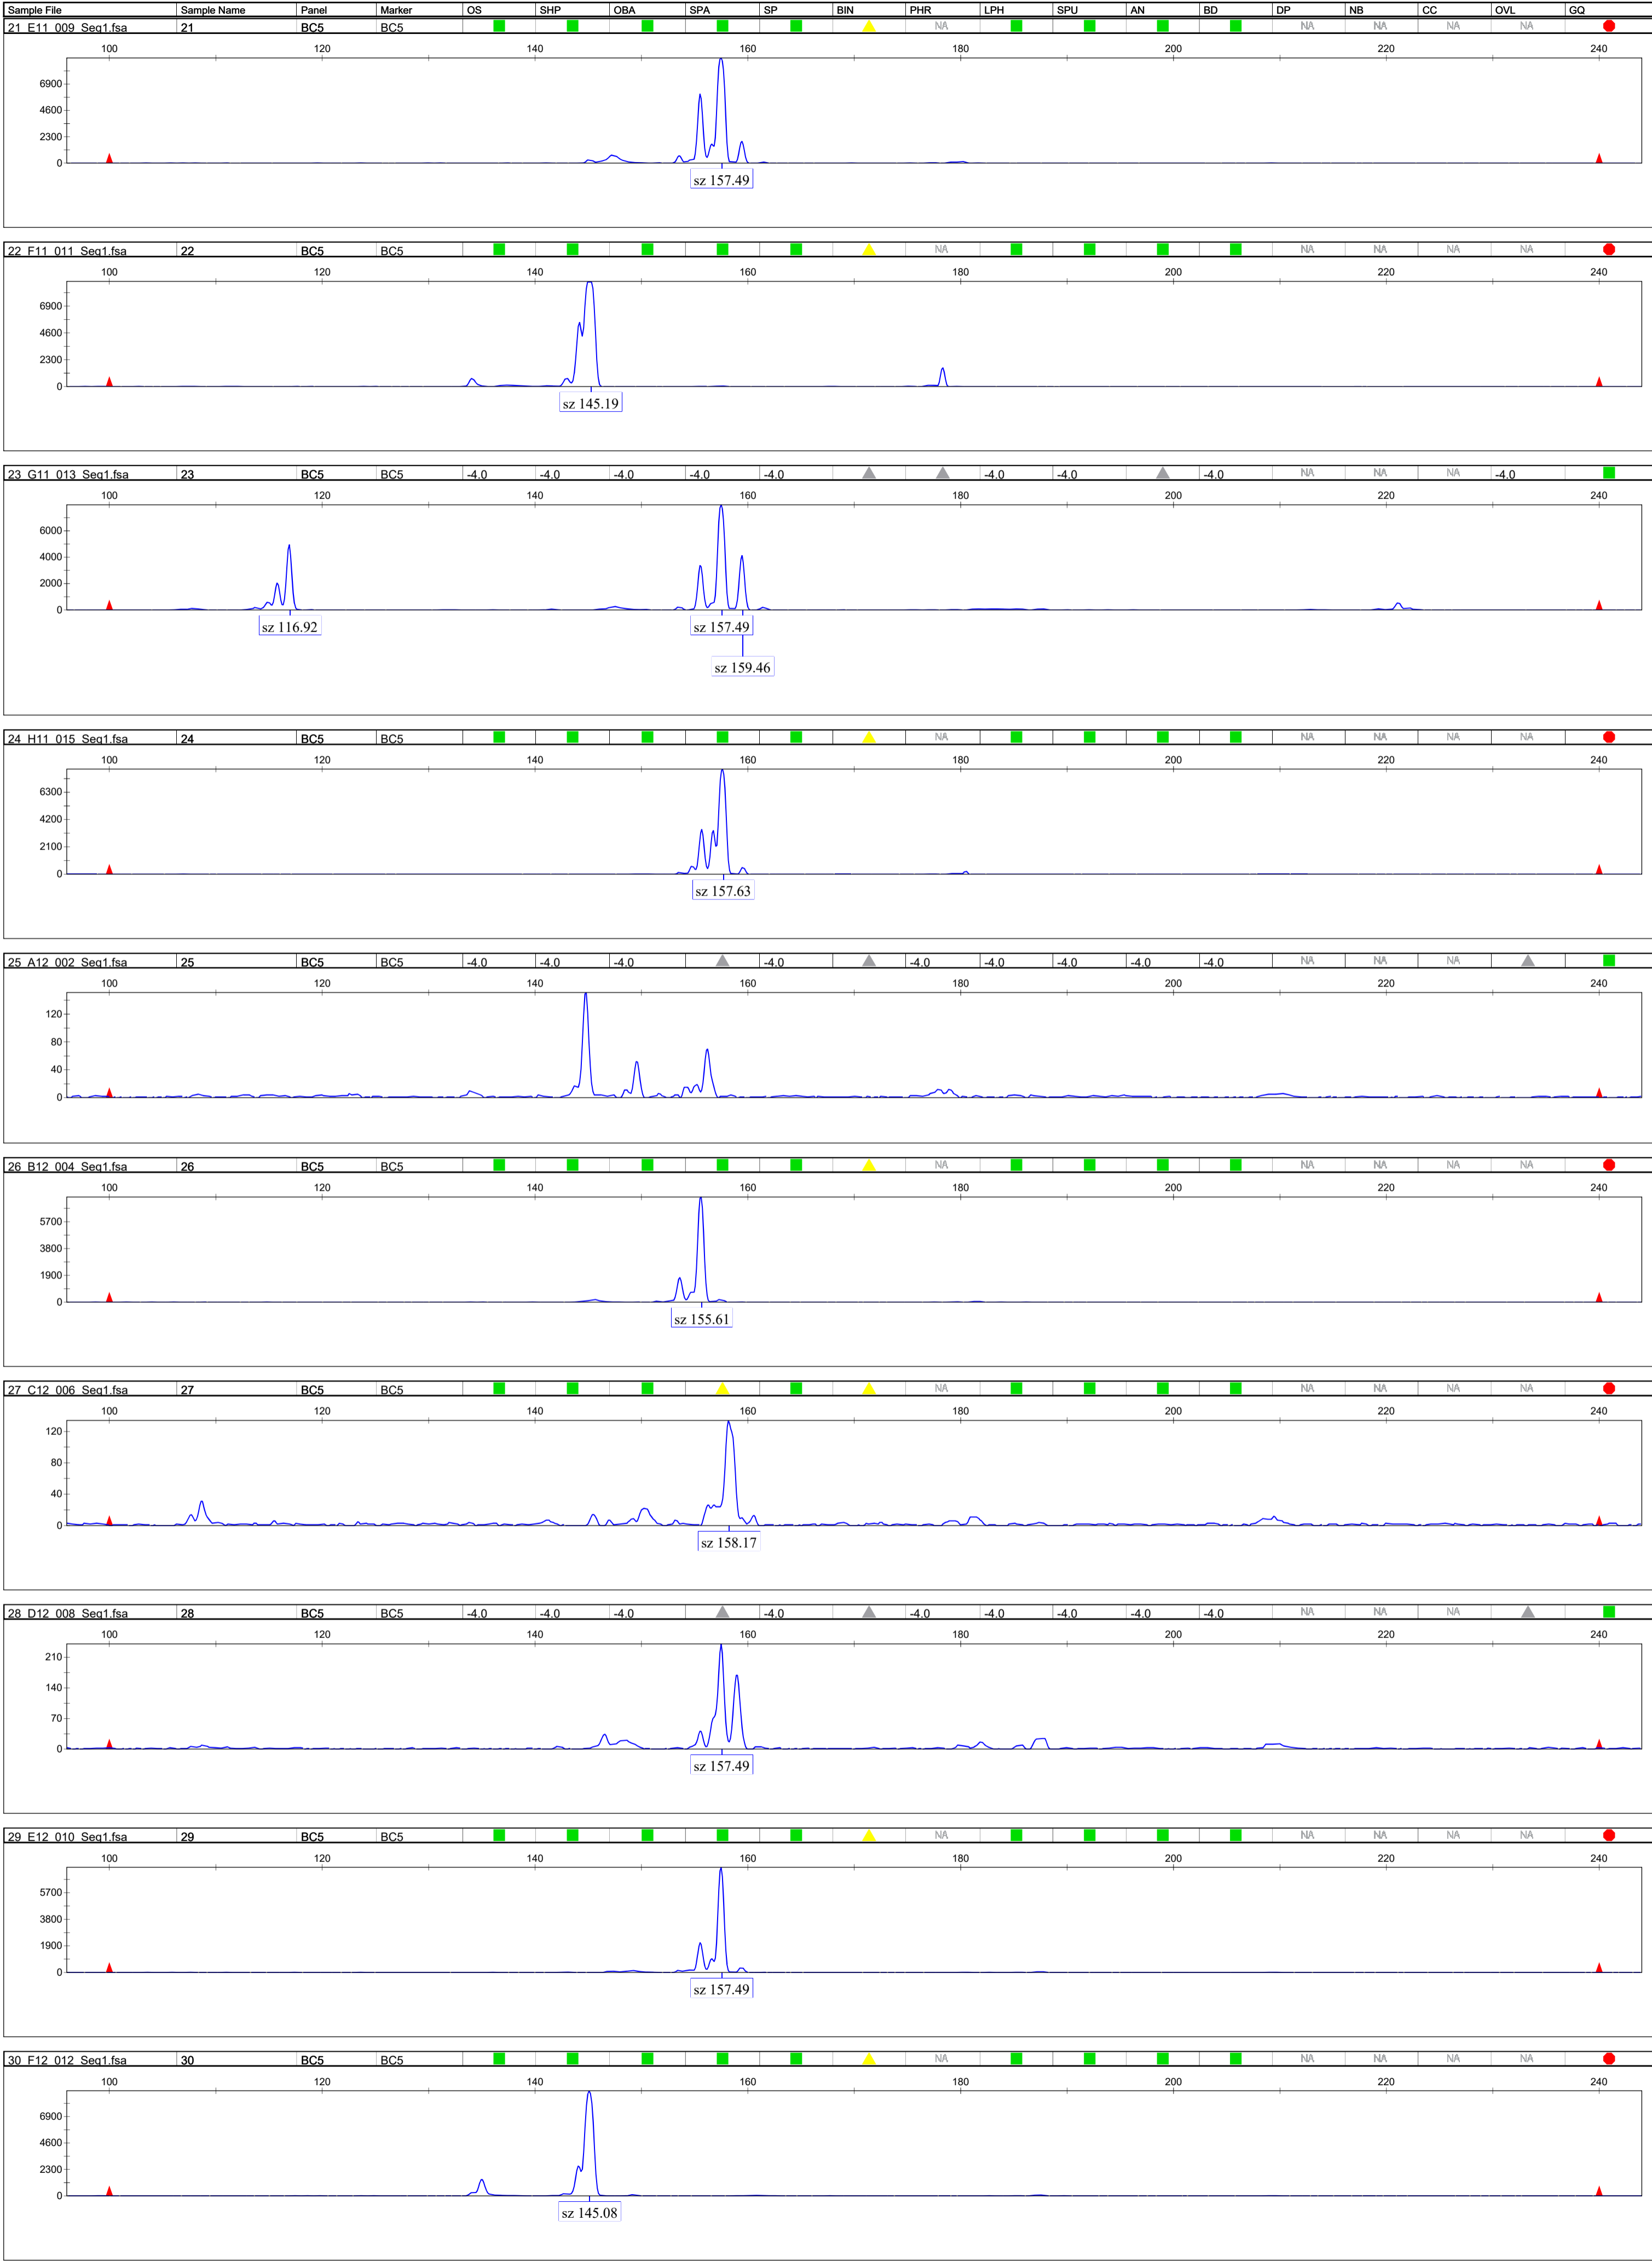

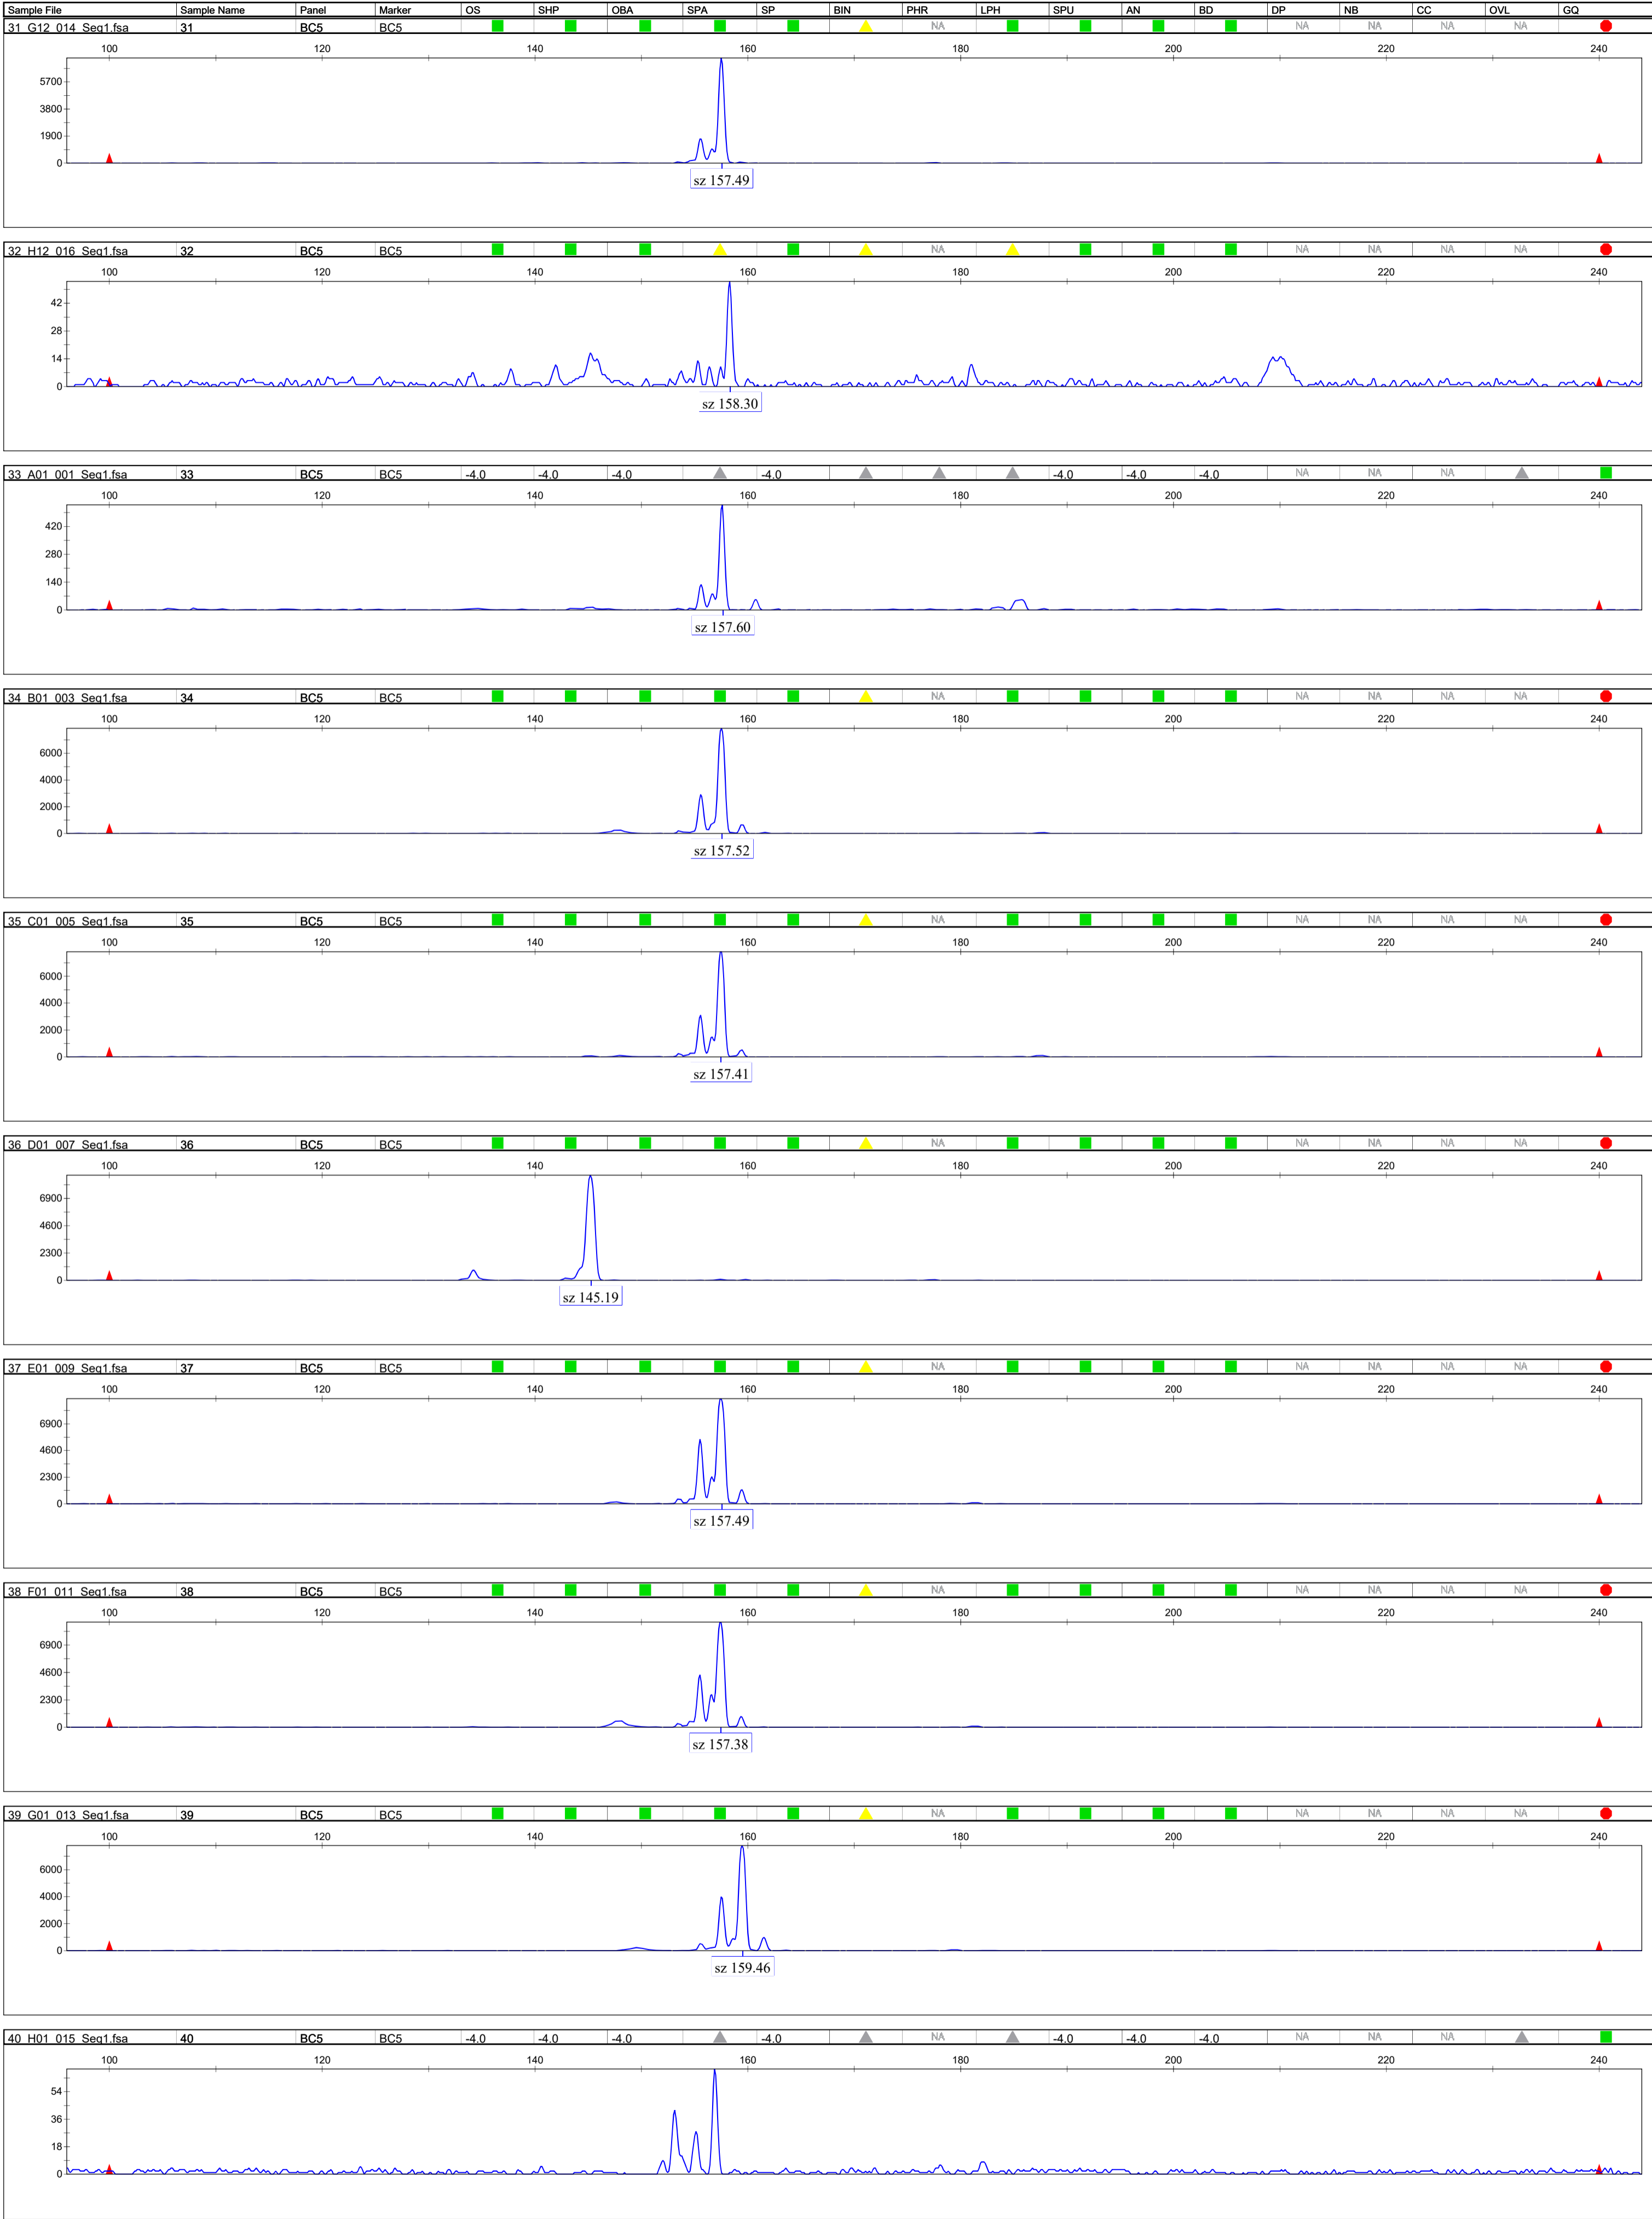

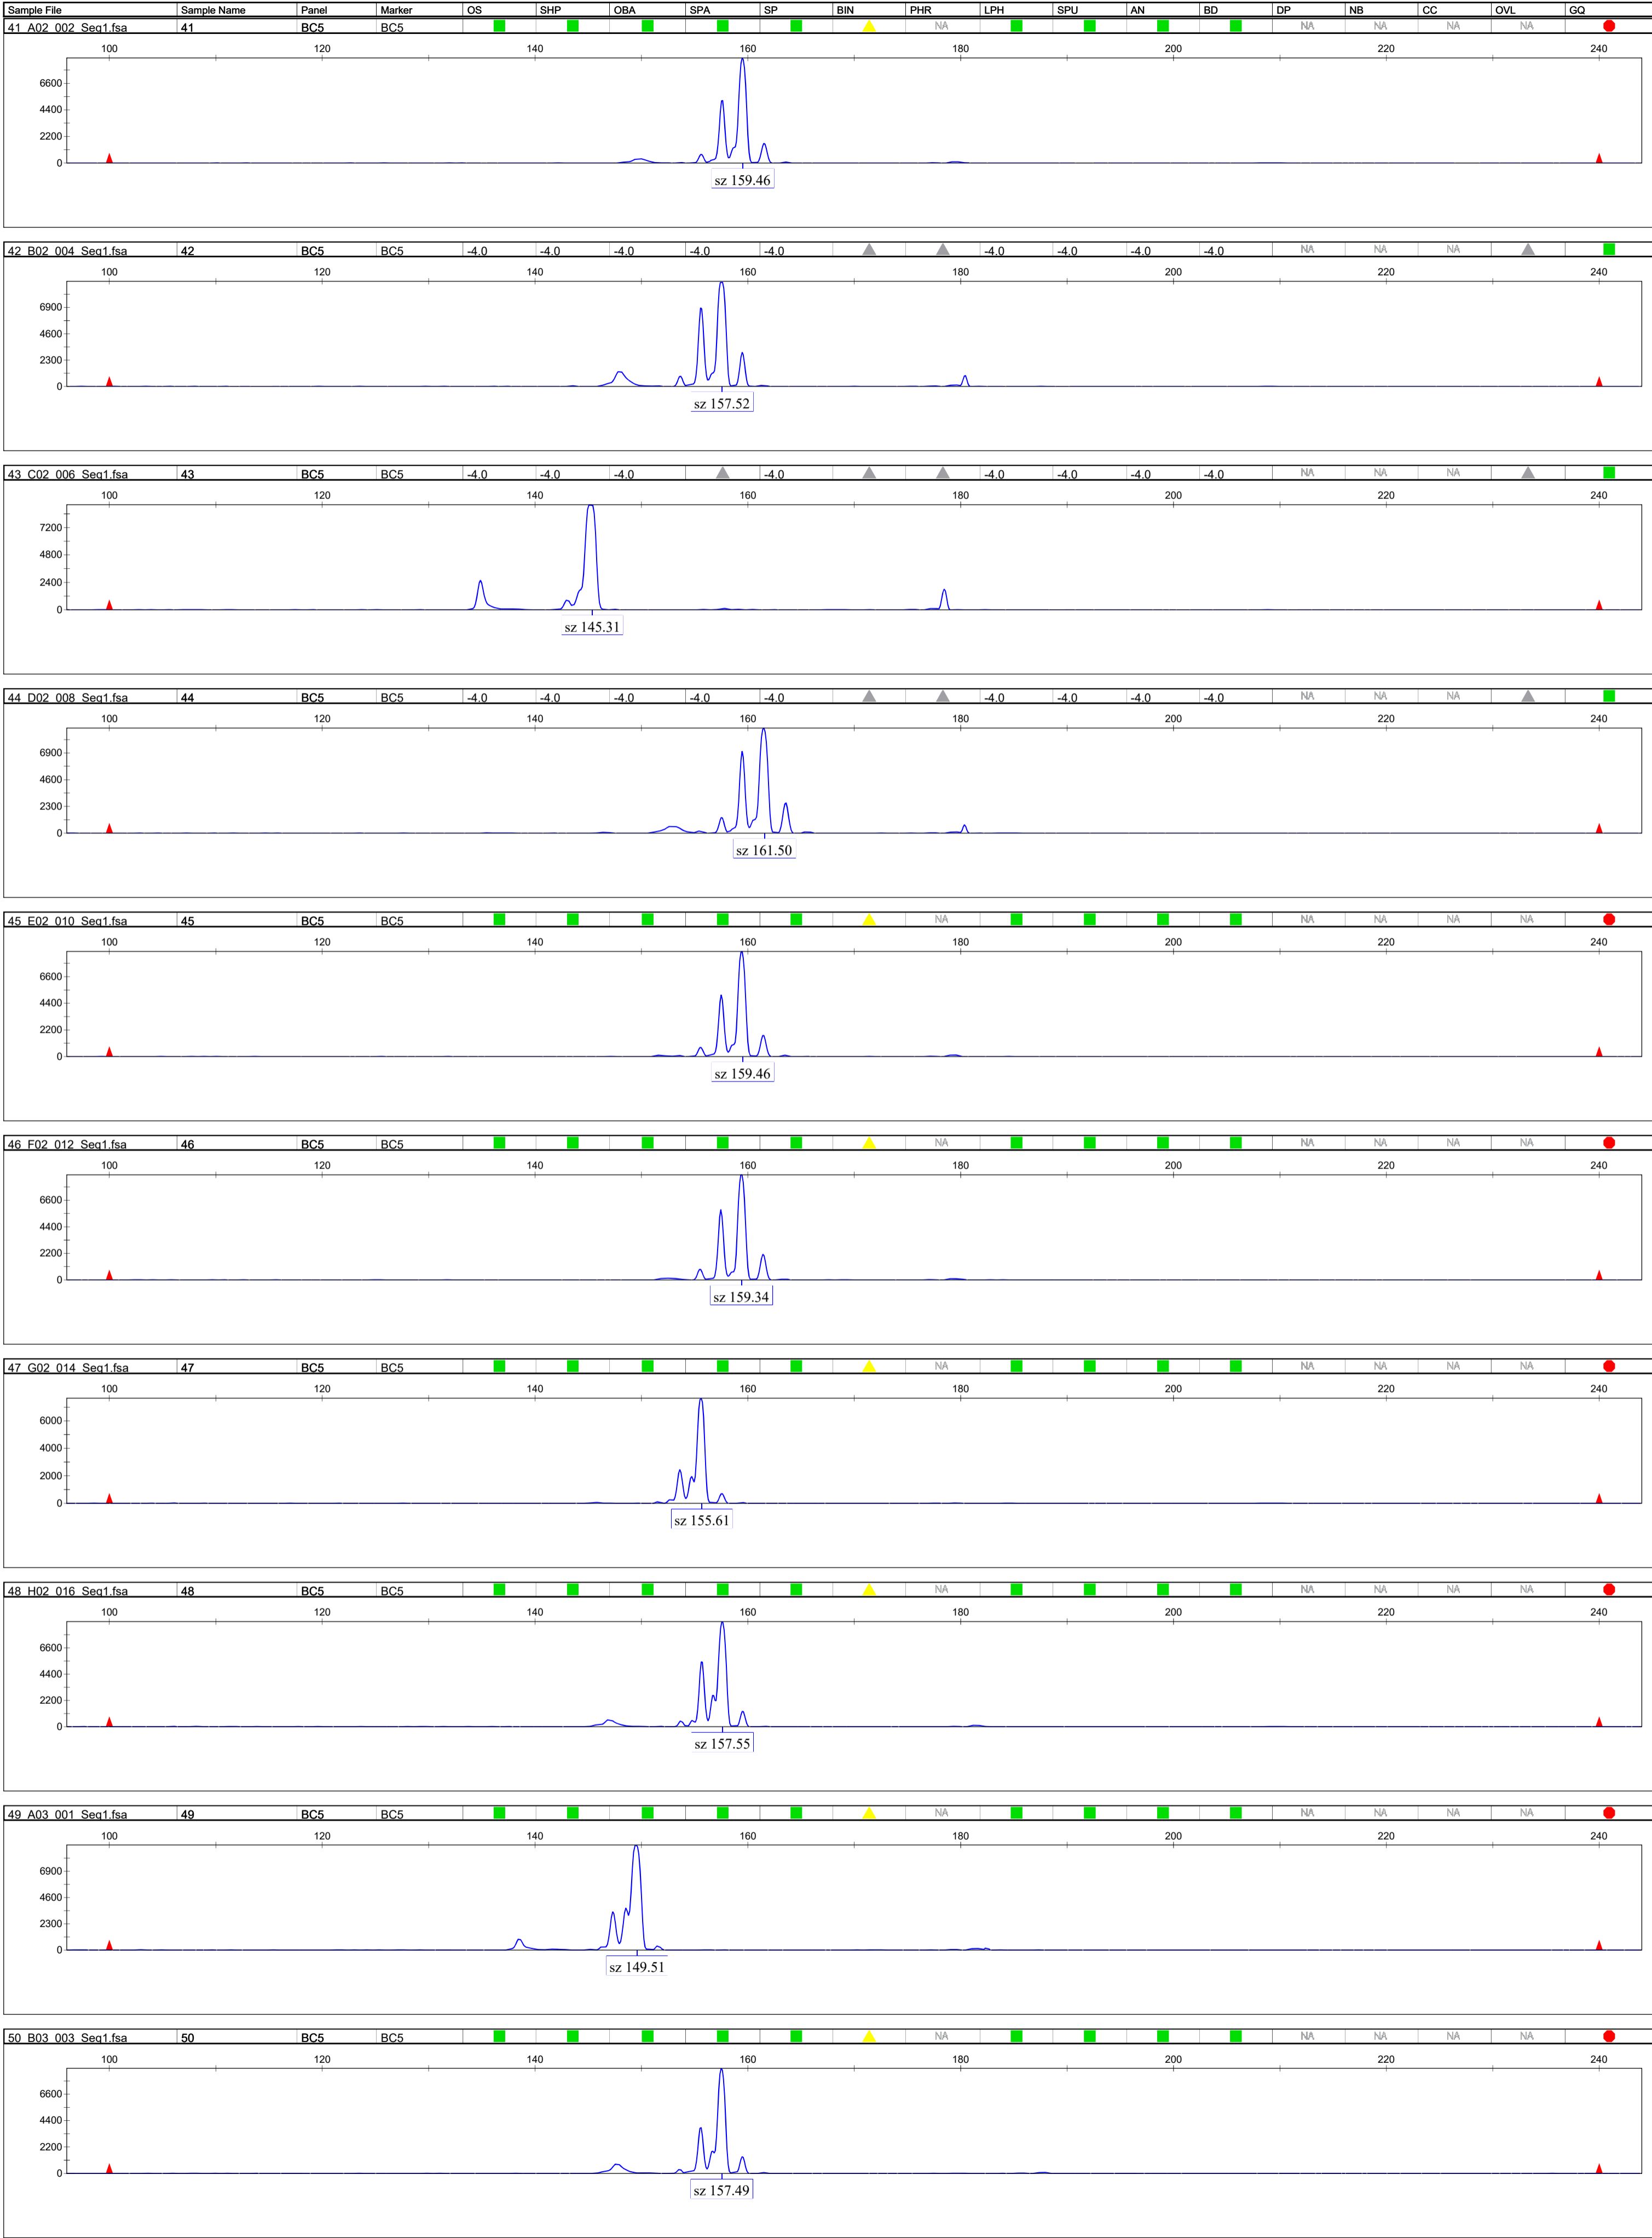

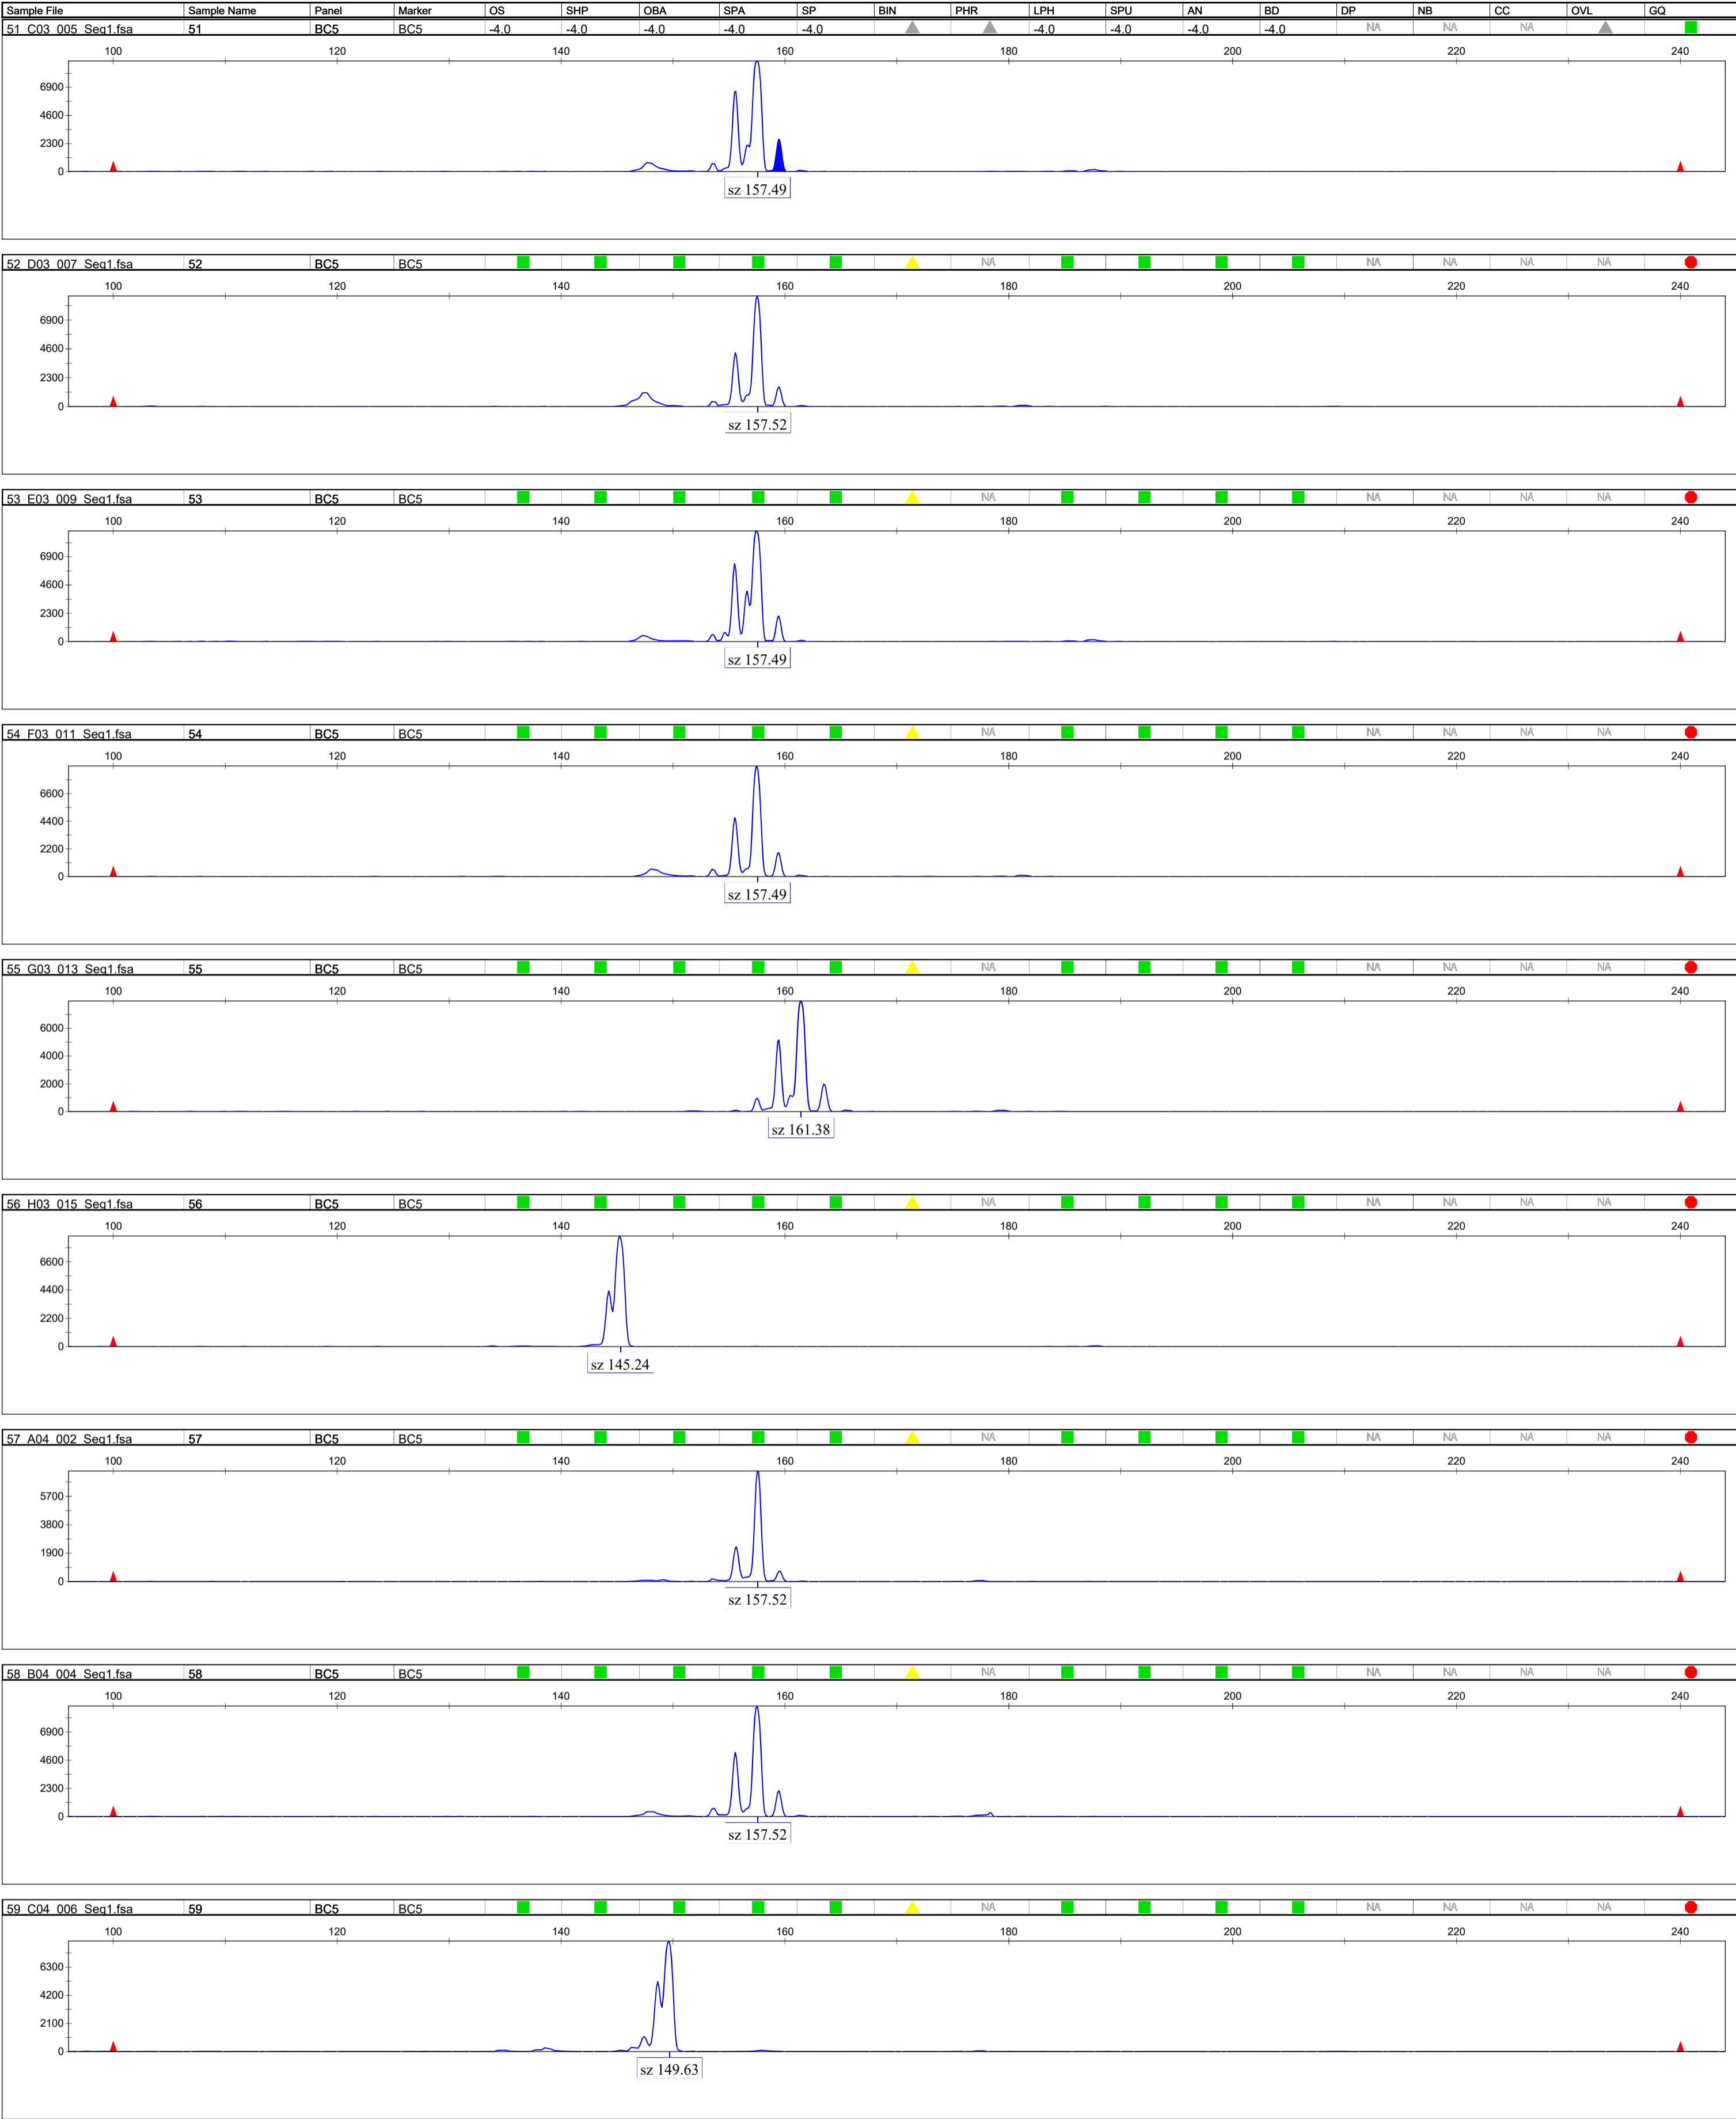

Supplement: s1 [file s1 › BC5.pdf]

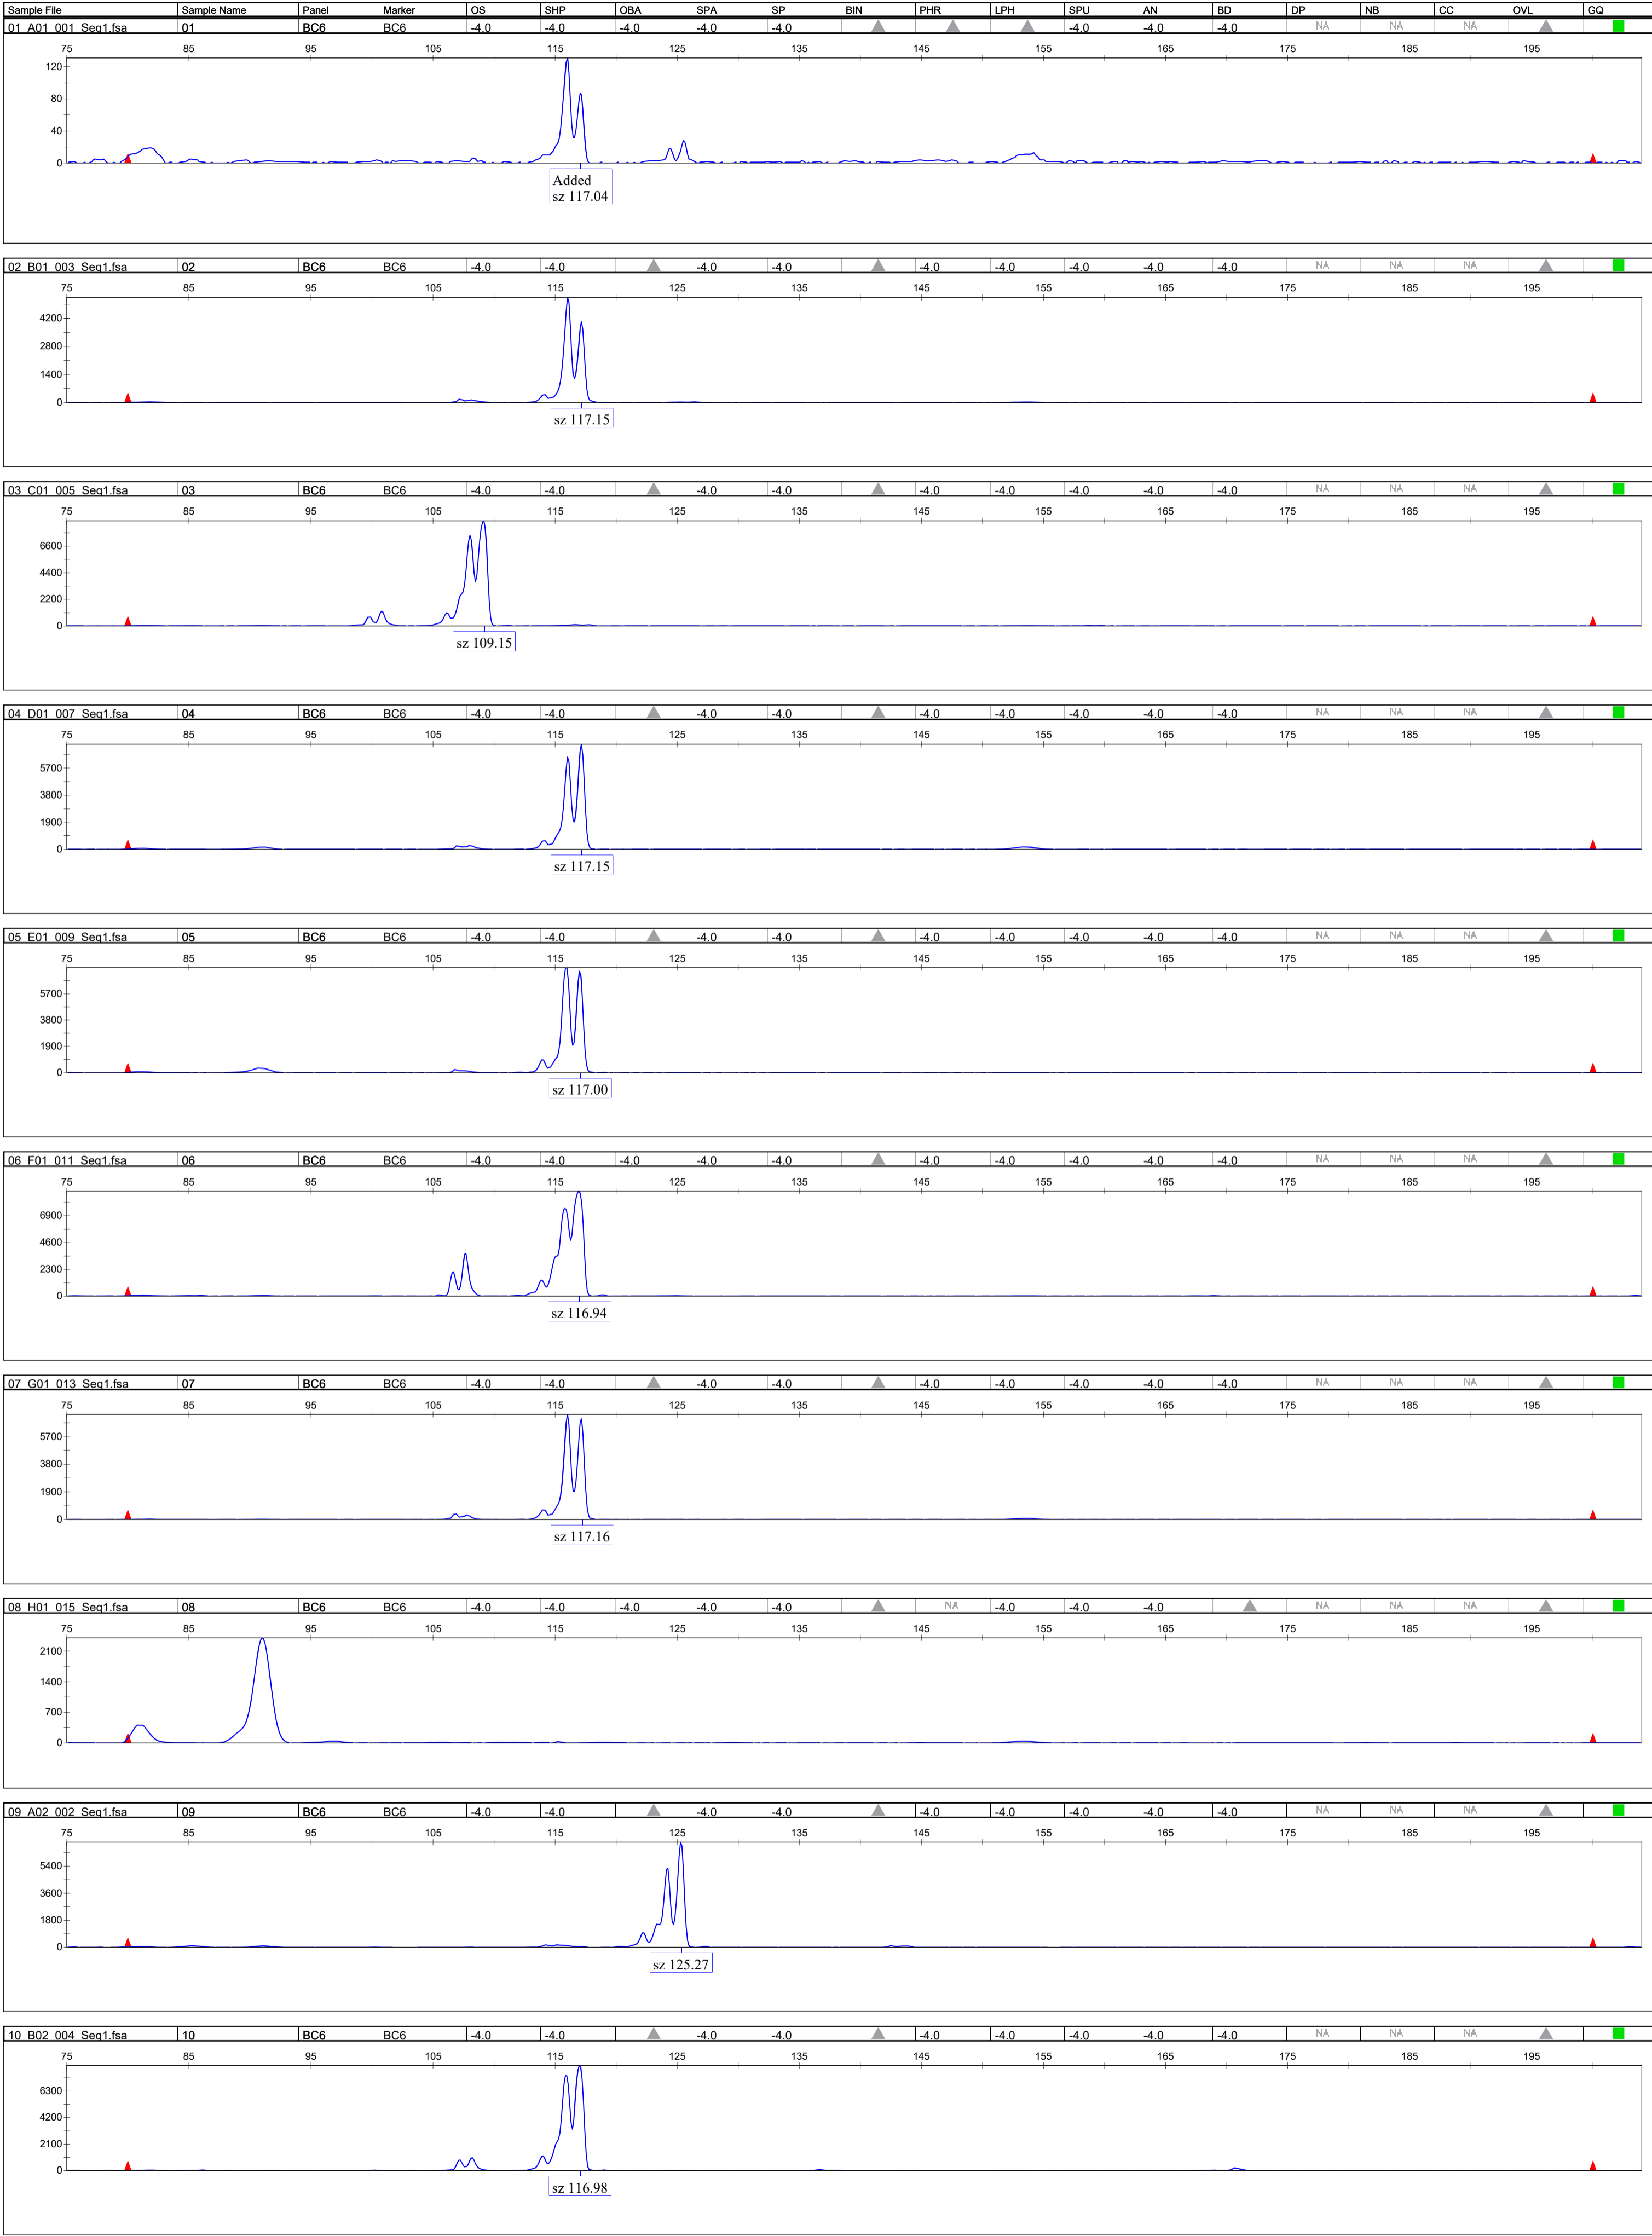

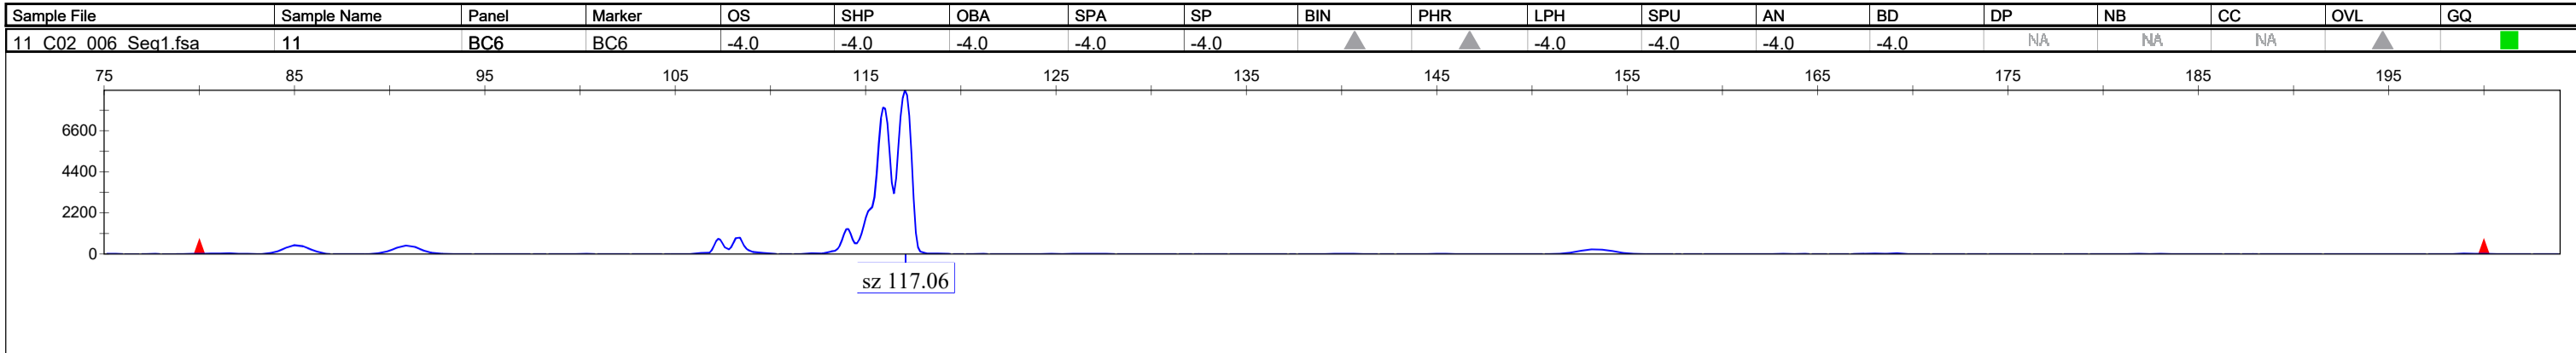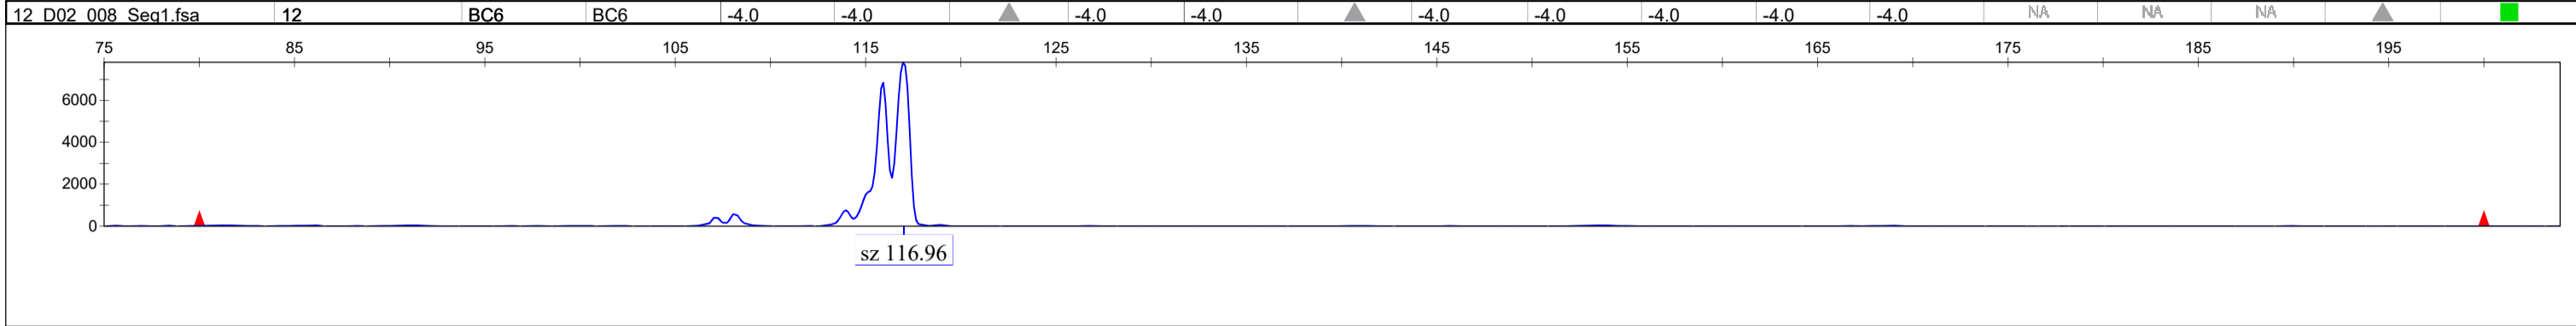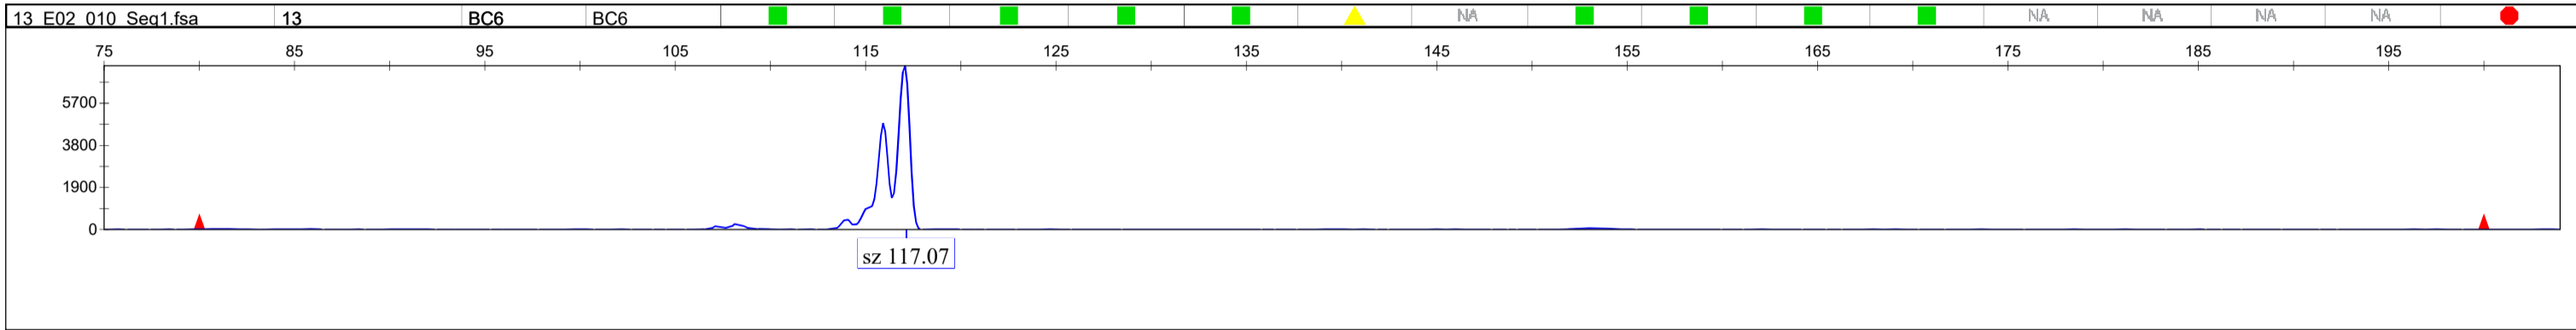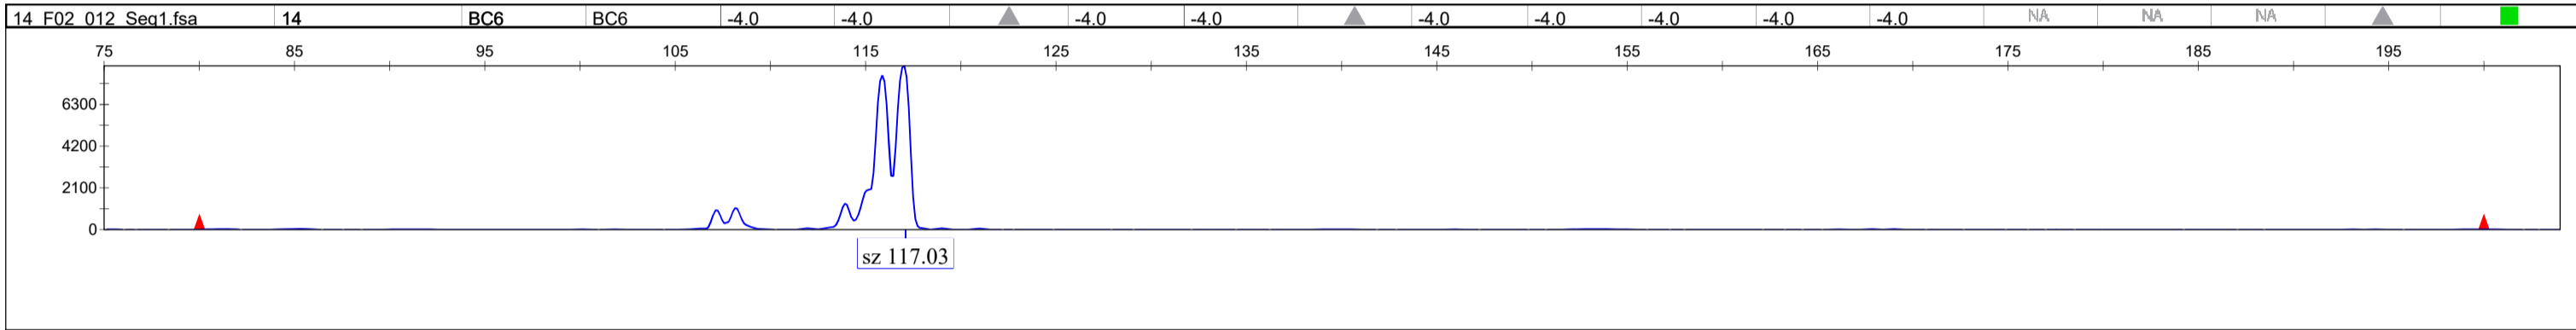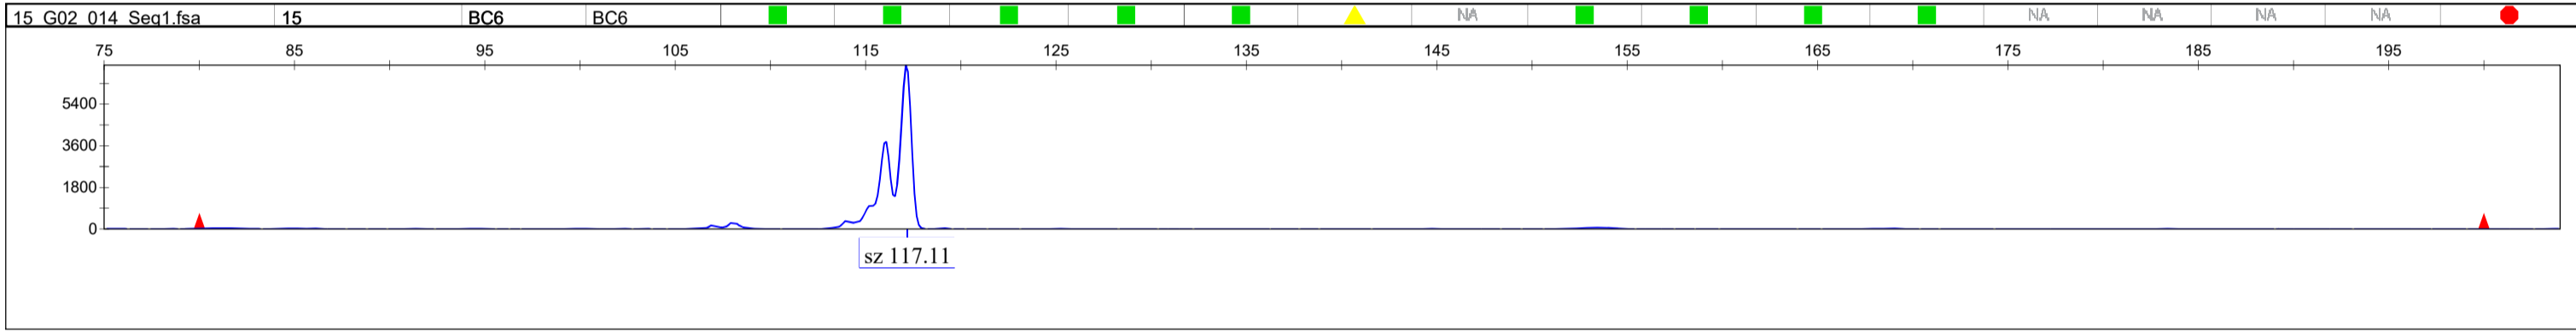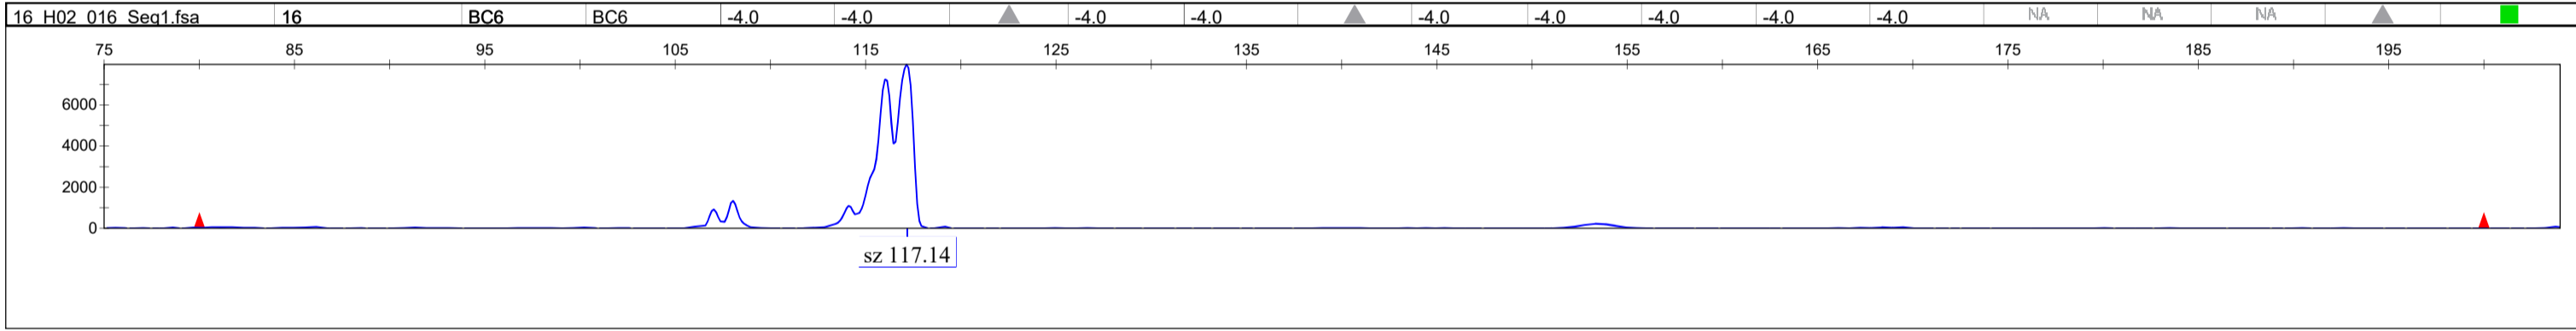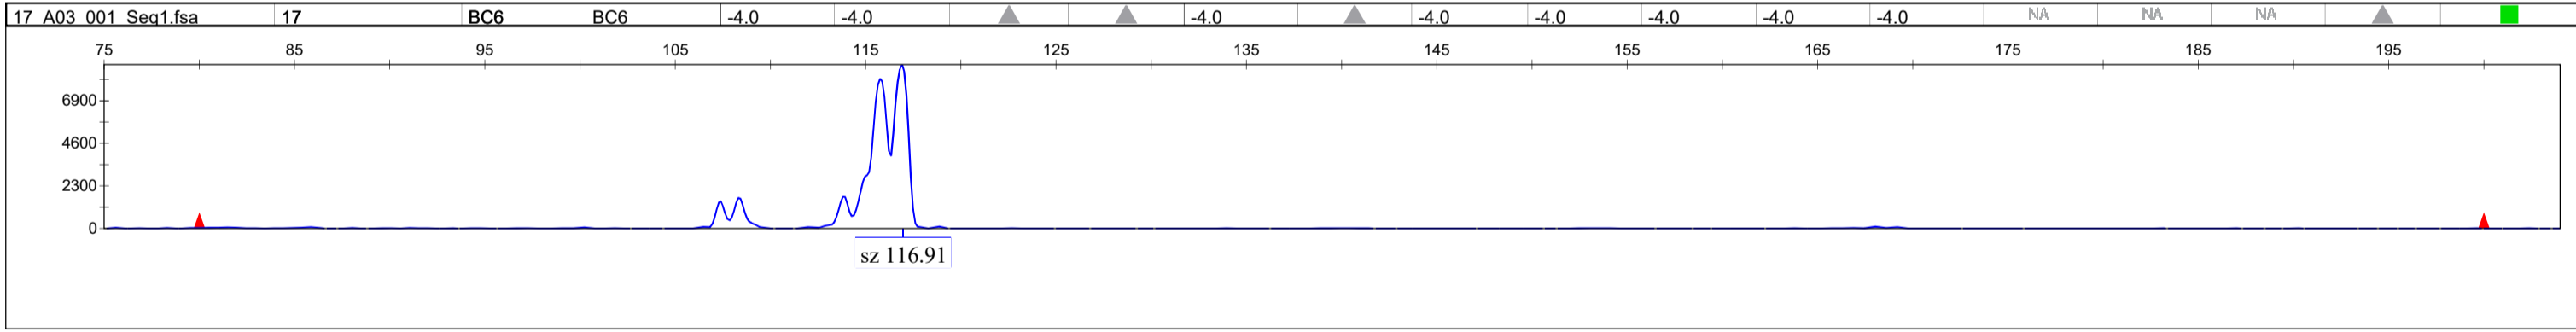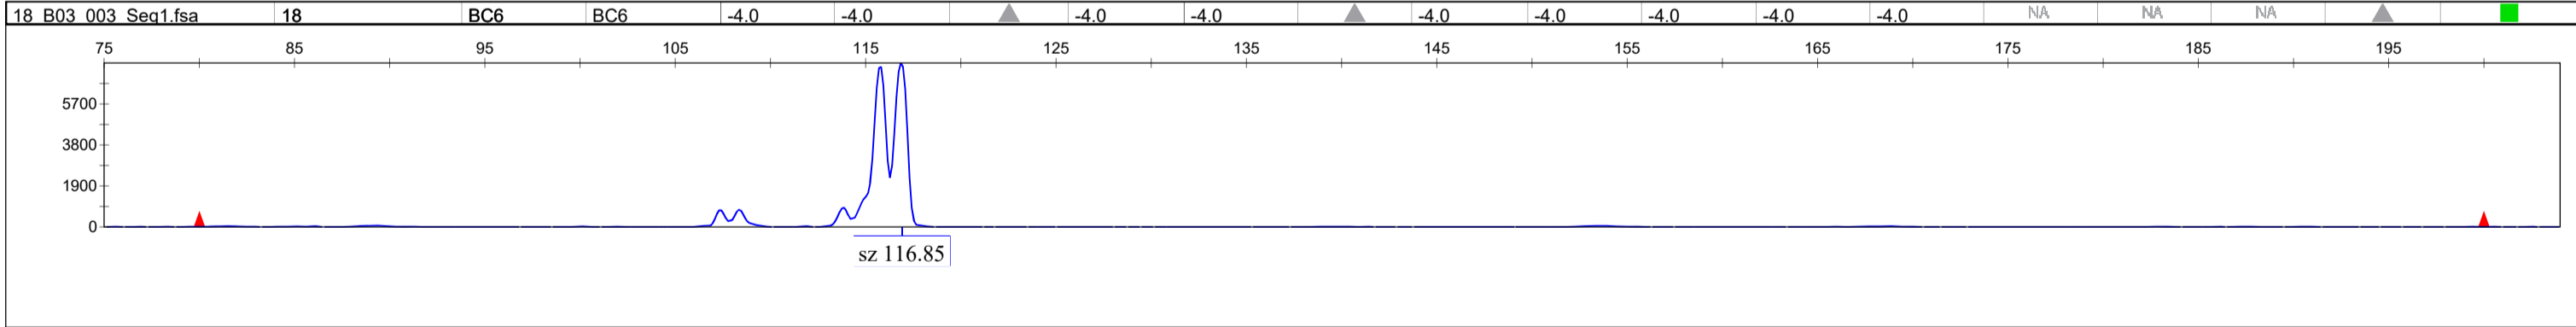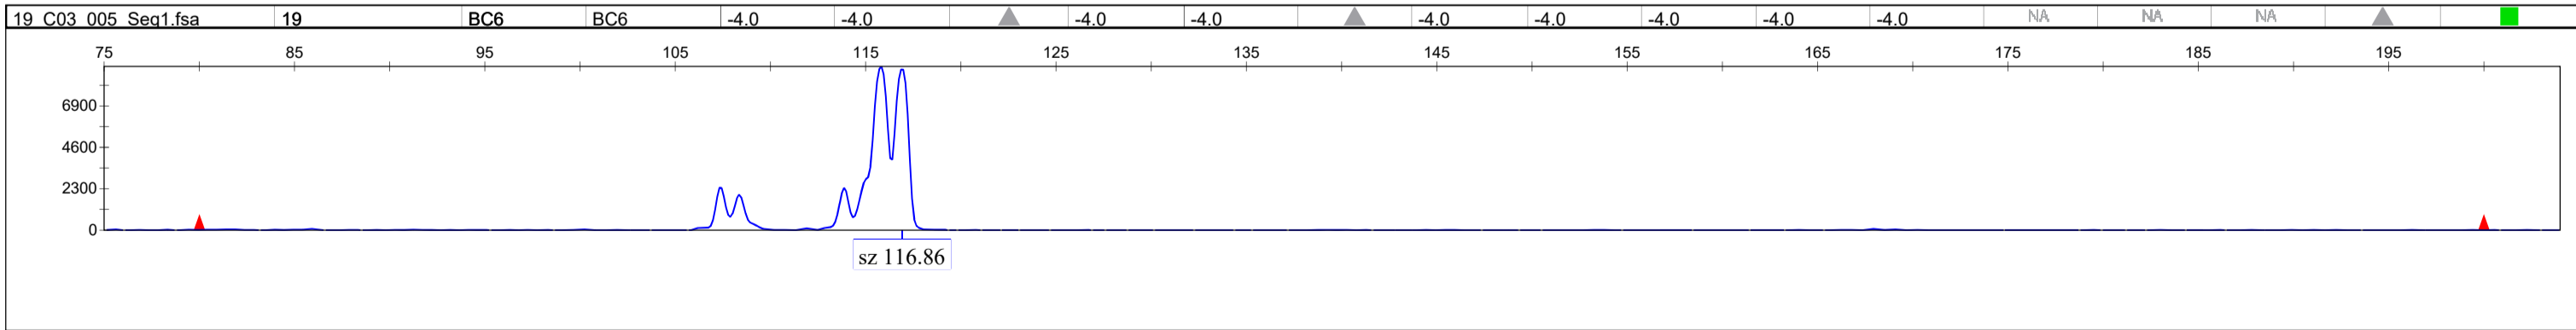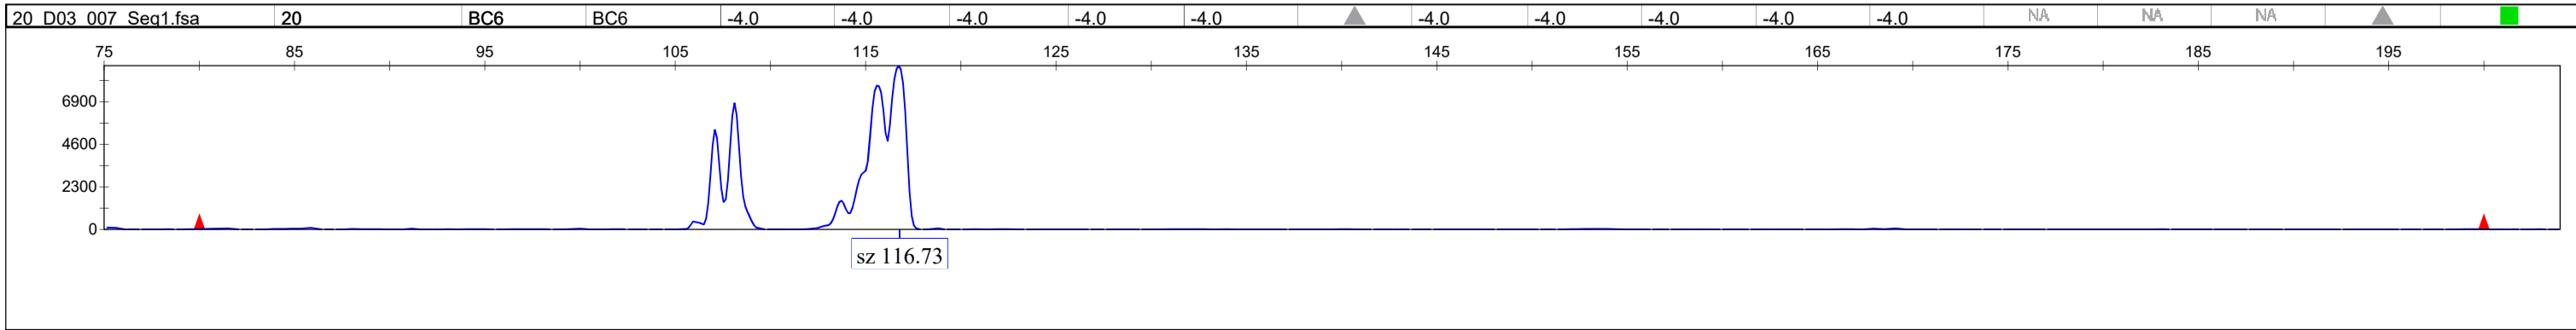

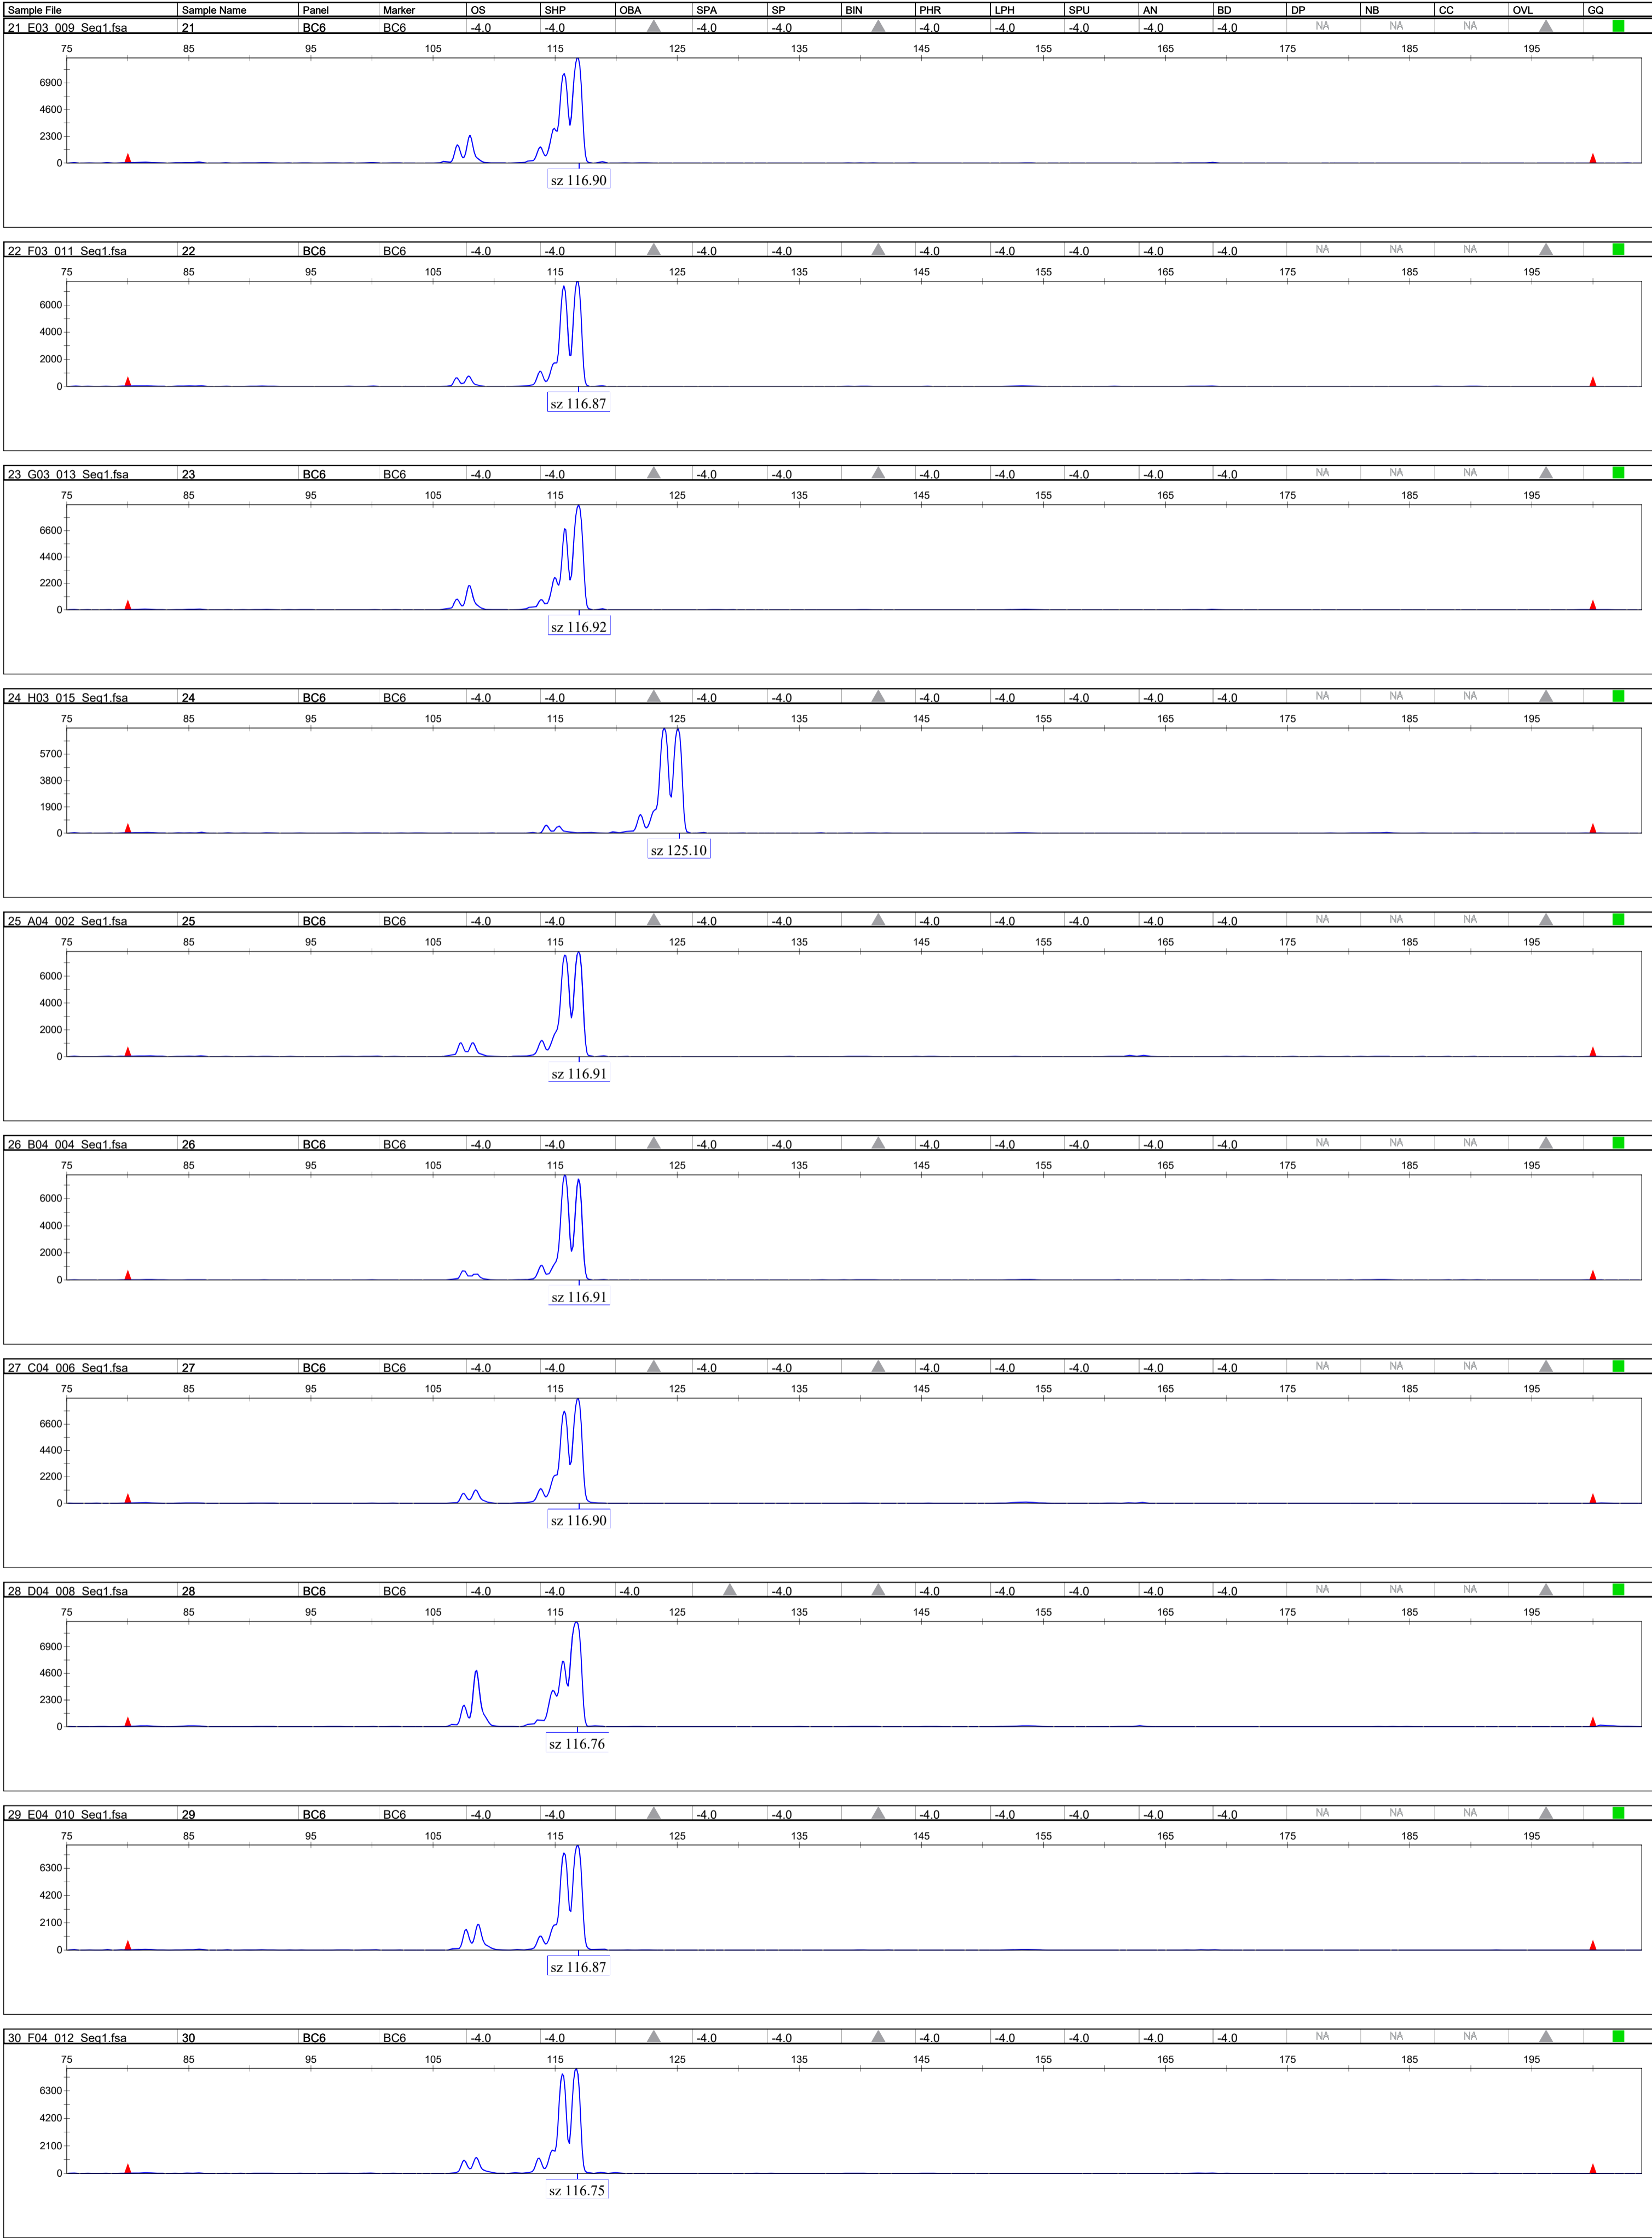

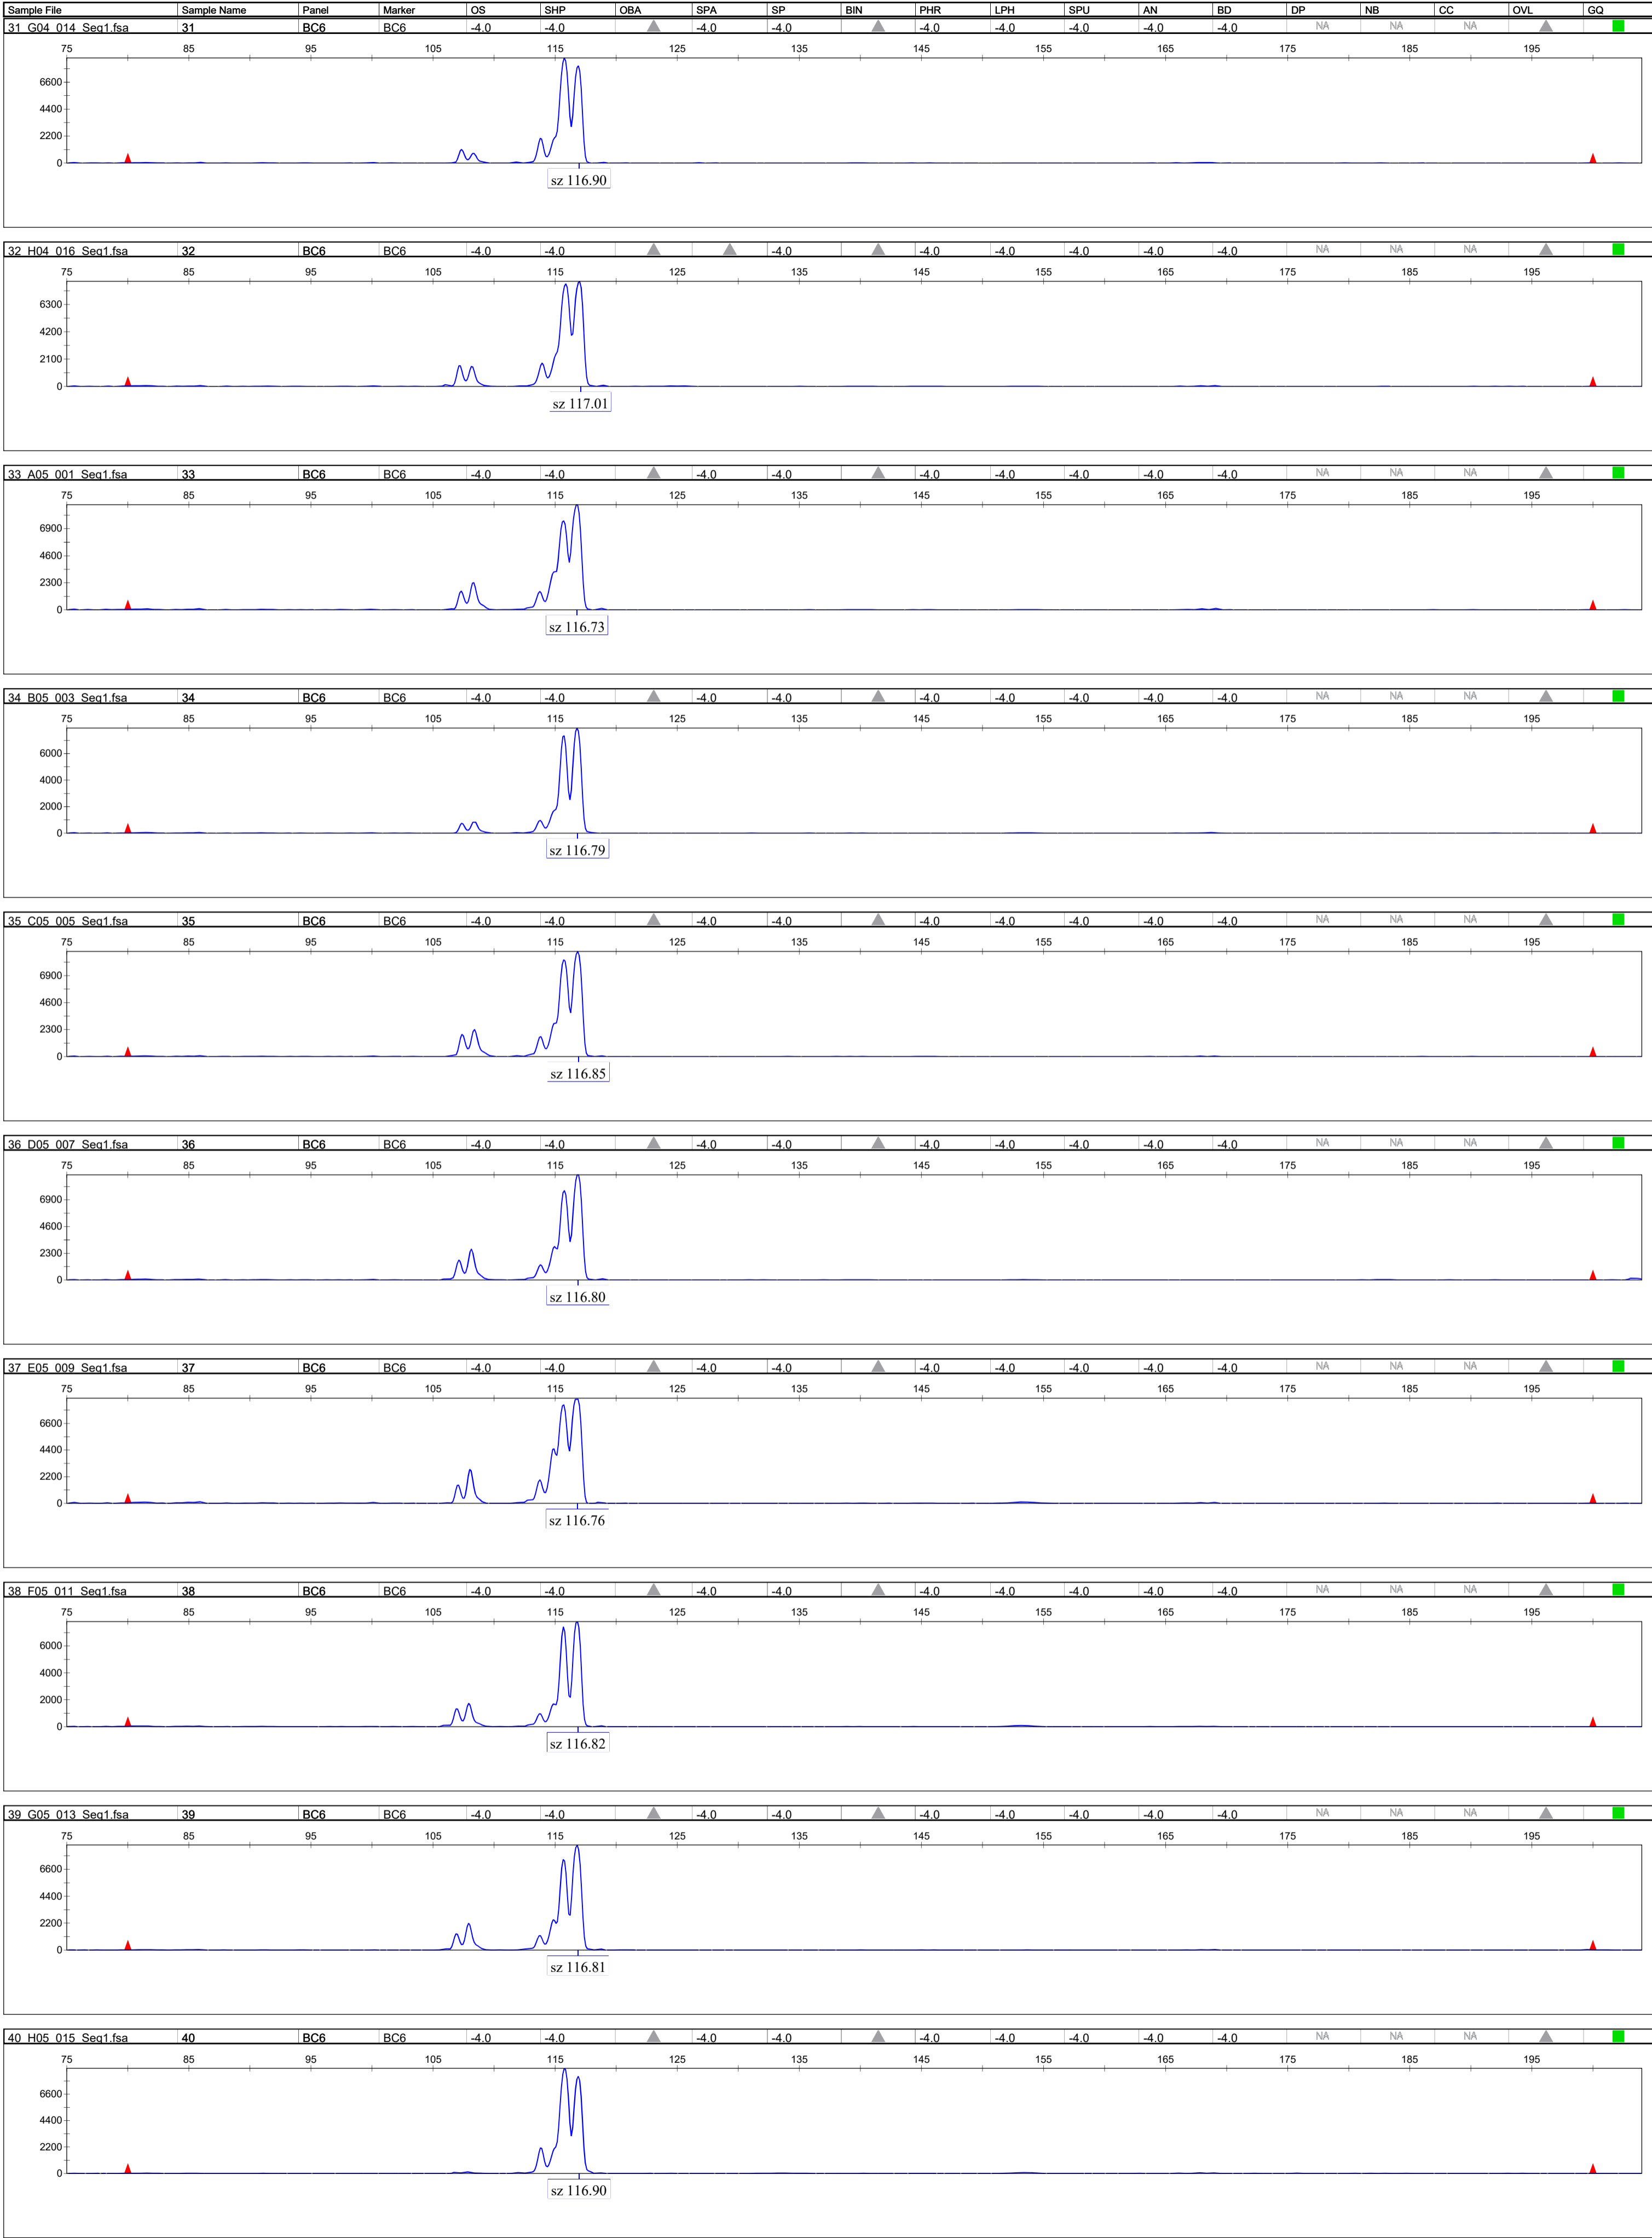

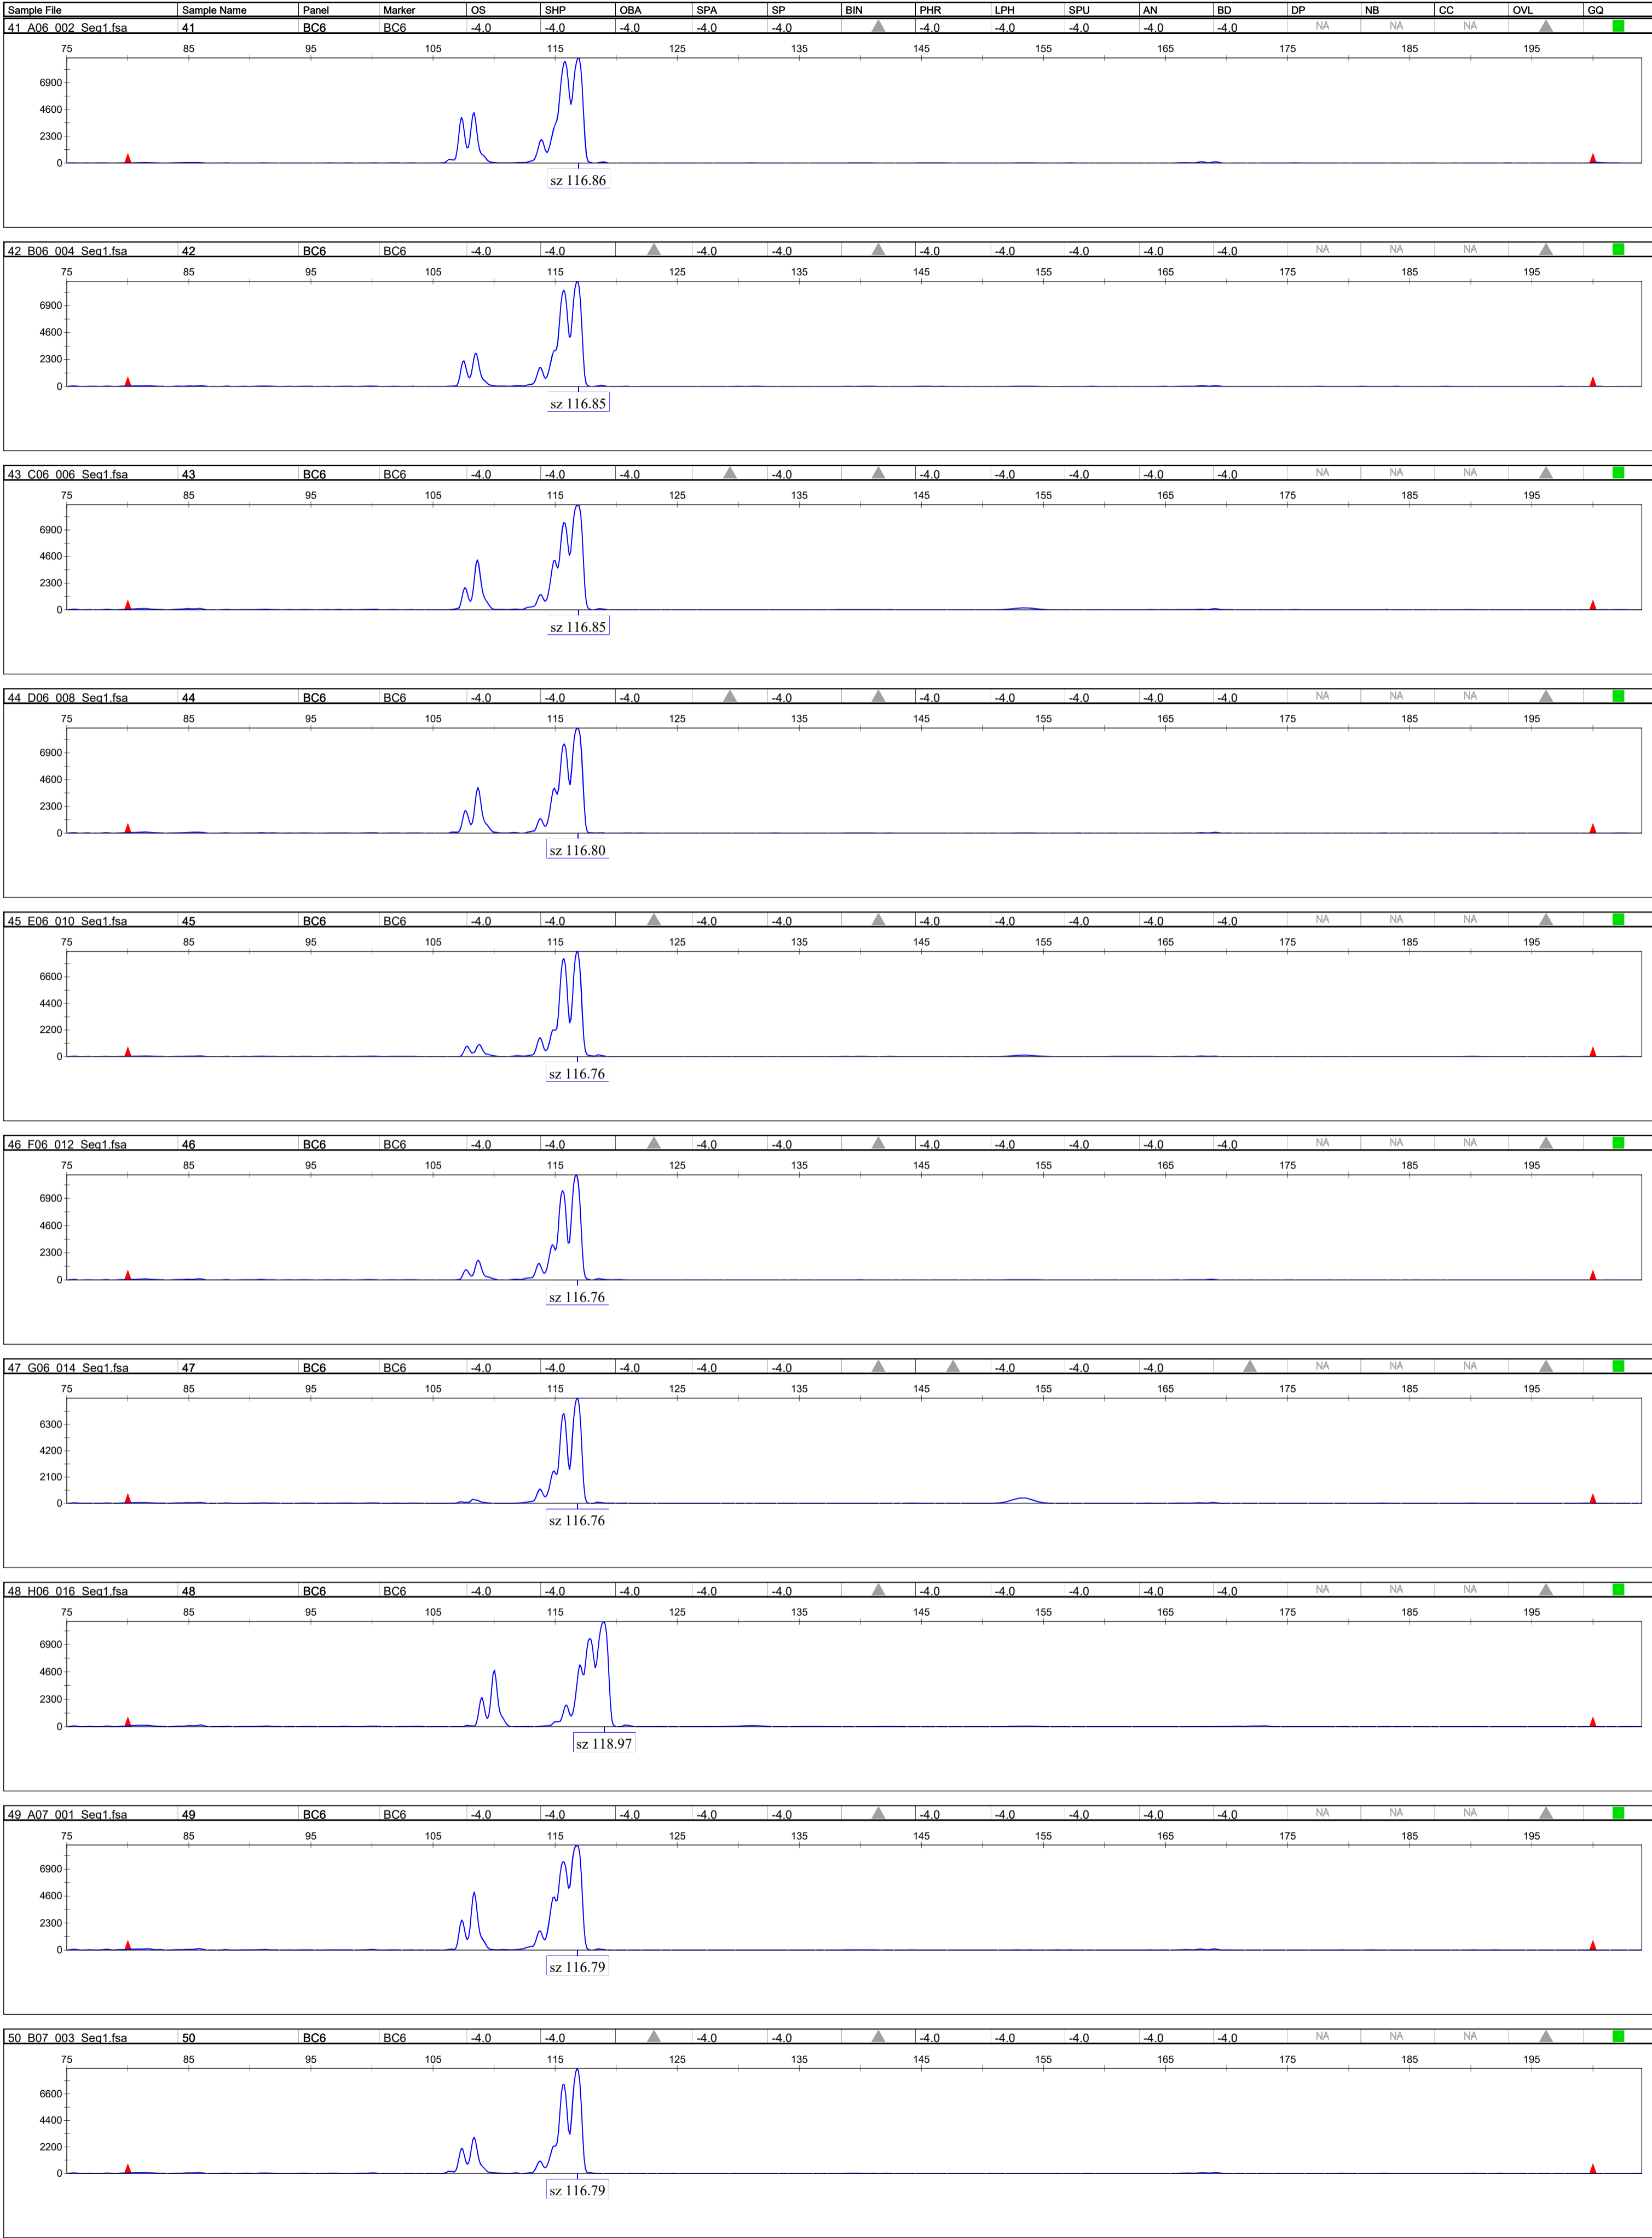

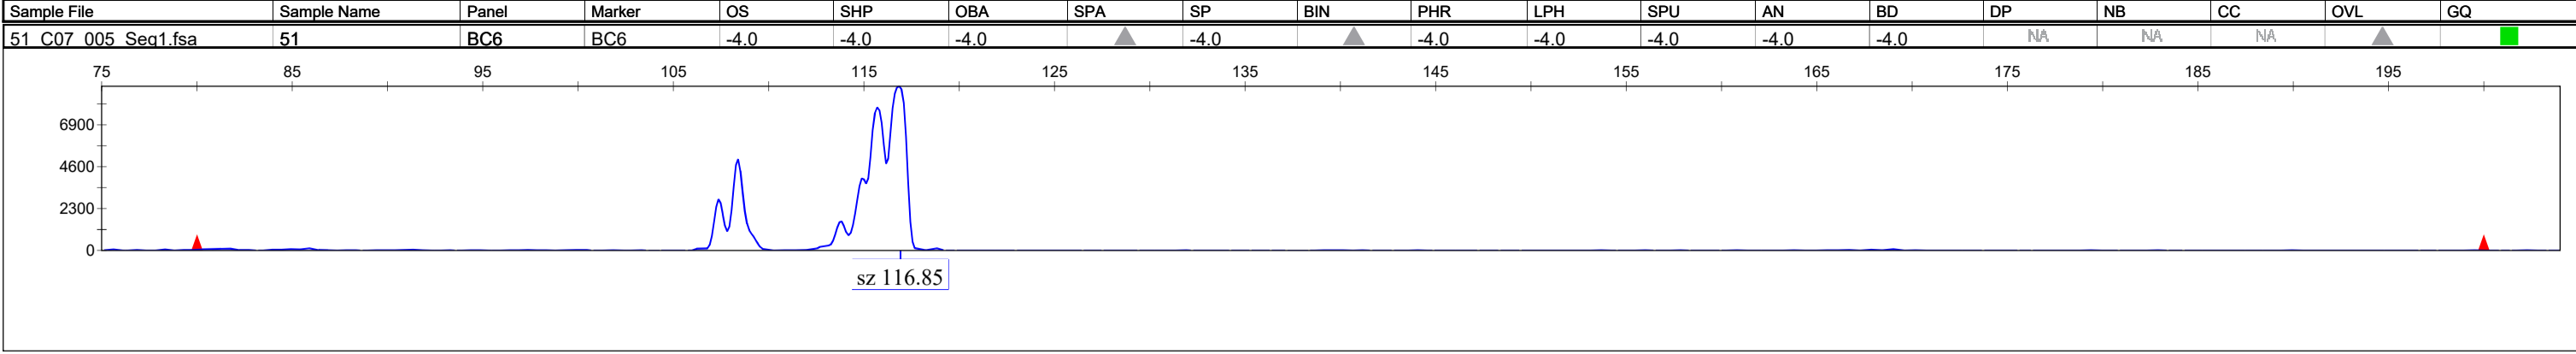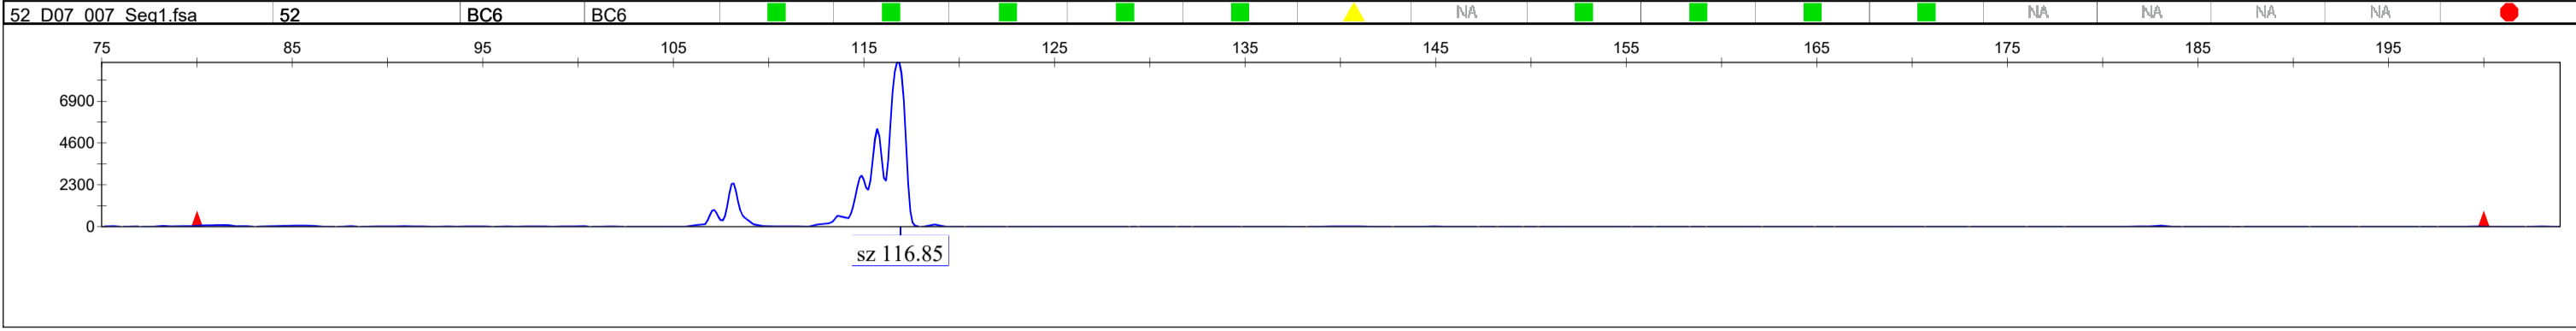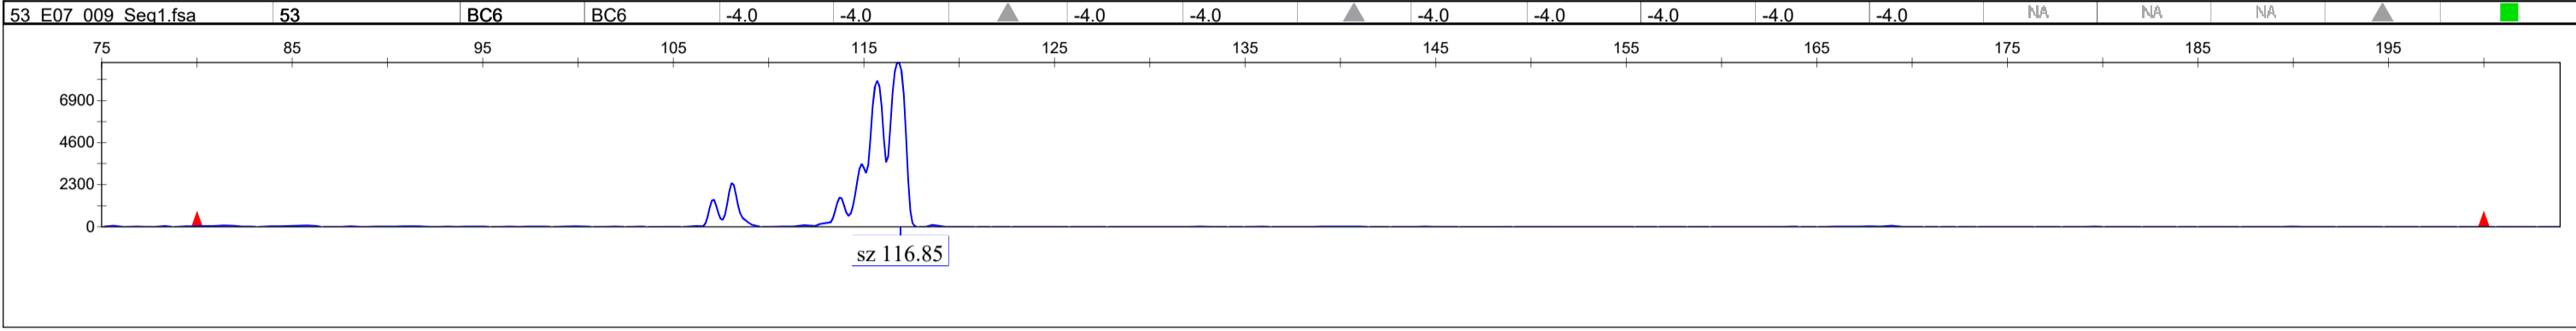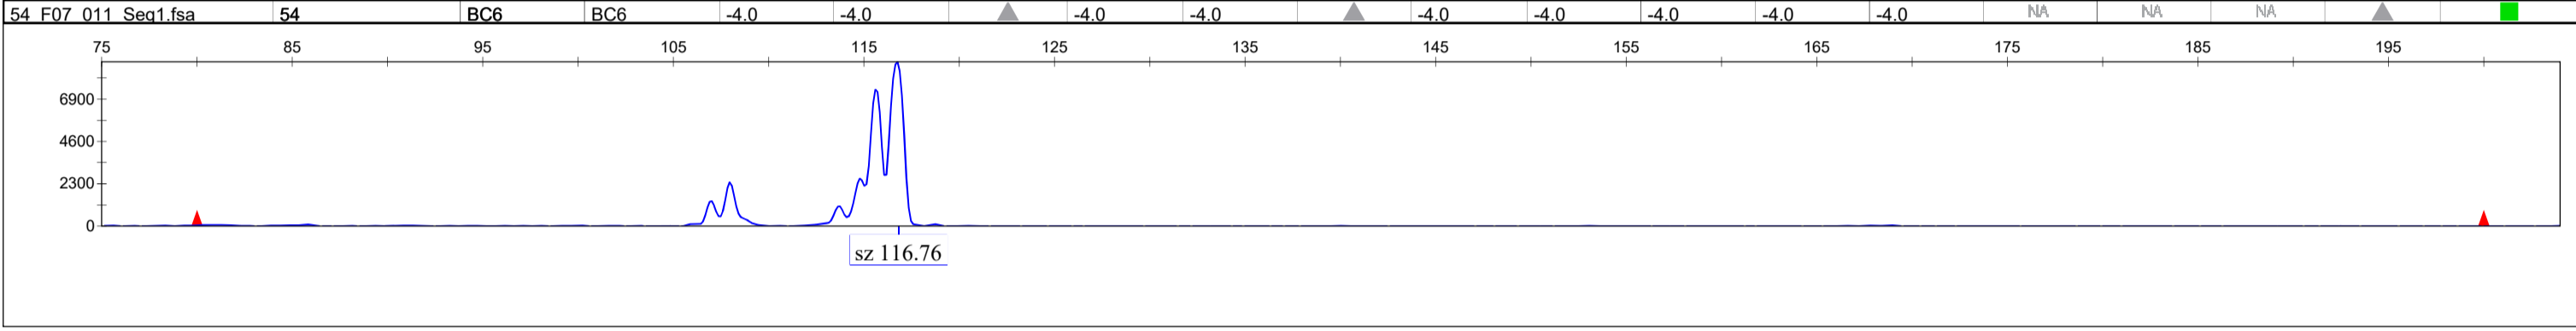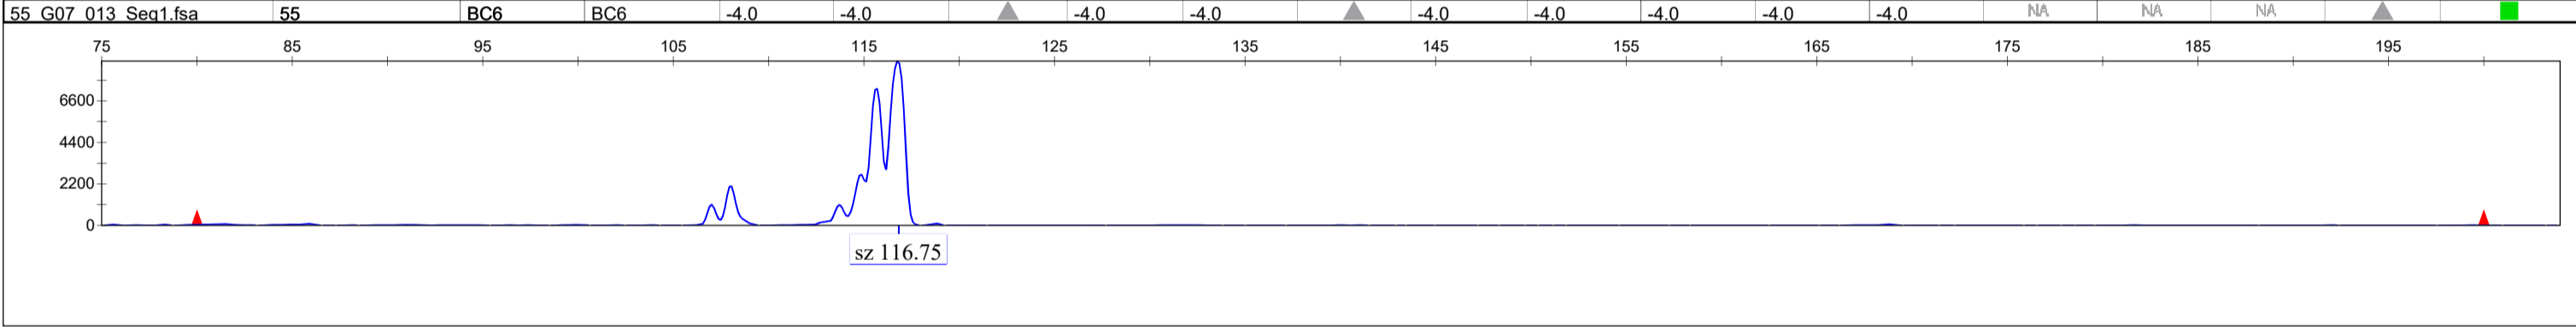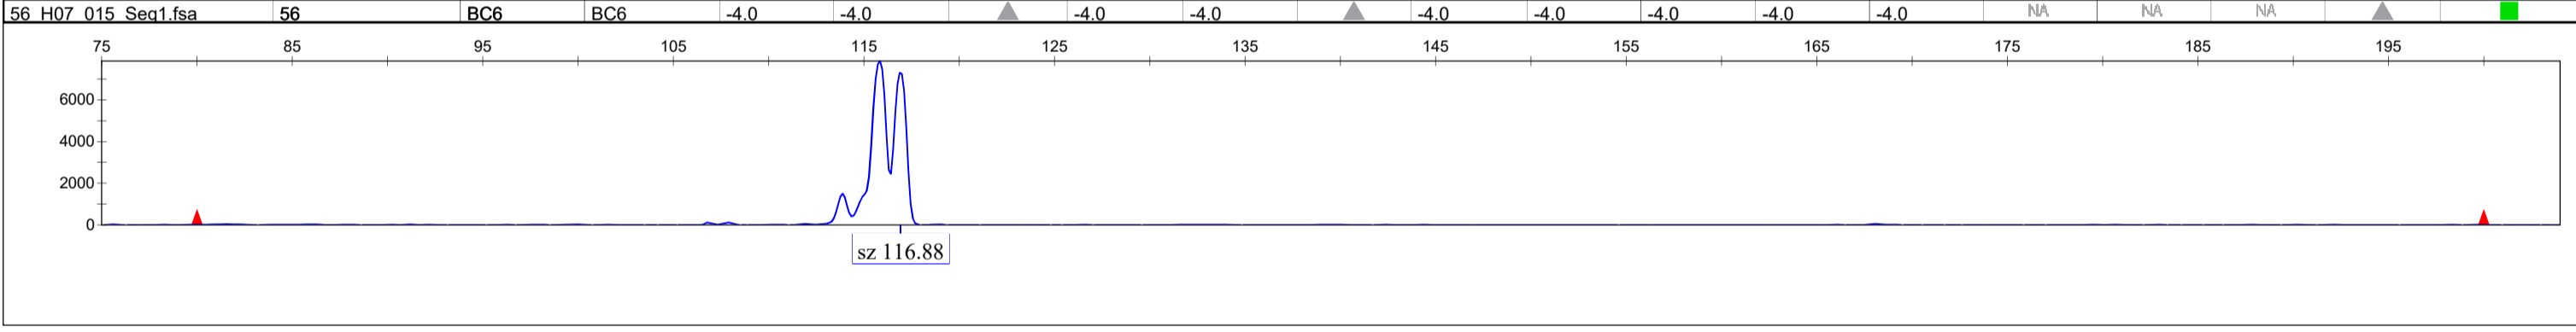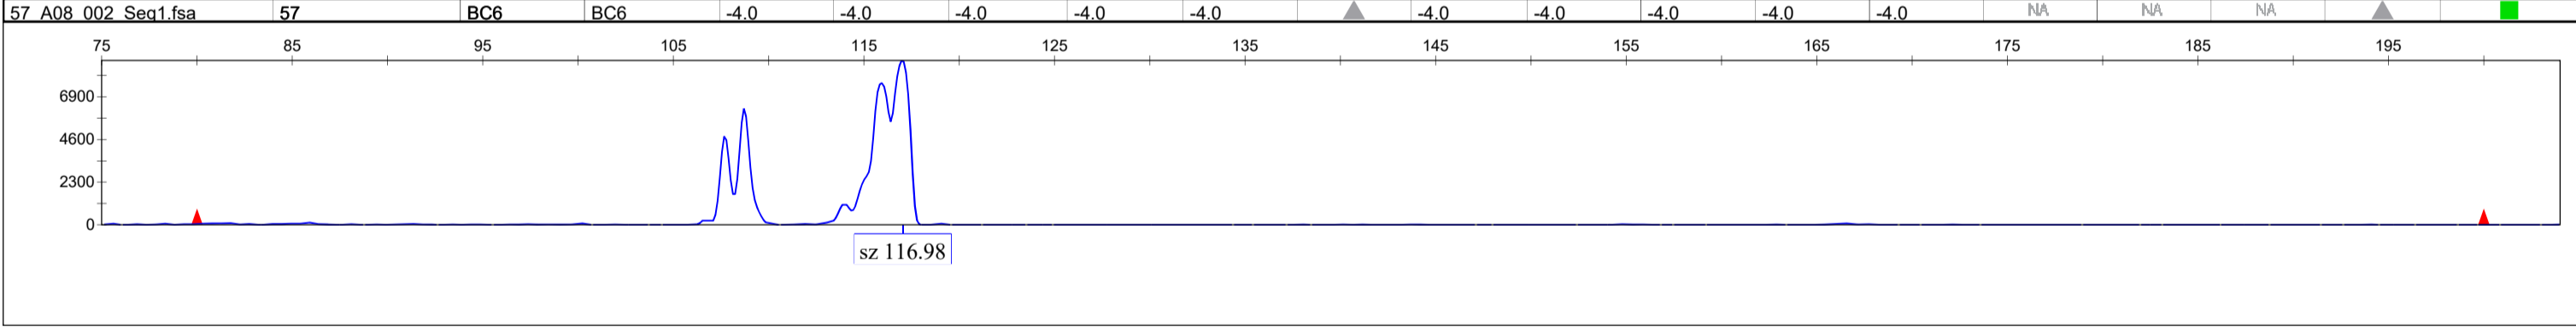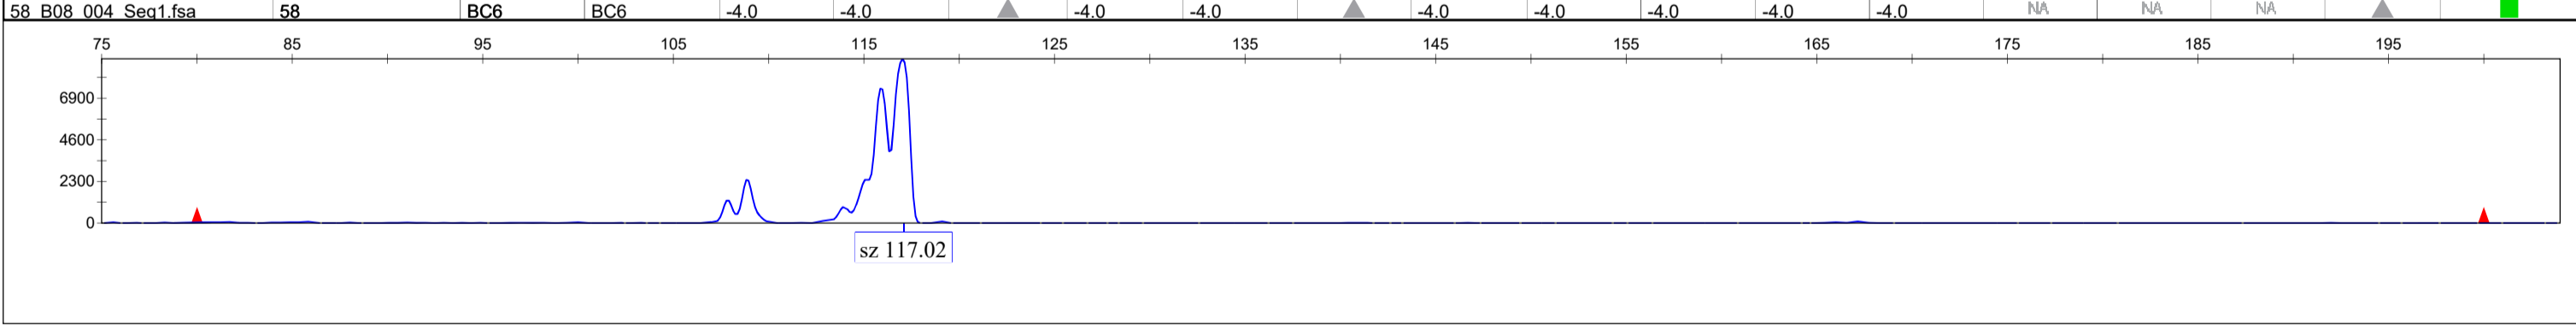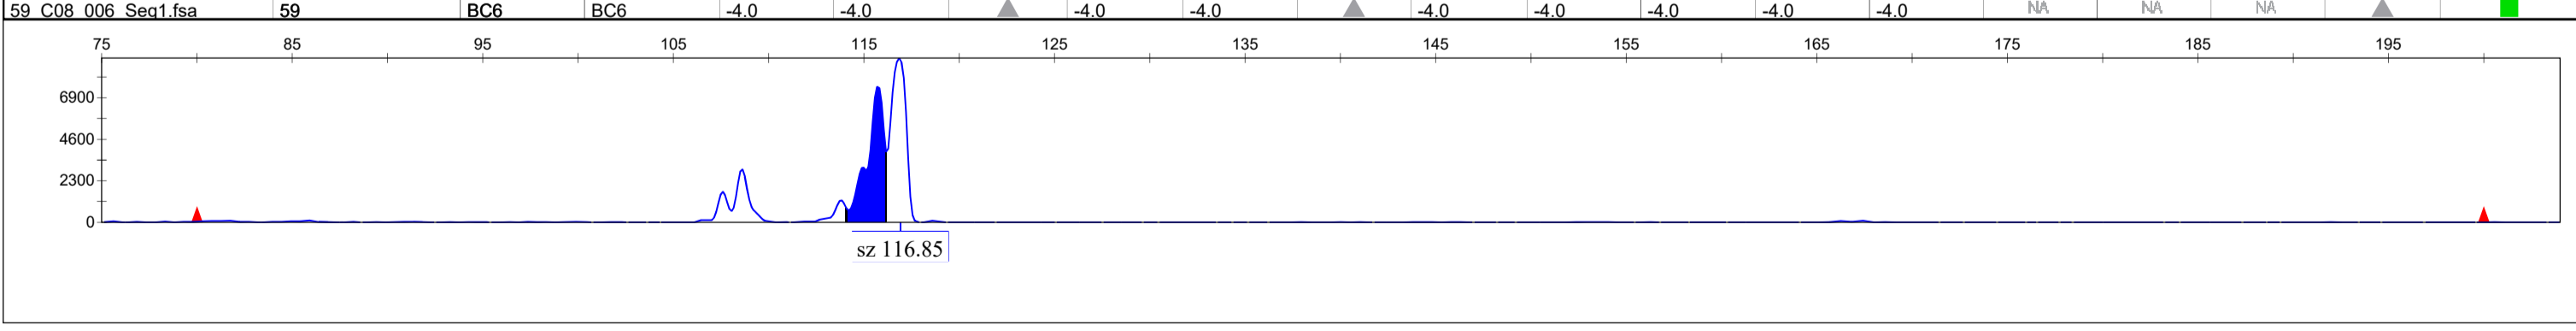

Supplement: s1 [file s1 › BC6.pdf]

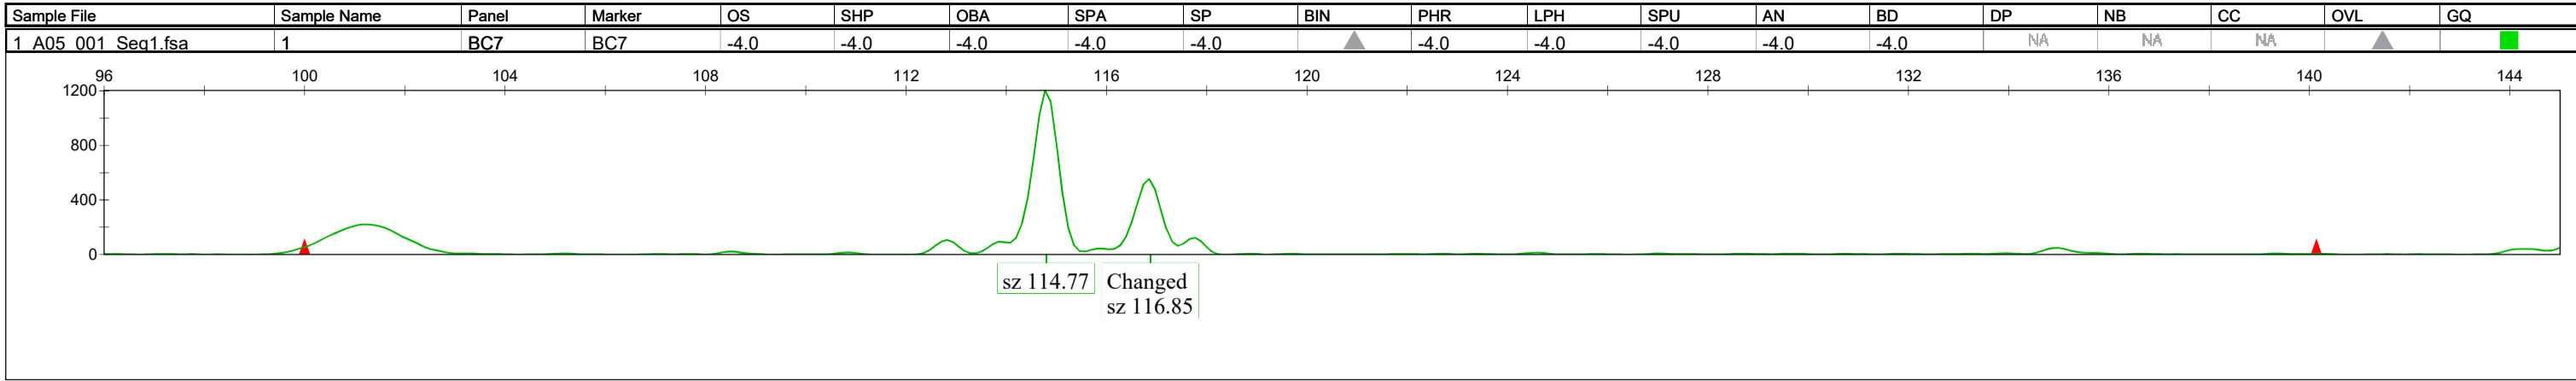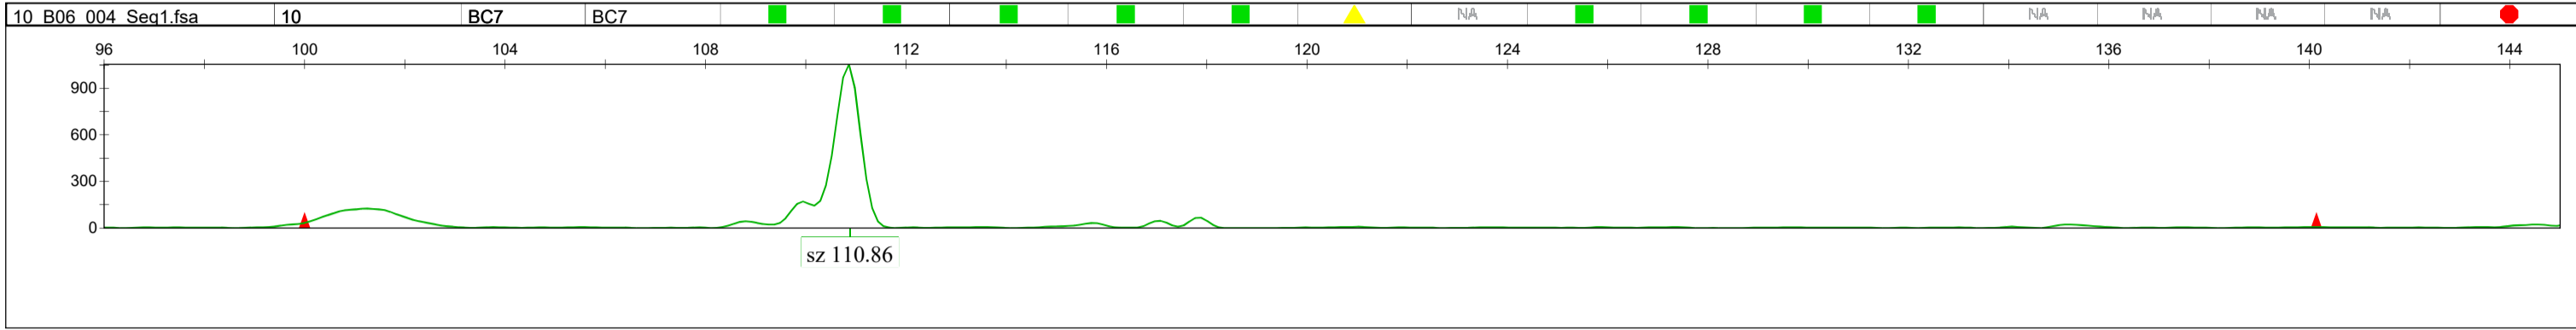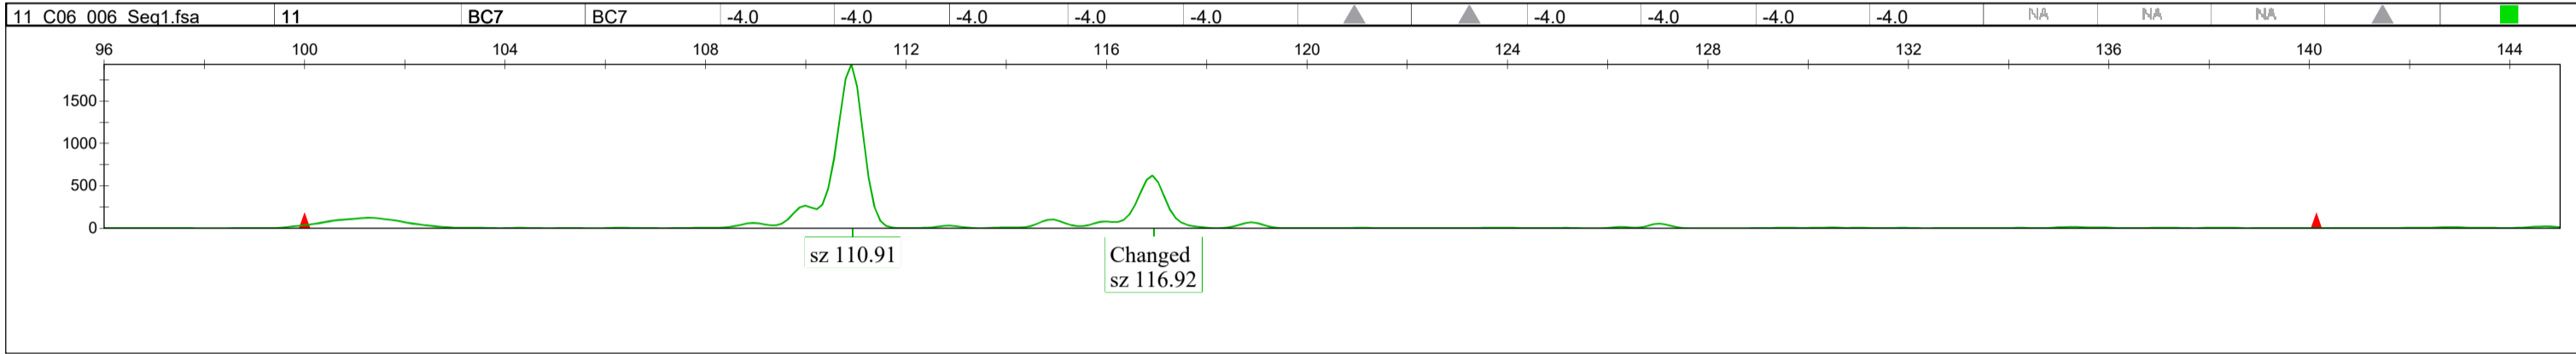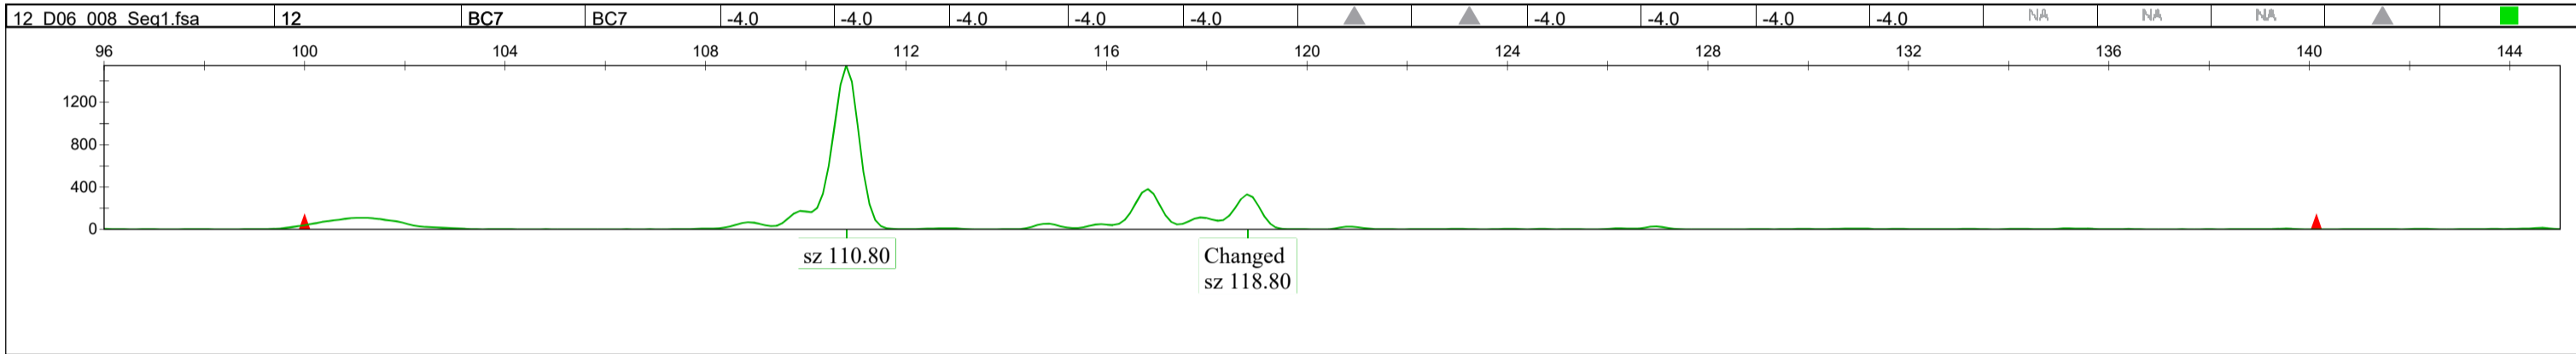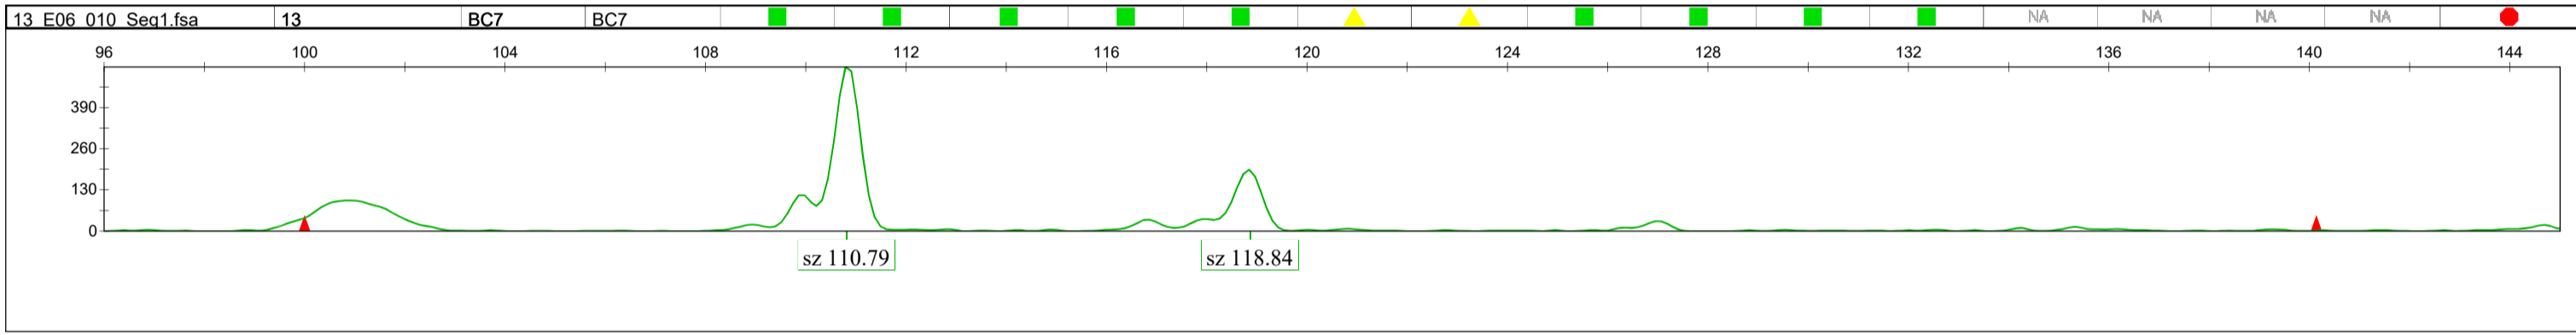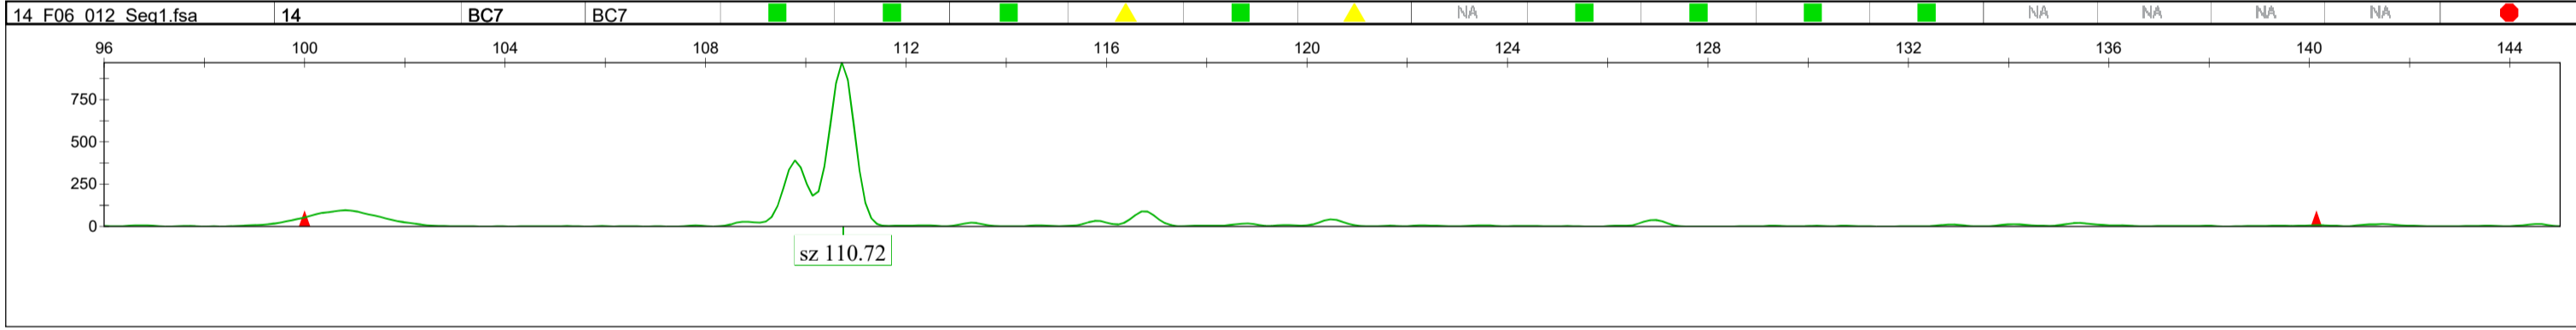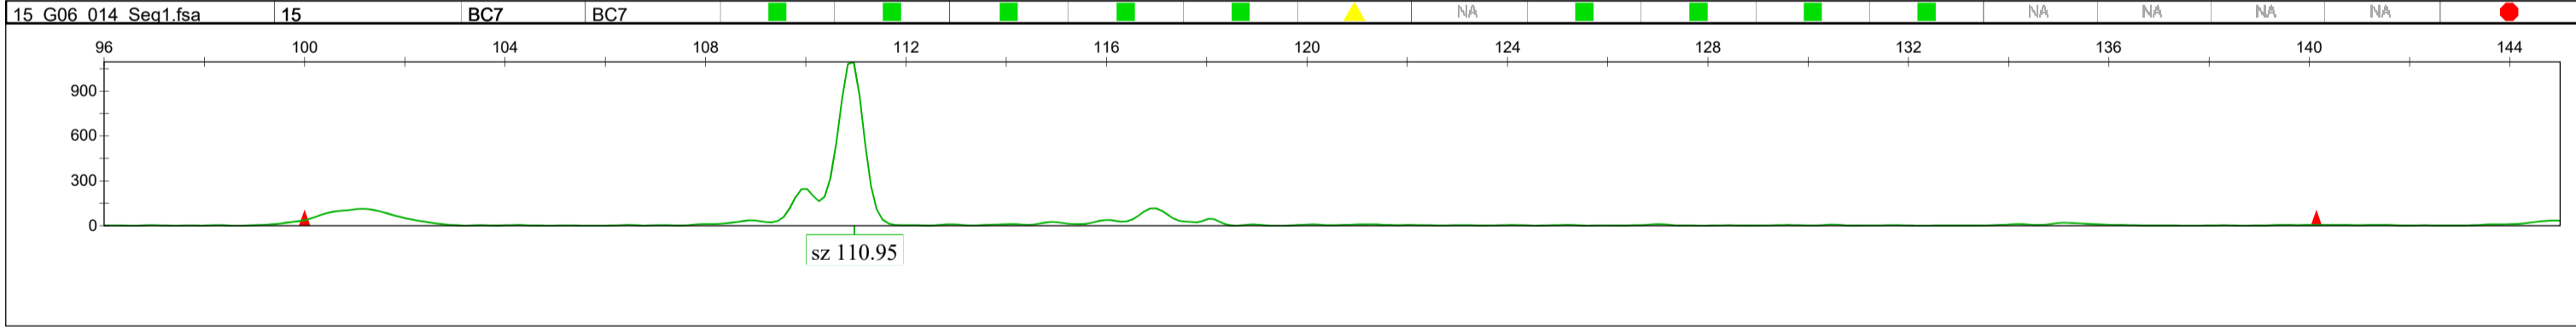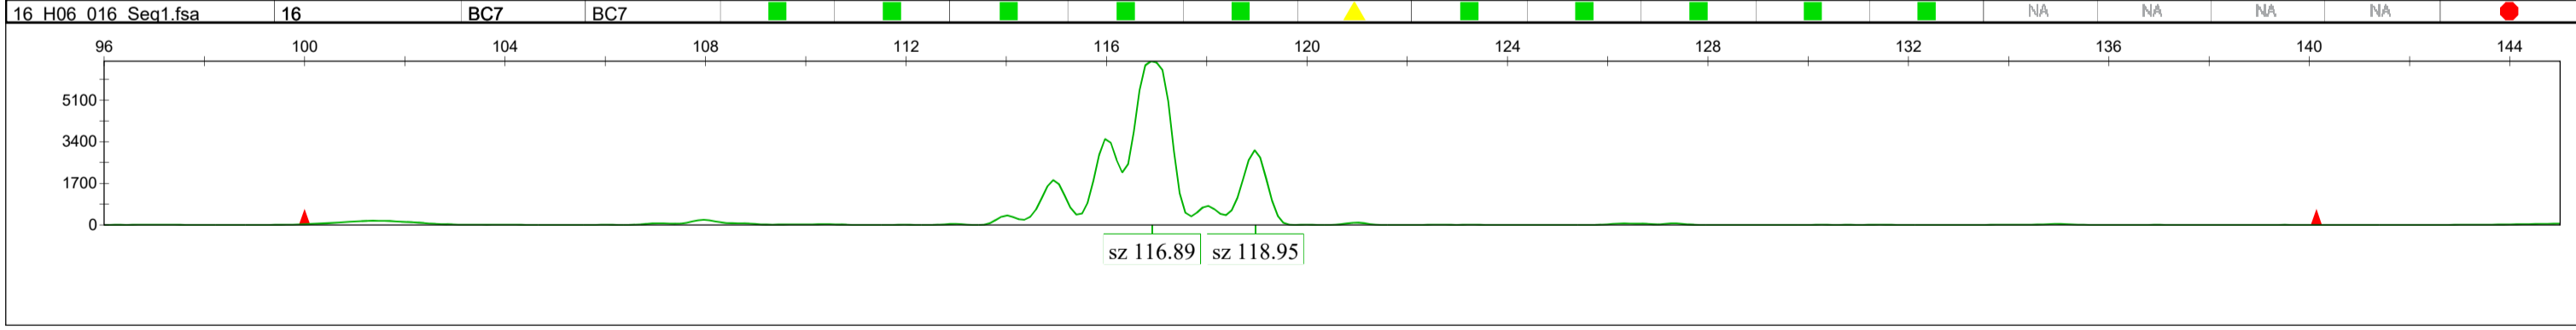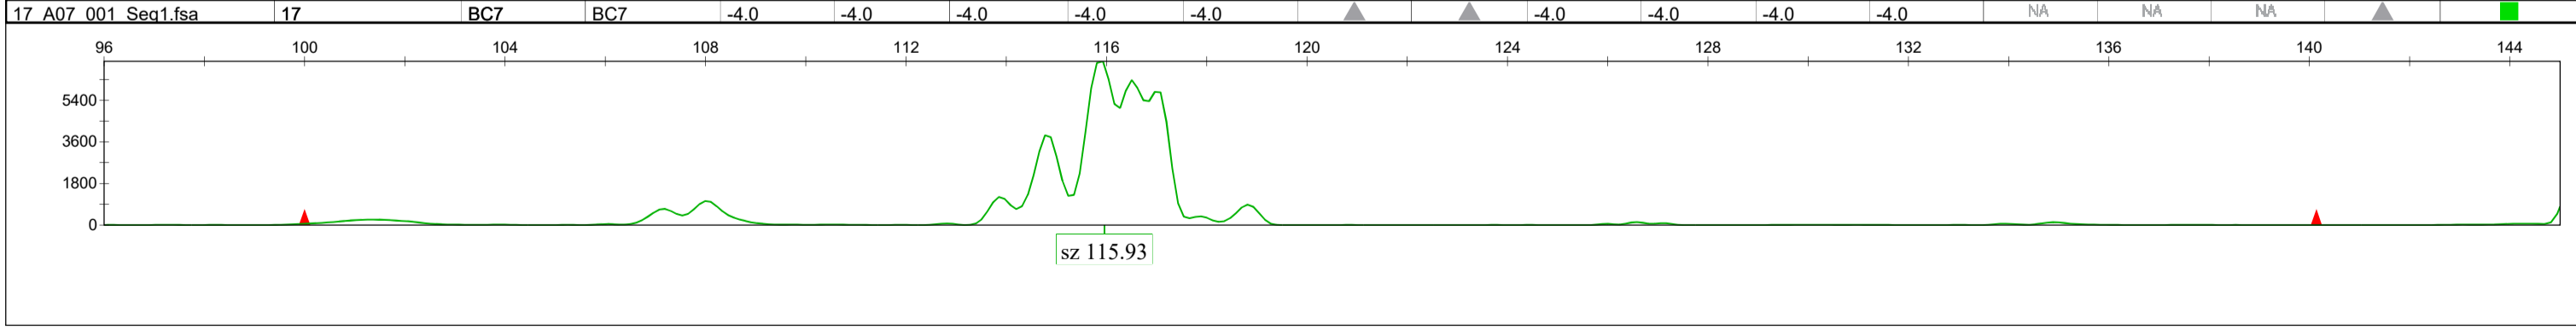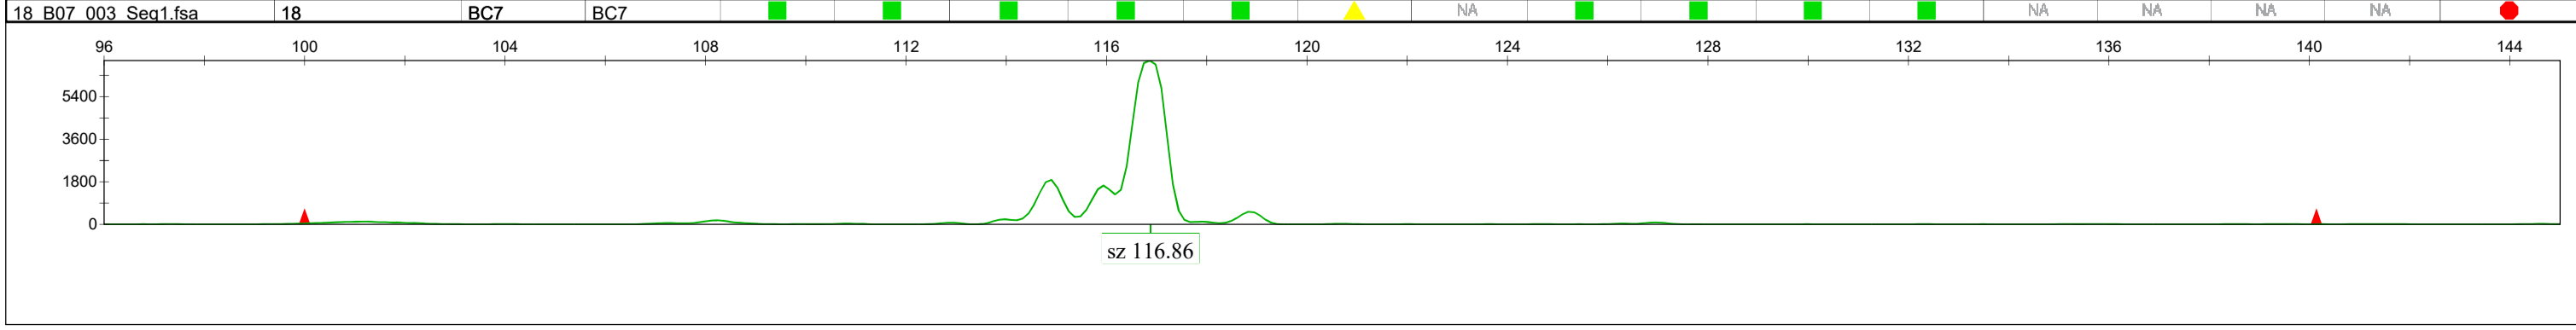

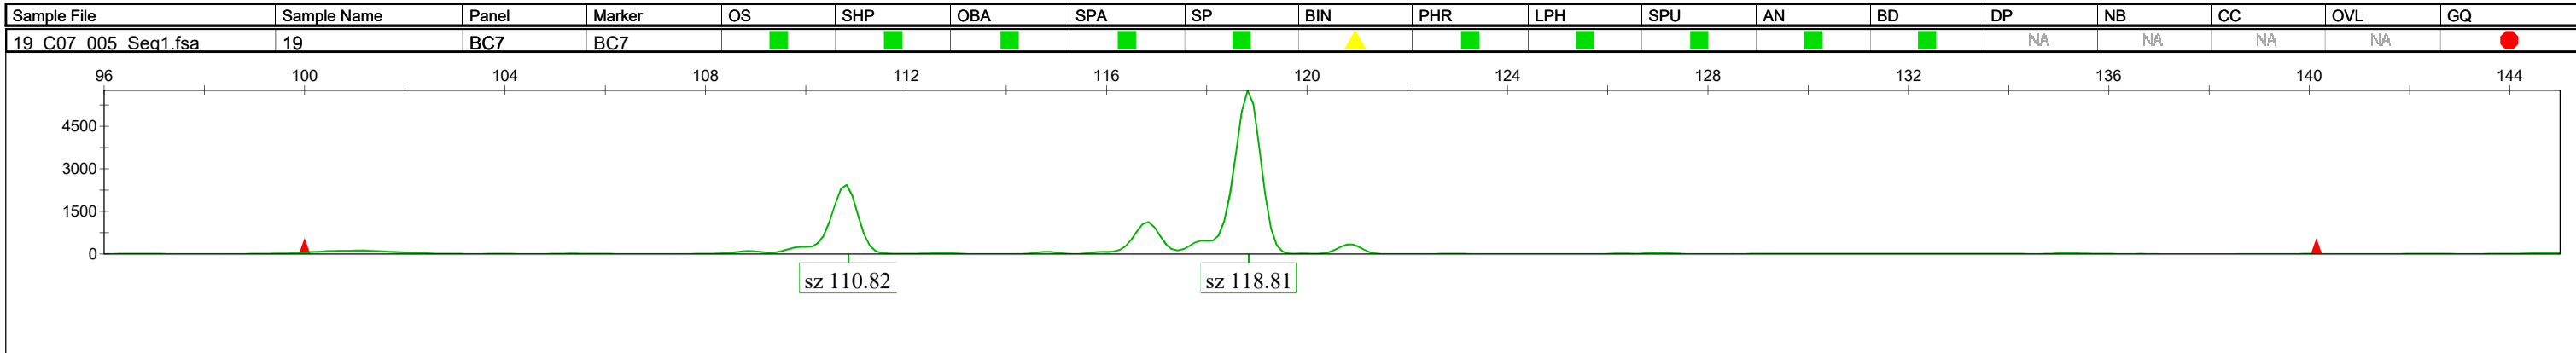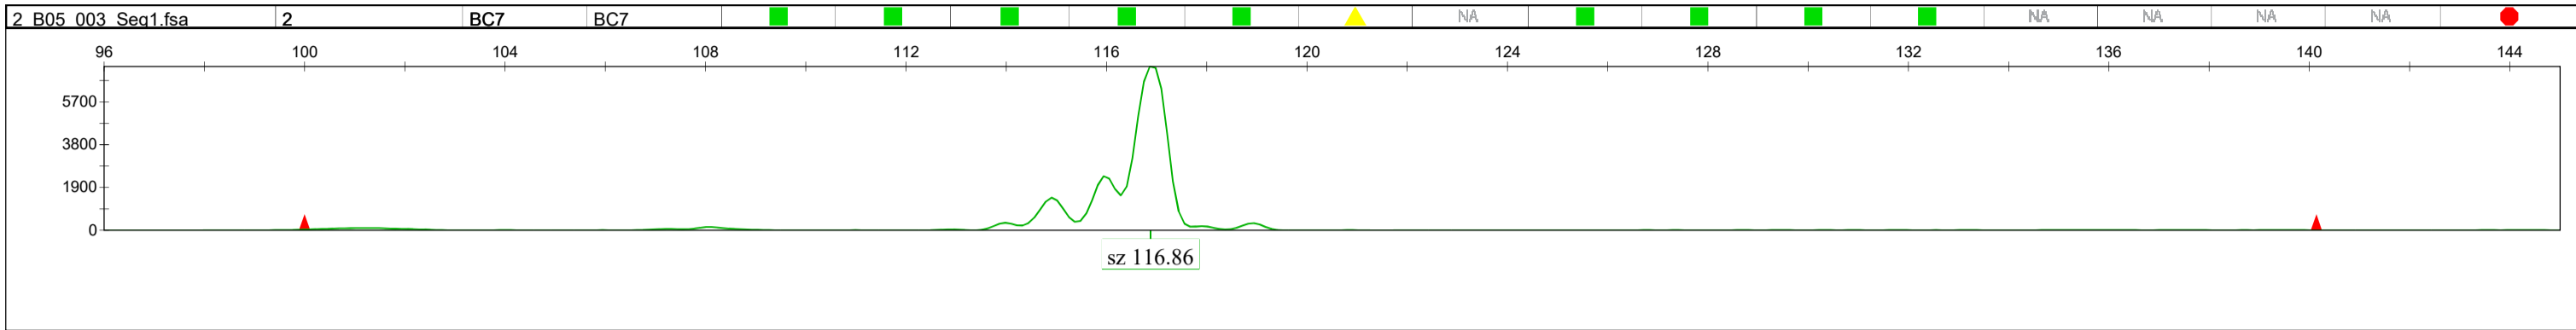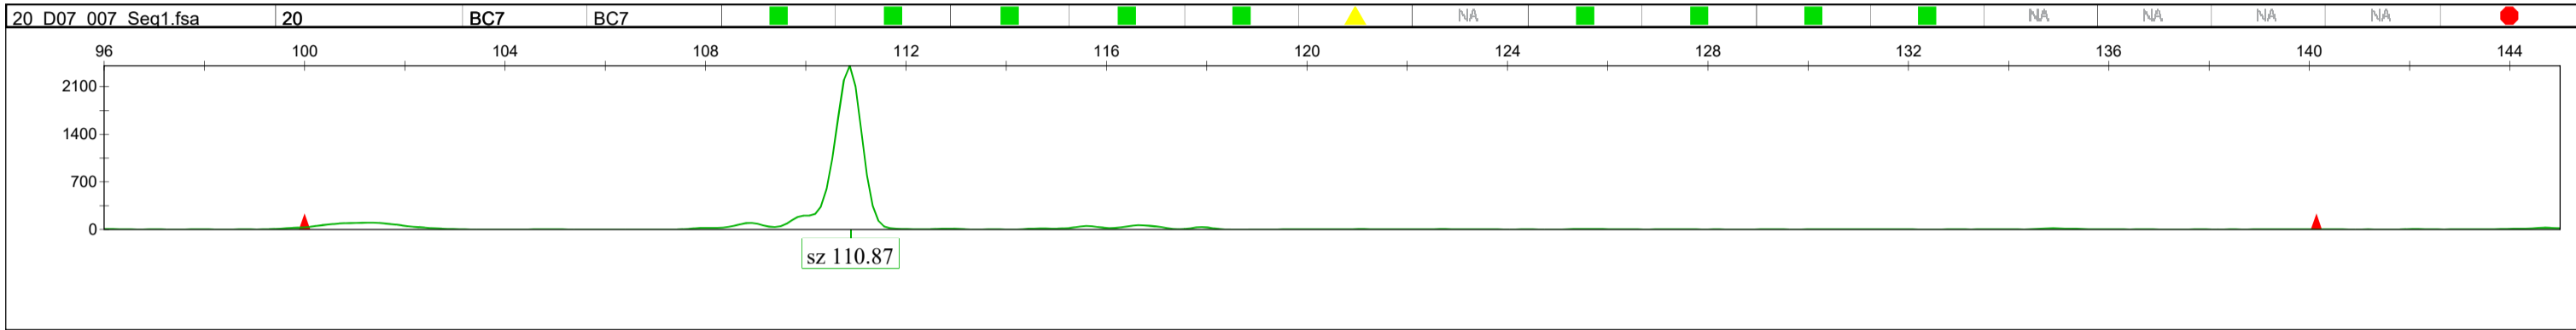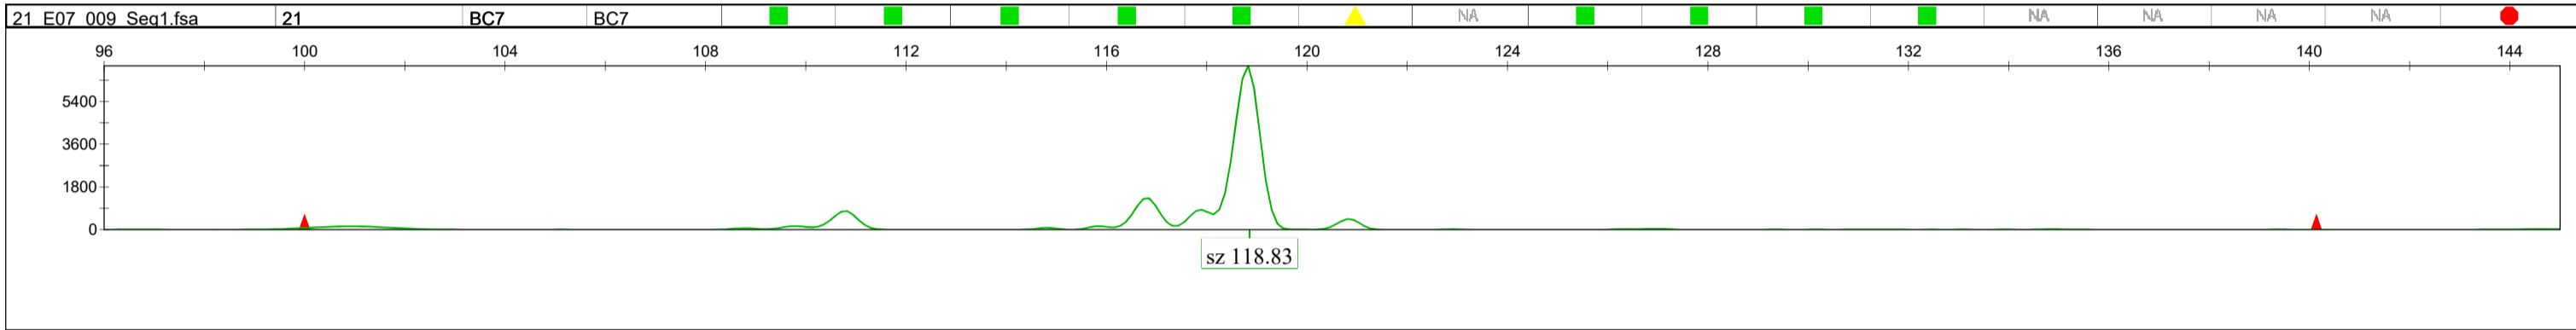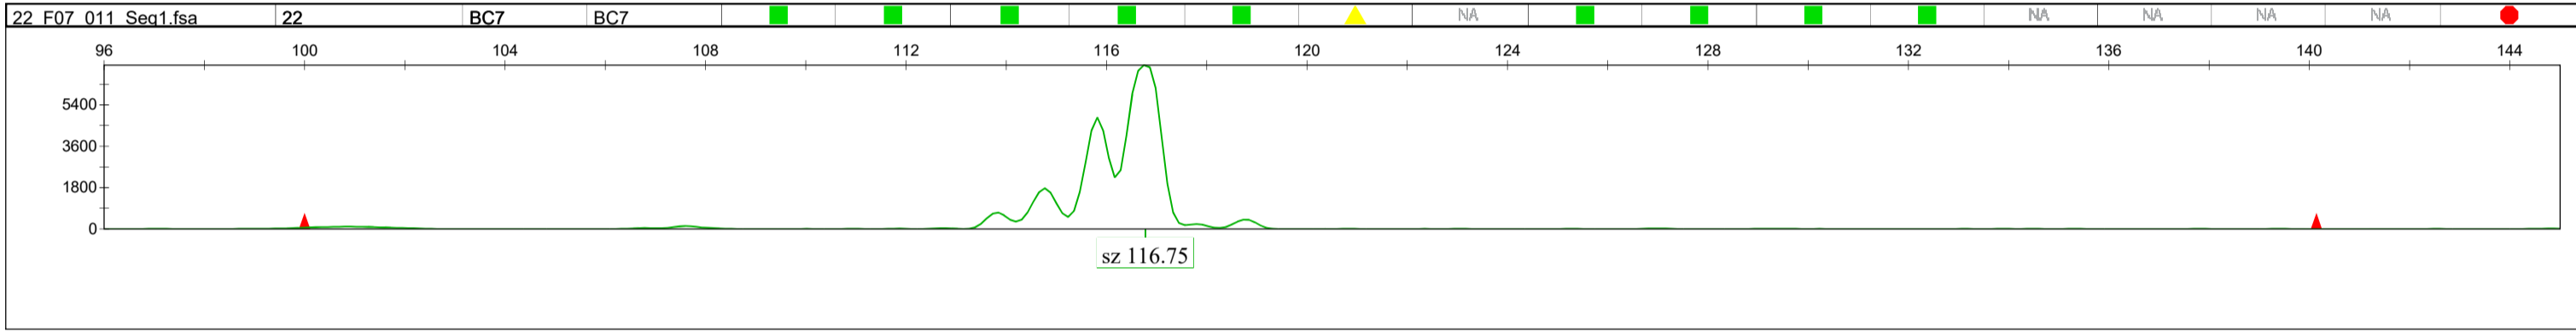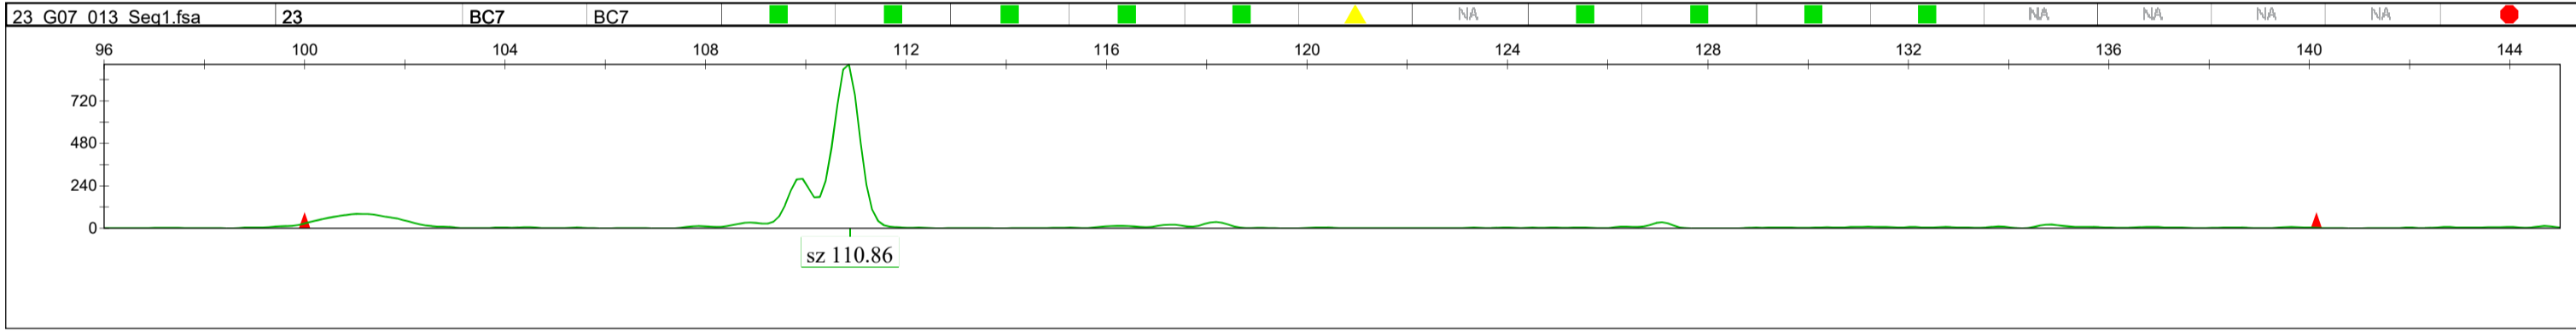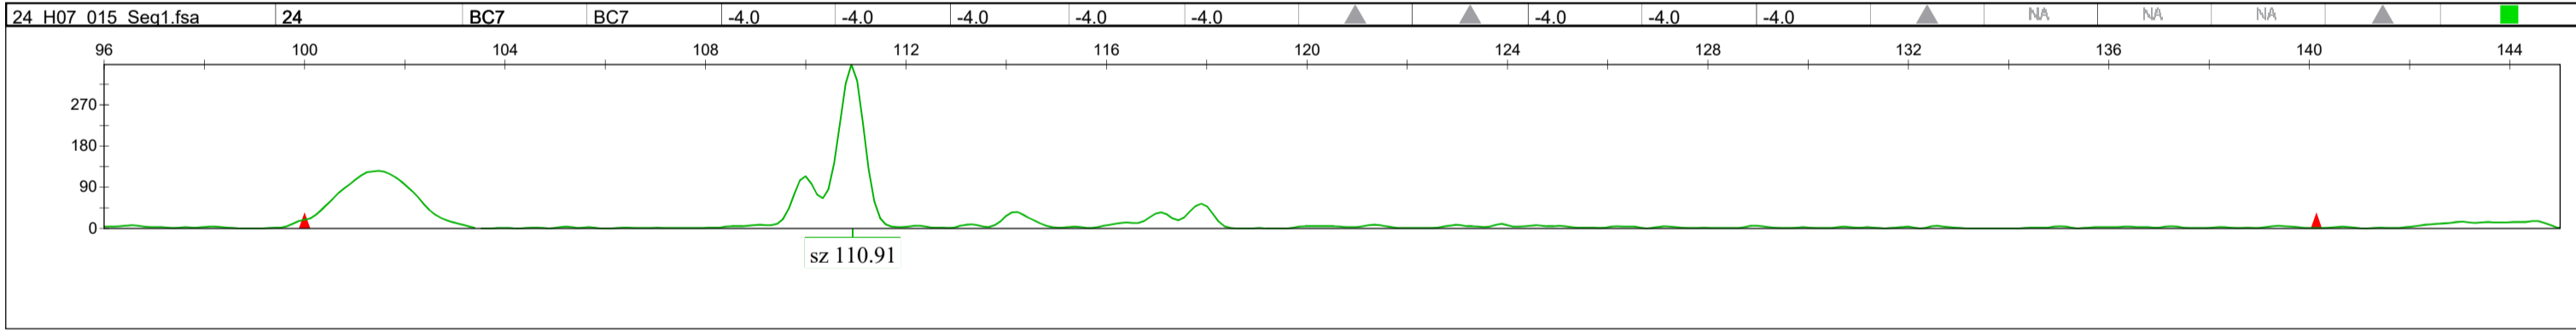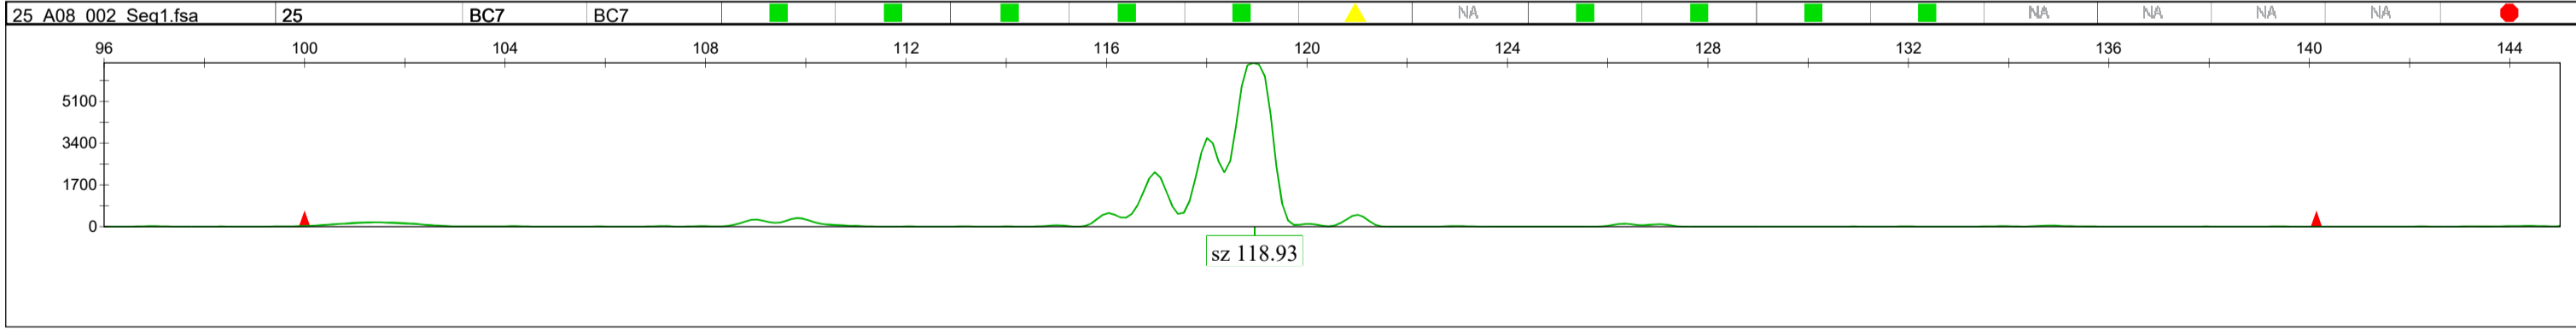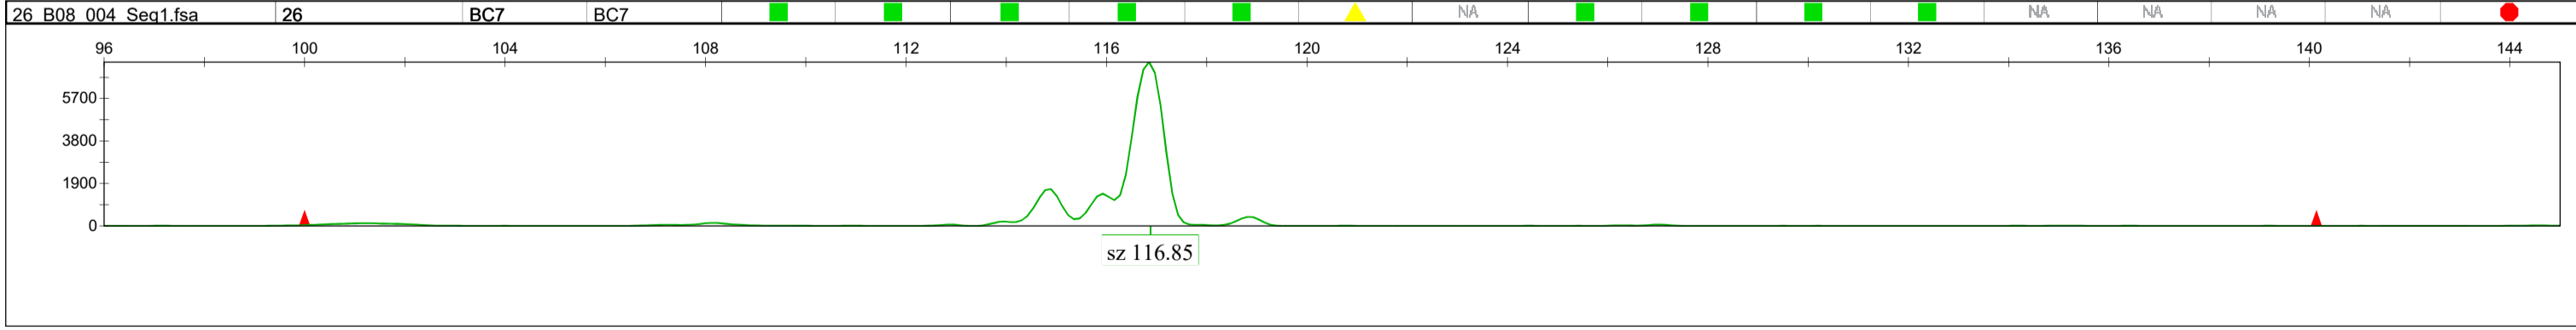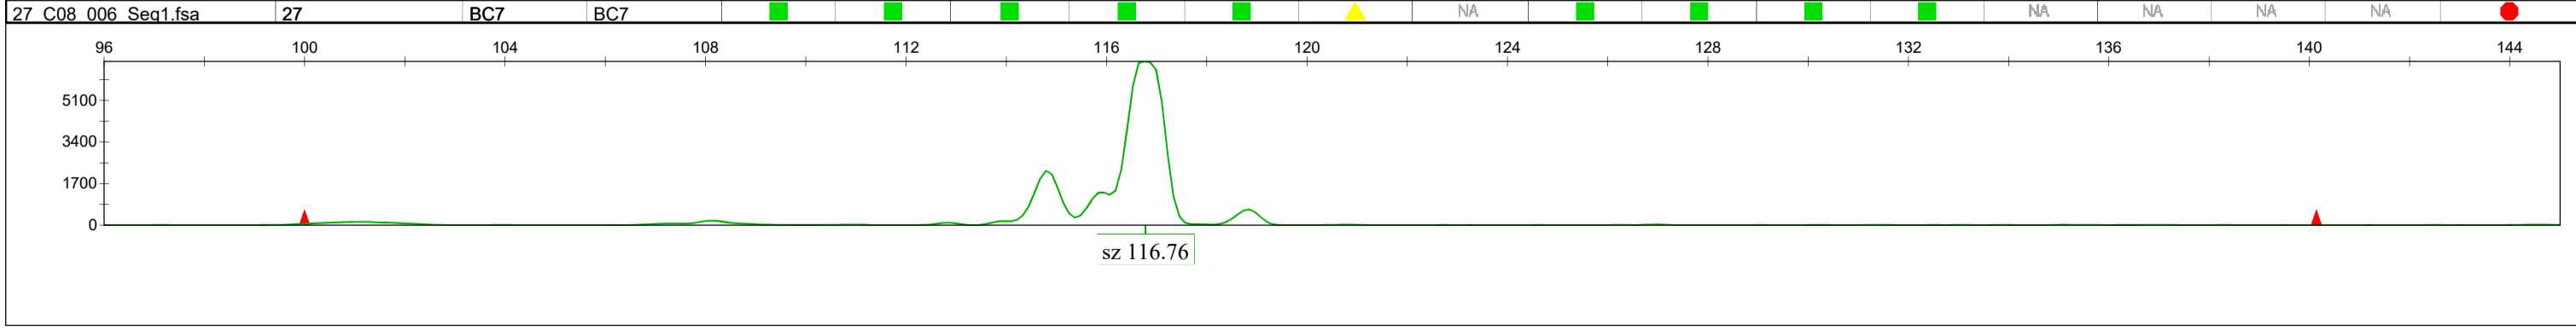

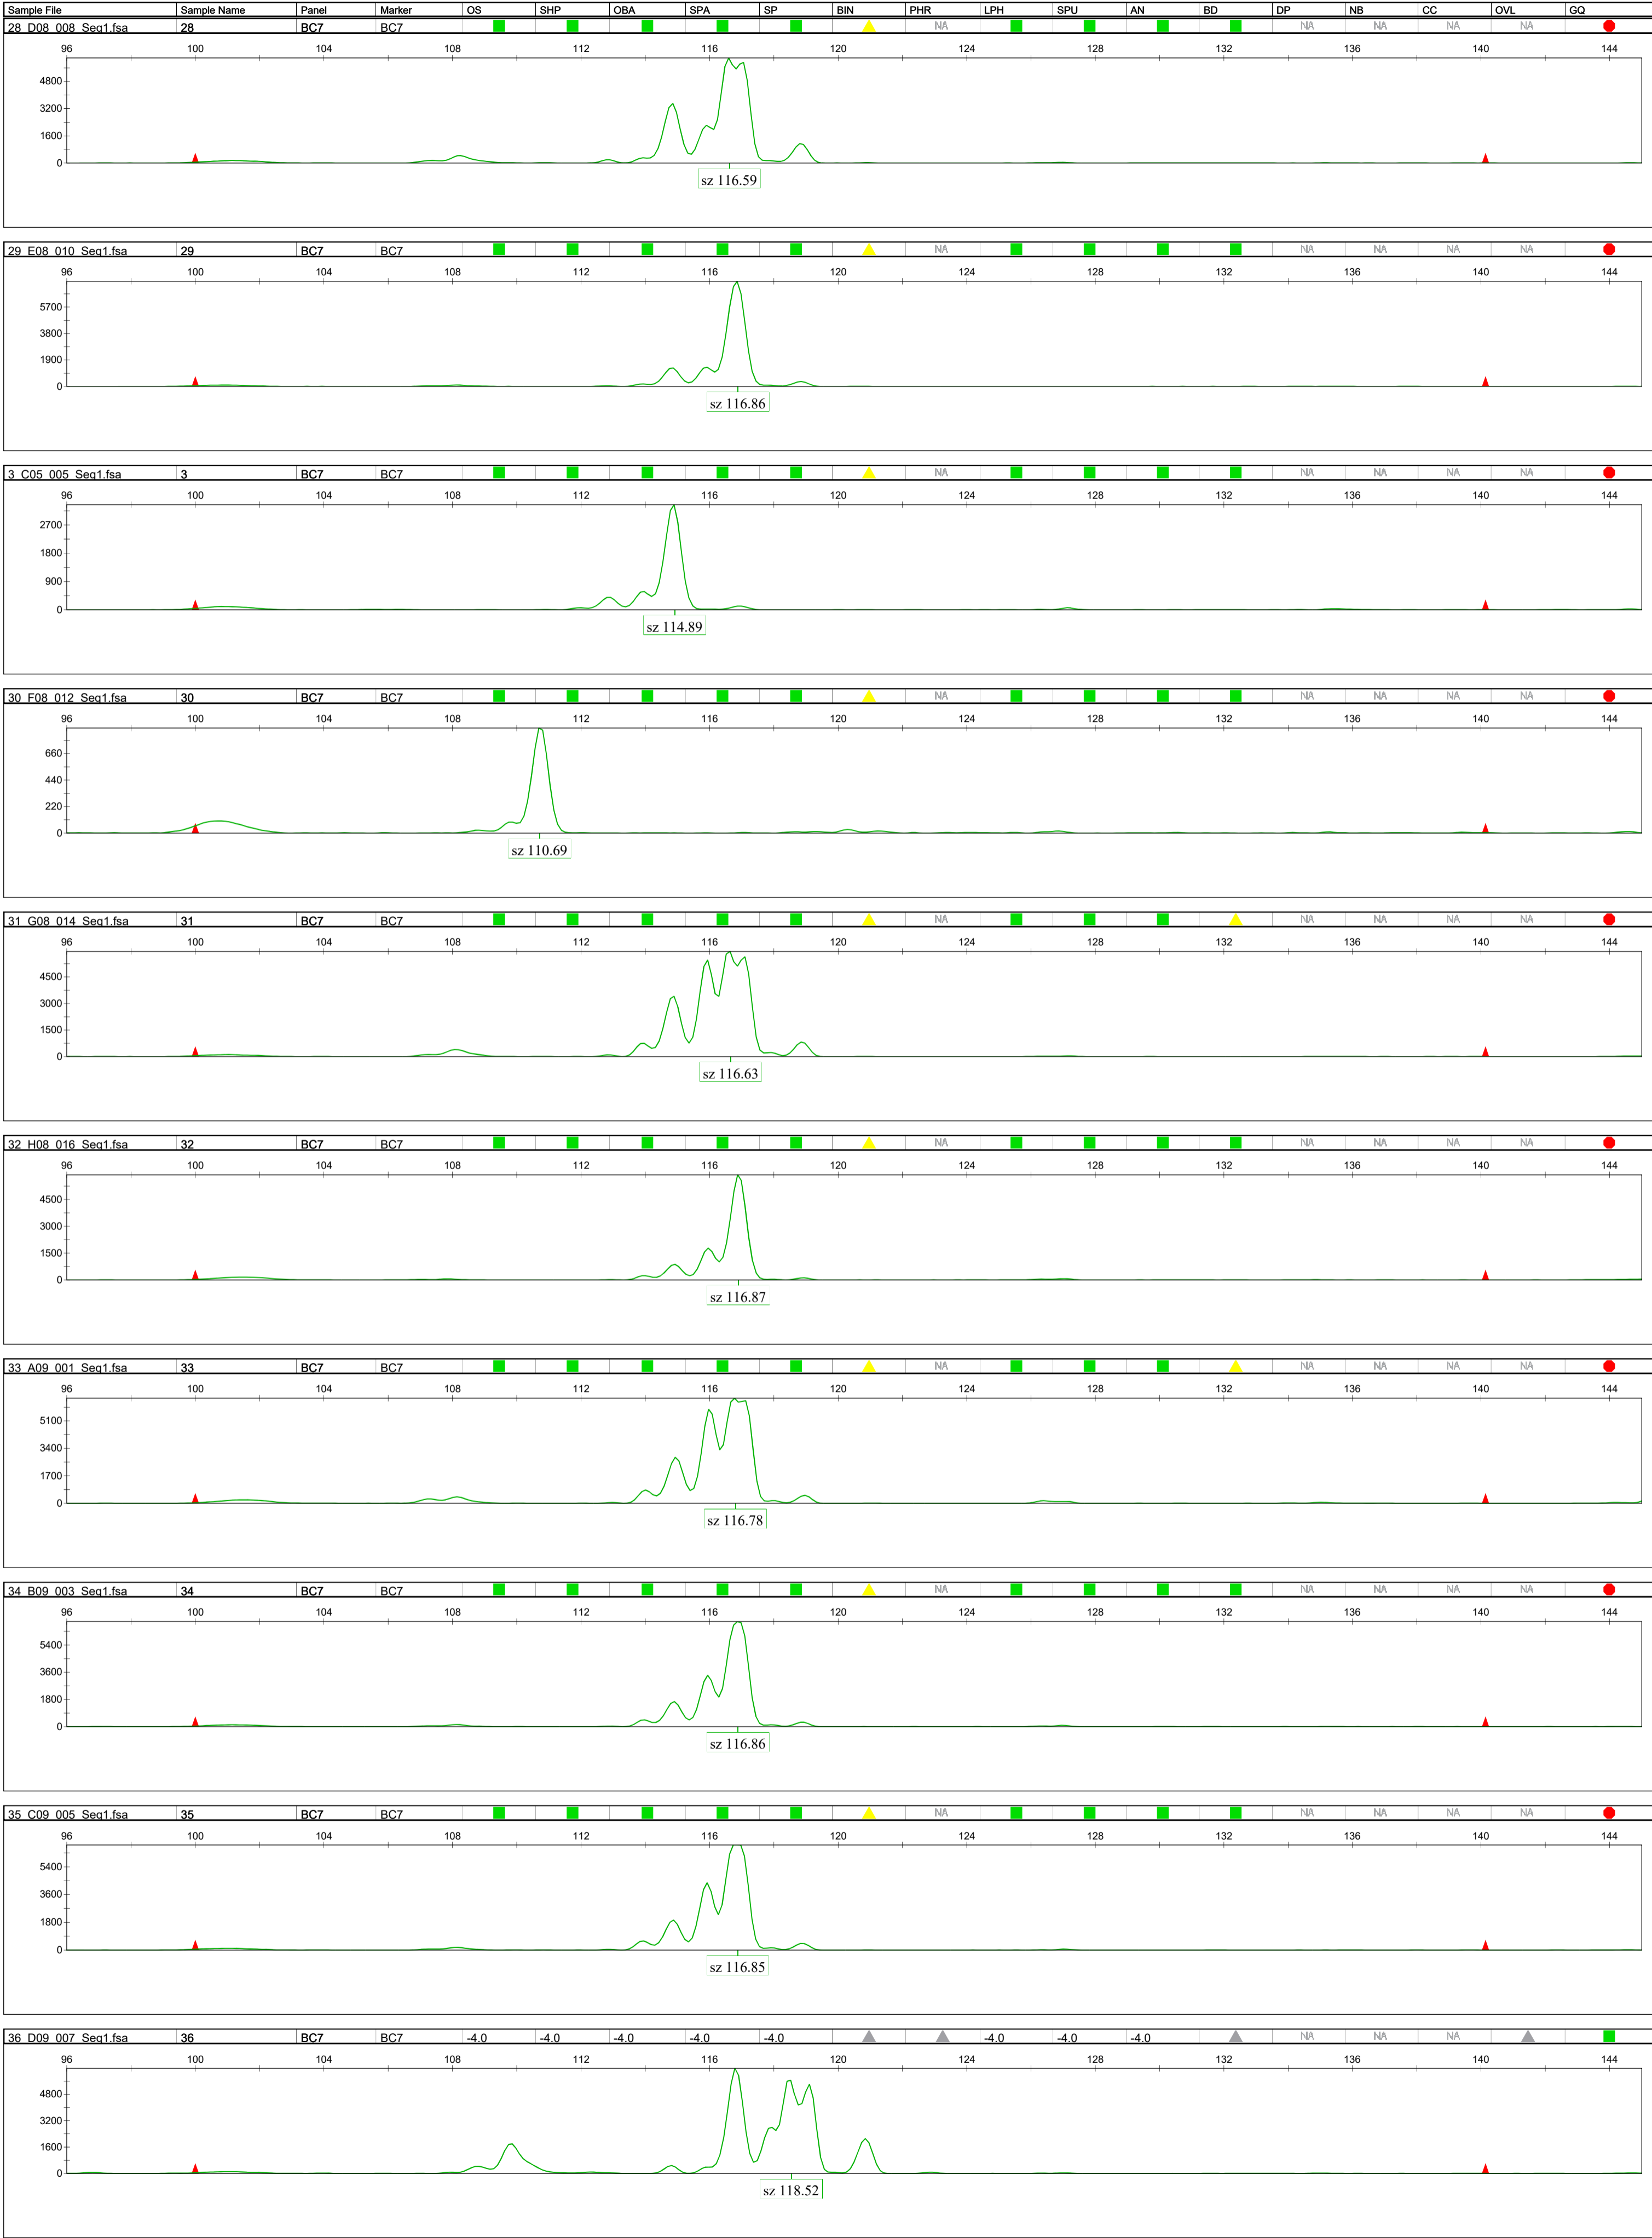

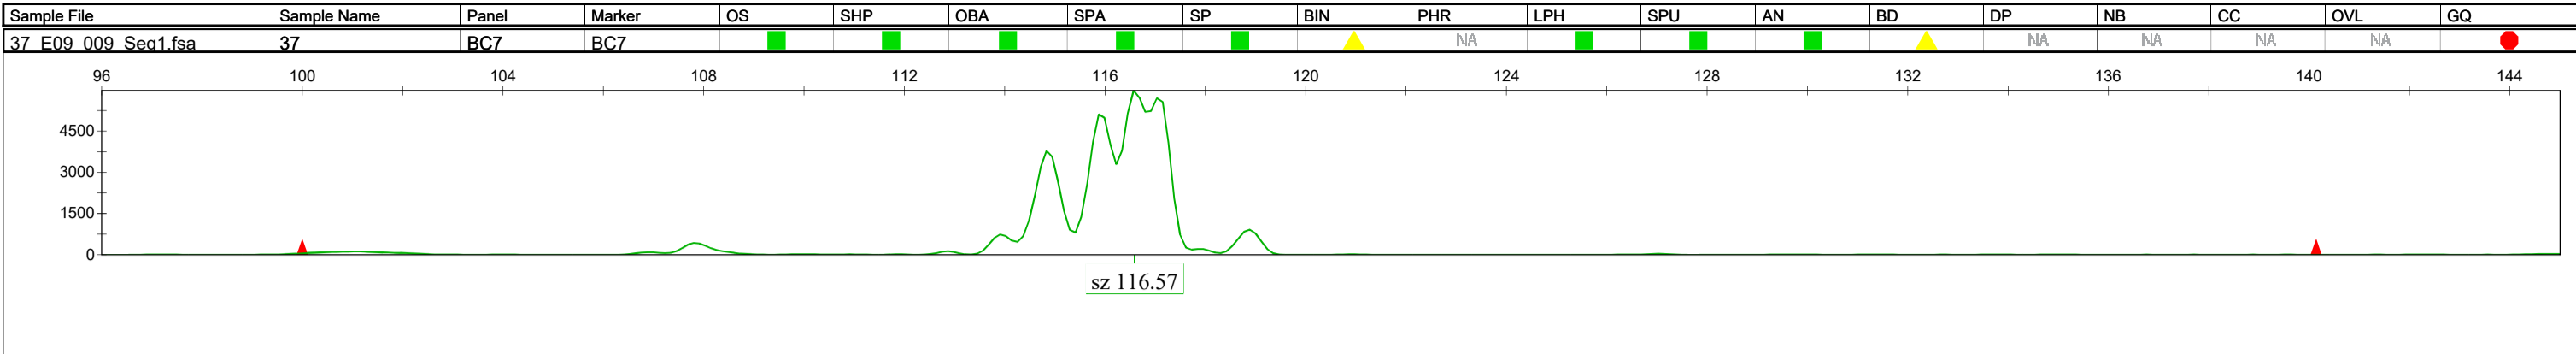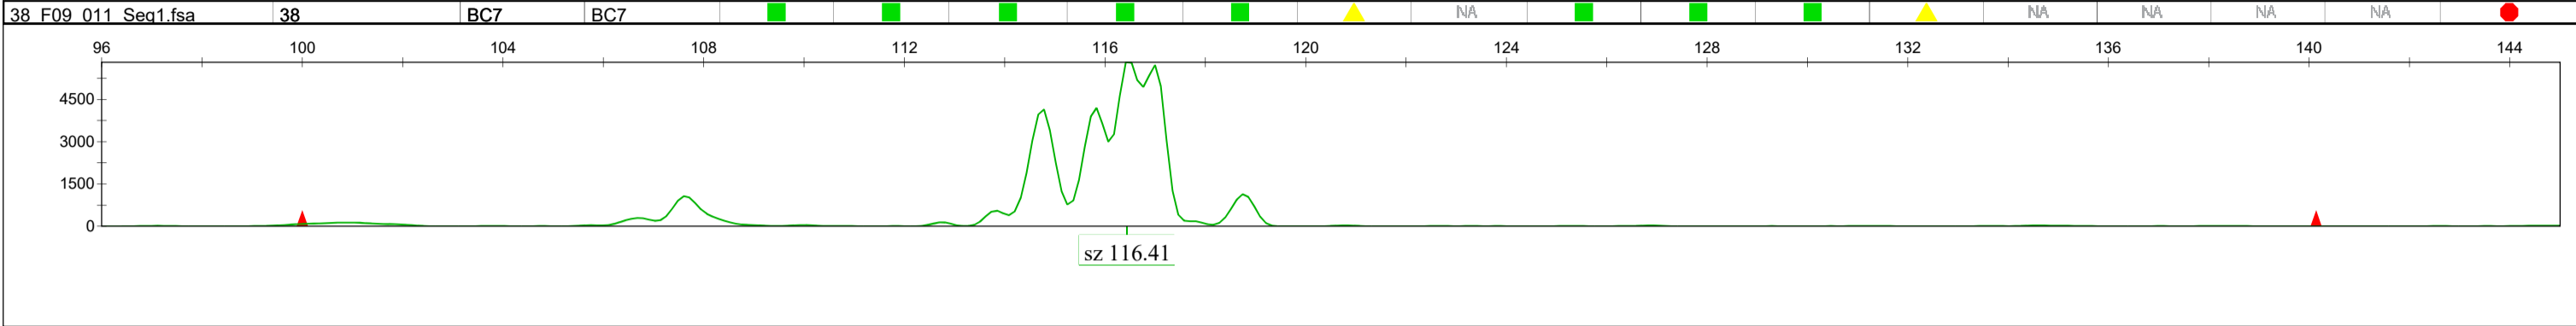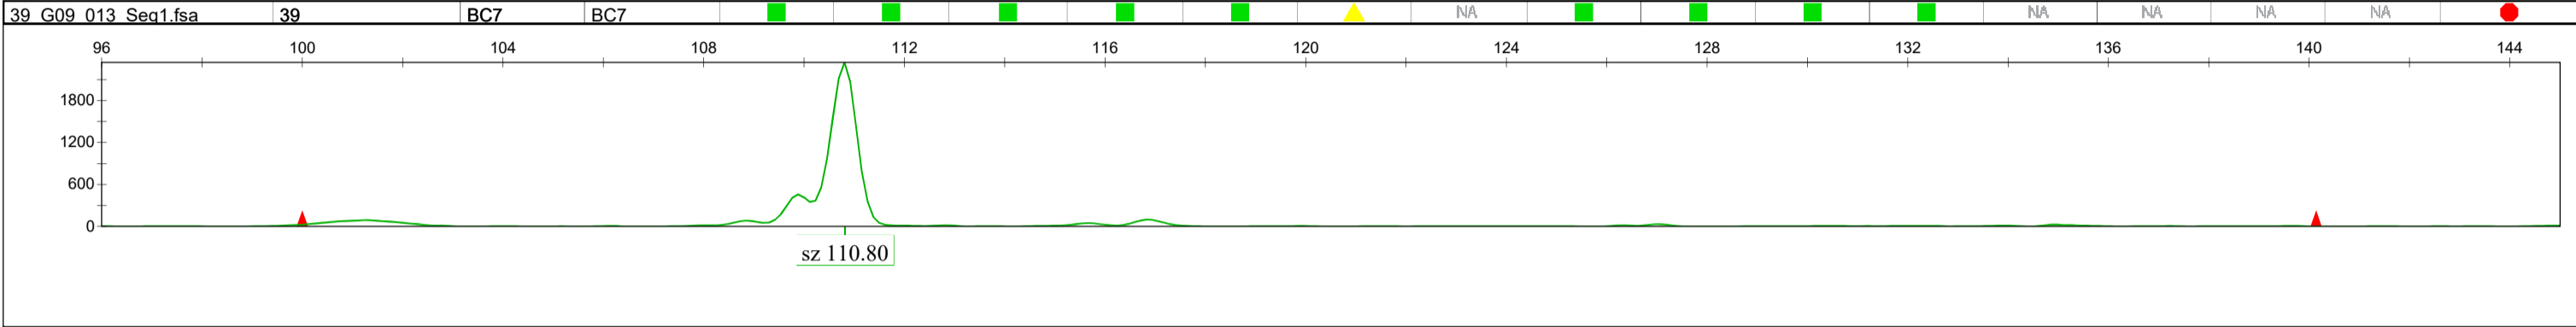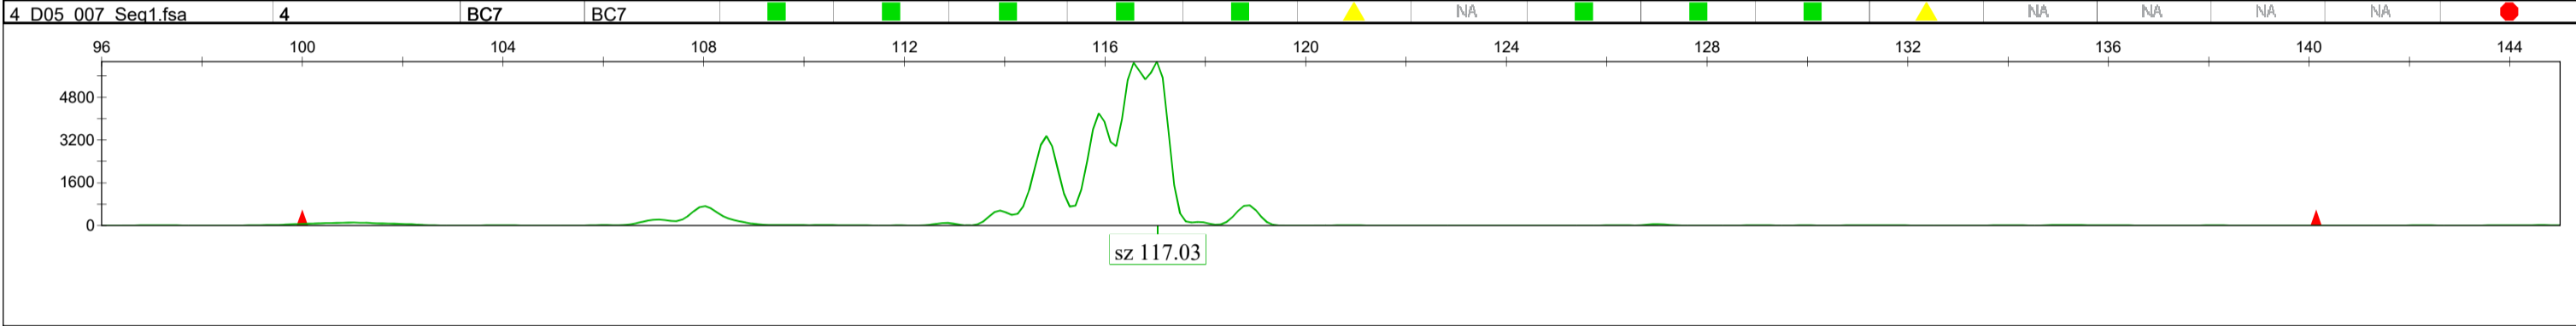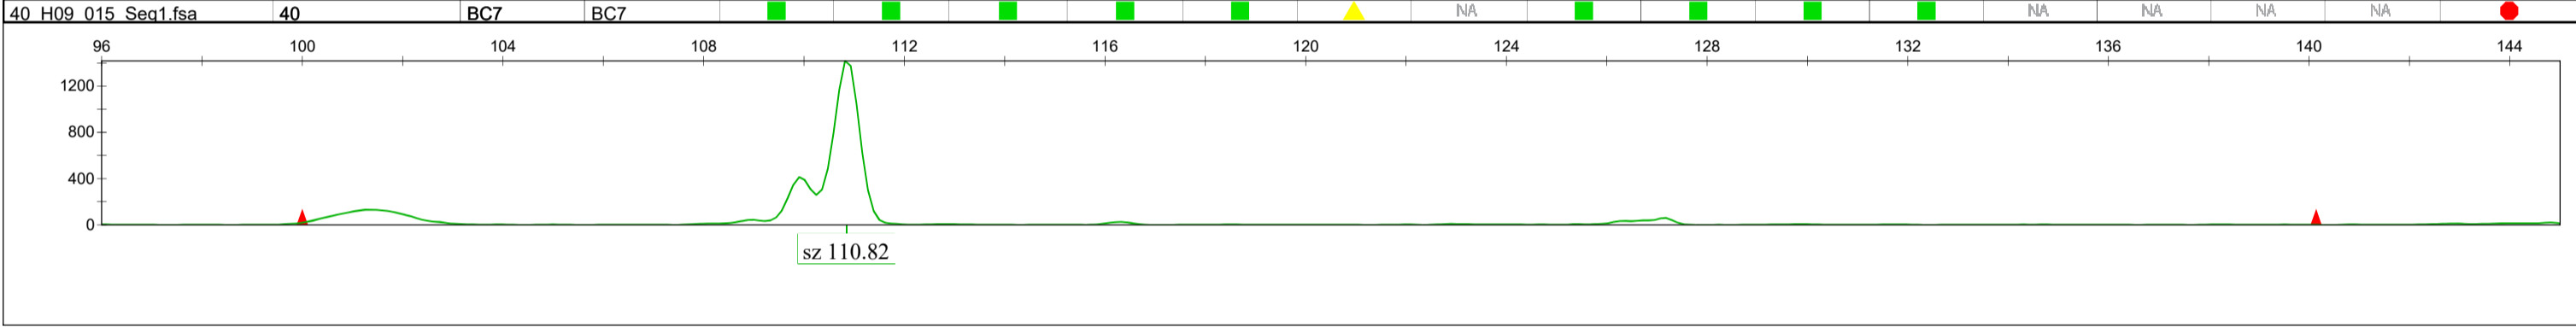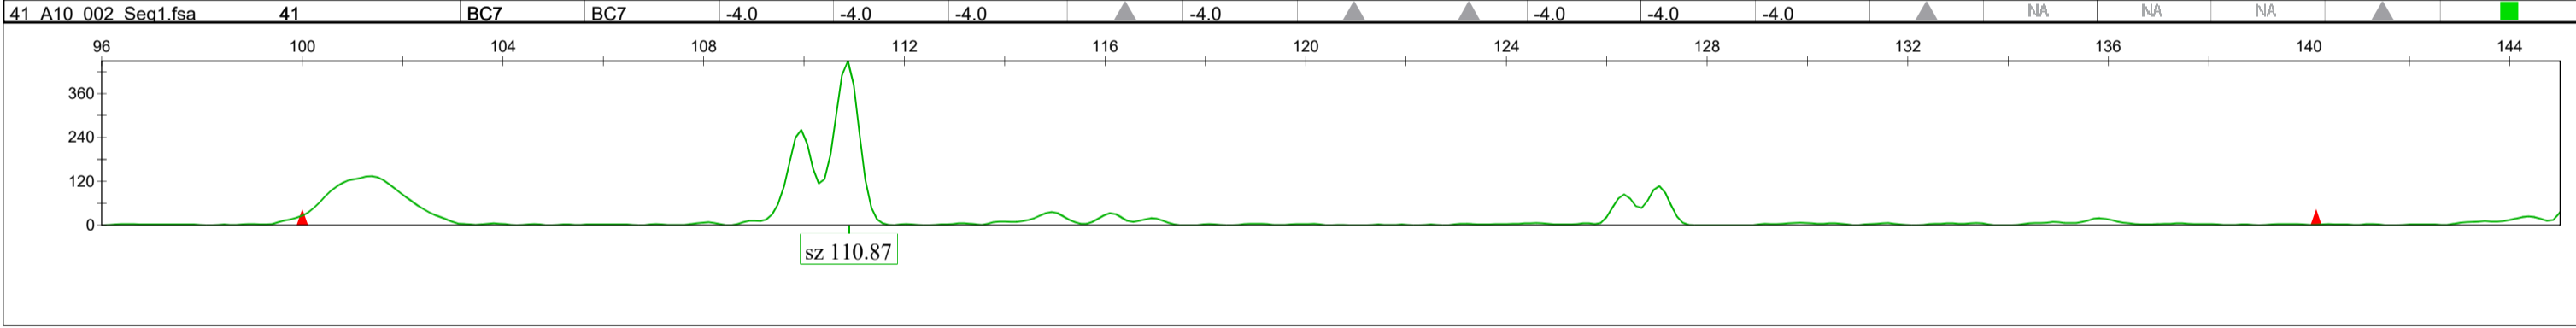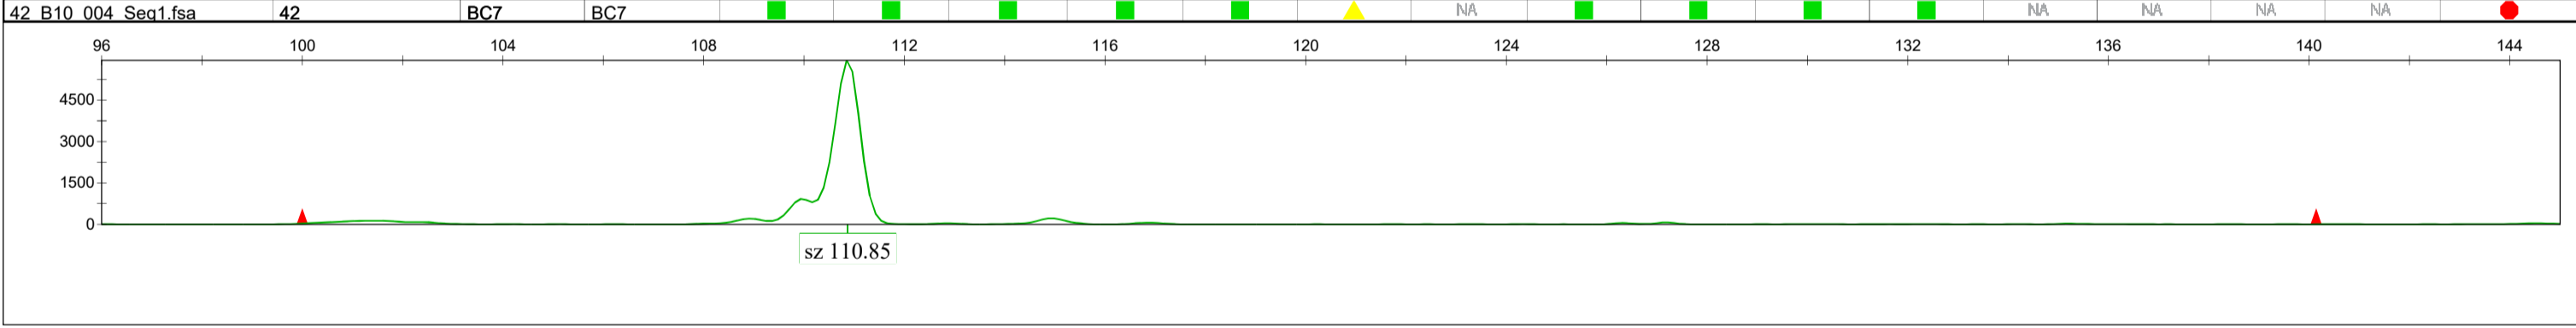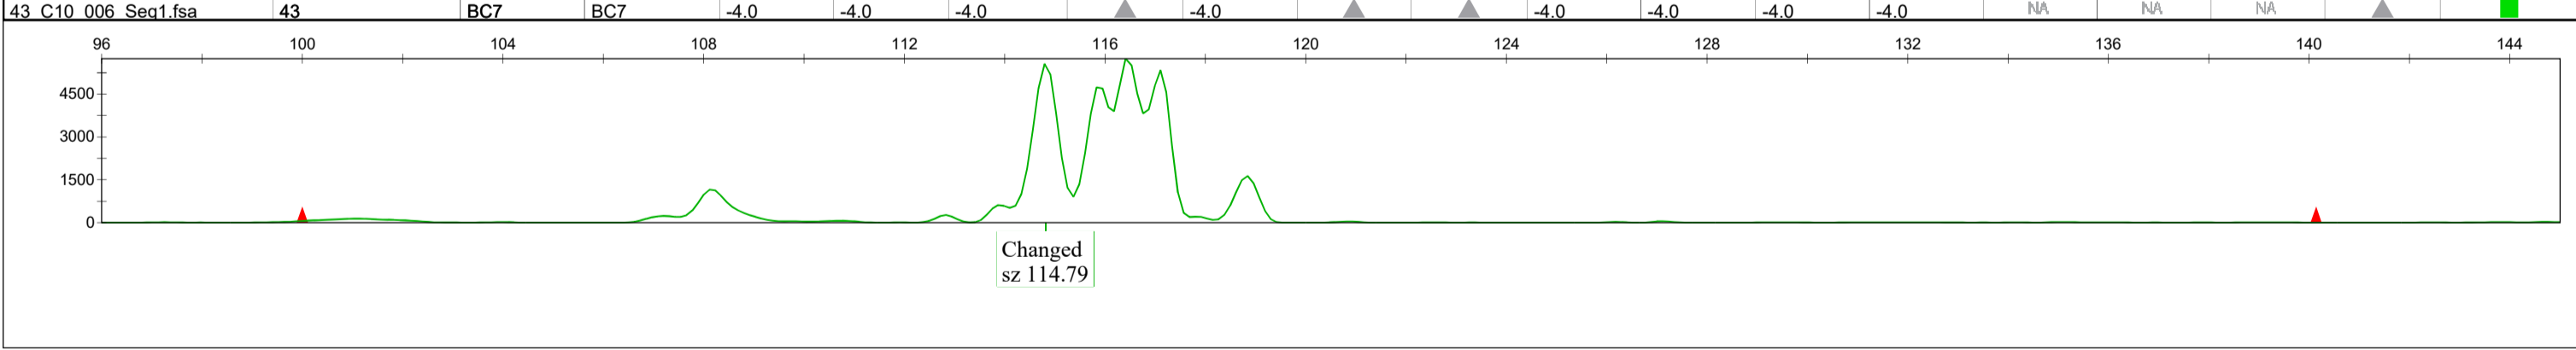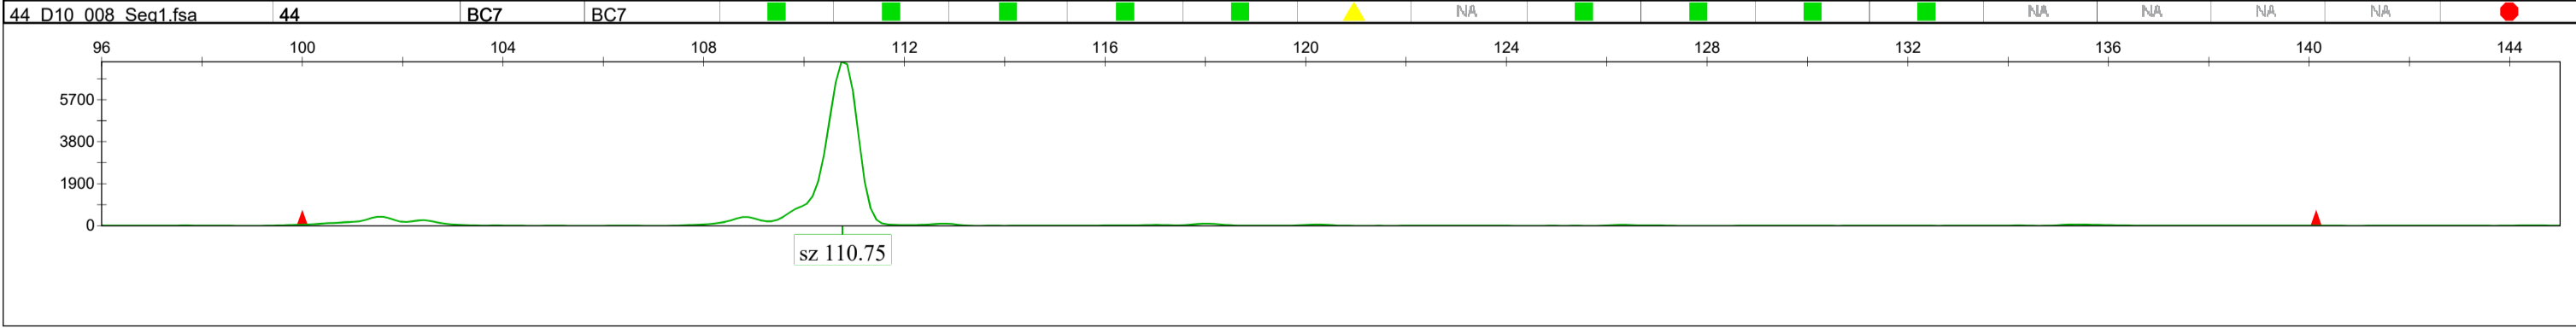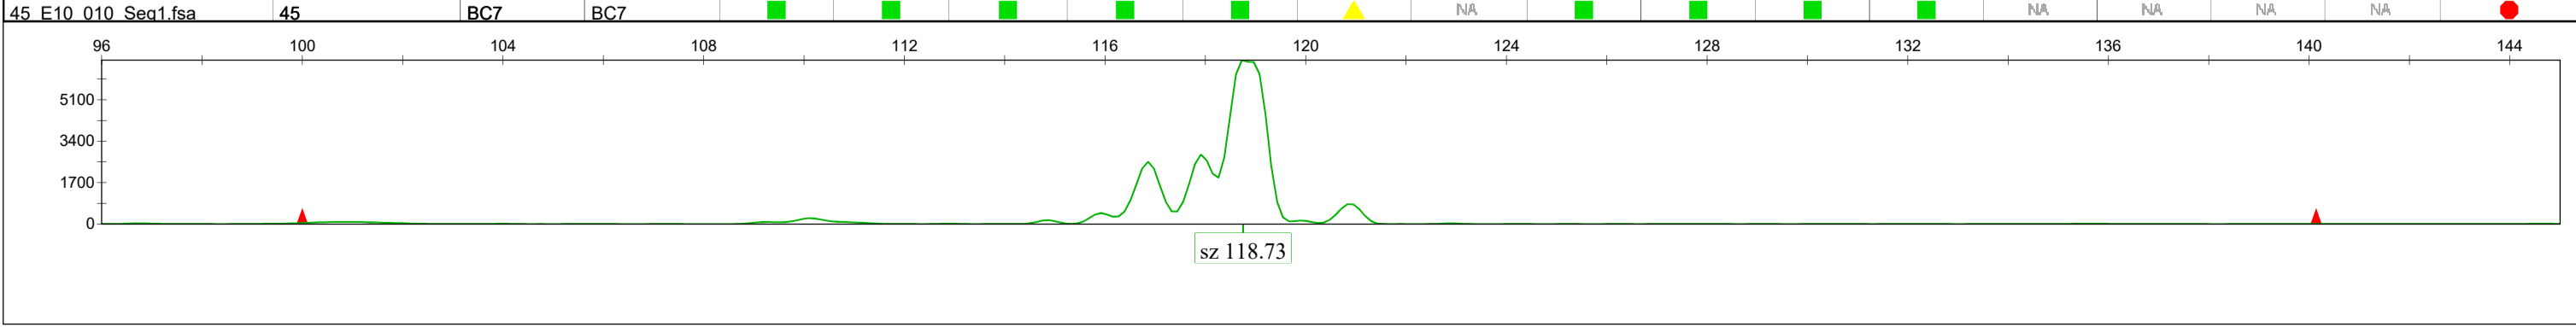

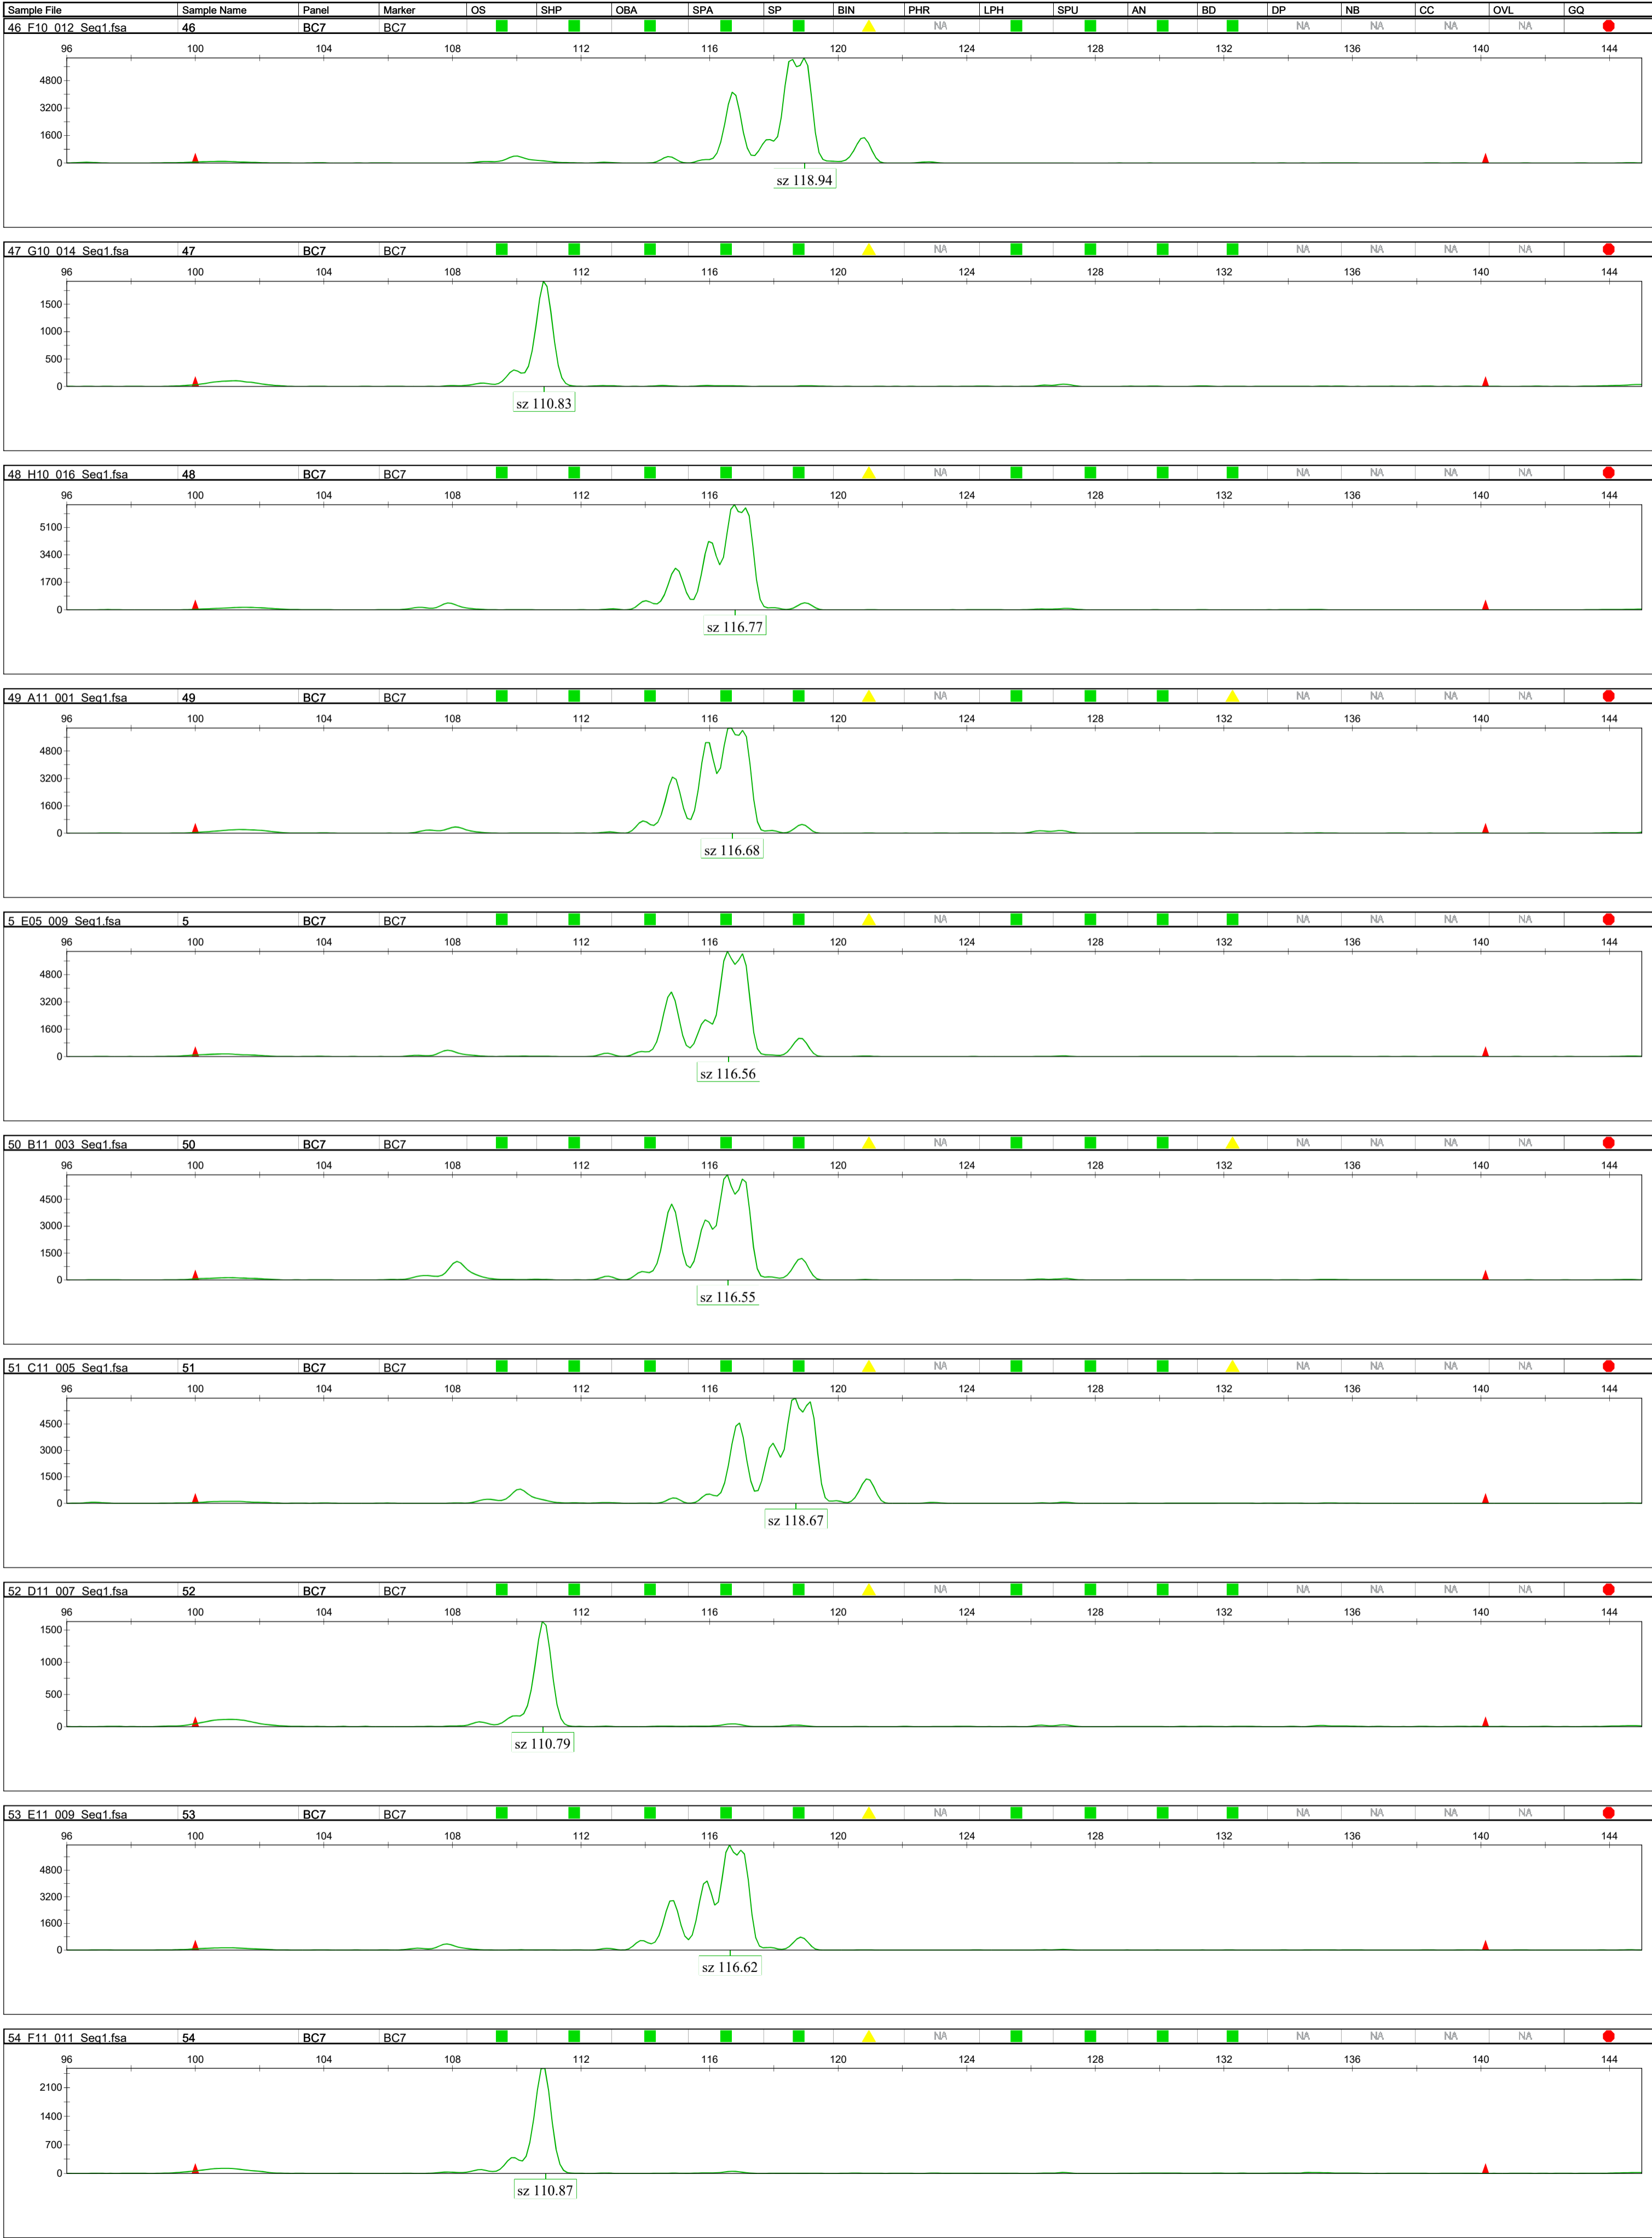

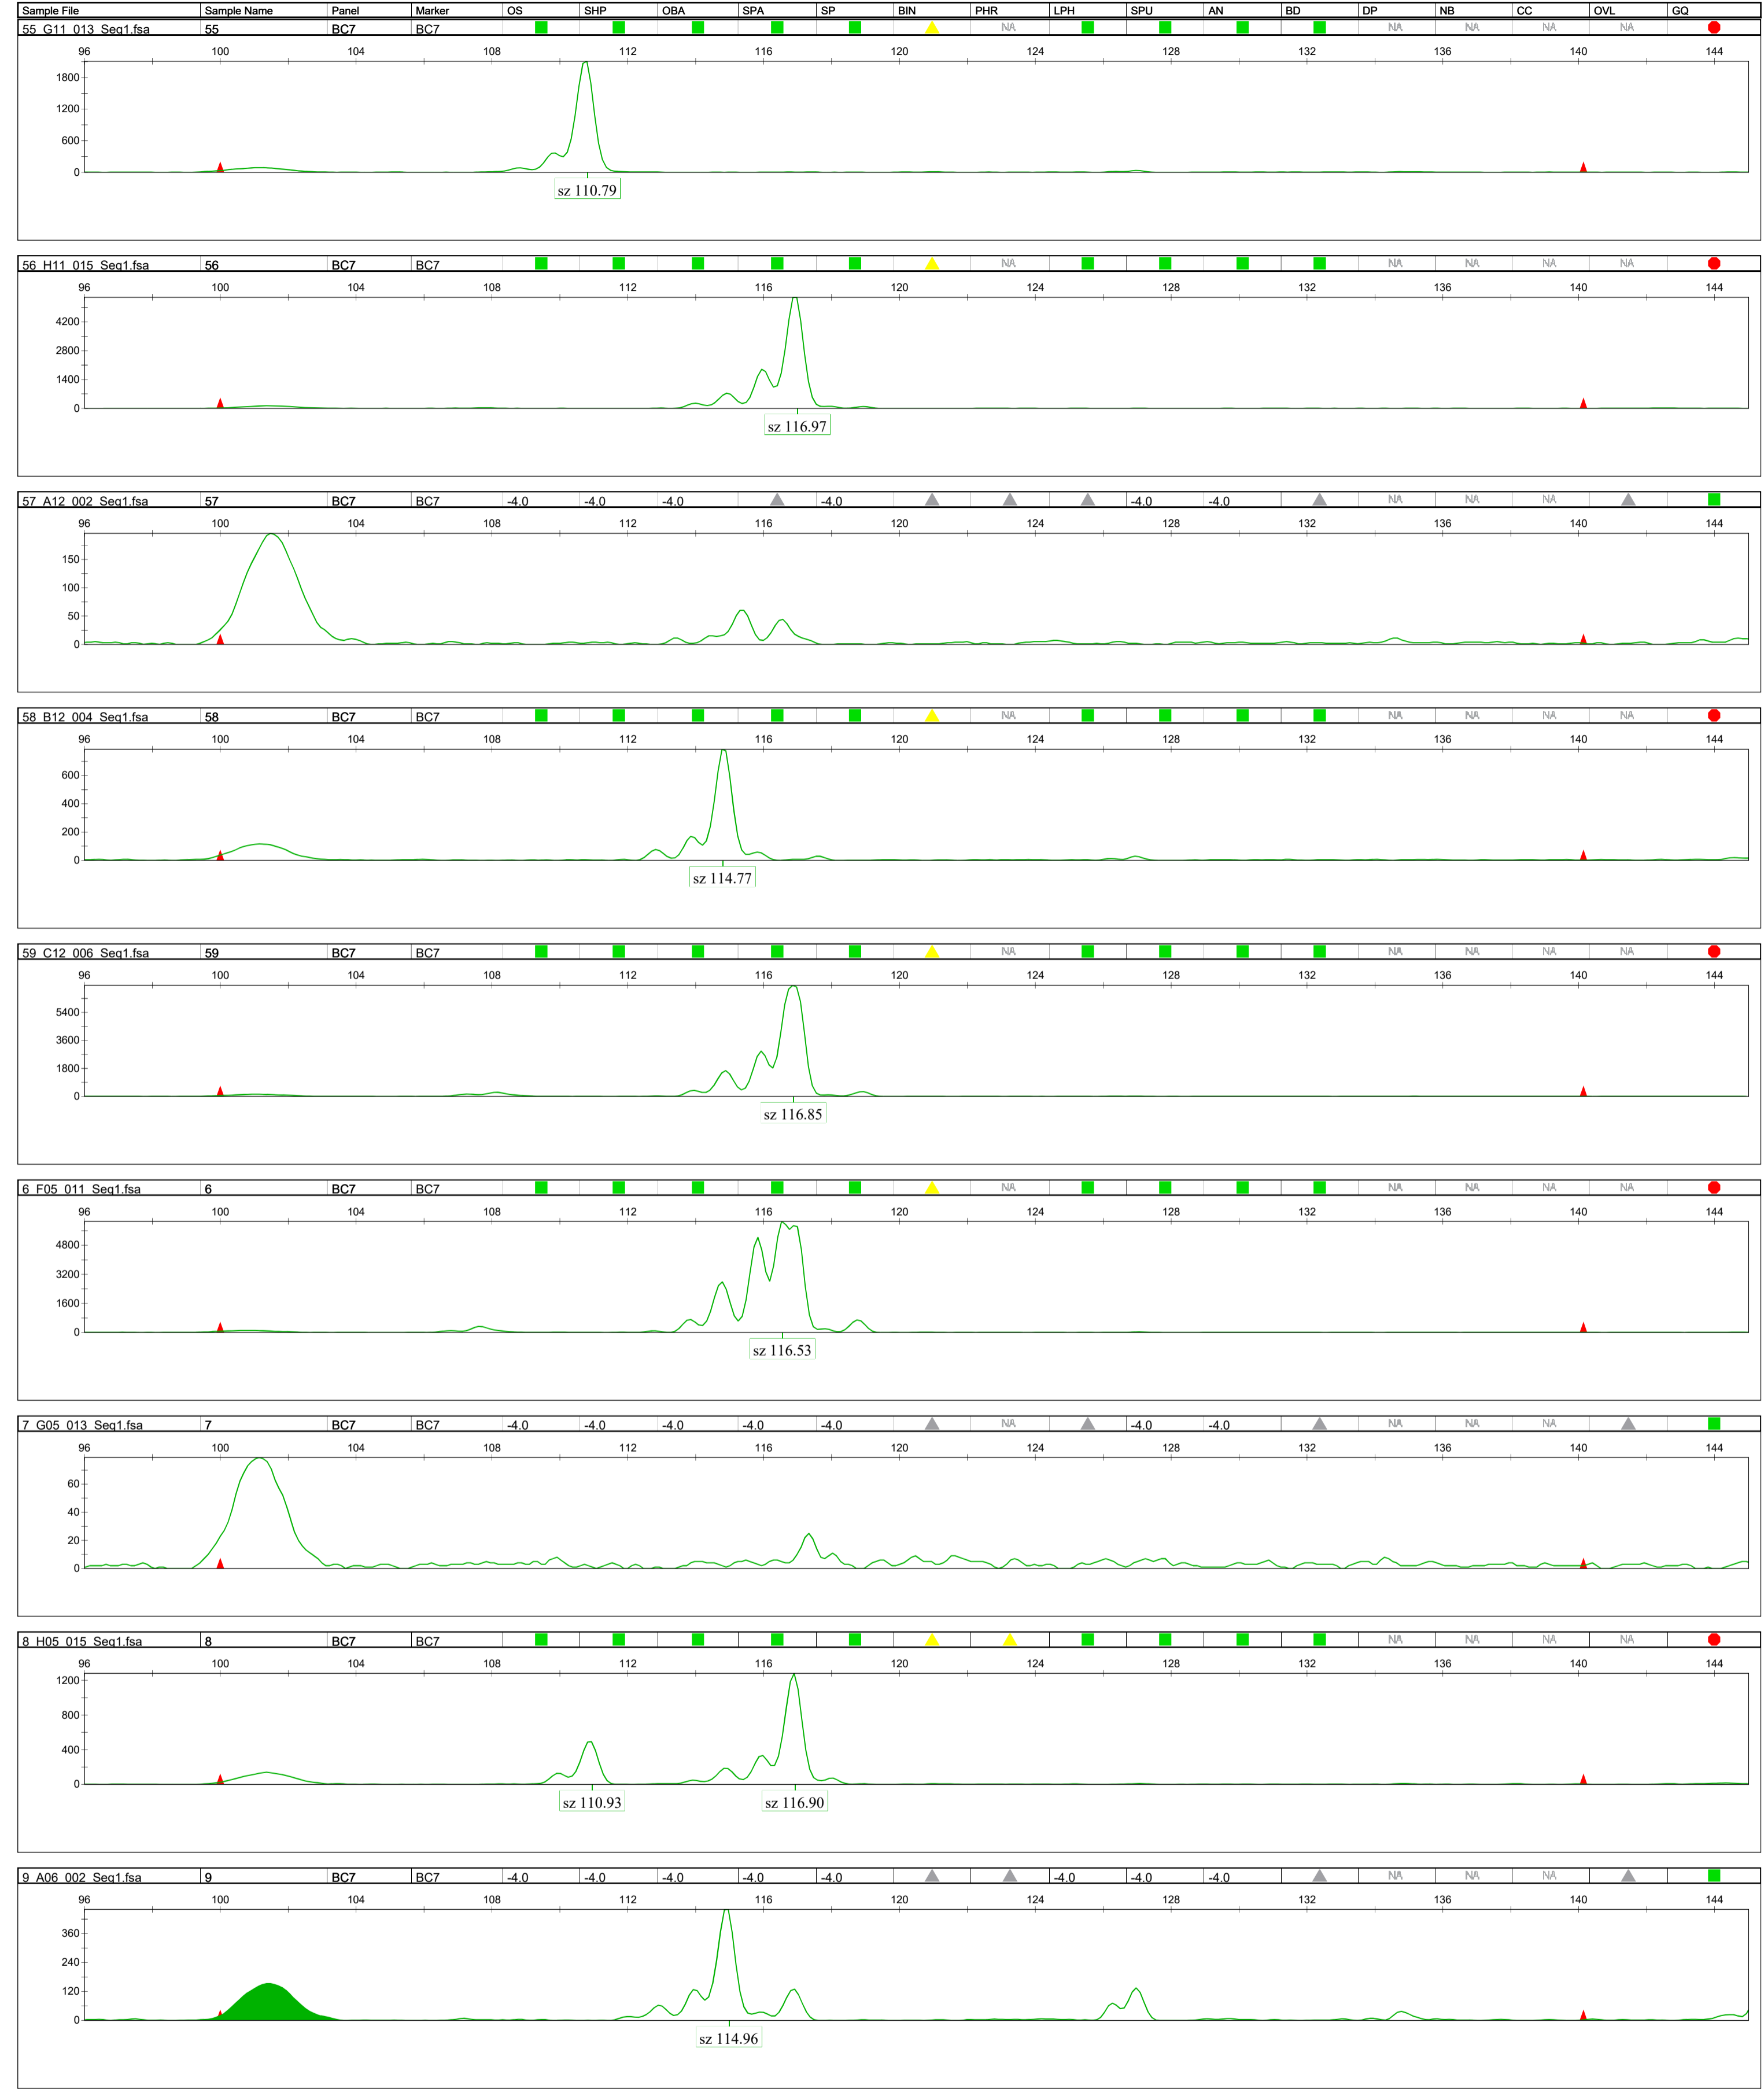

Supplement: s1 [file s1 › BC7.pdf]

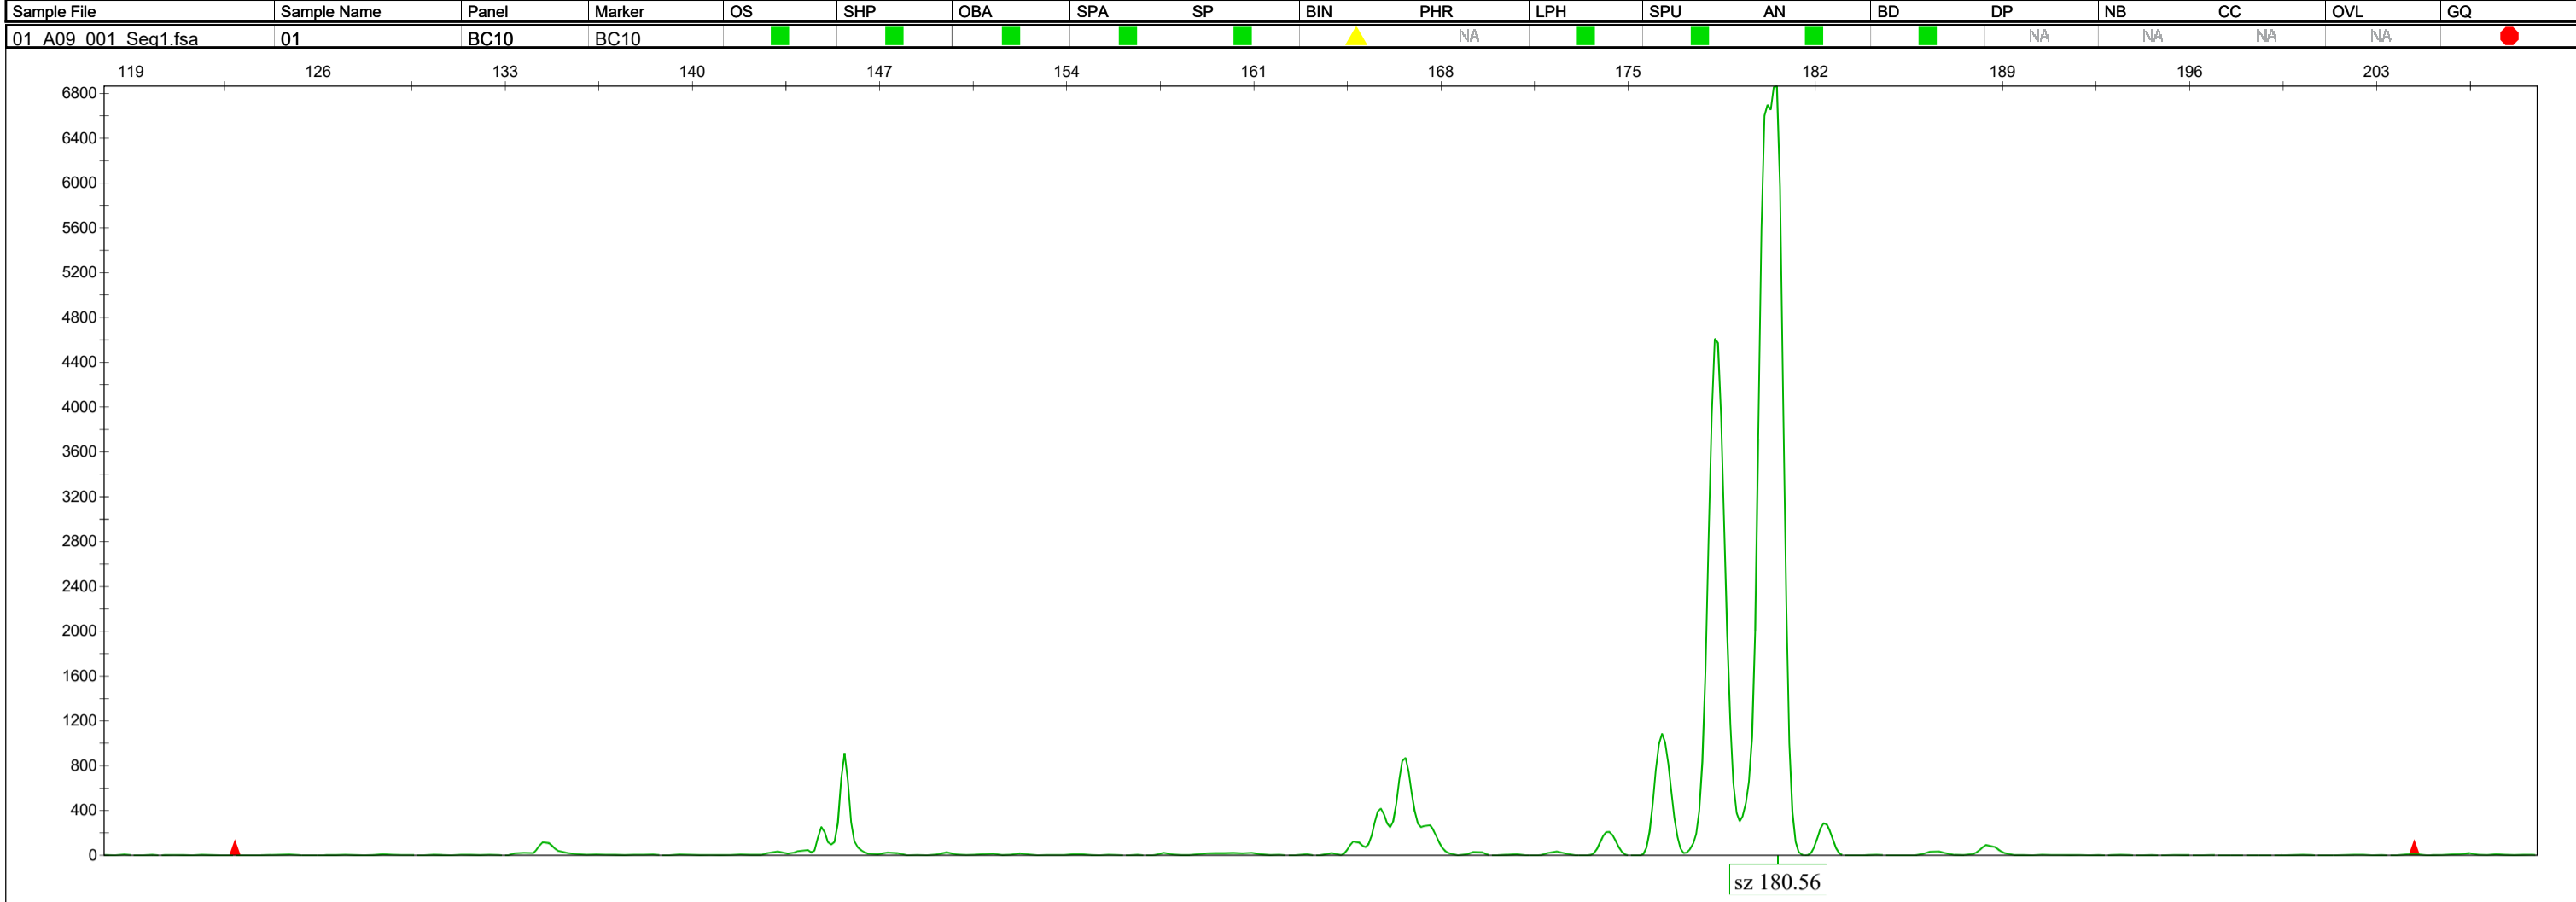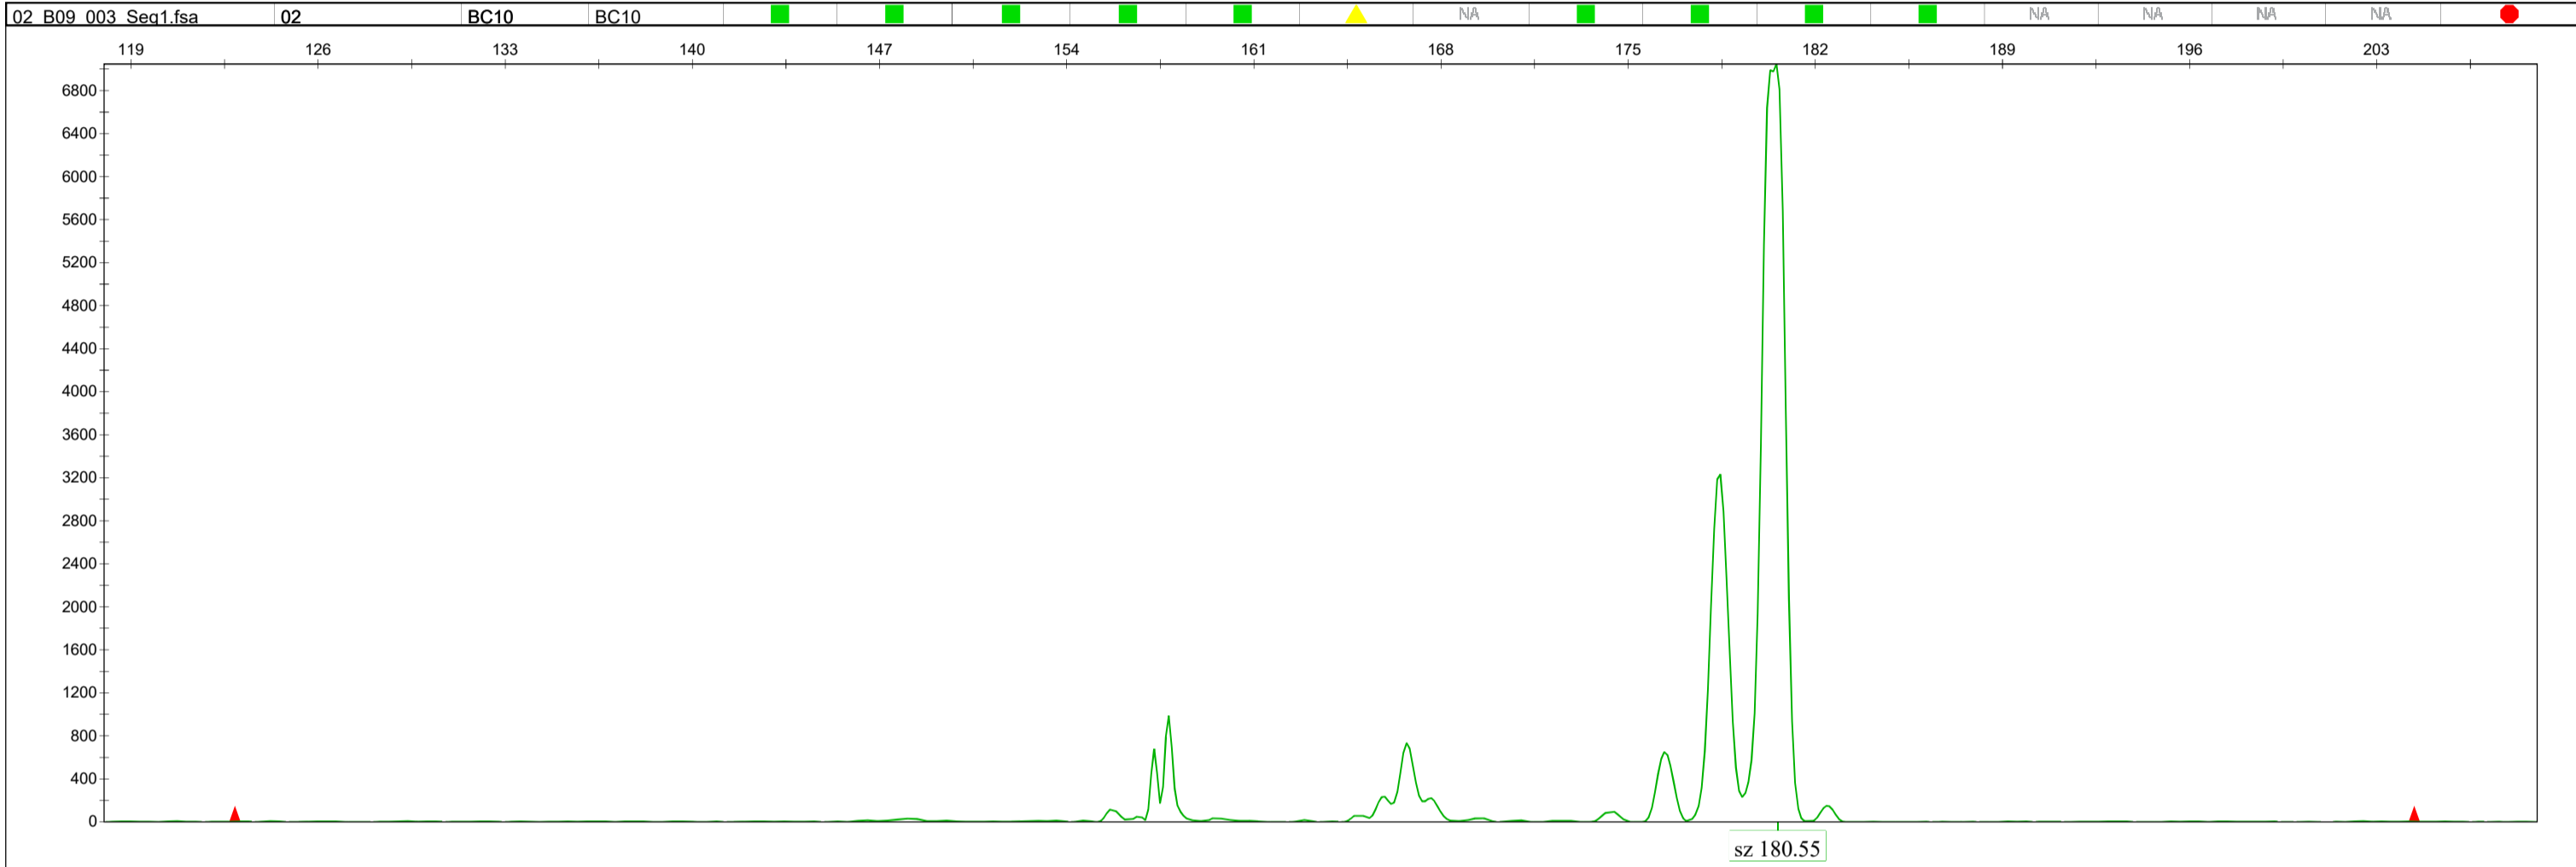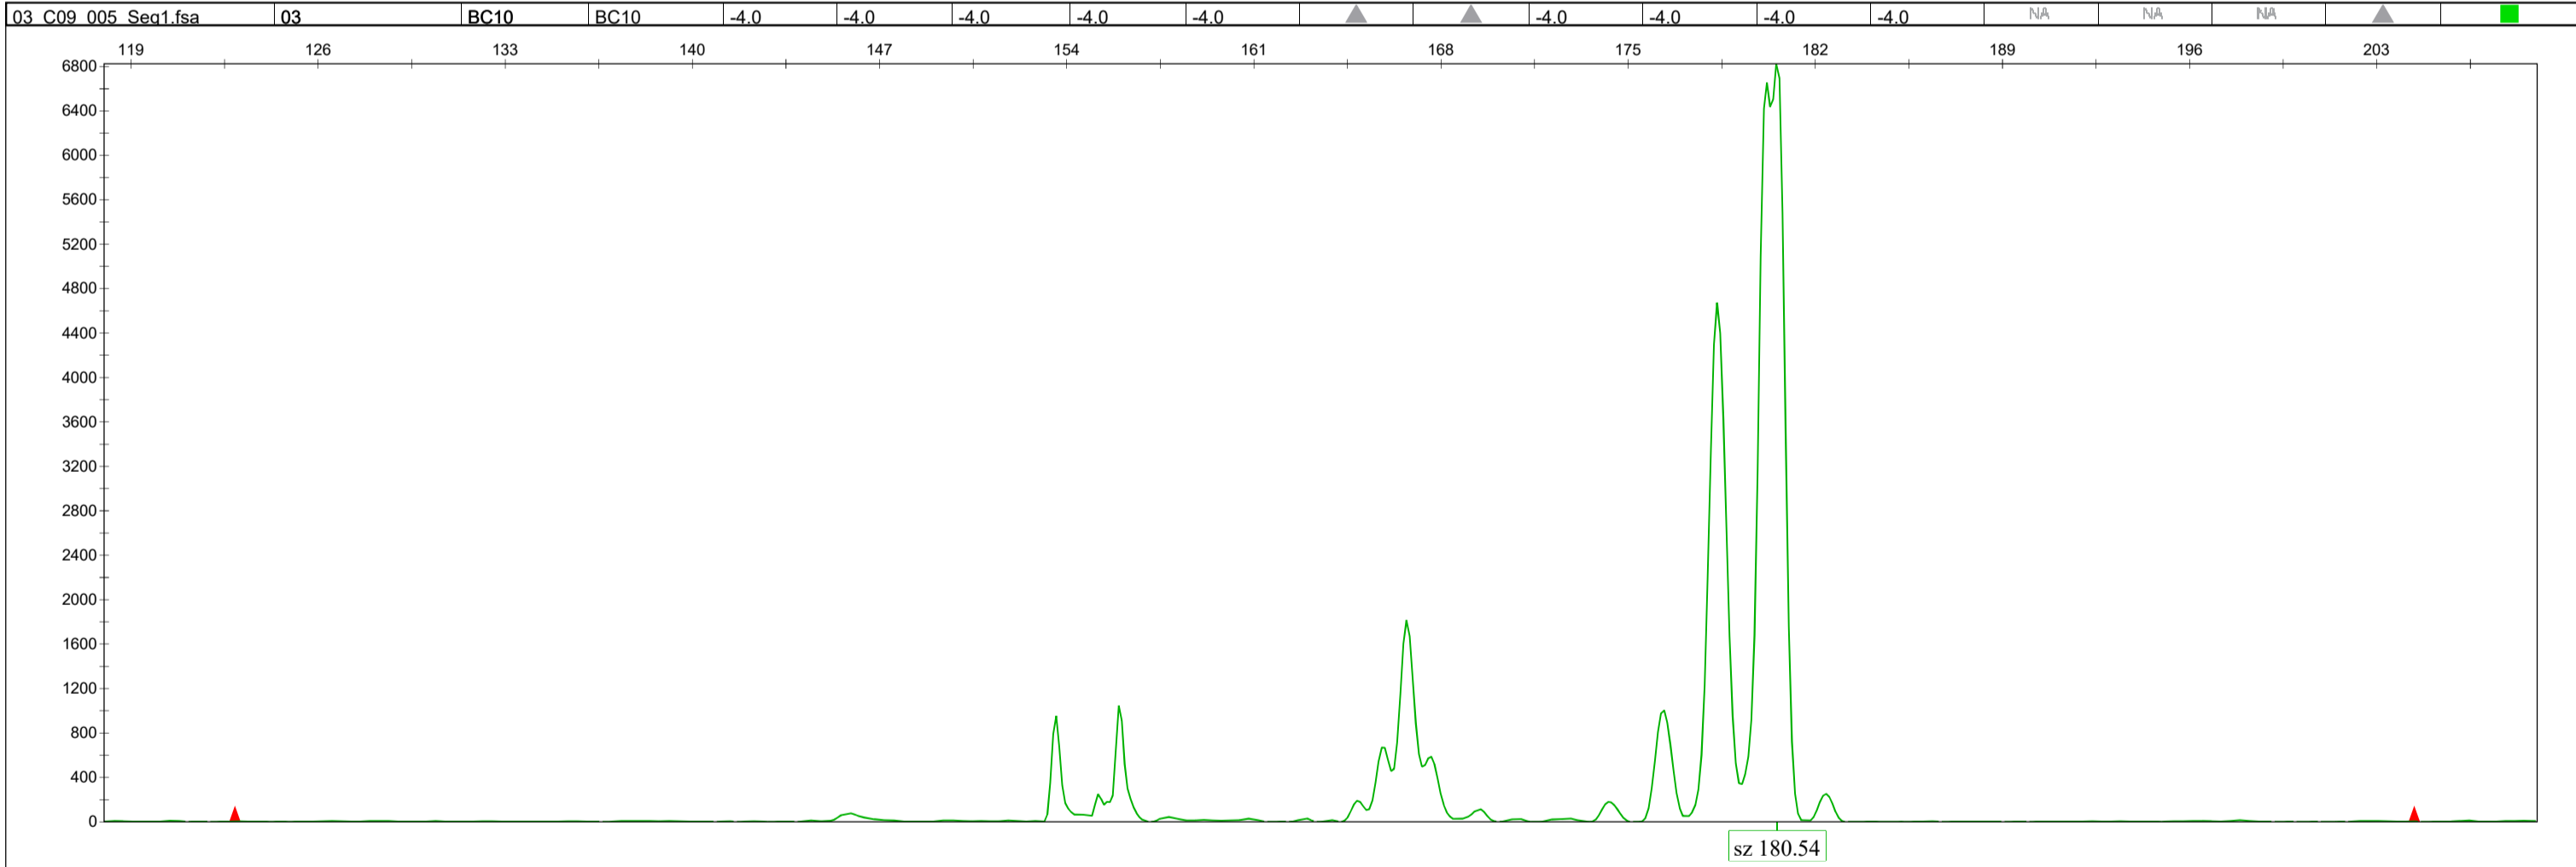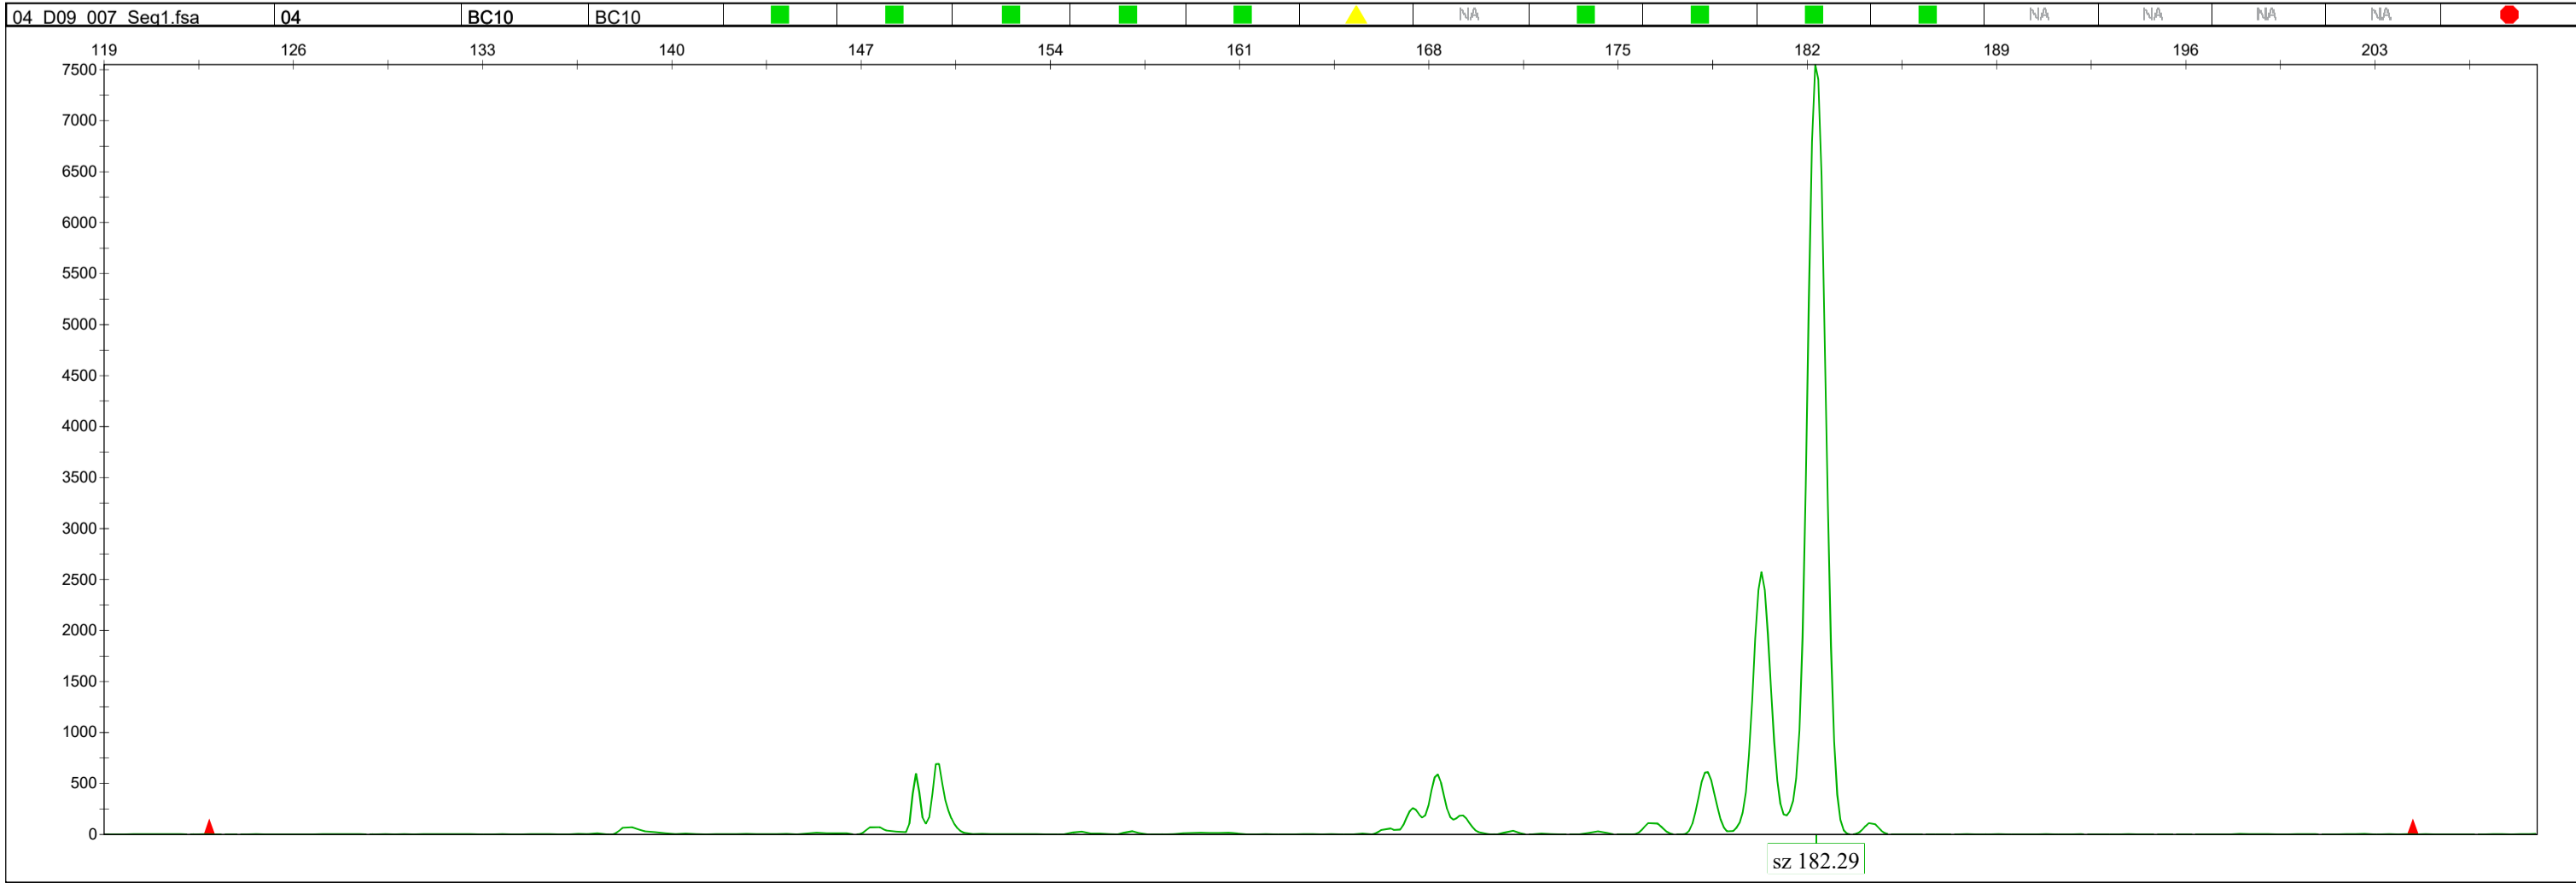

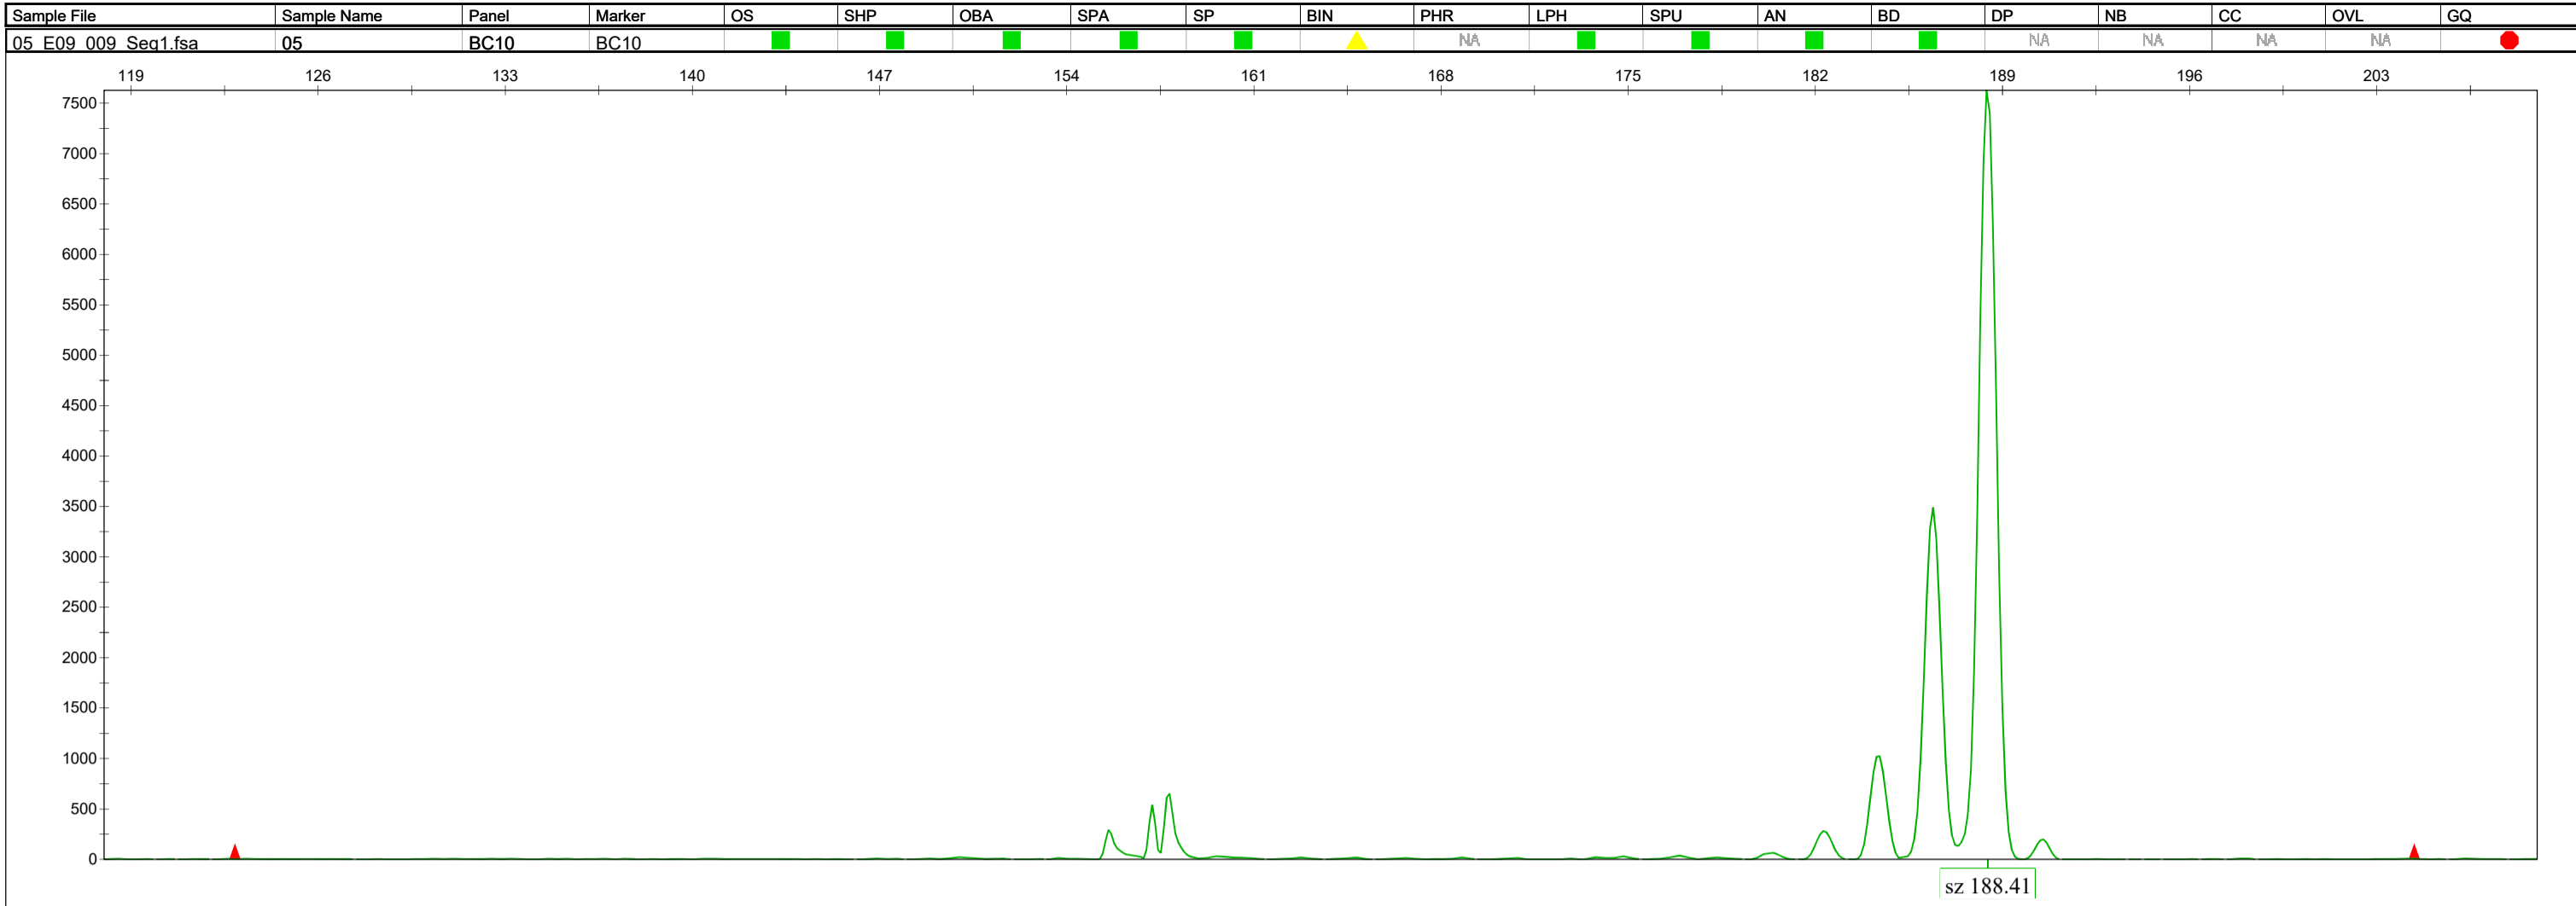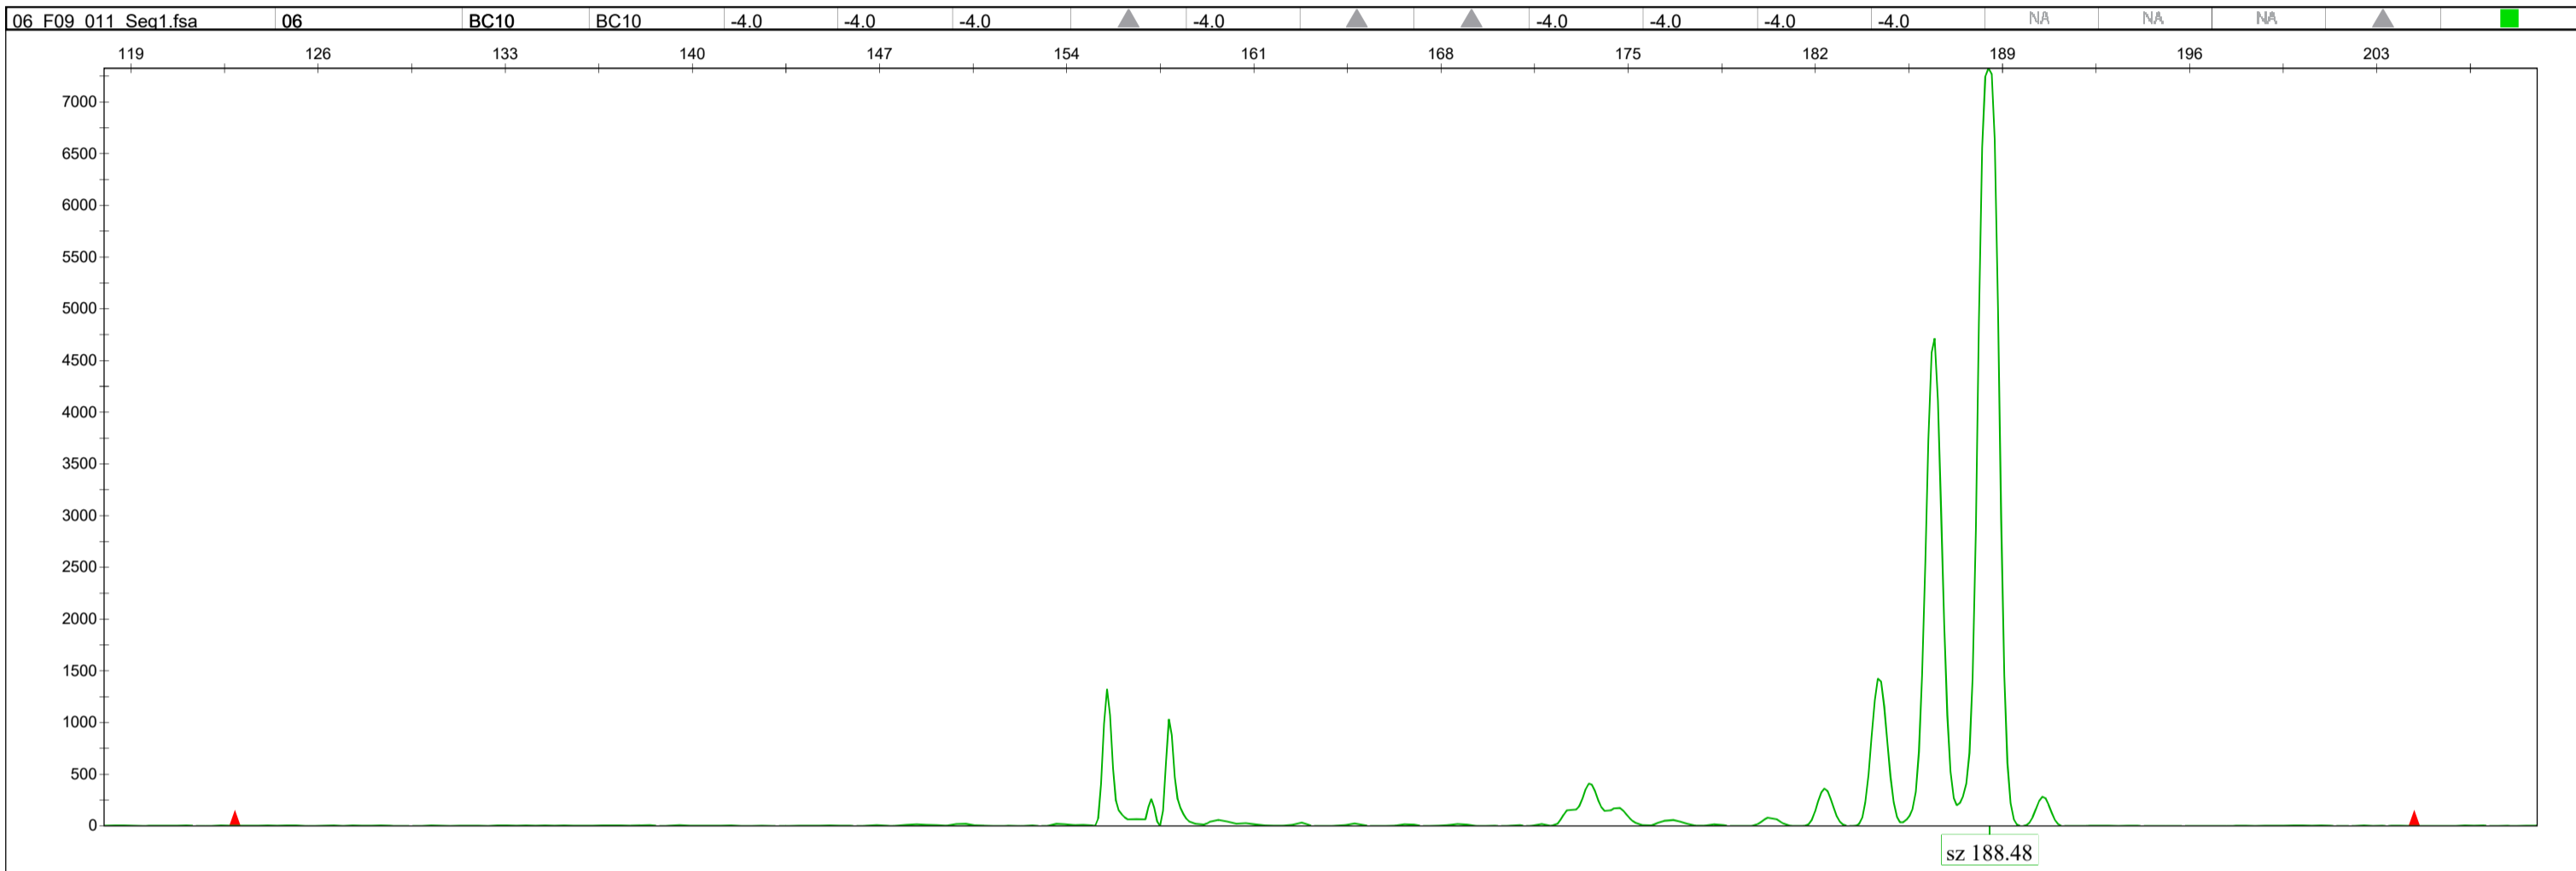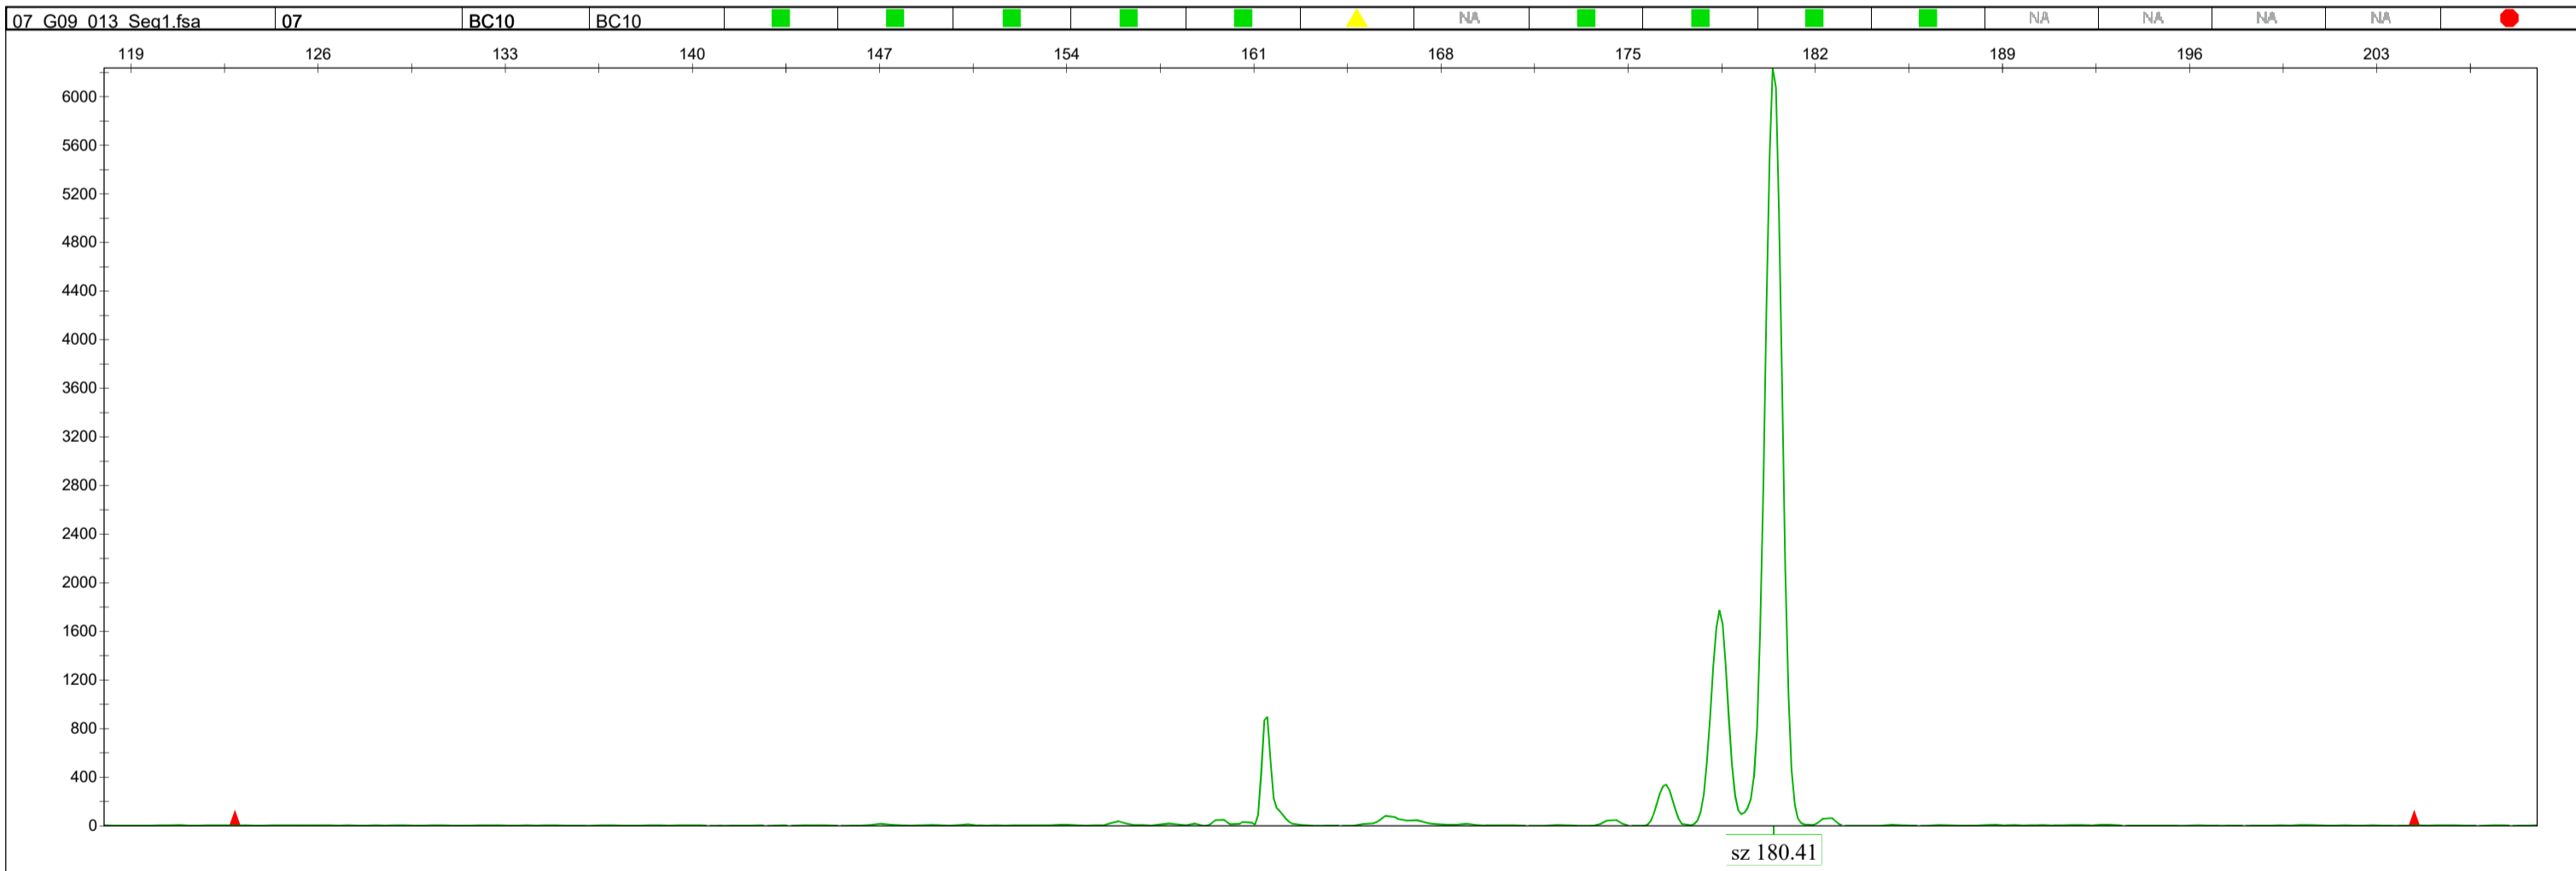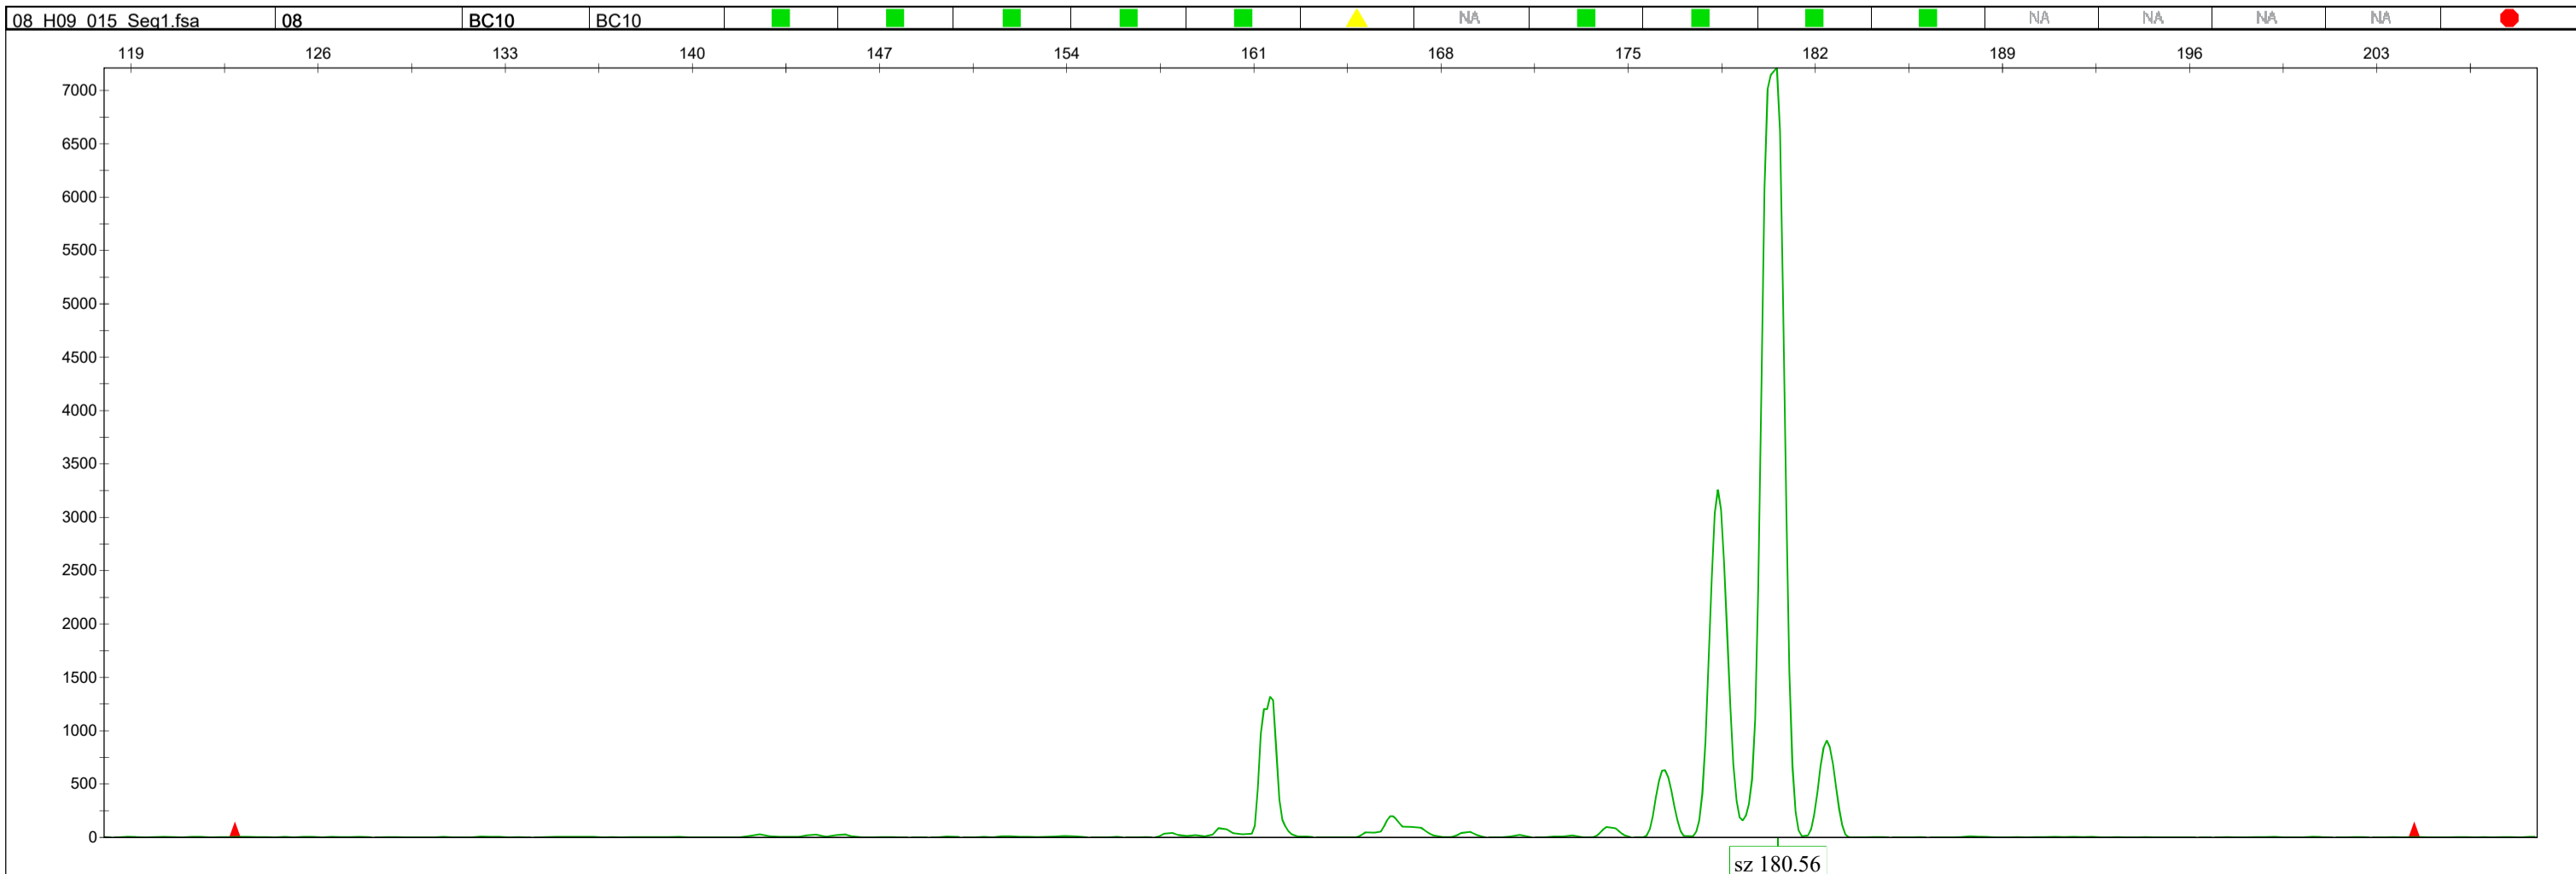

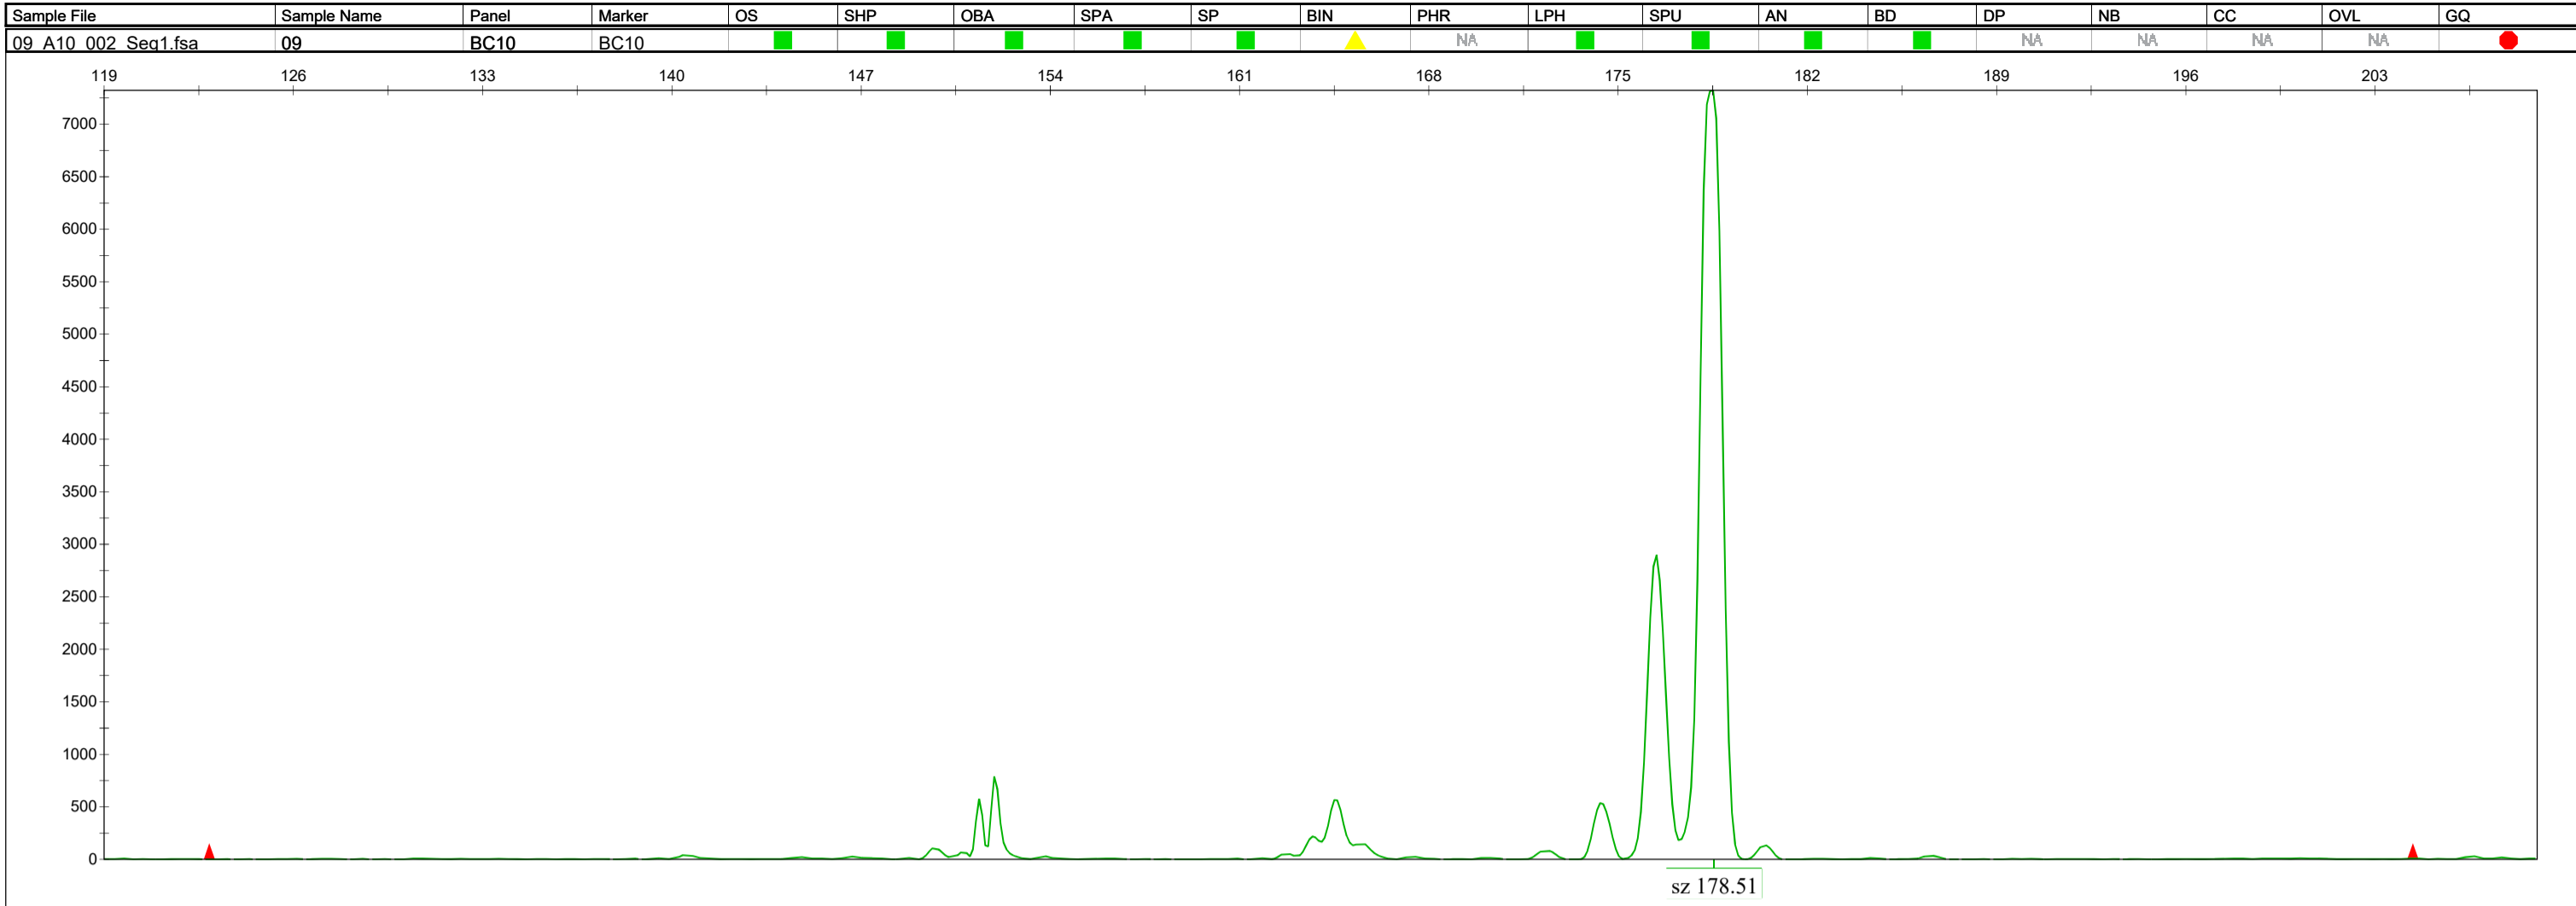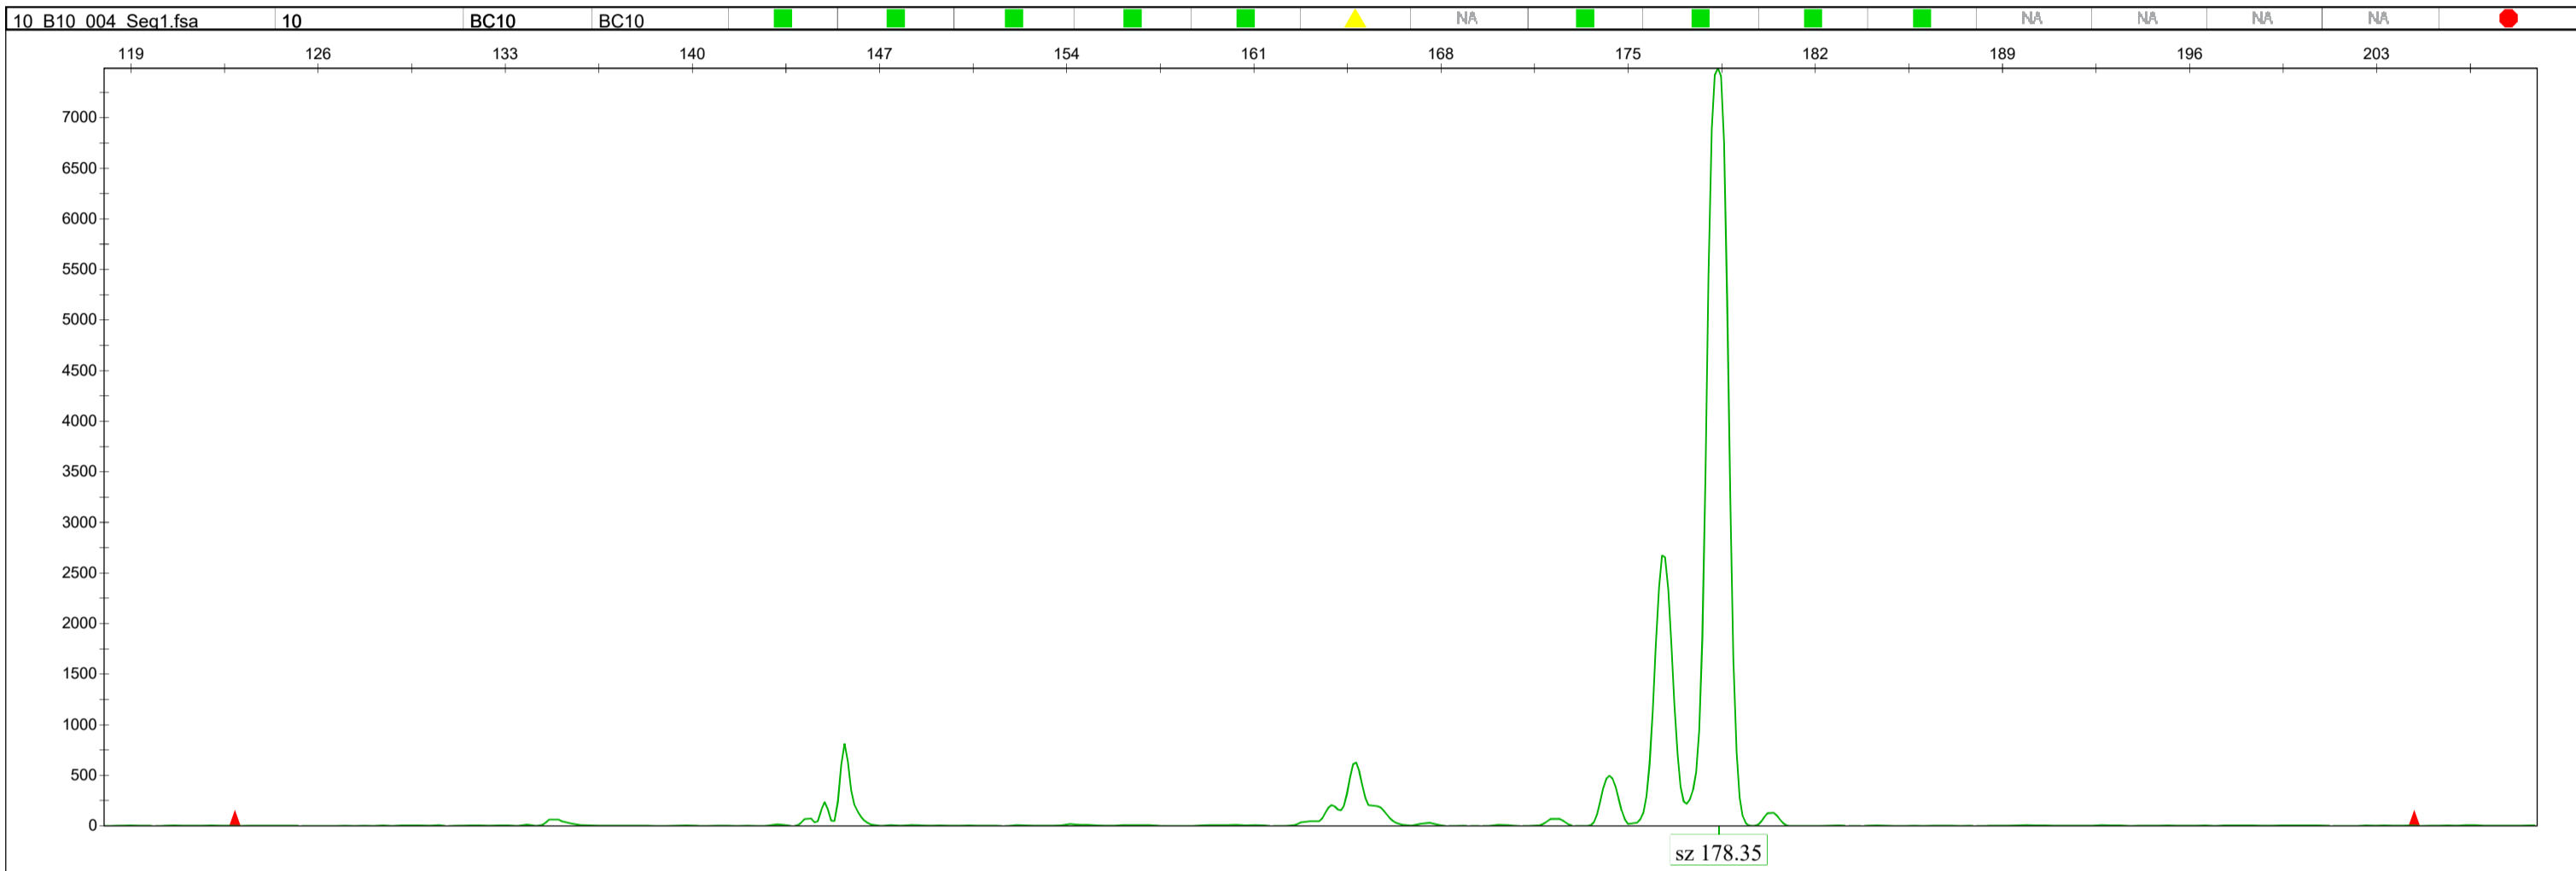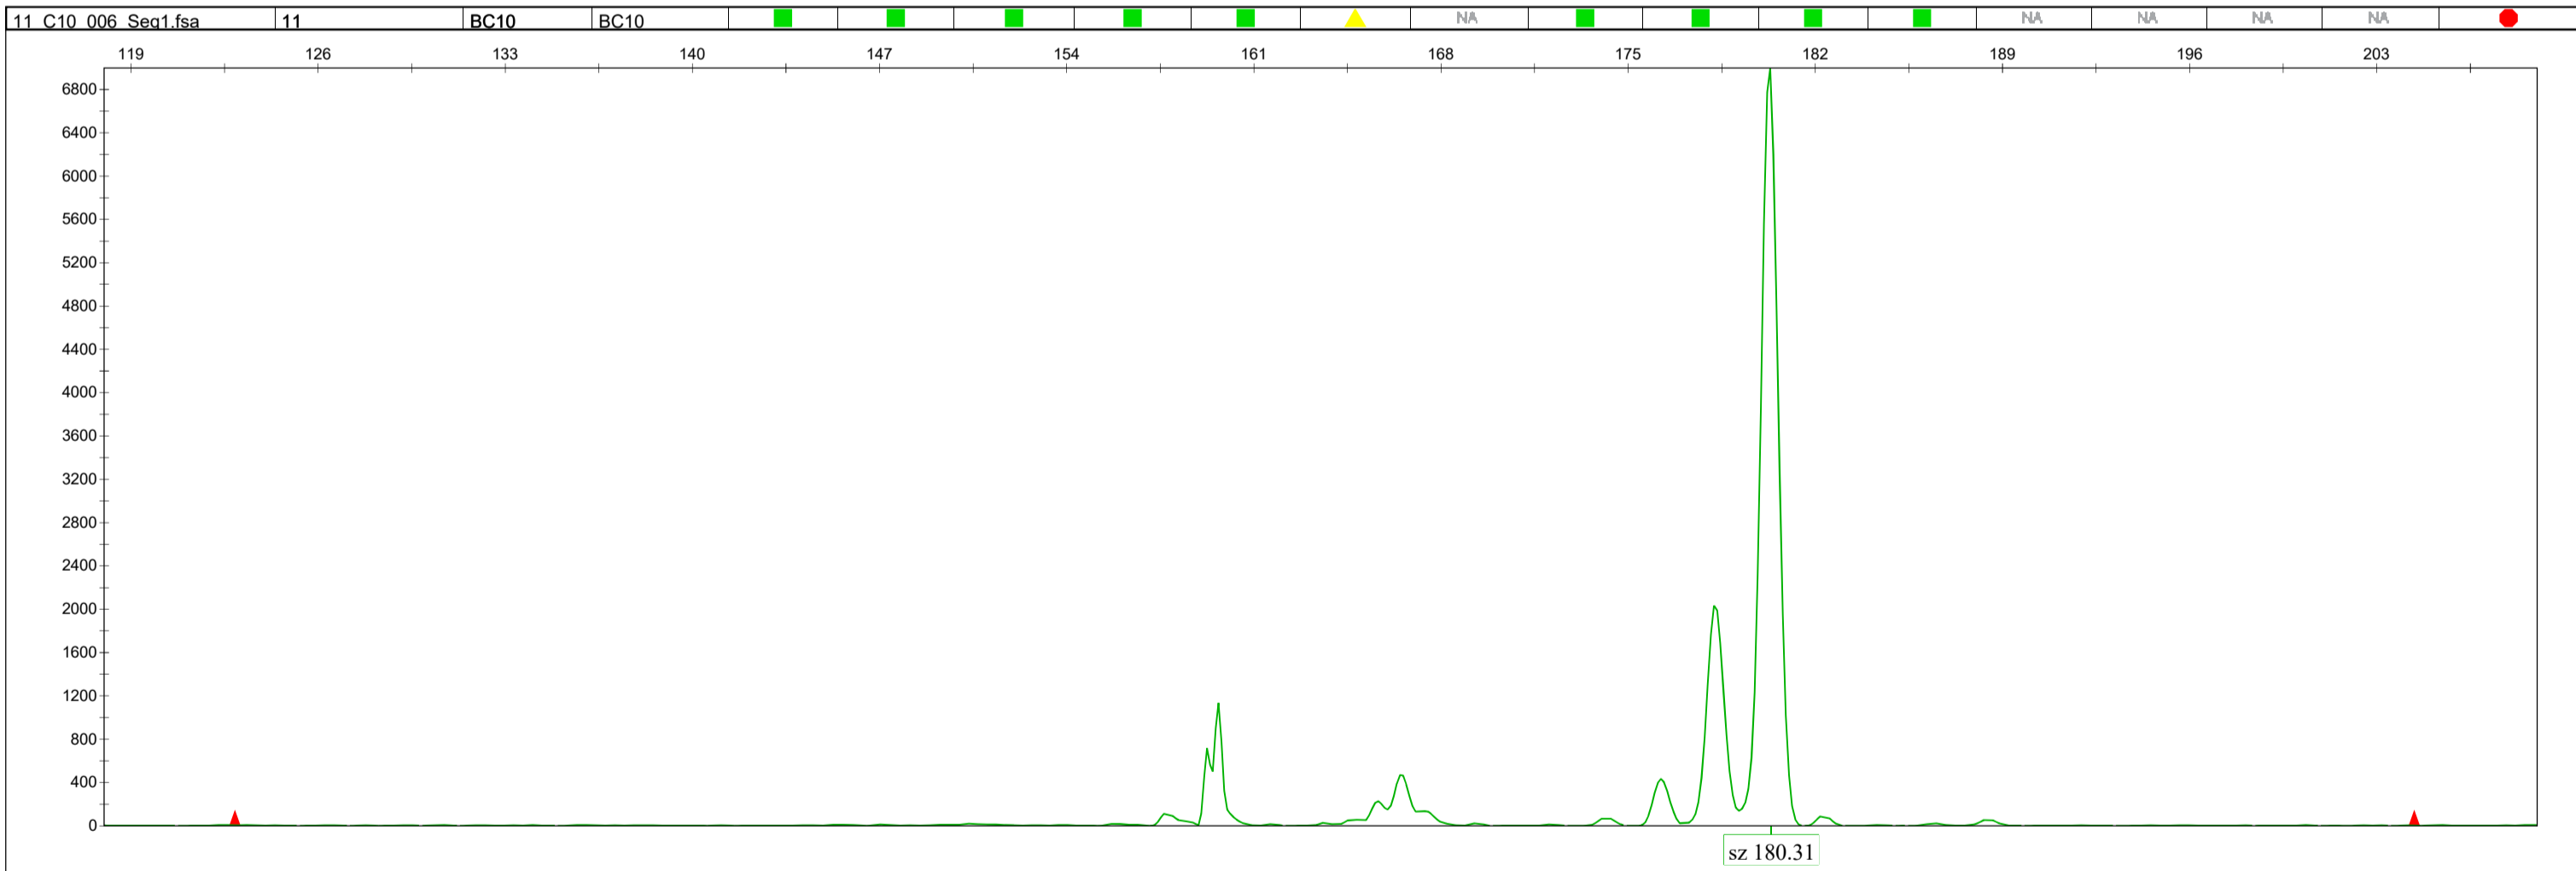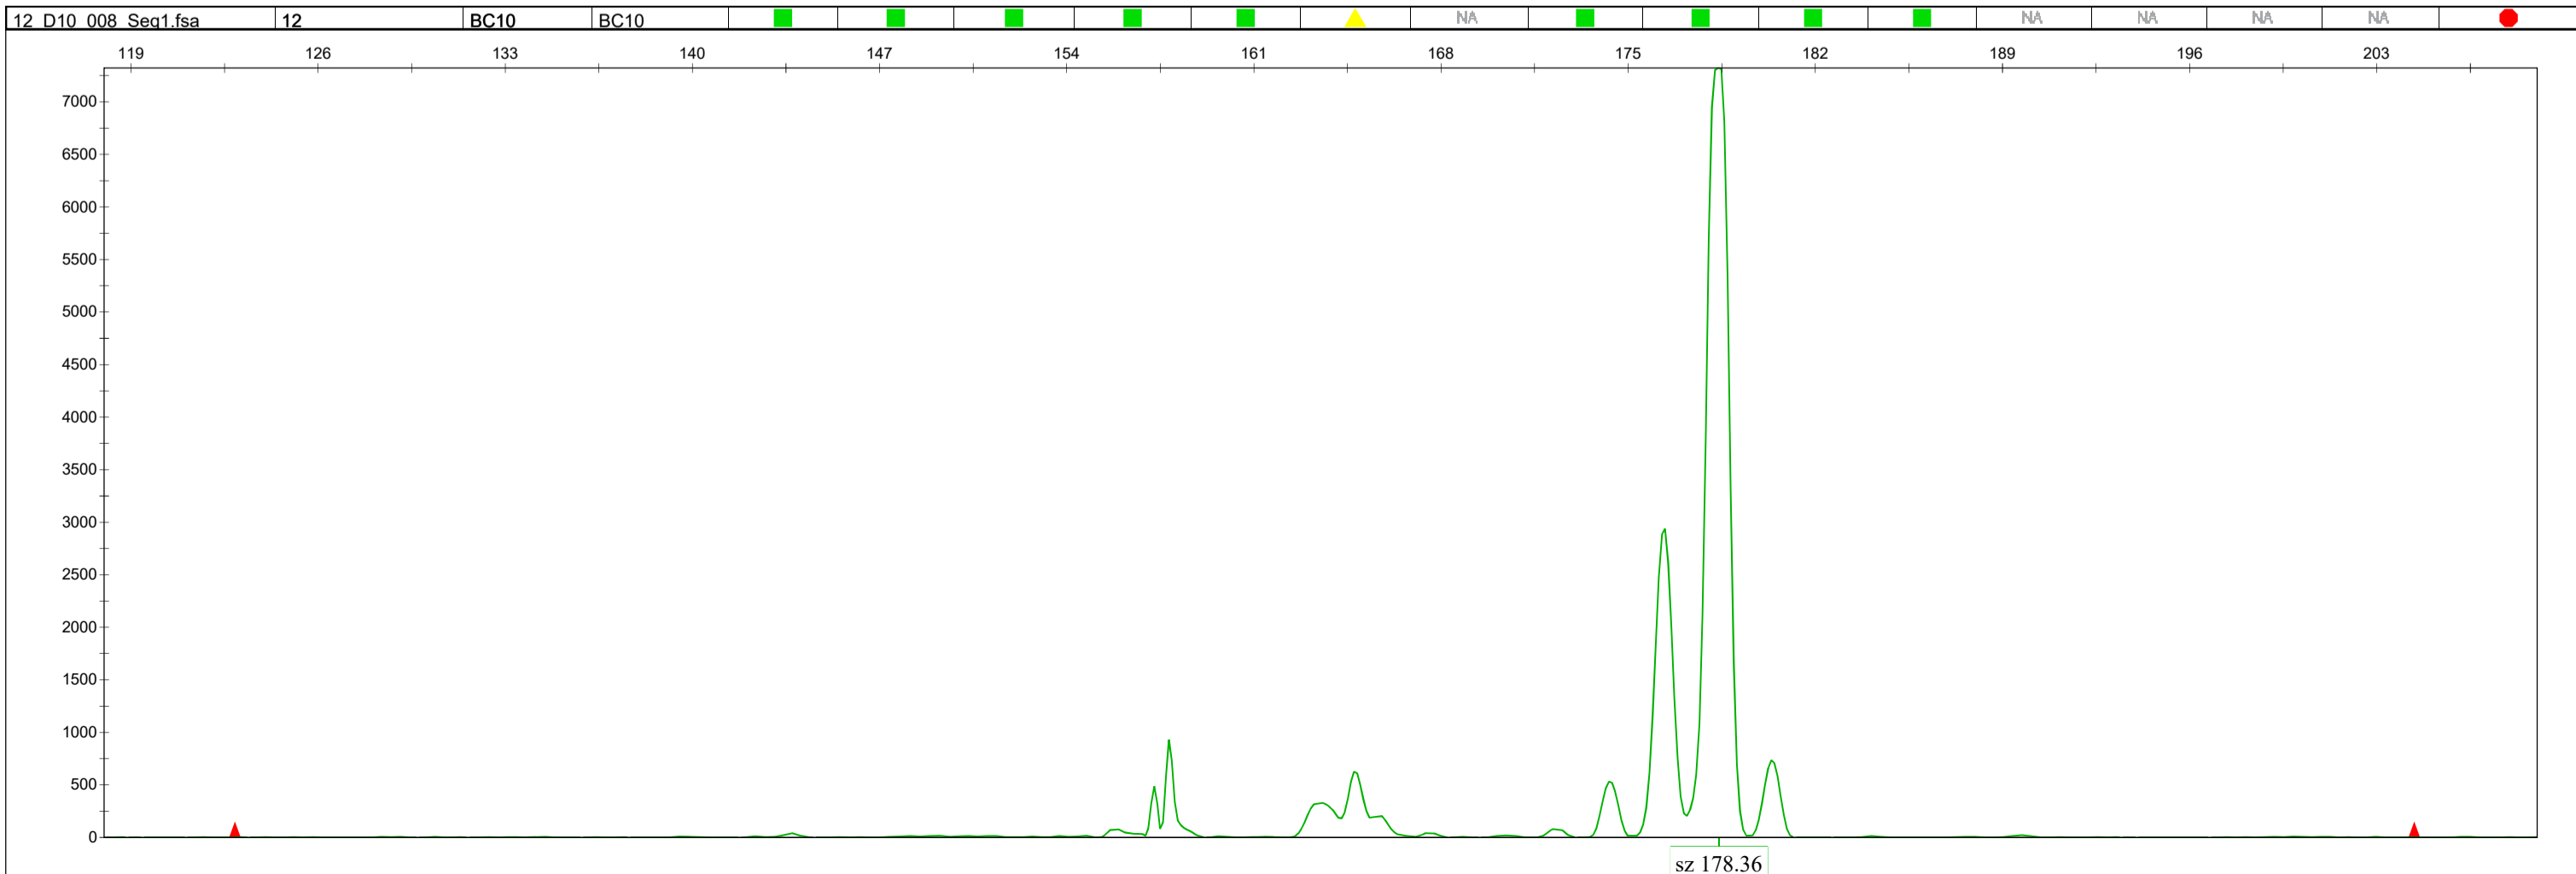

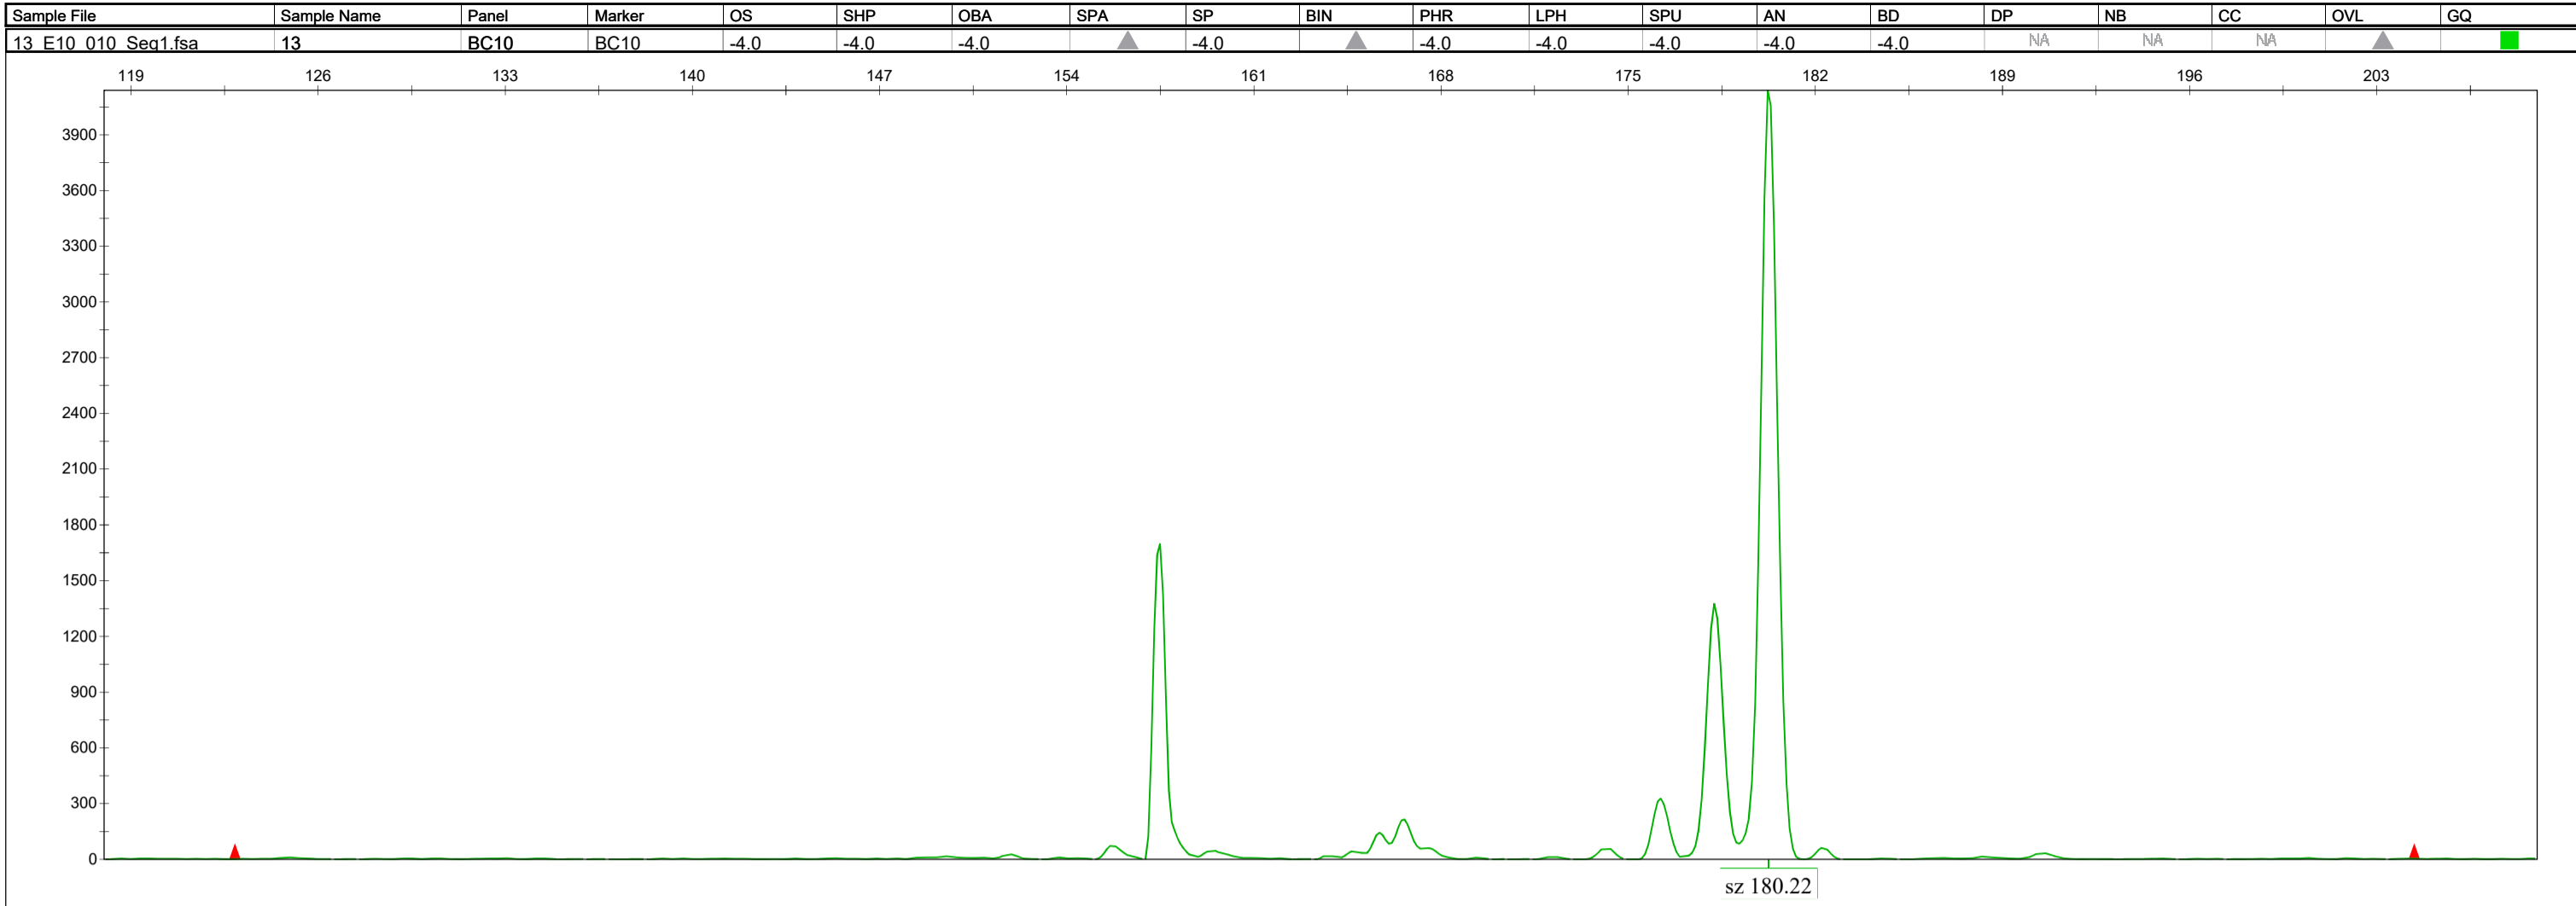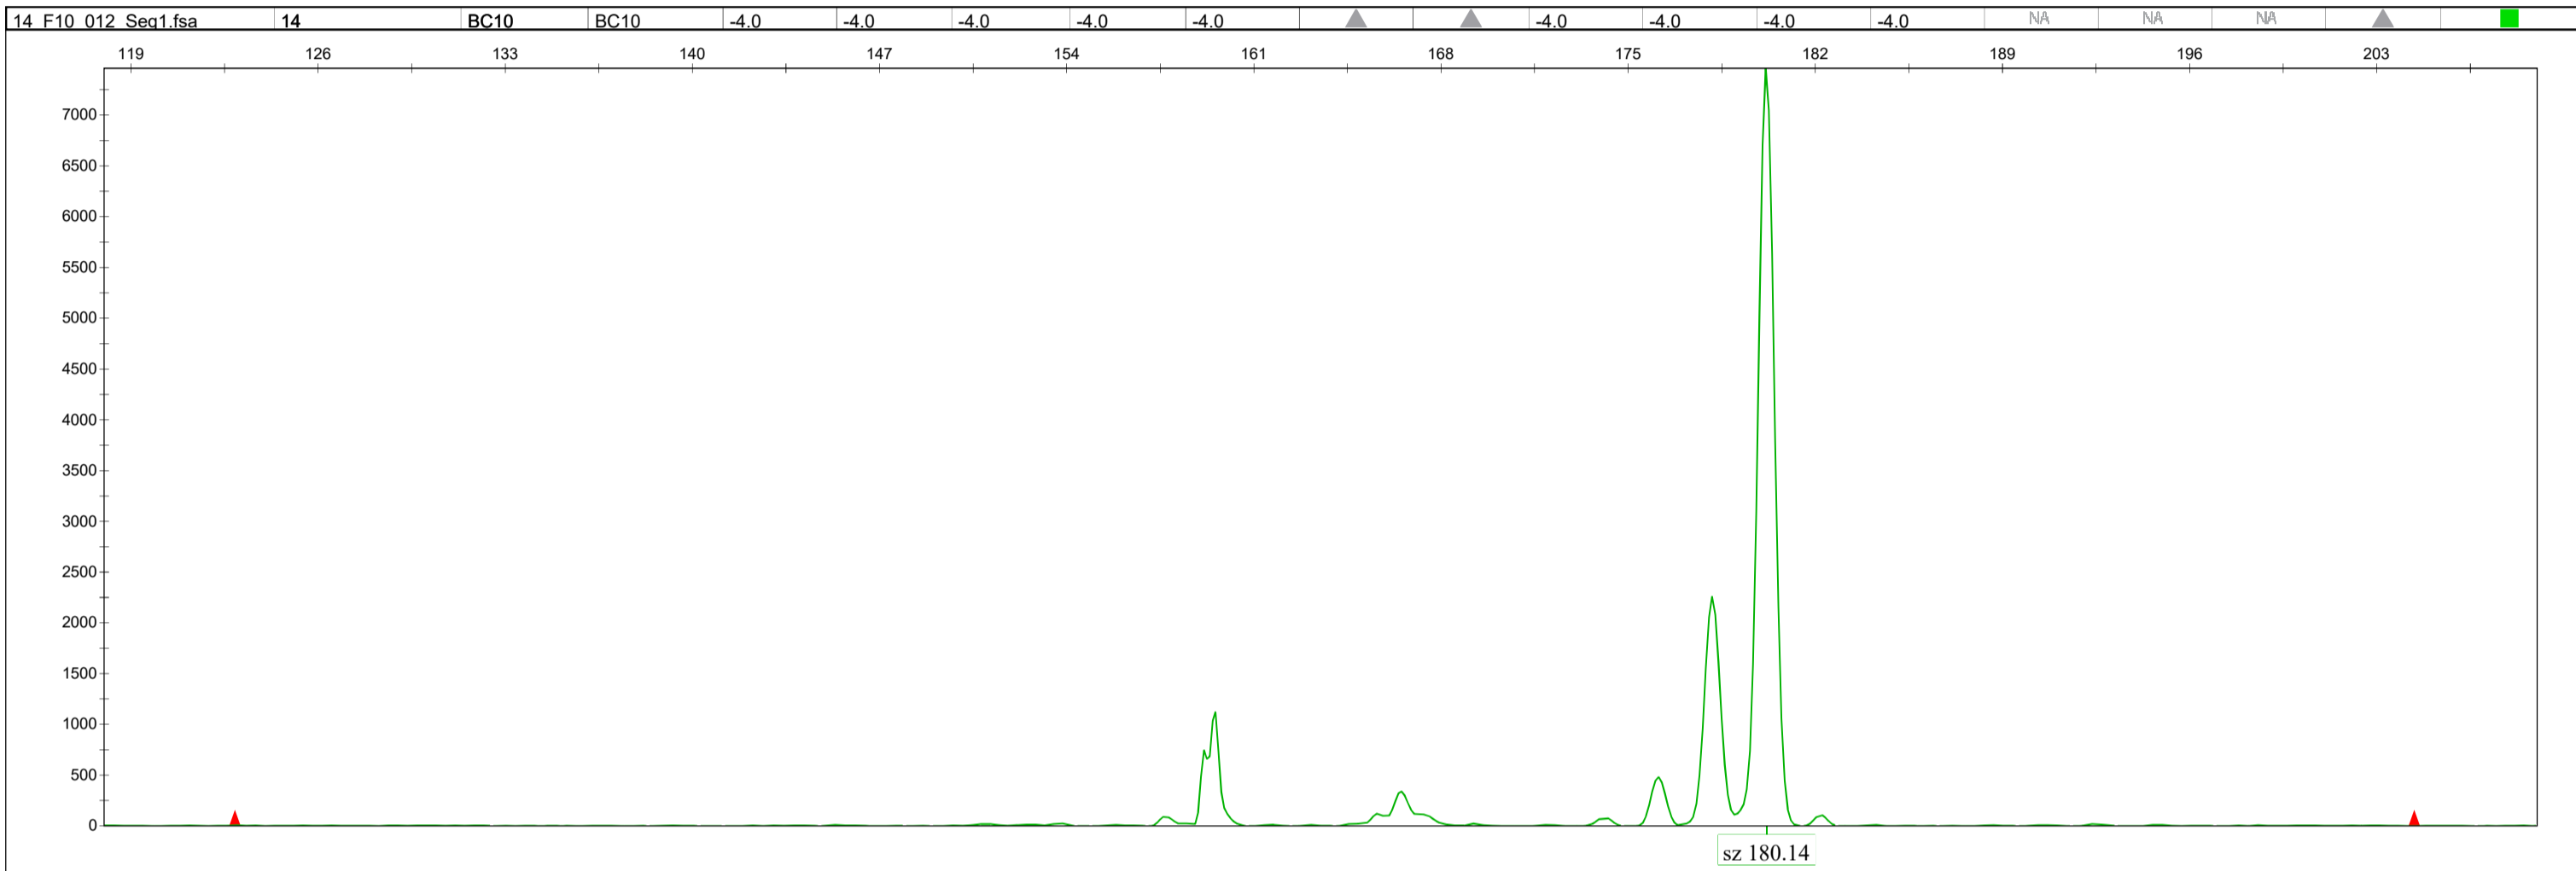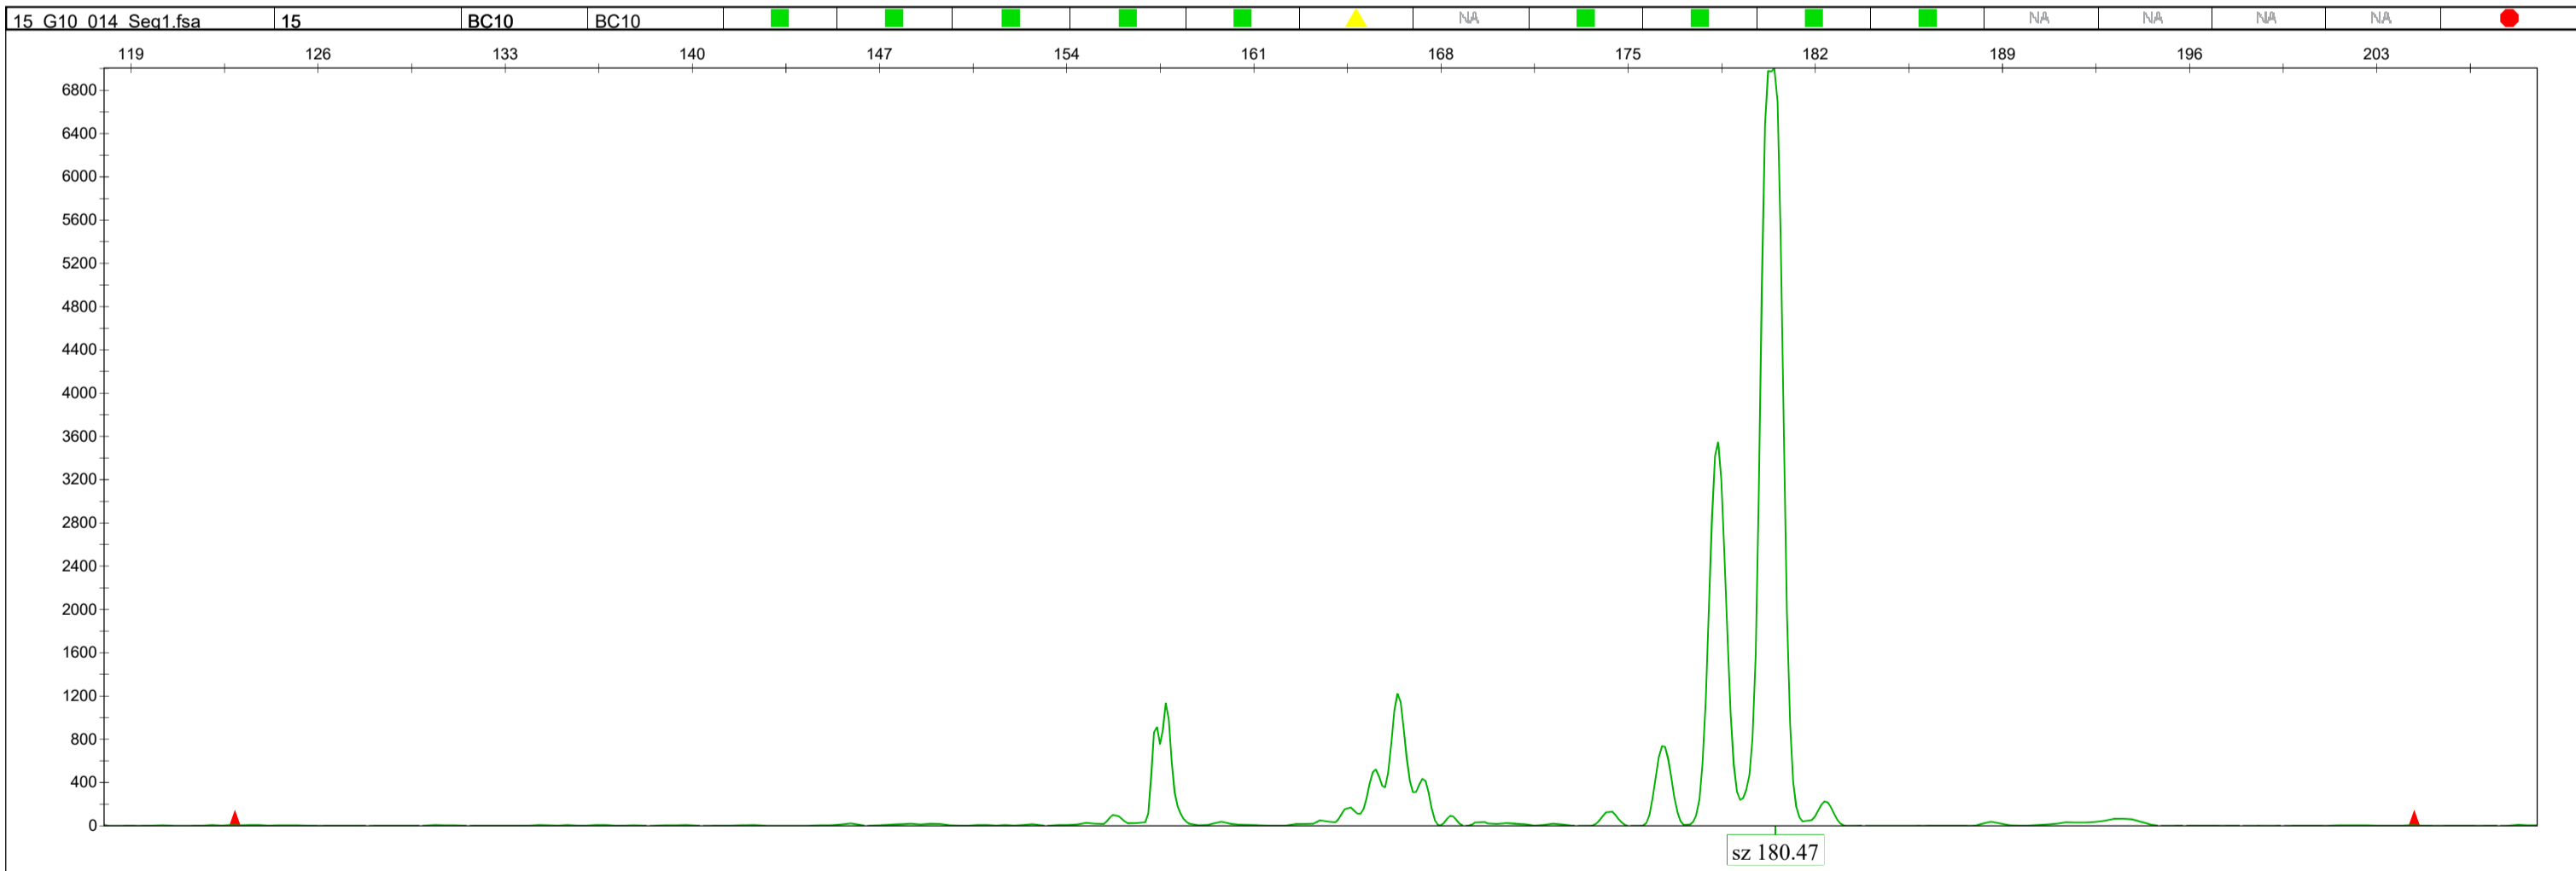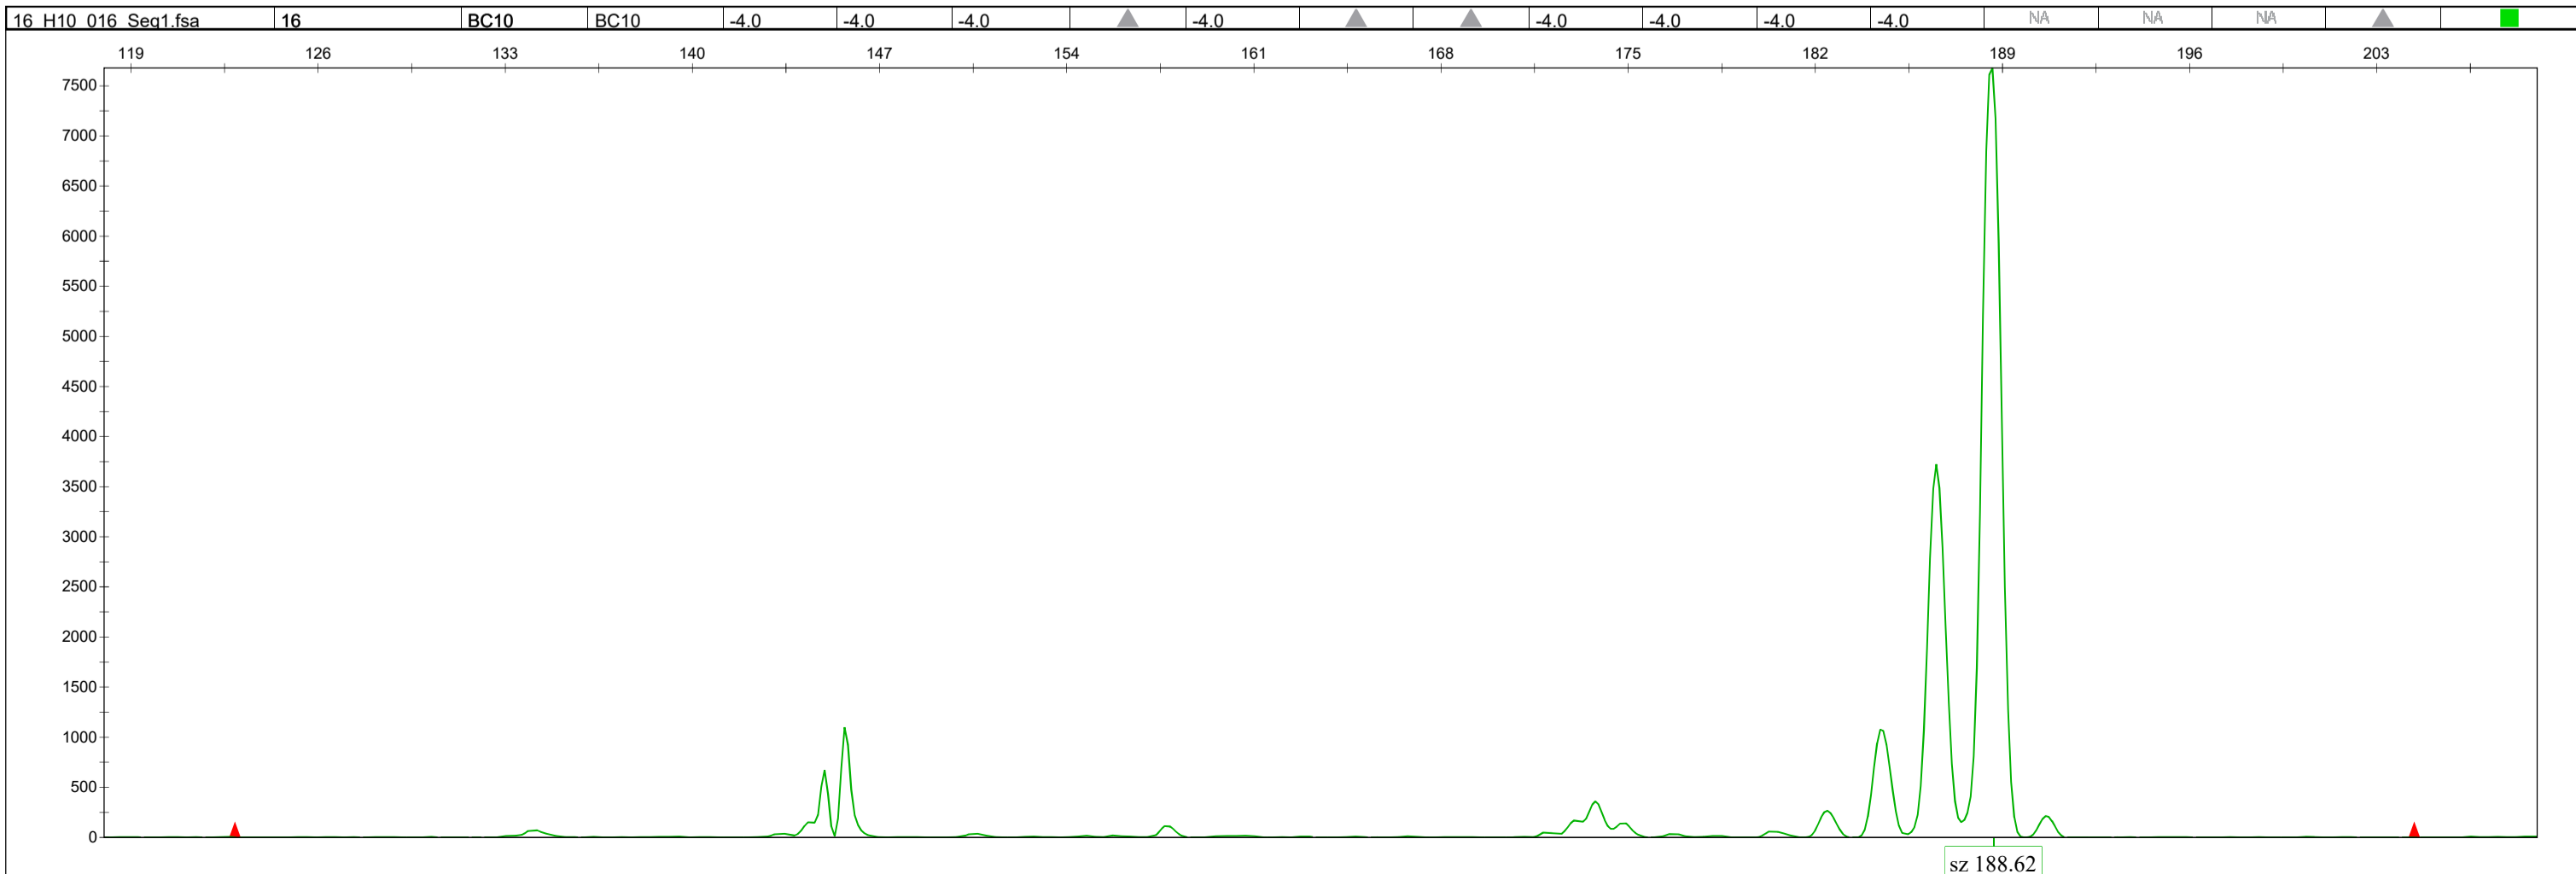

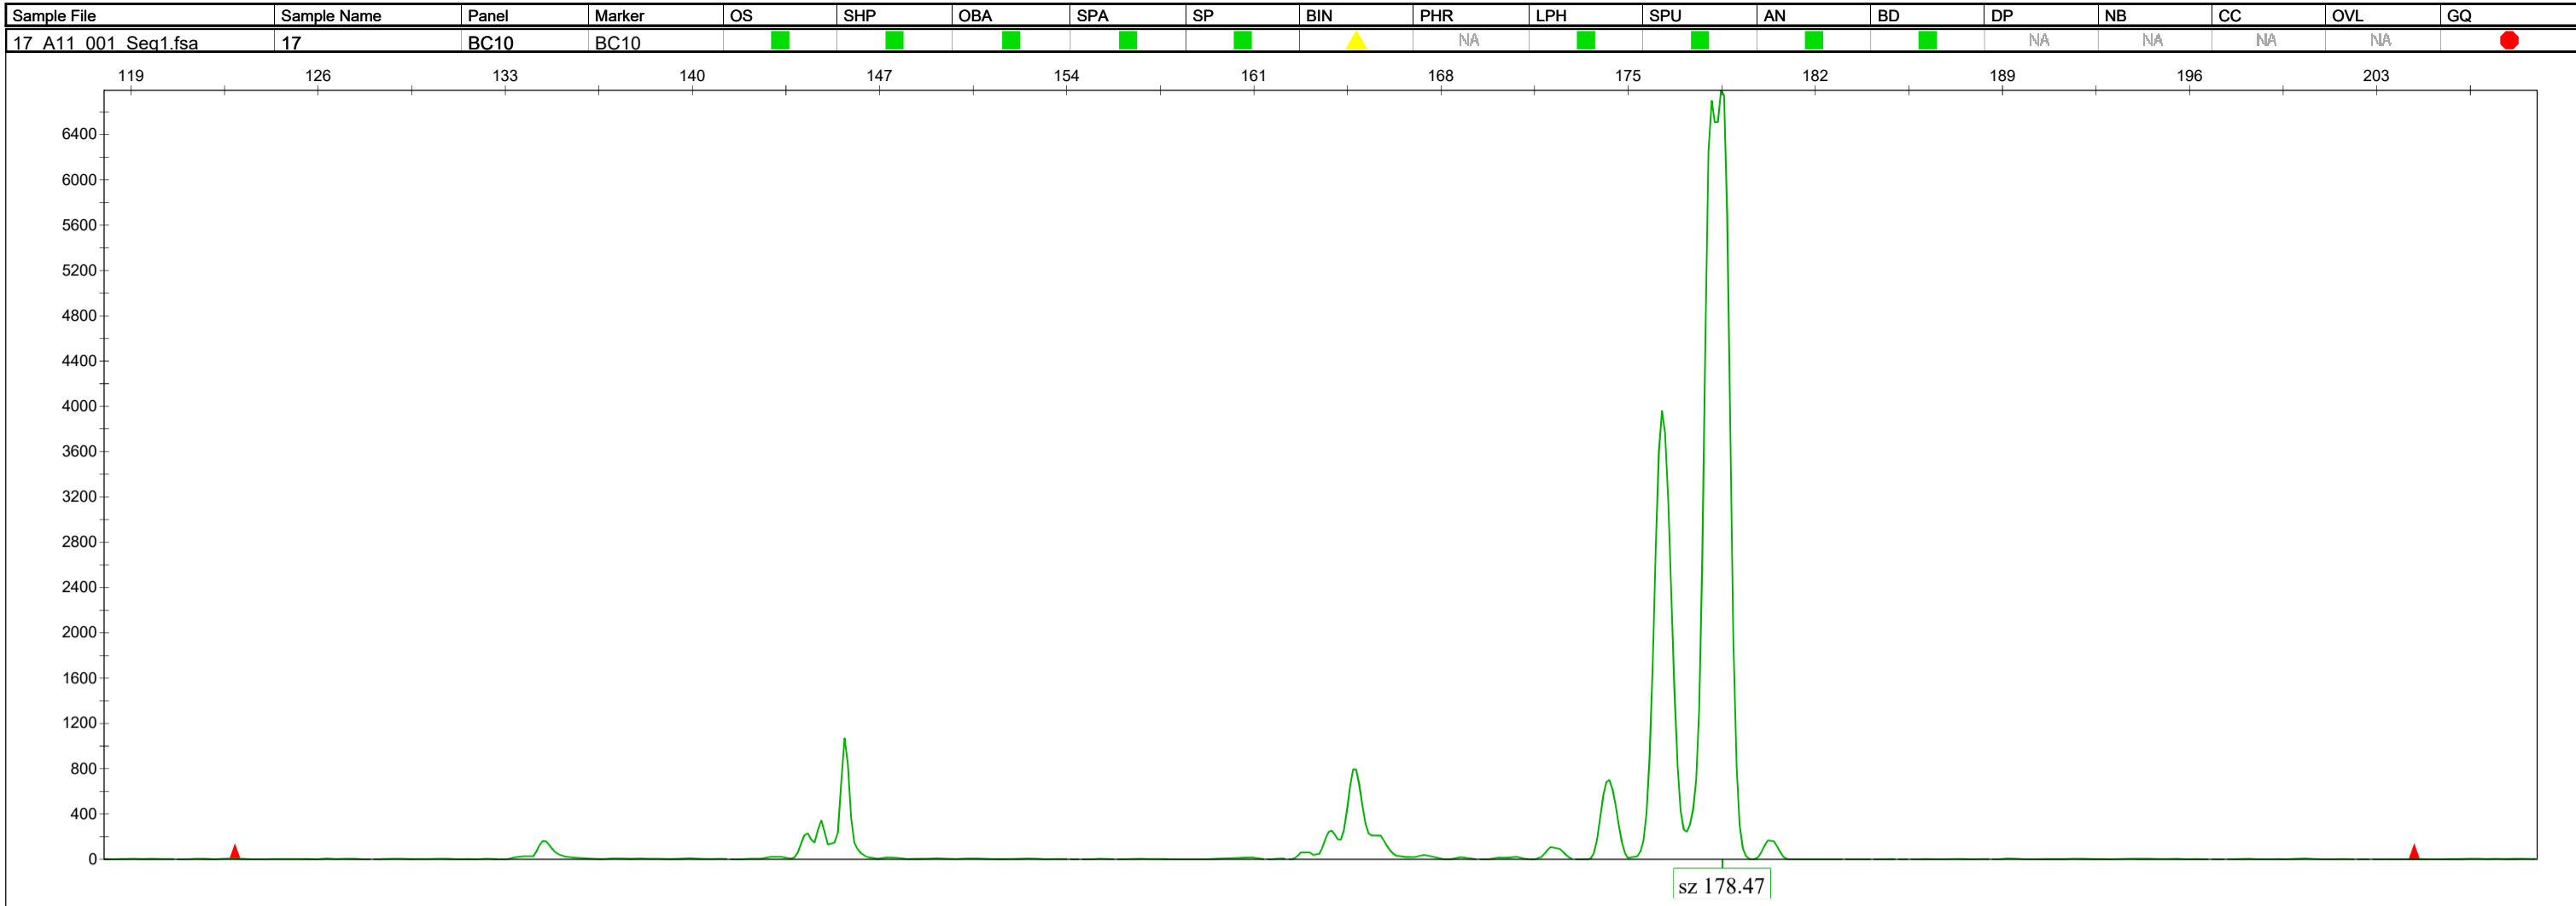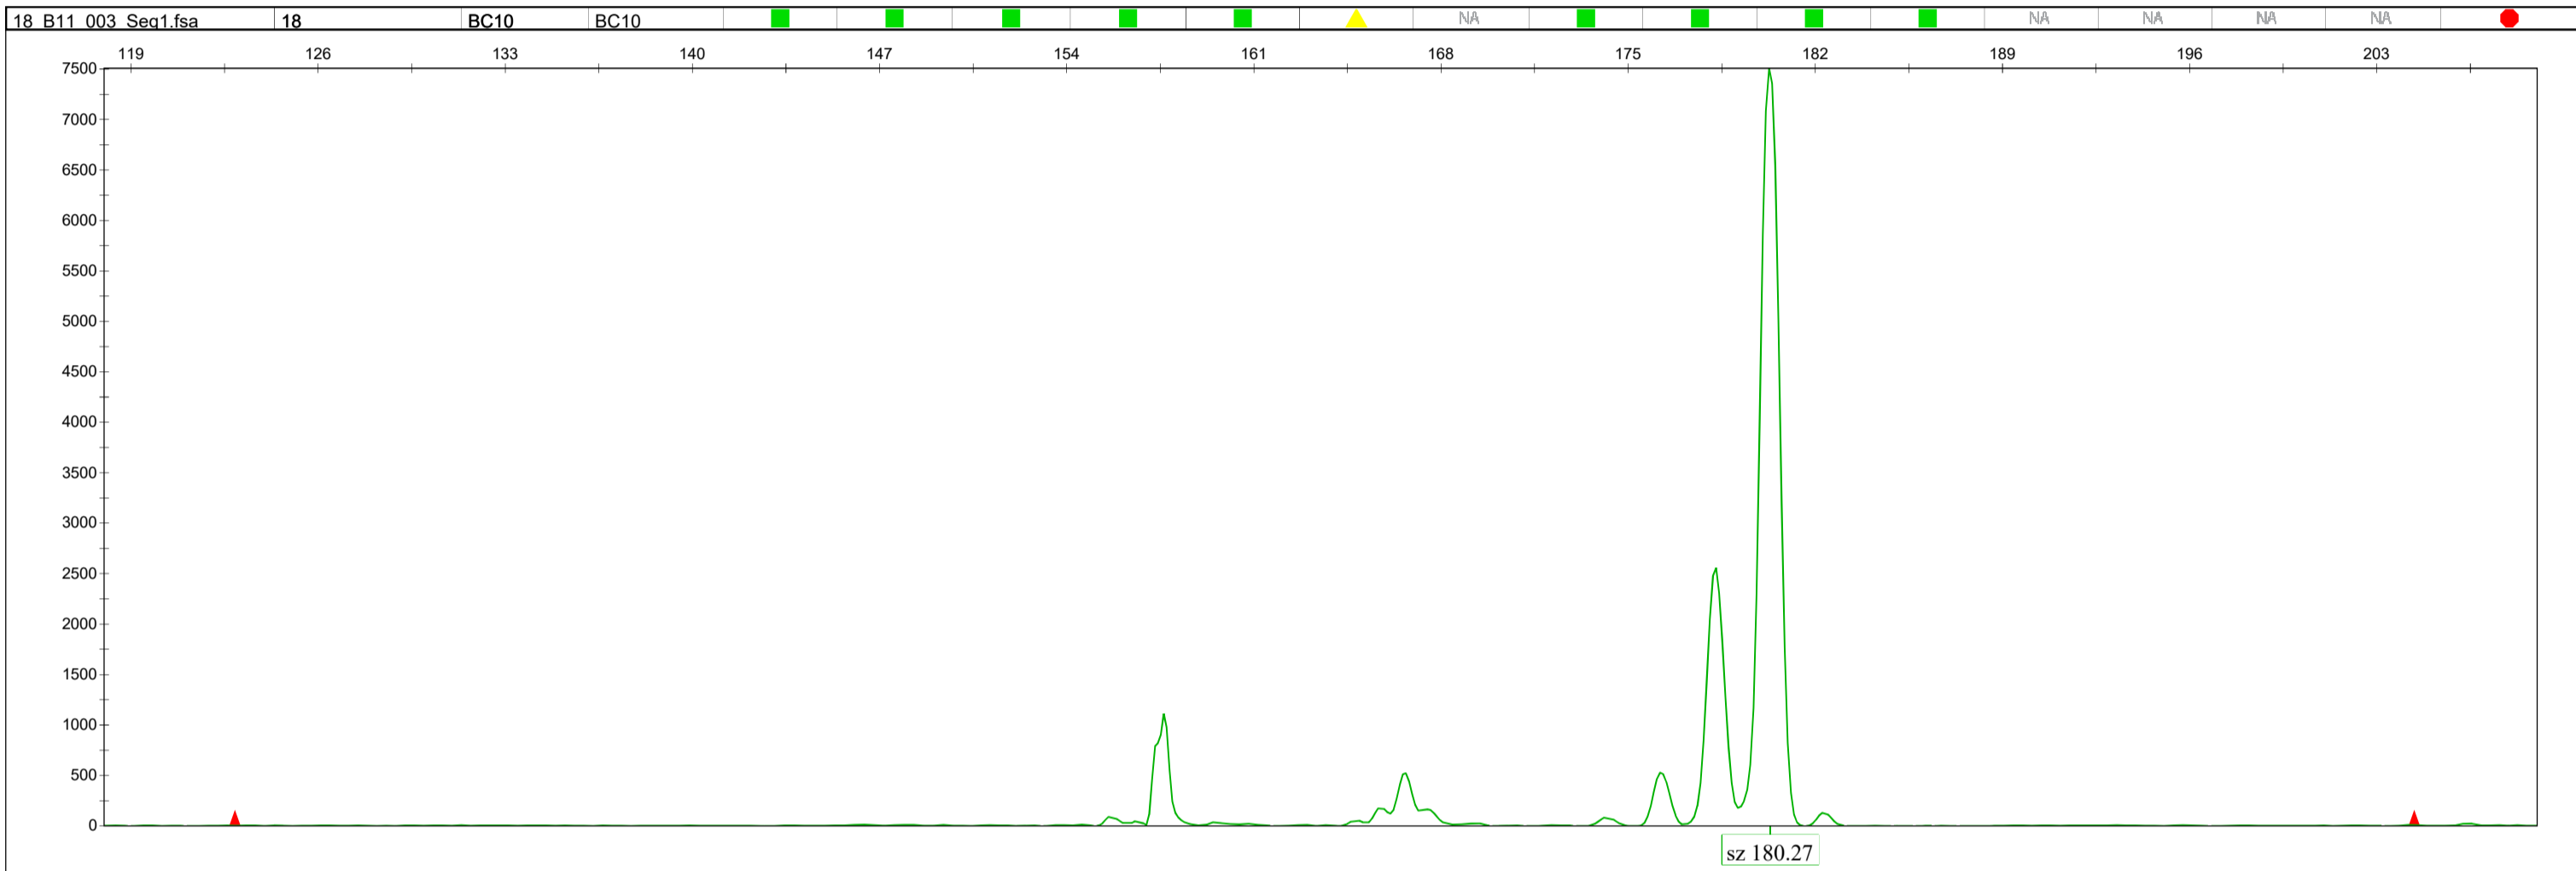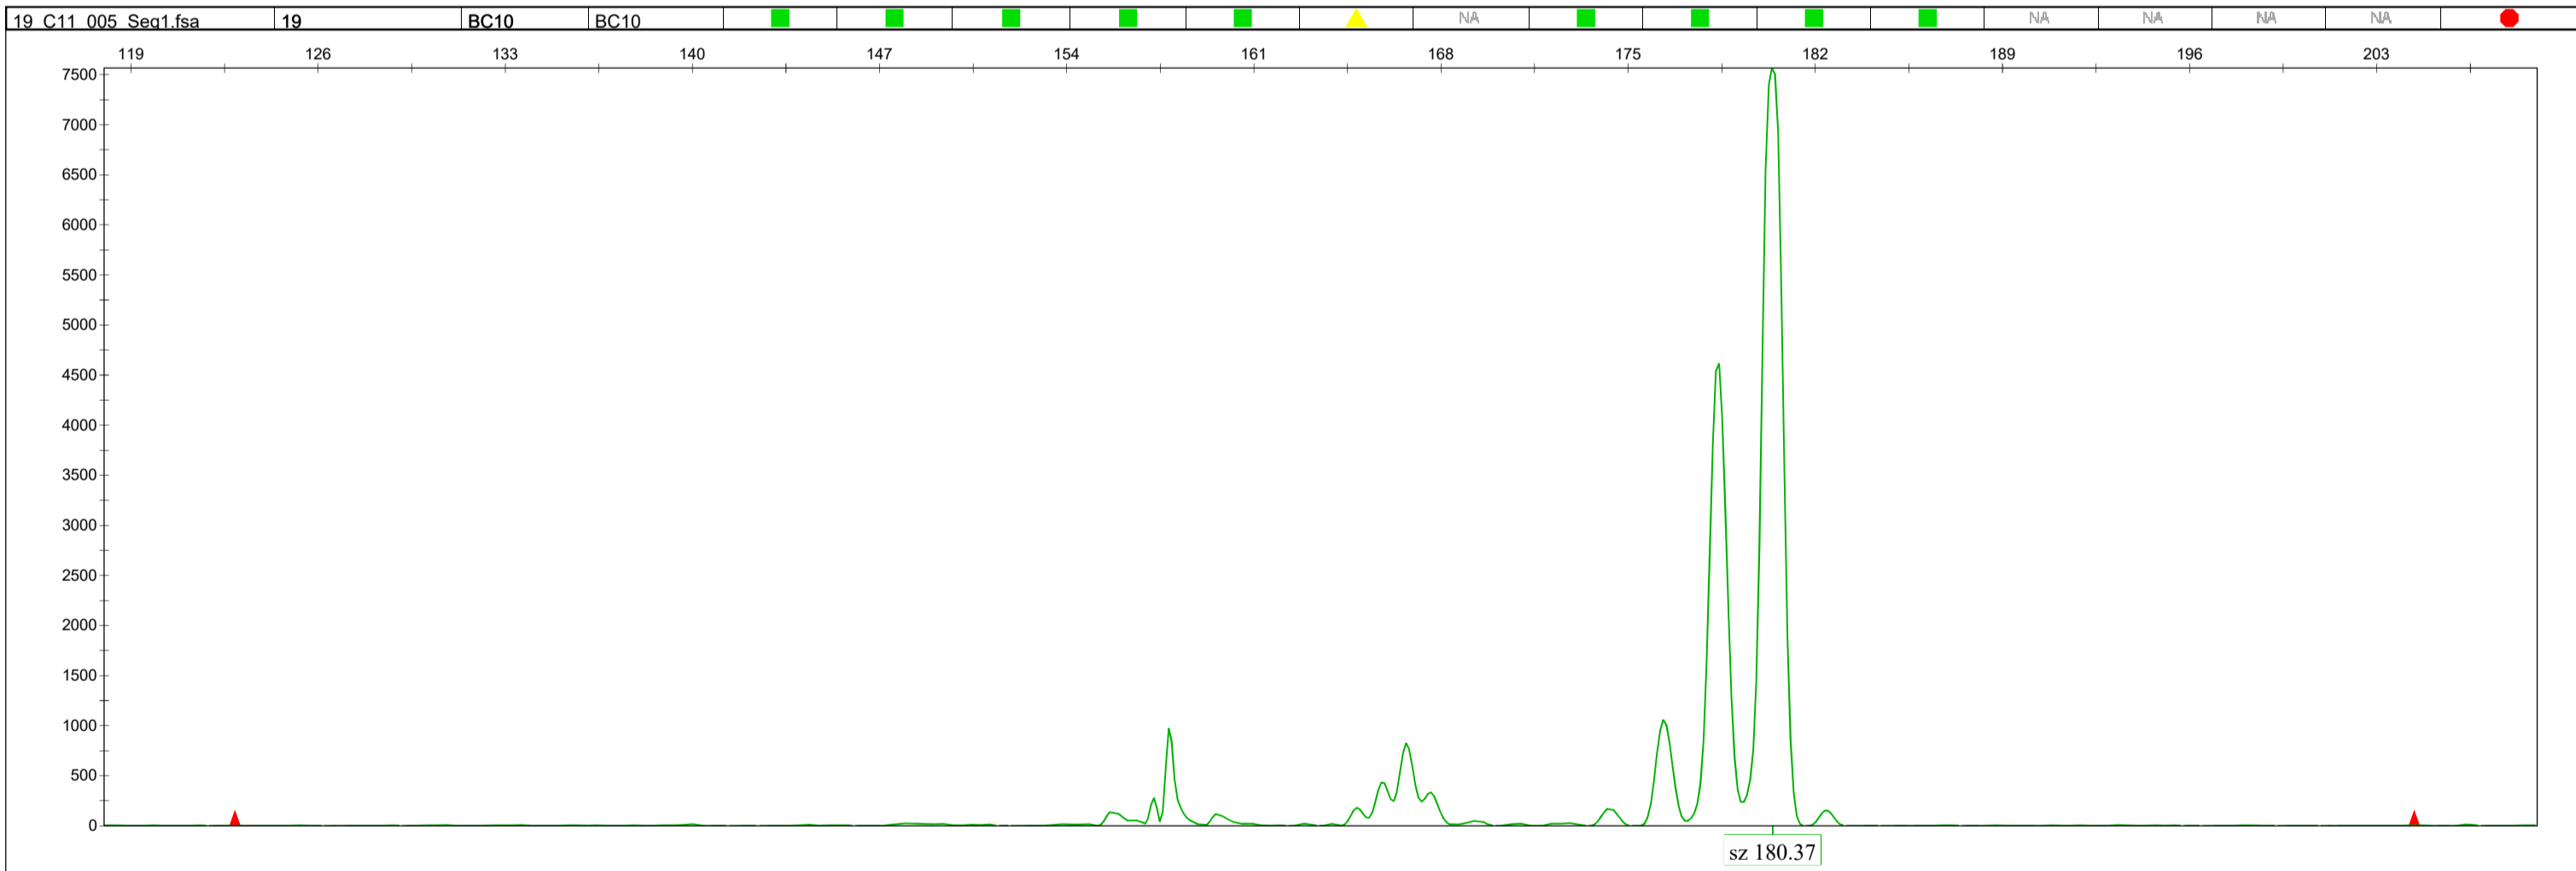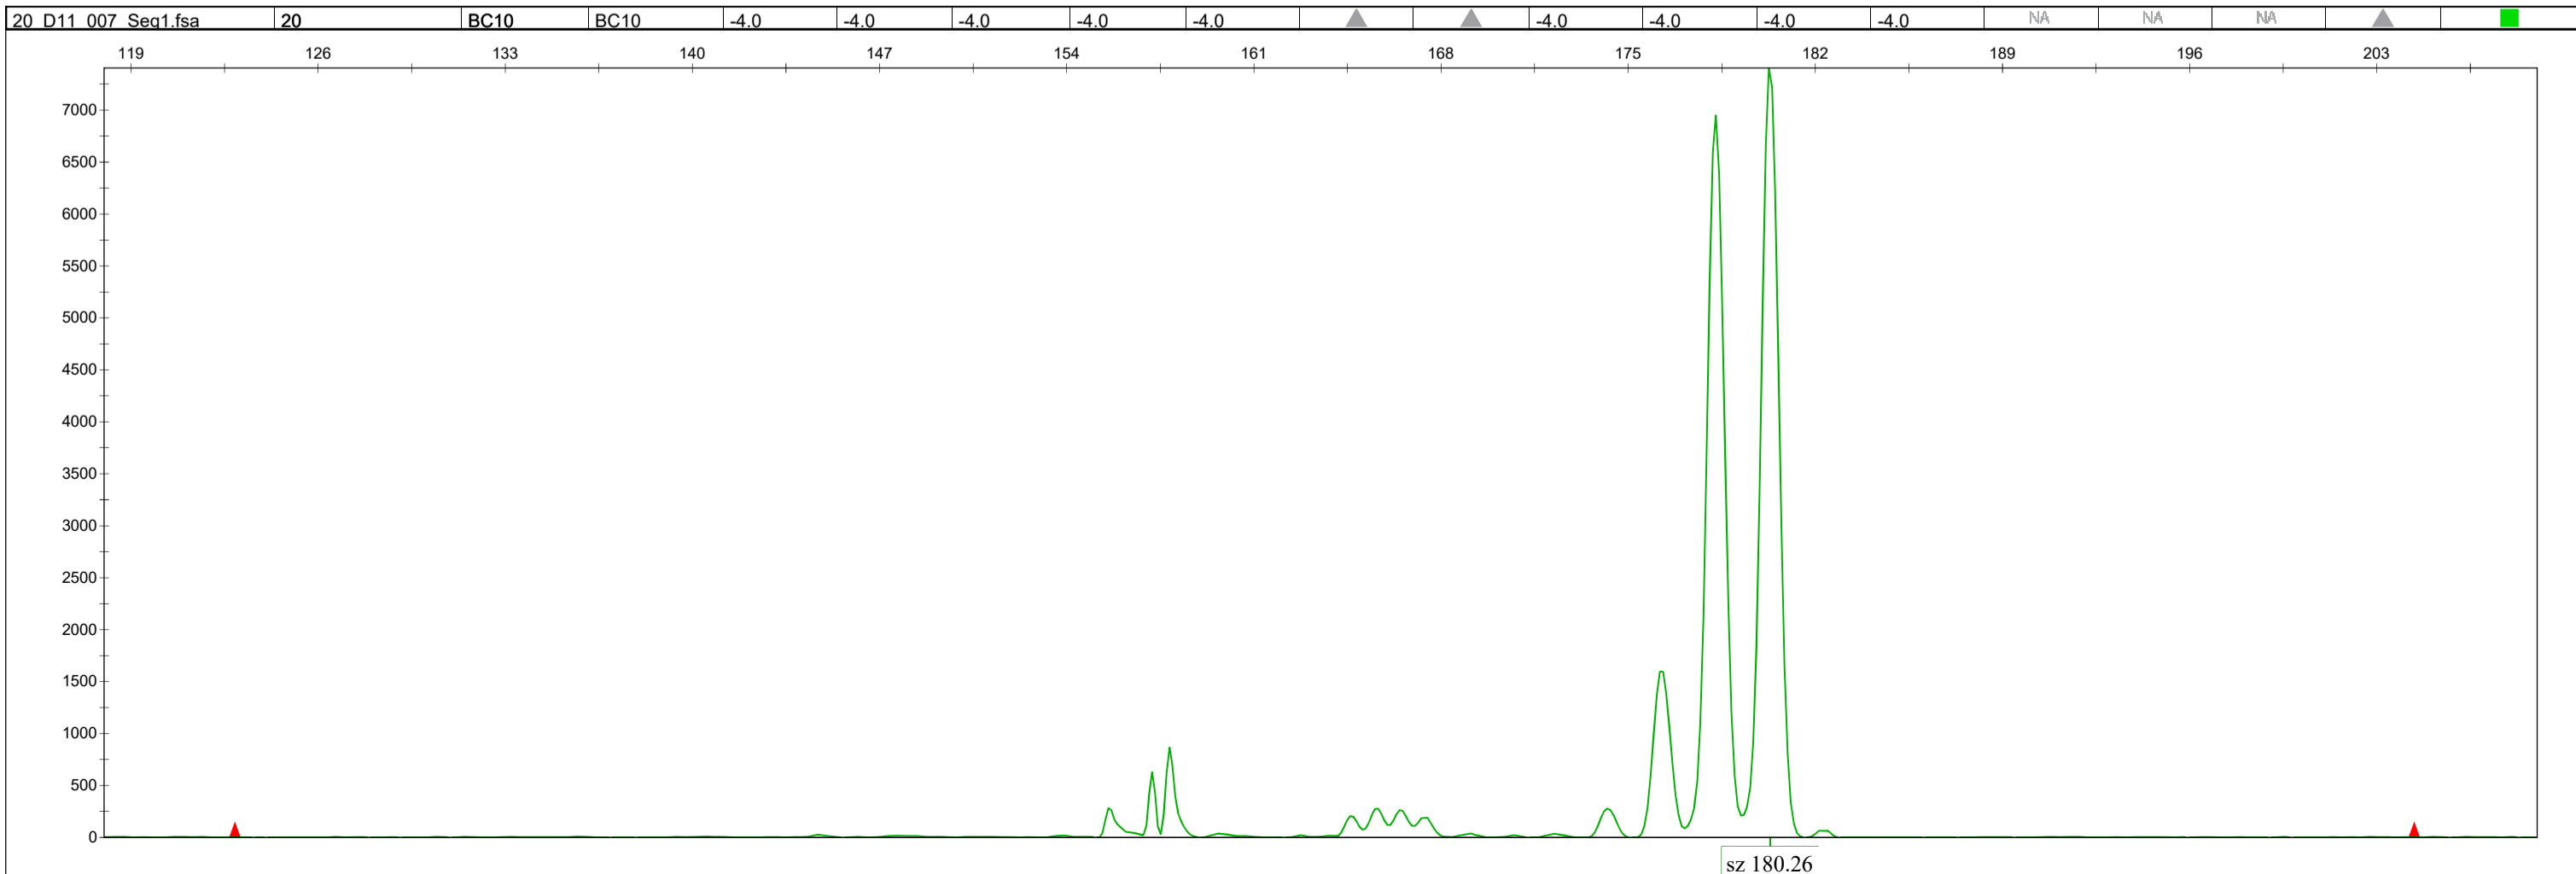

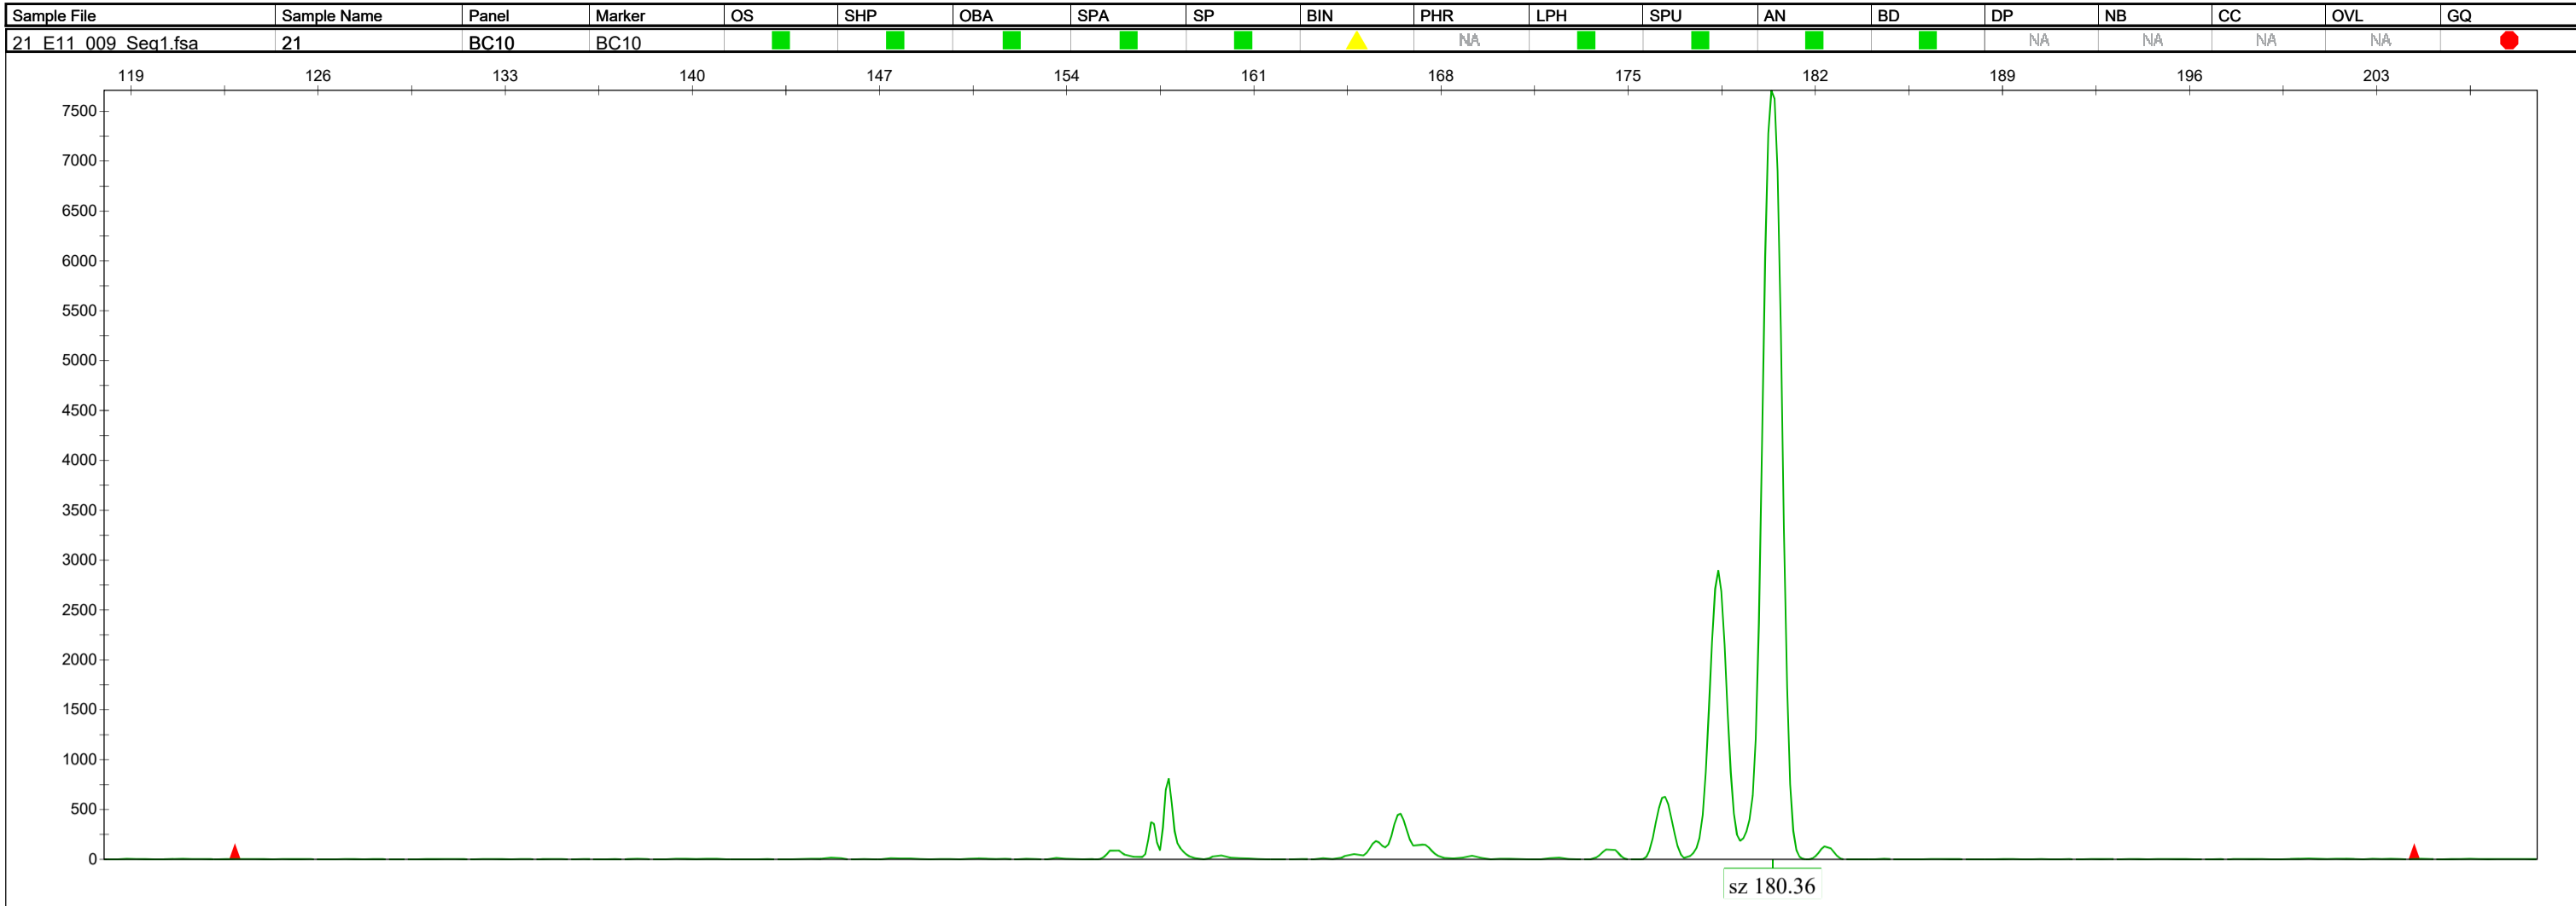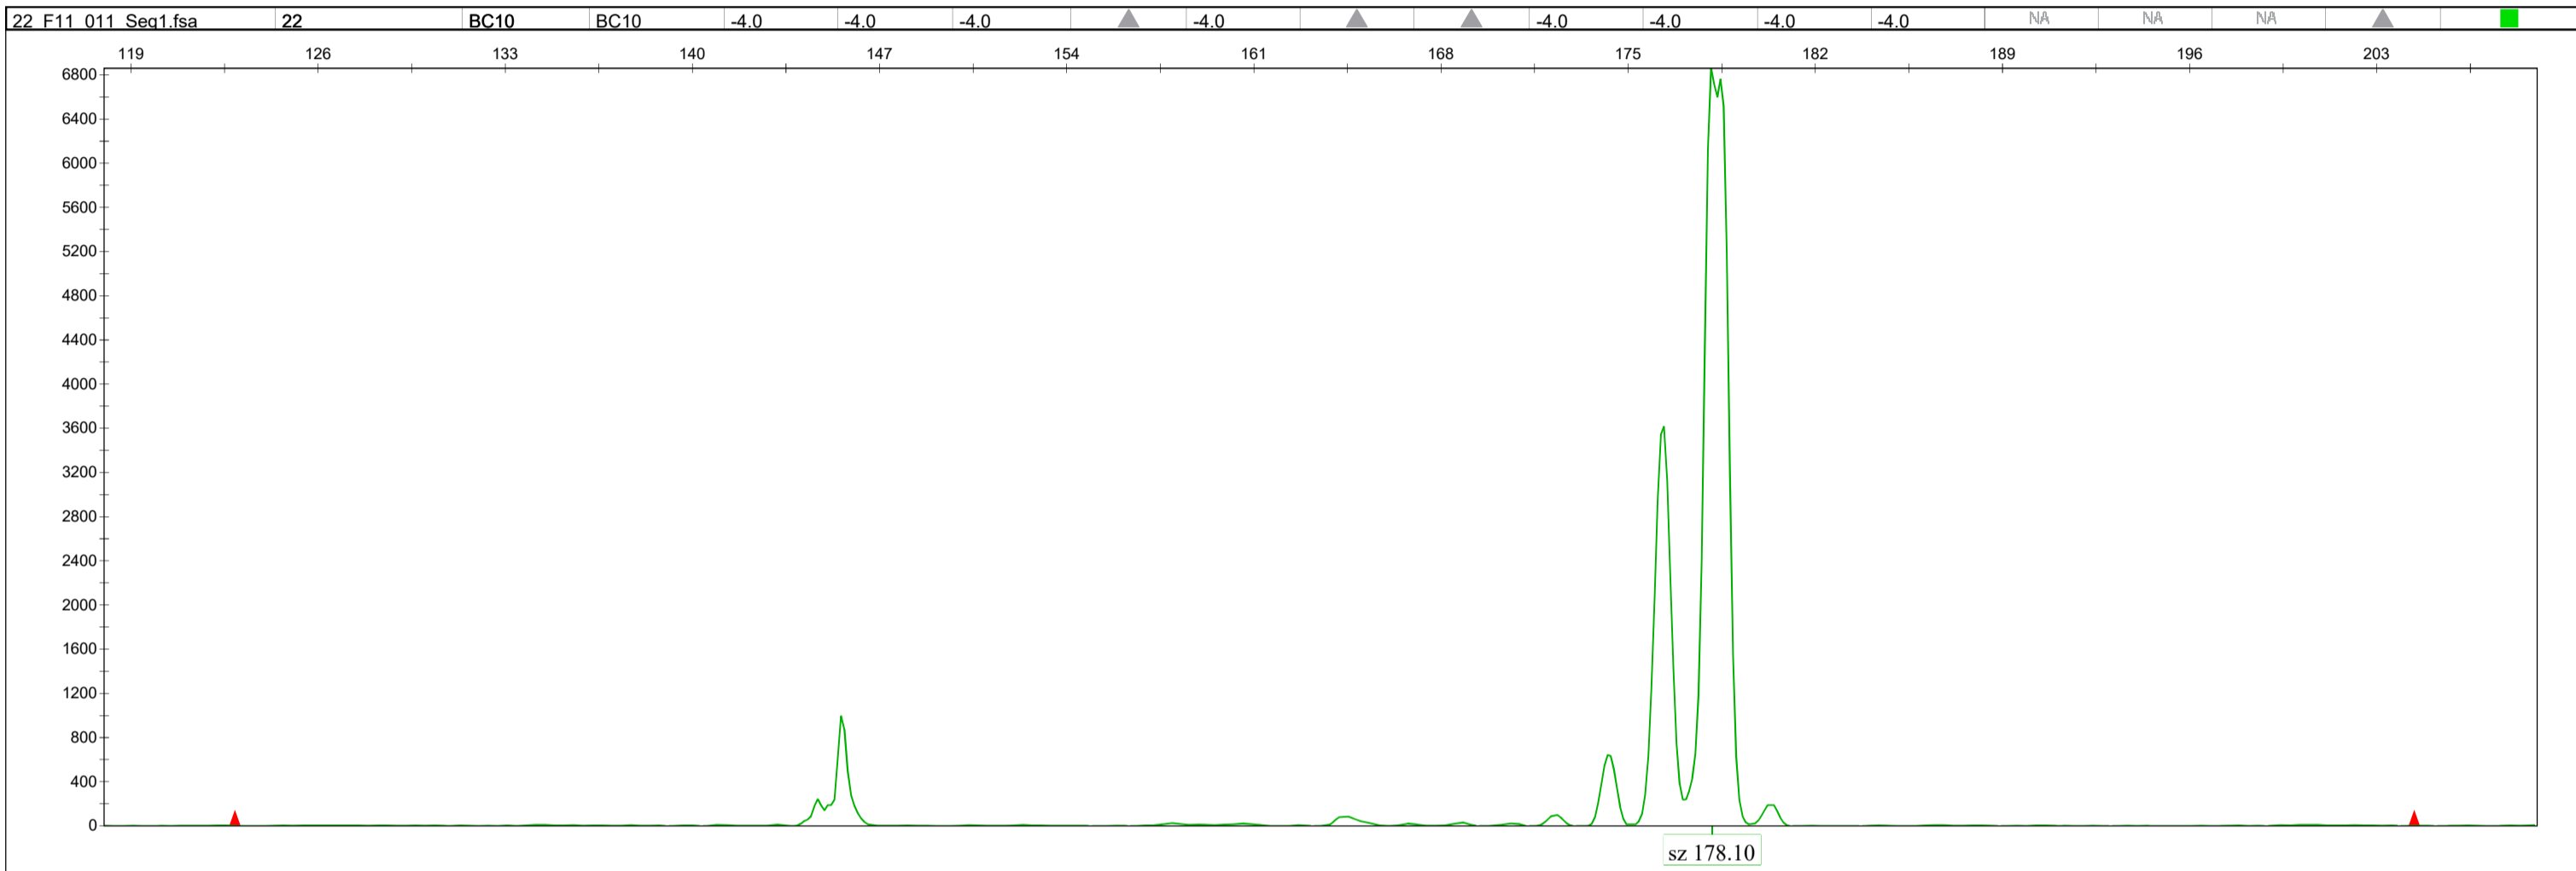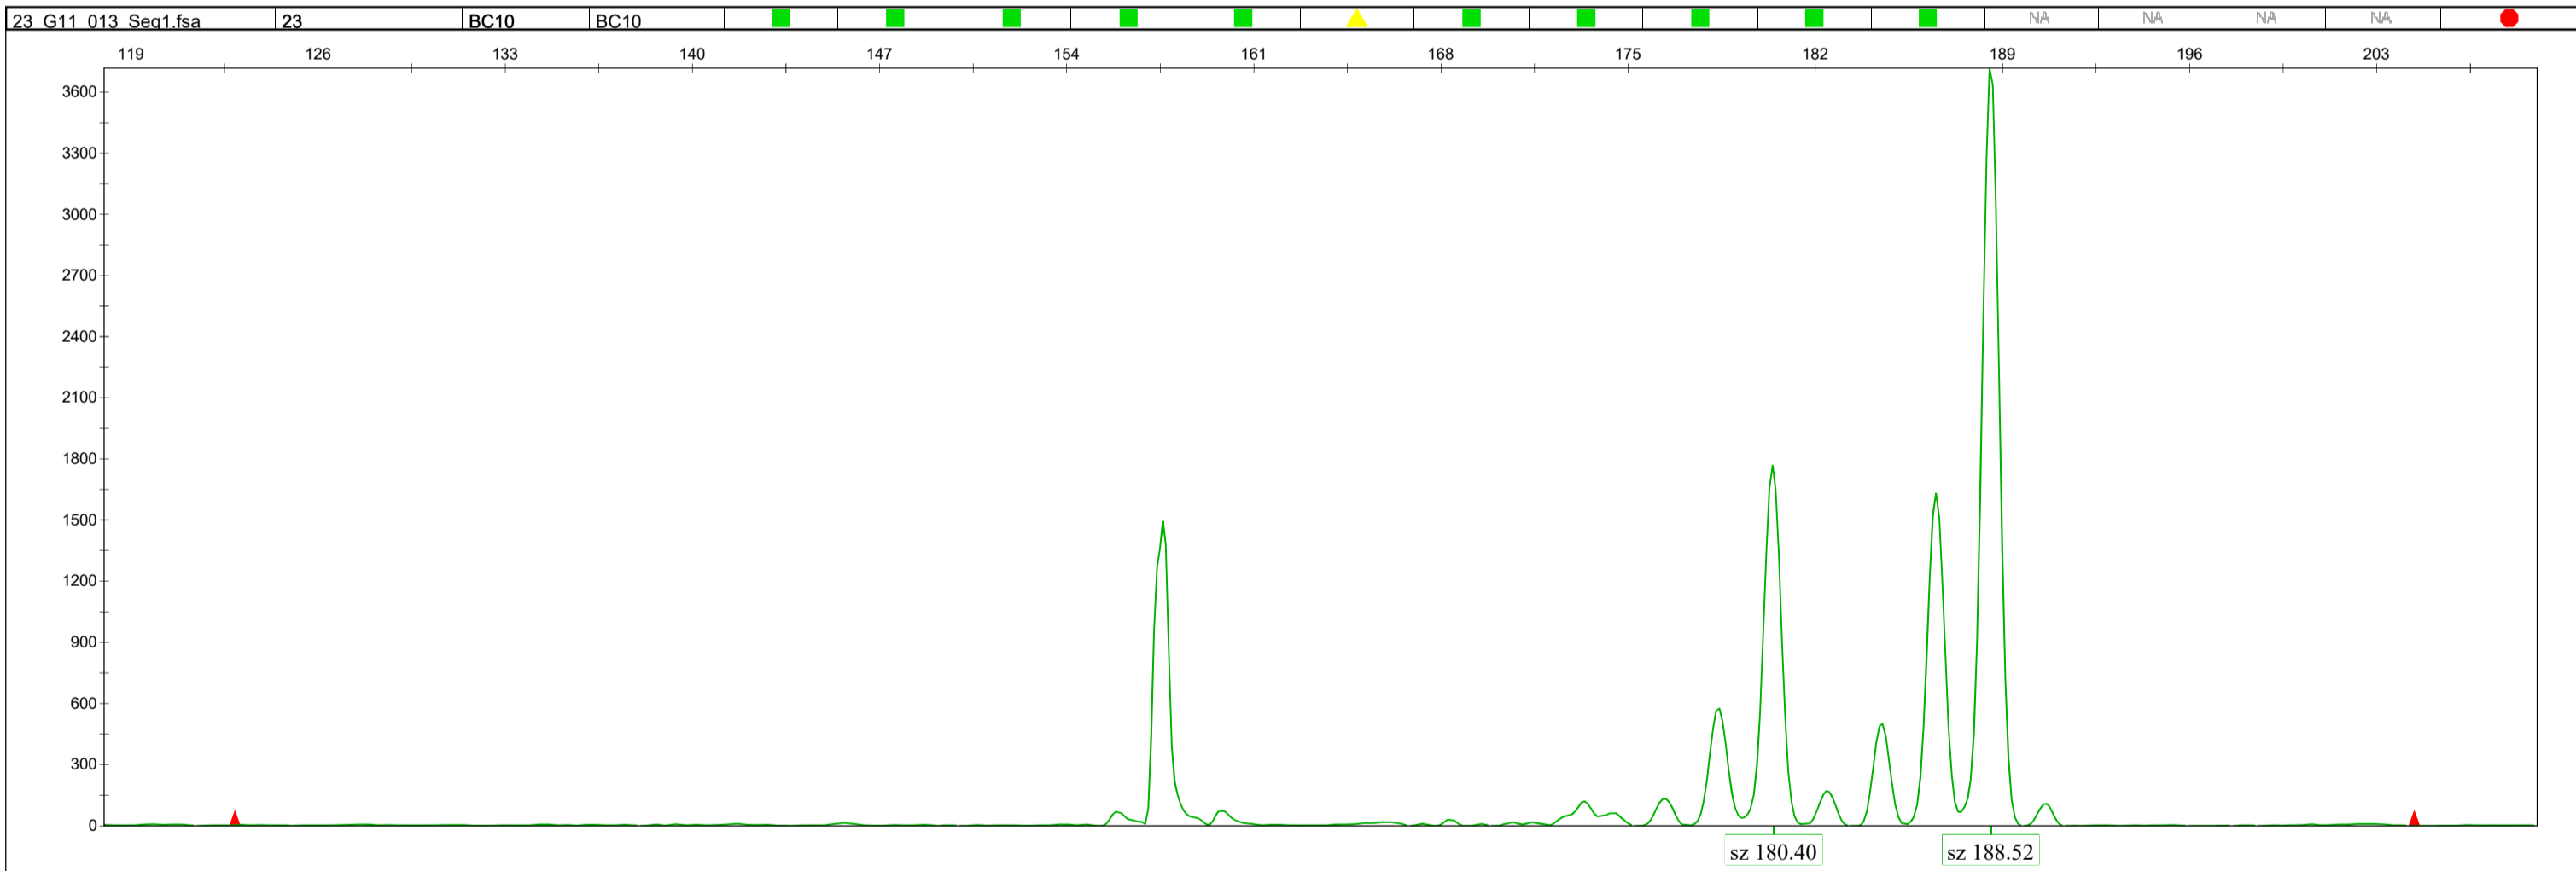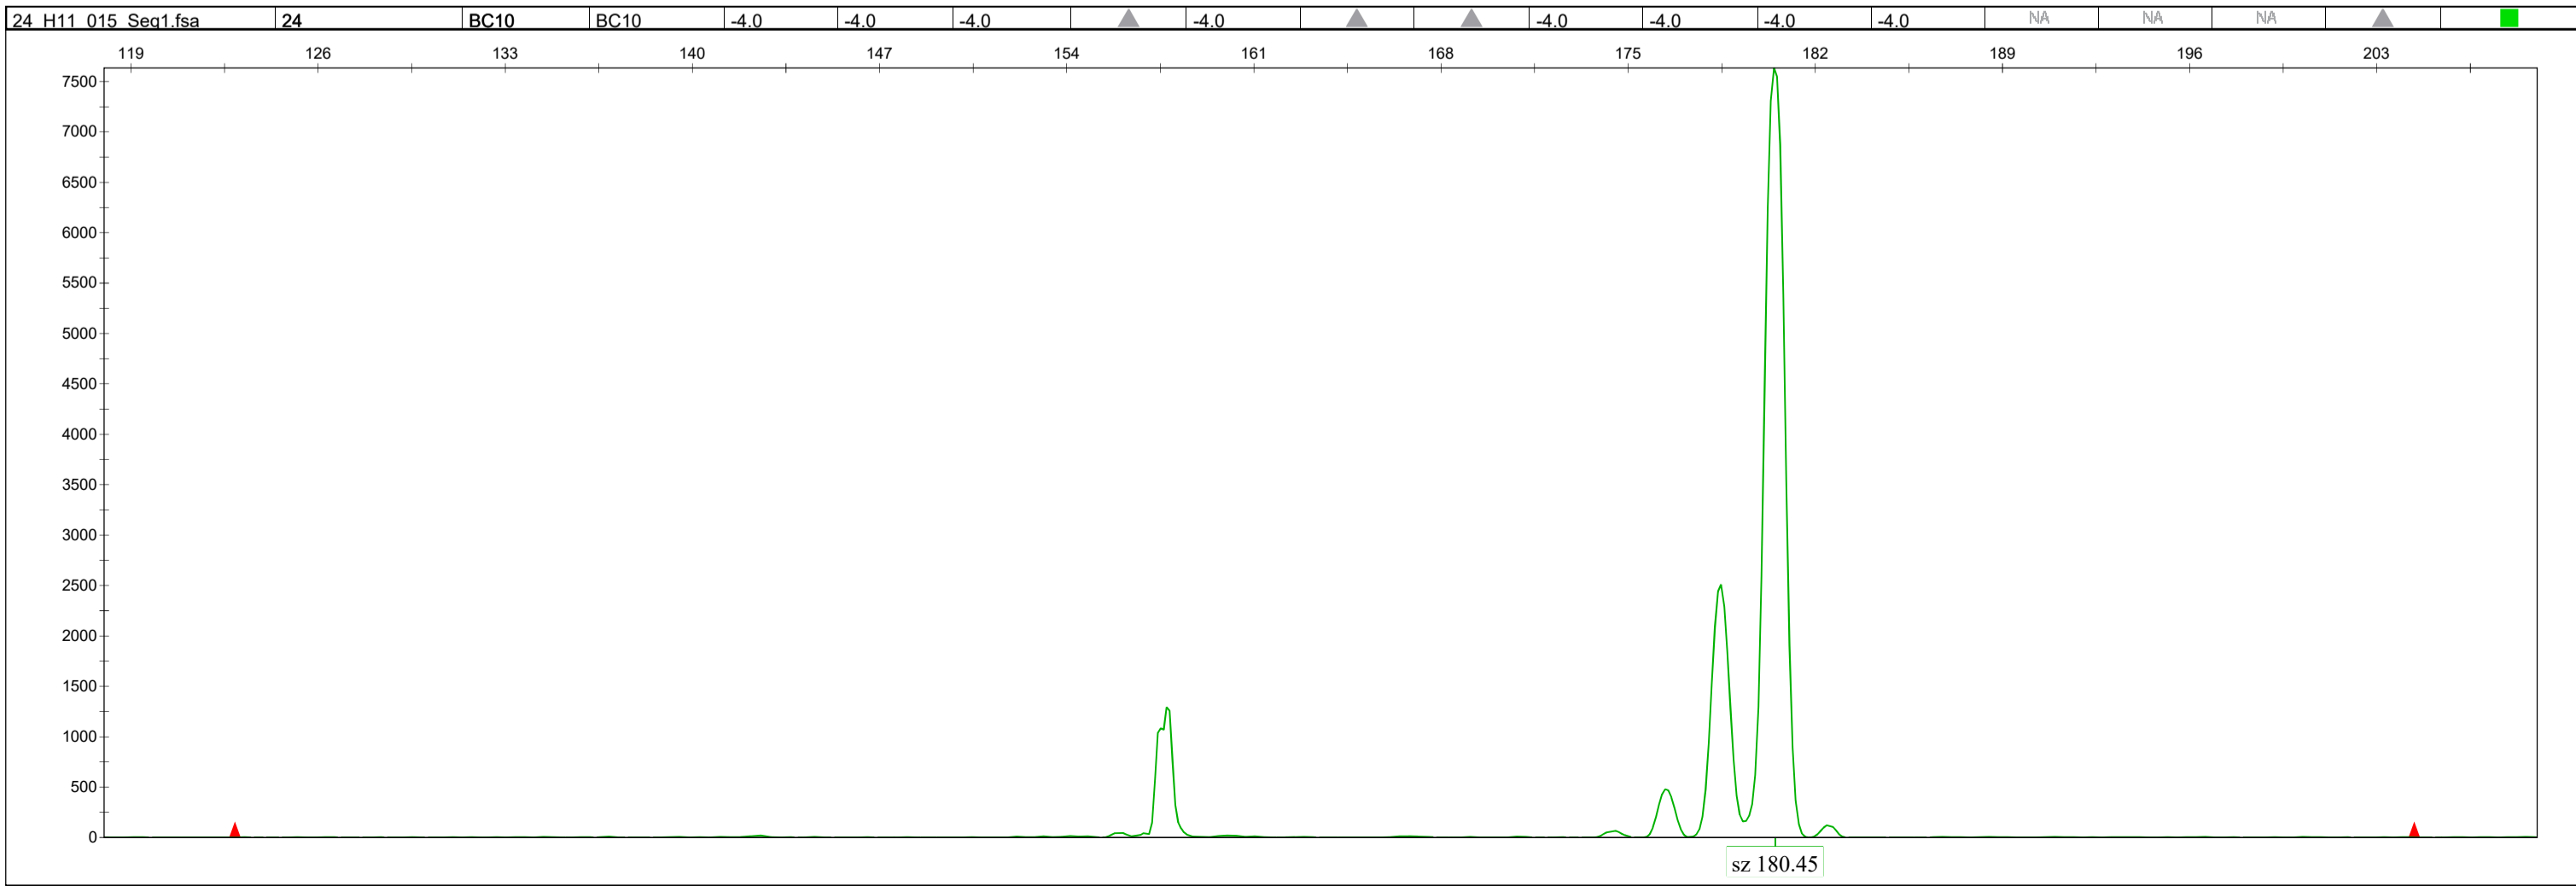

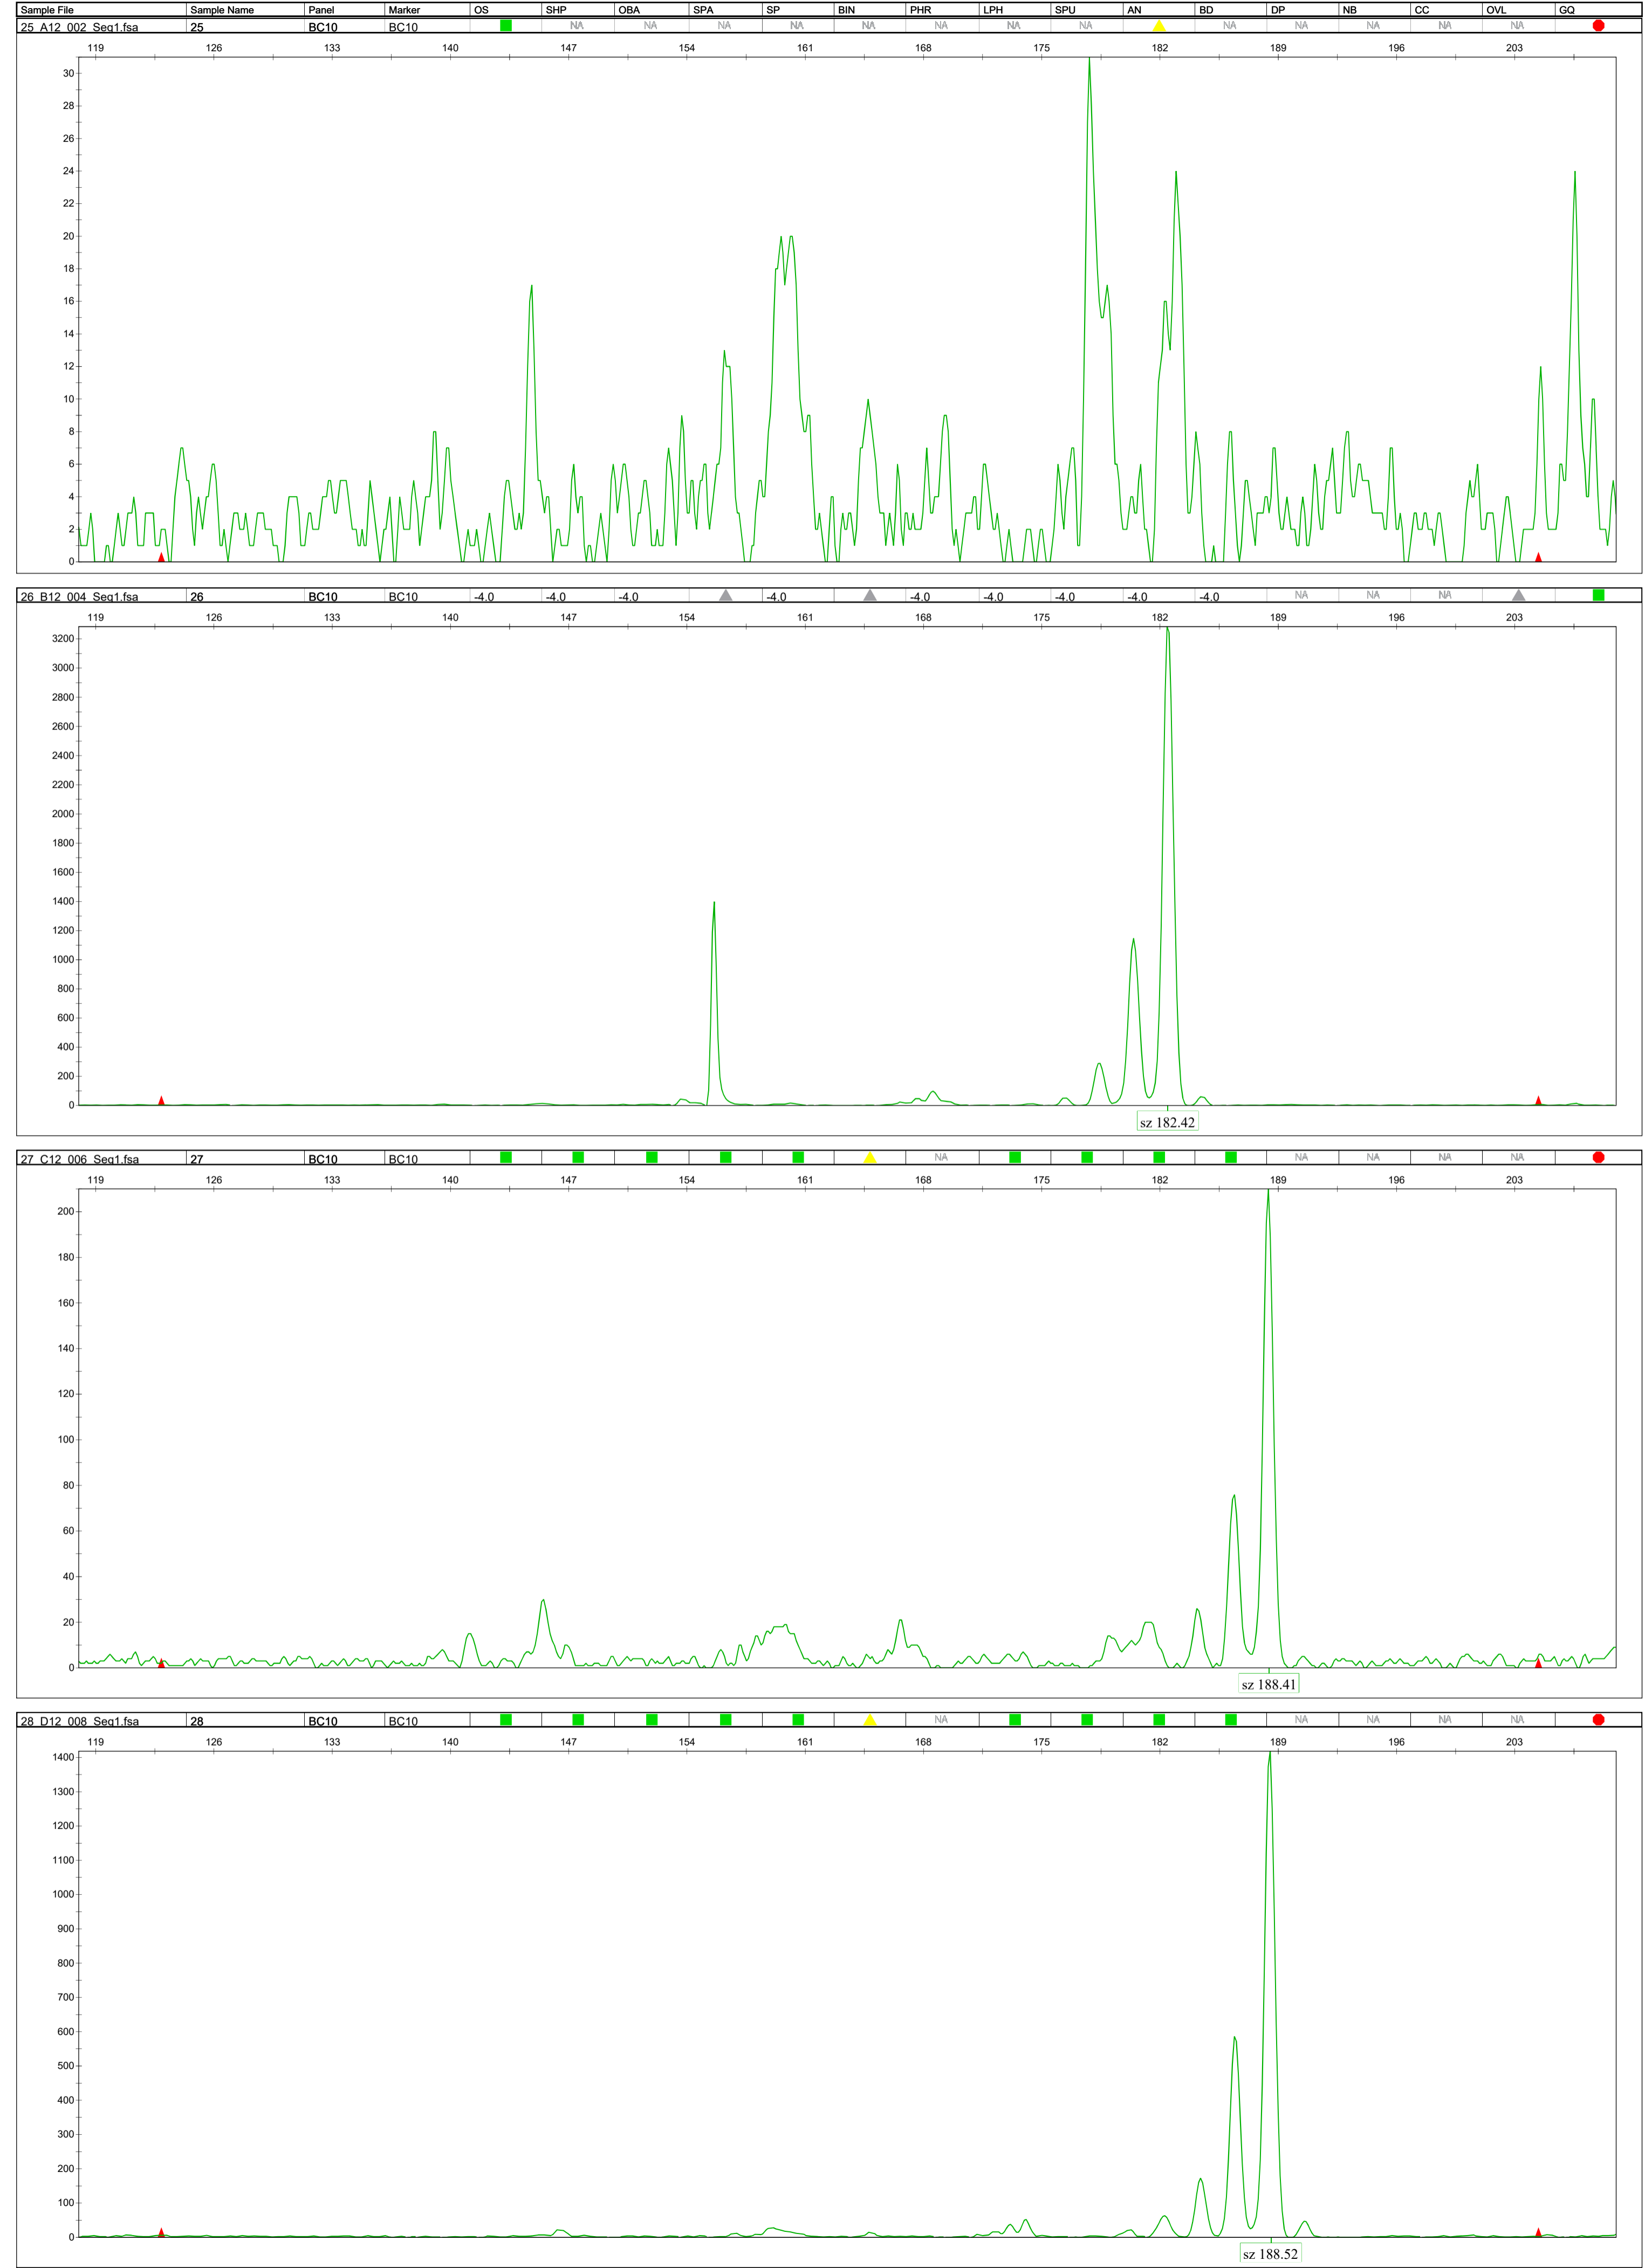

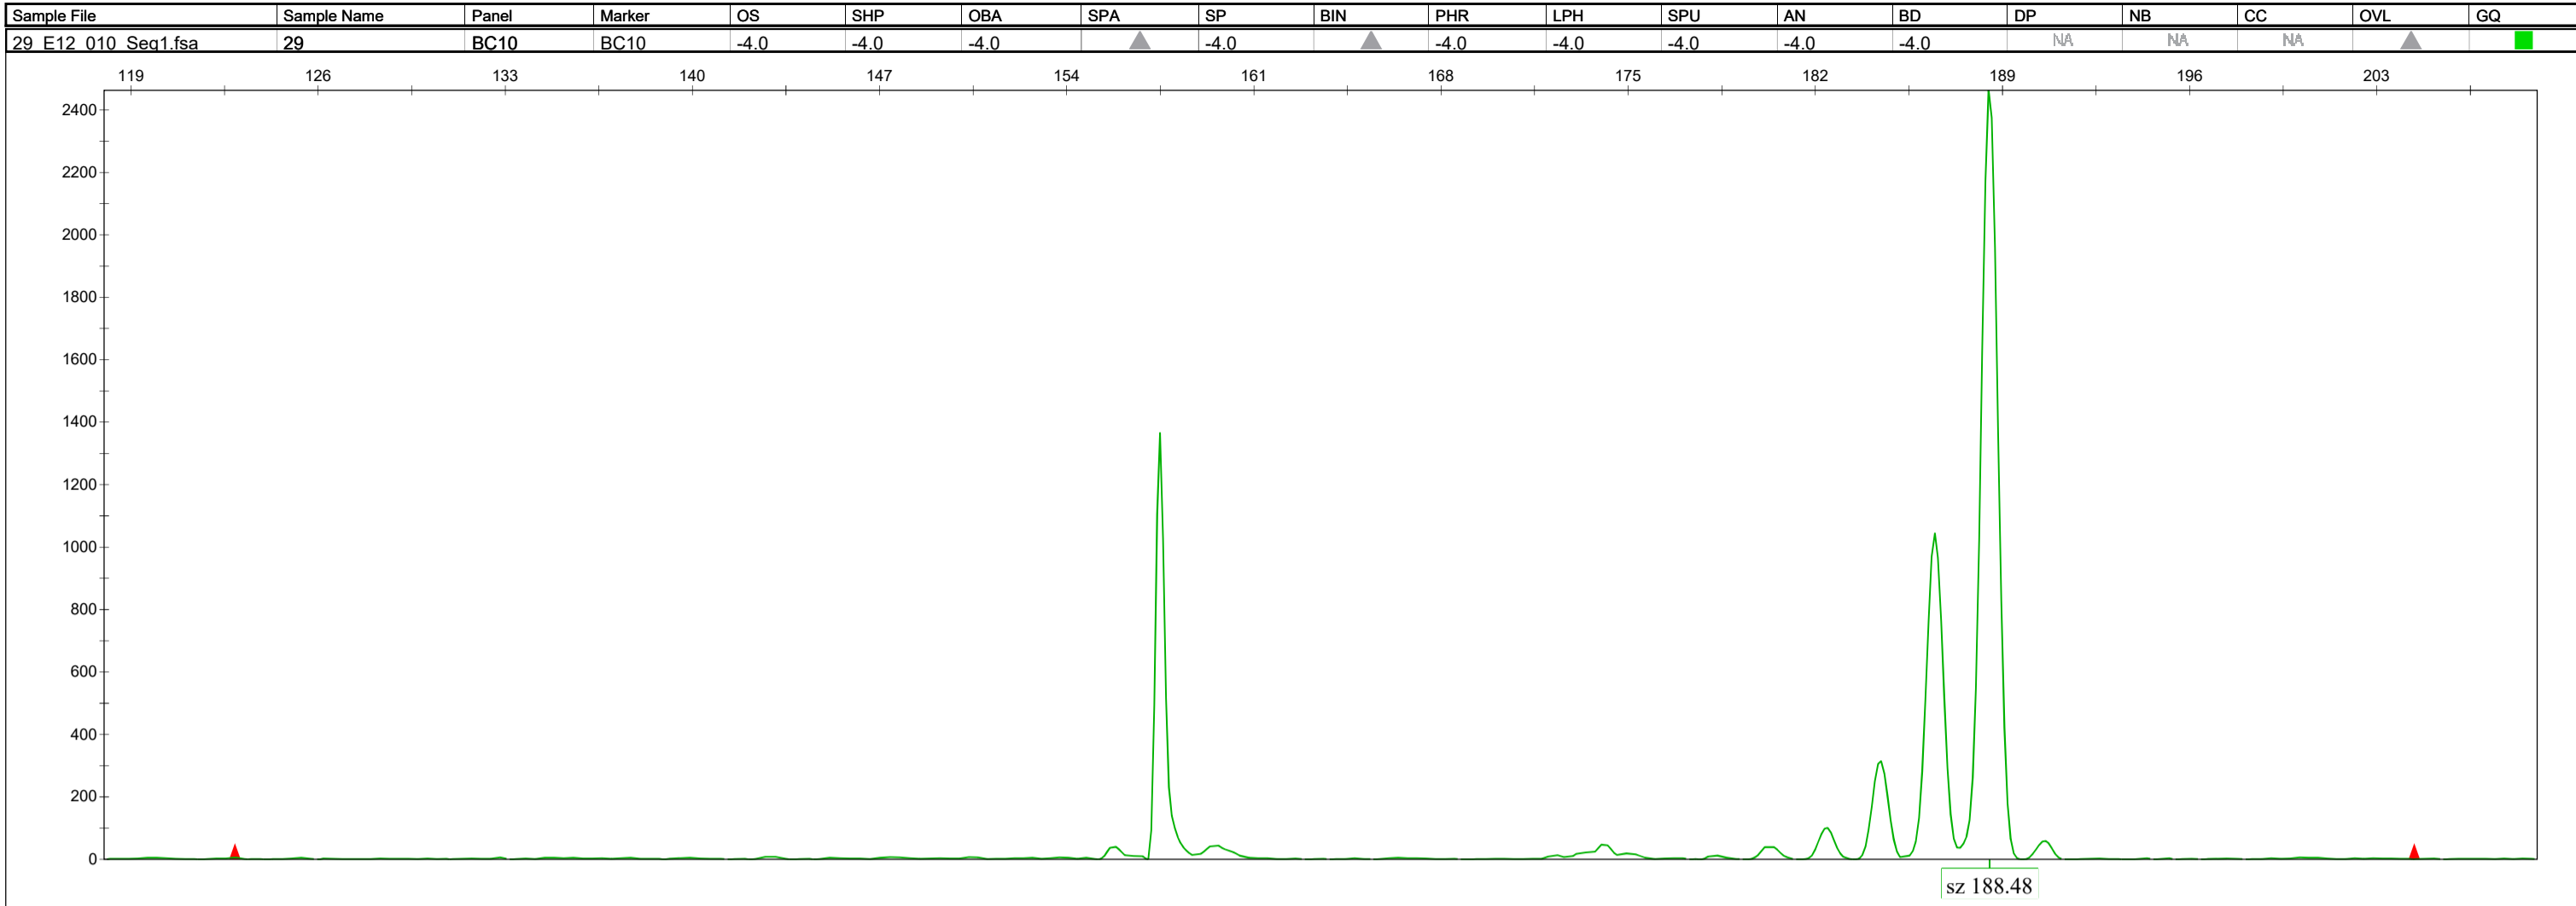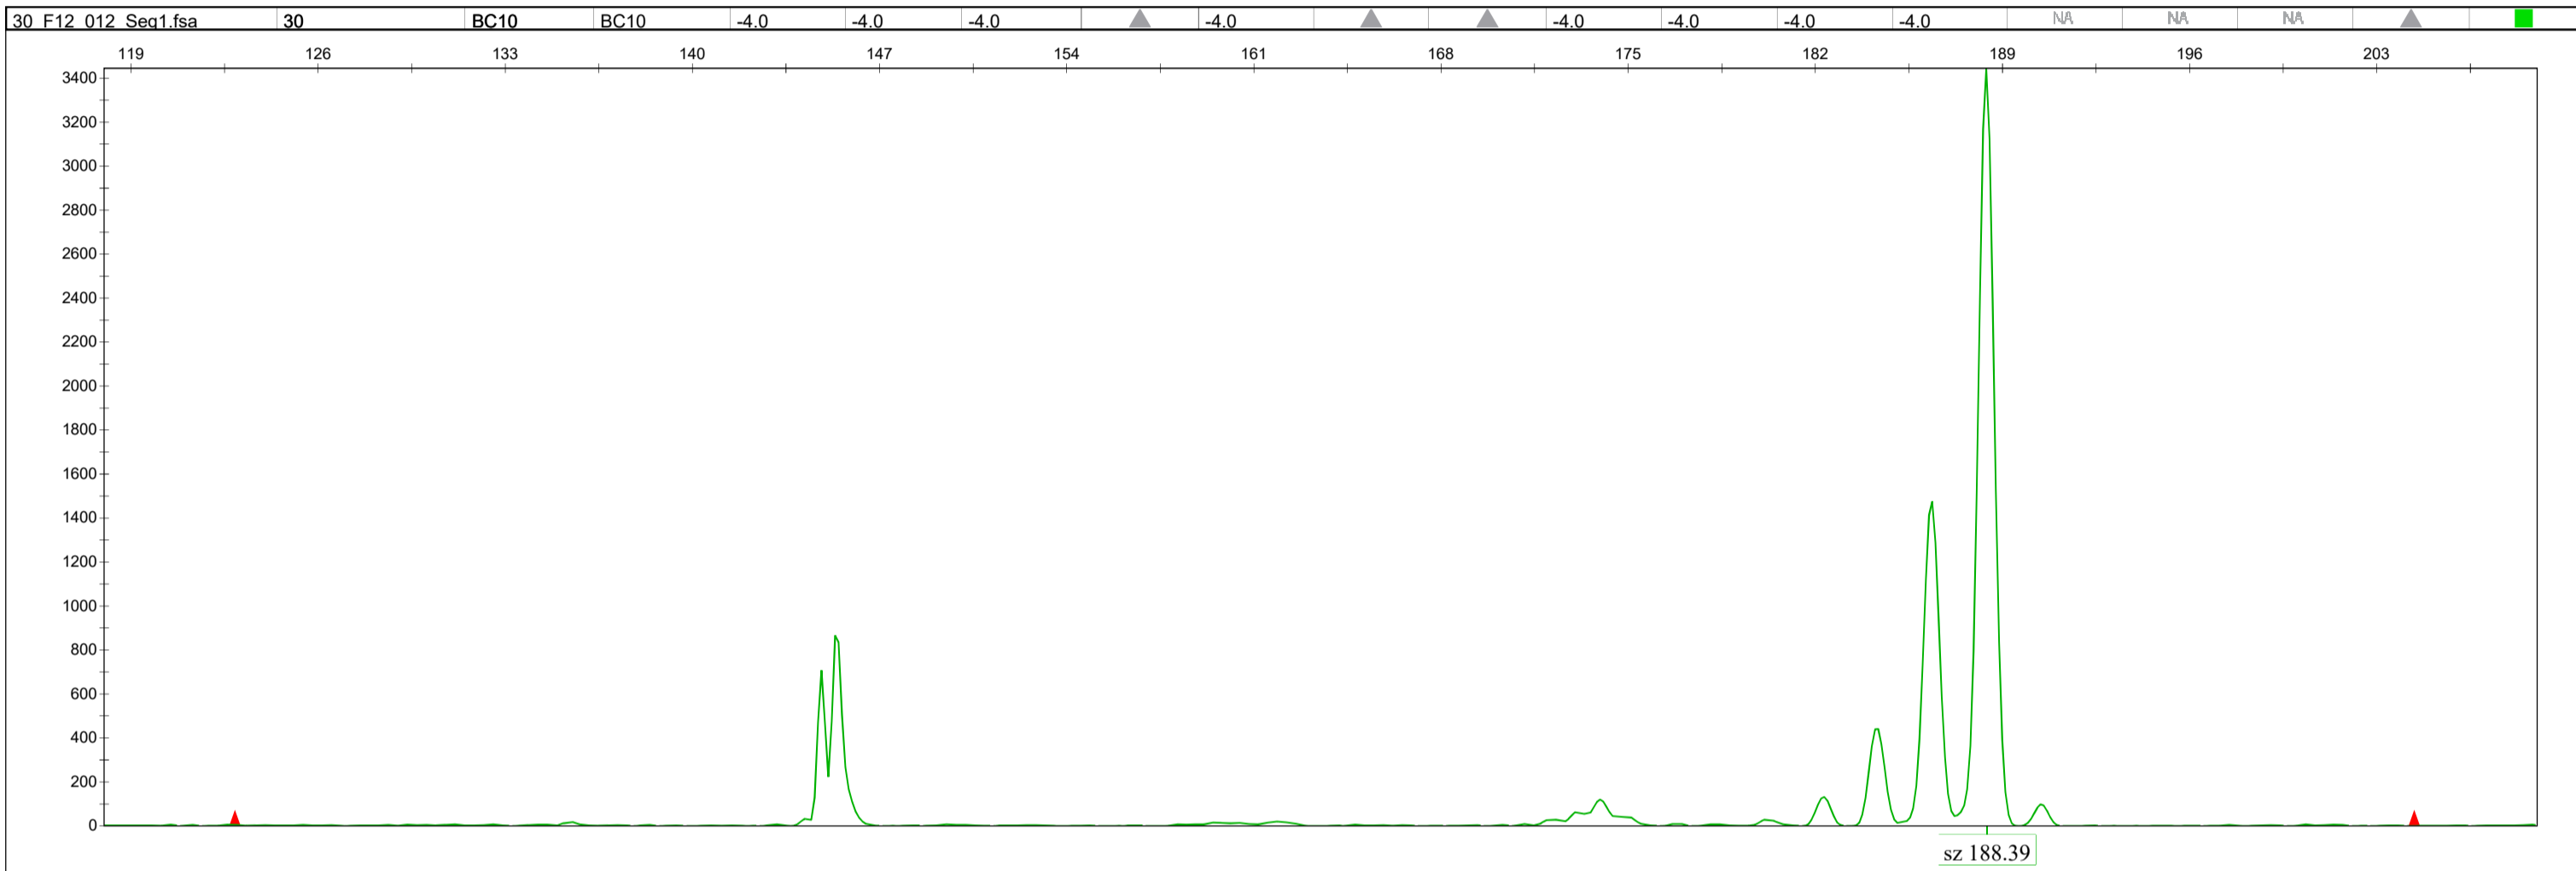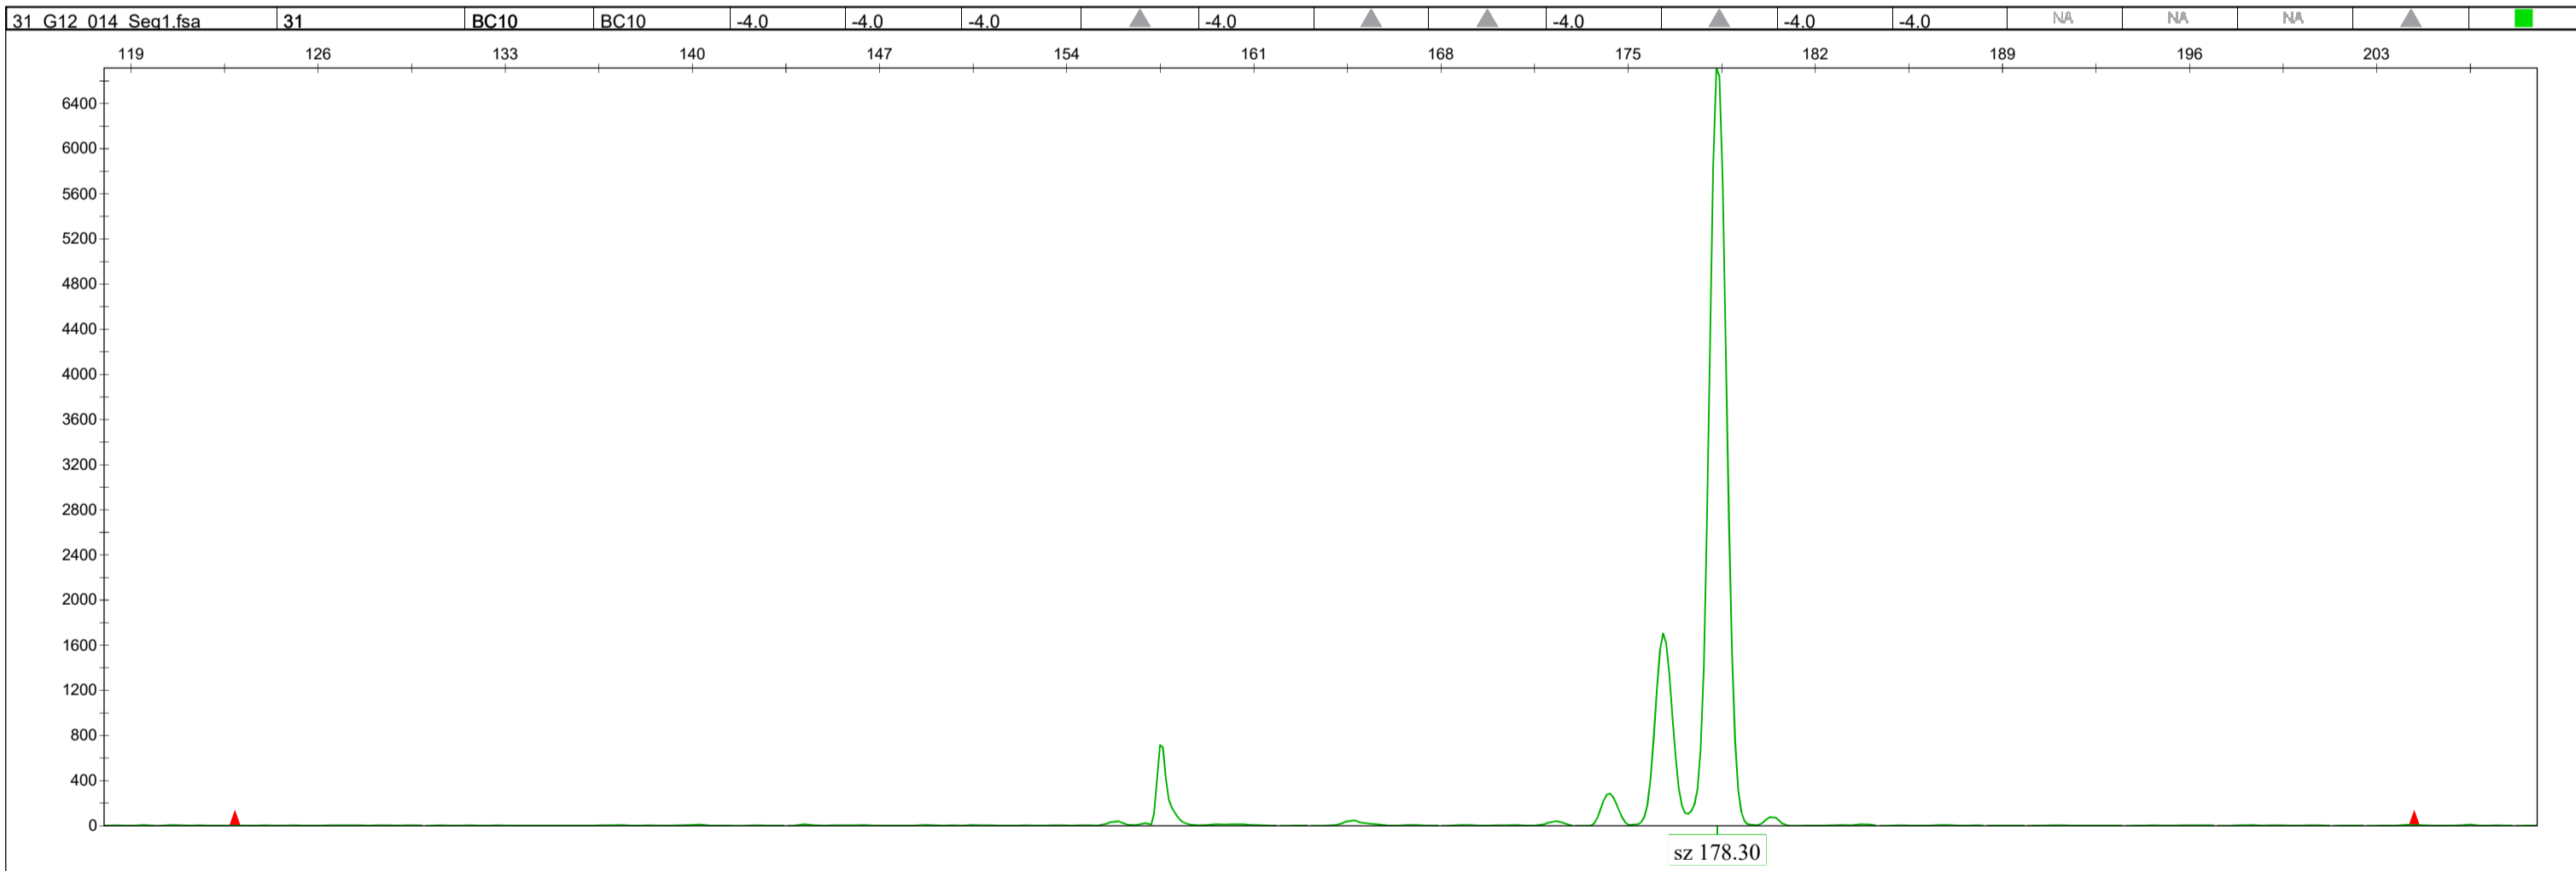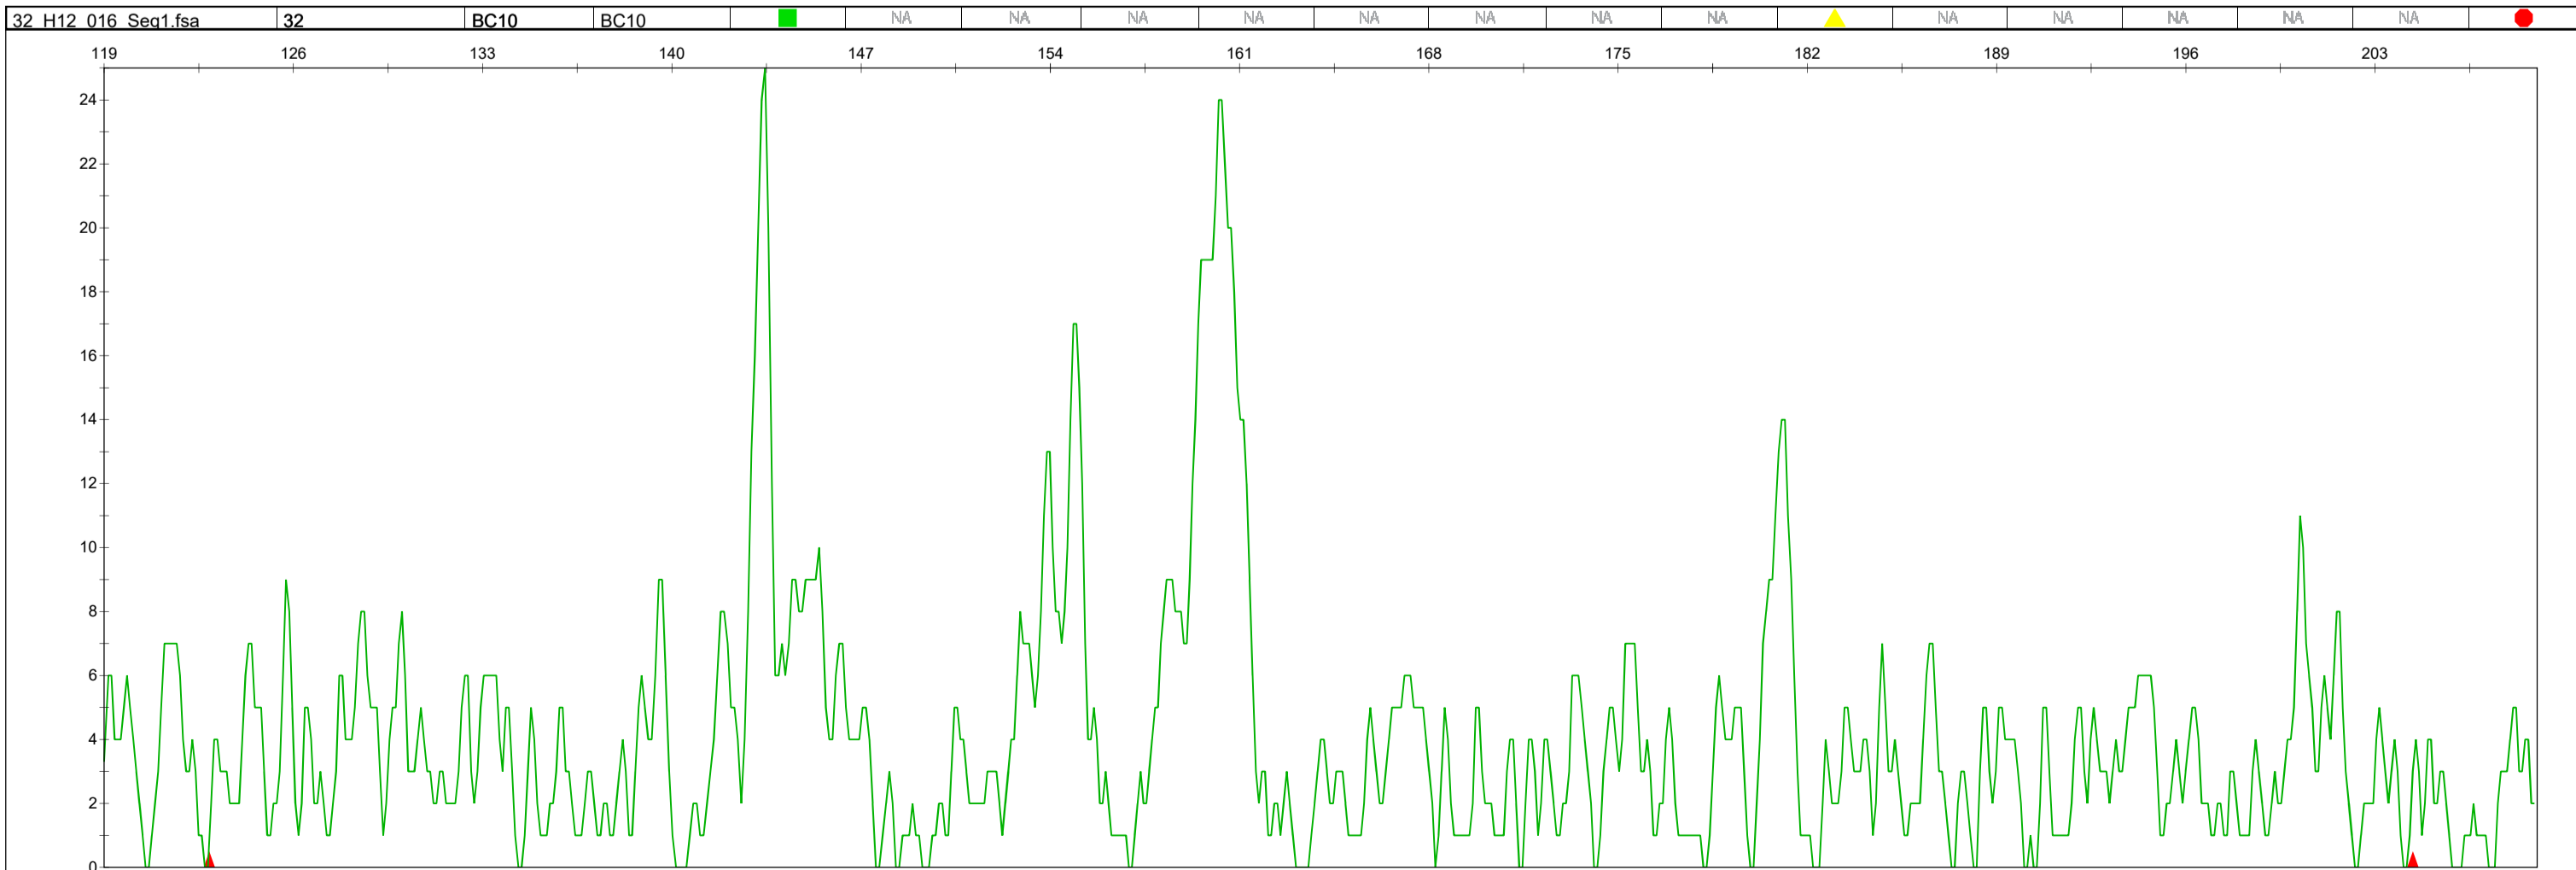

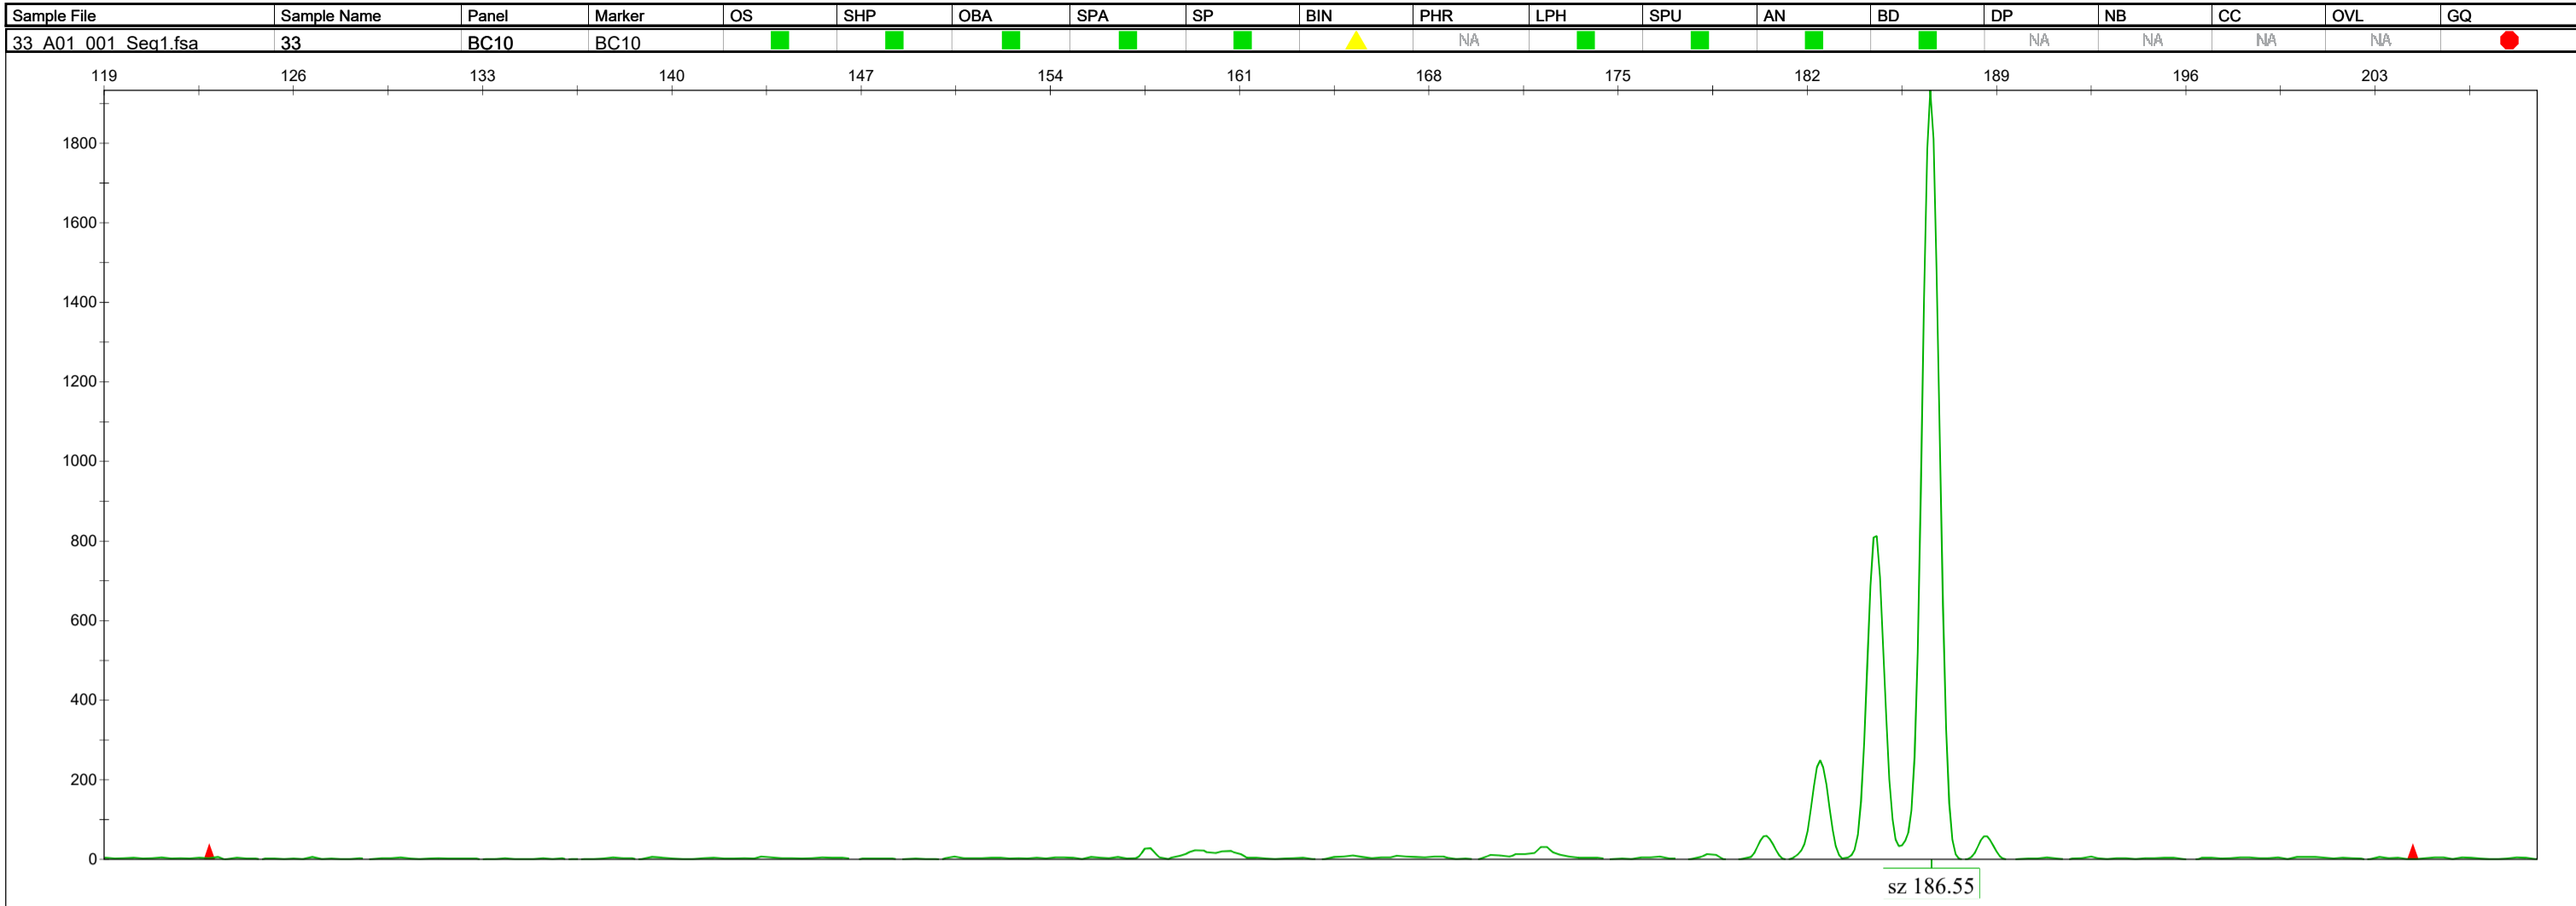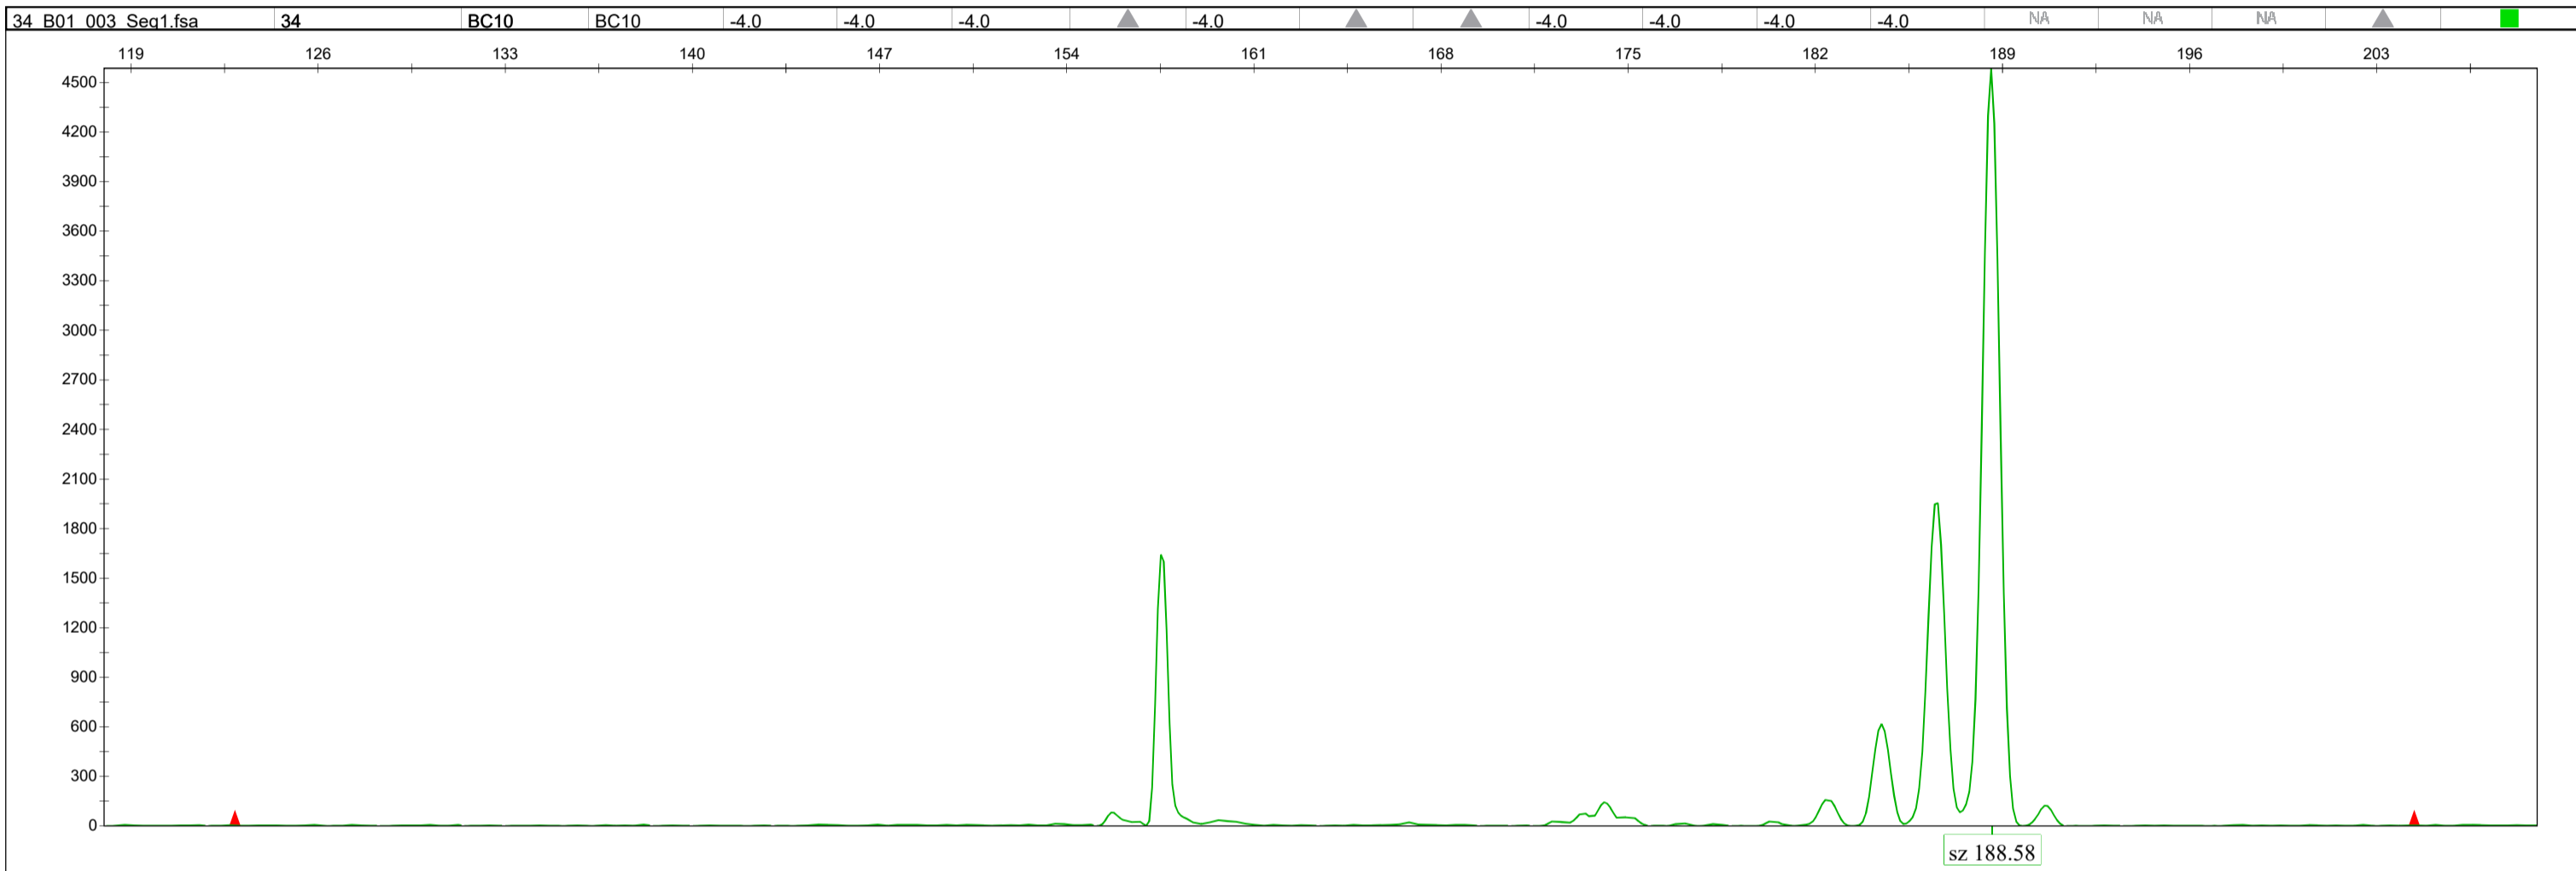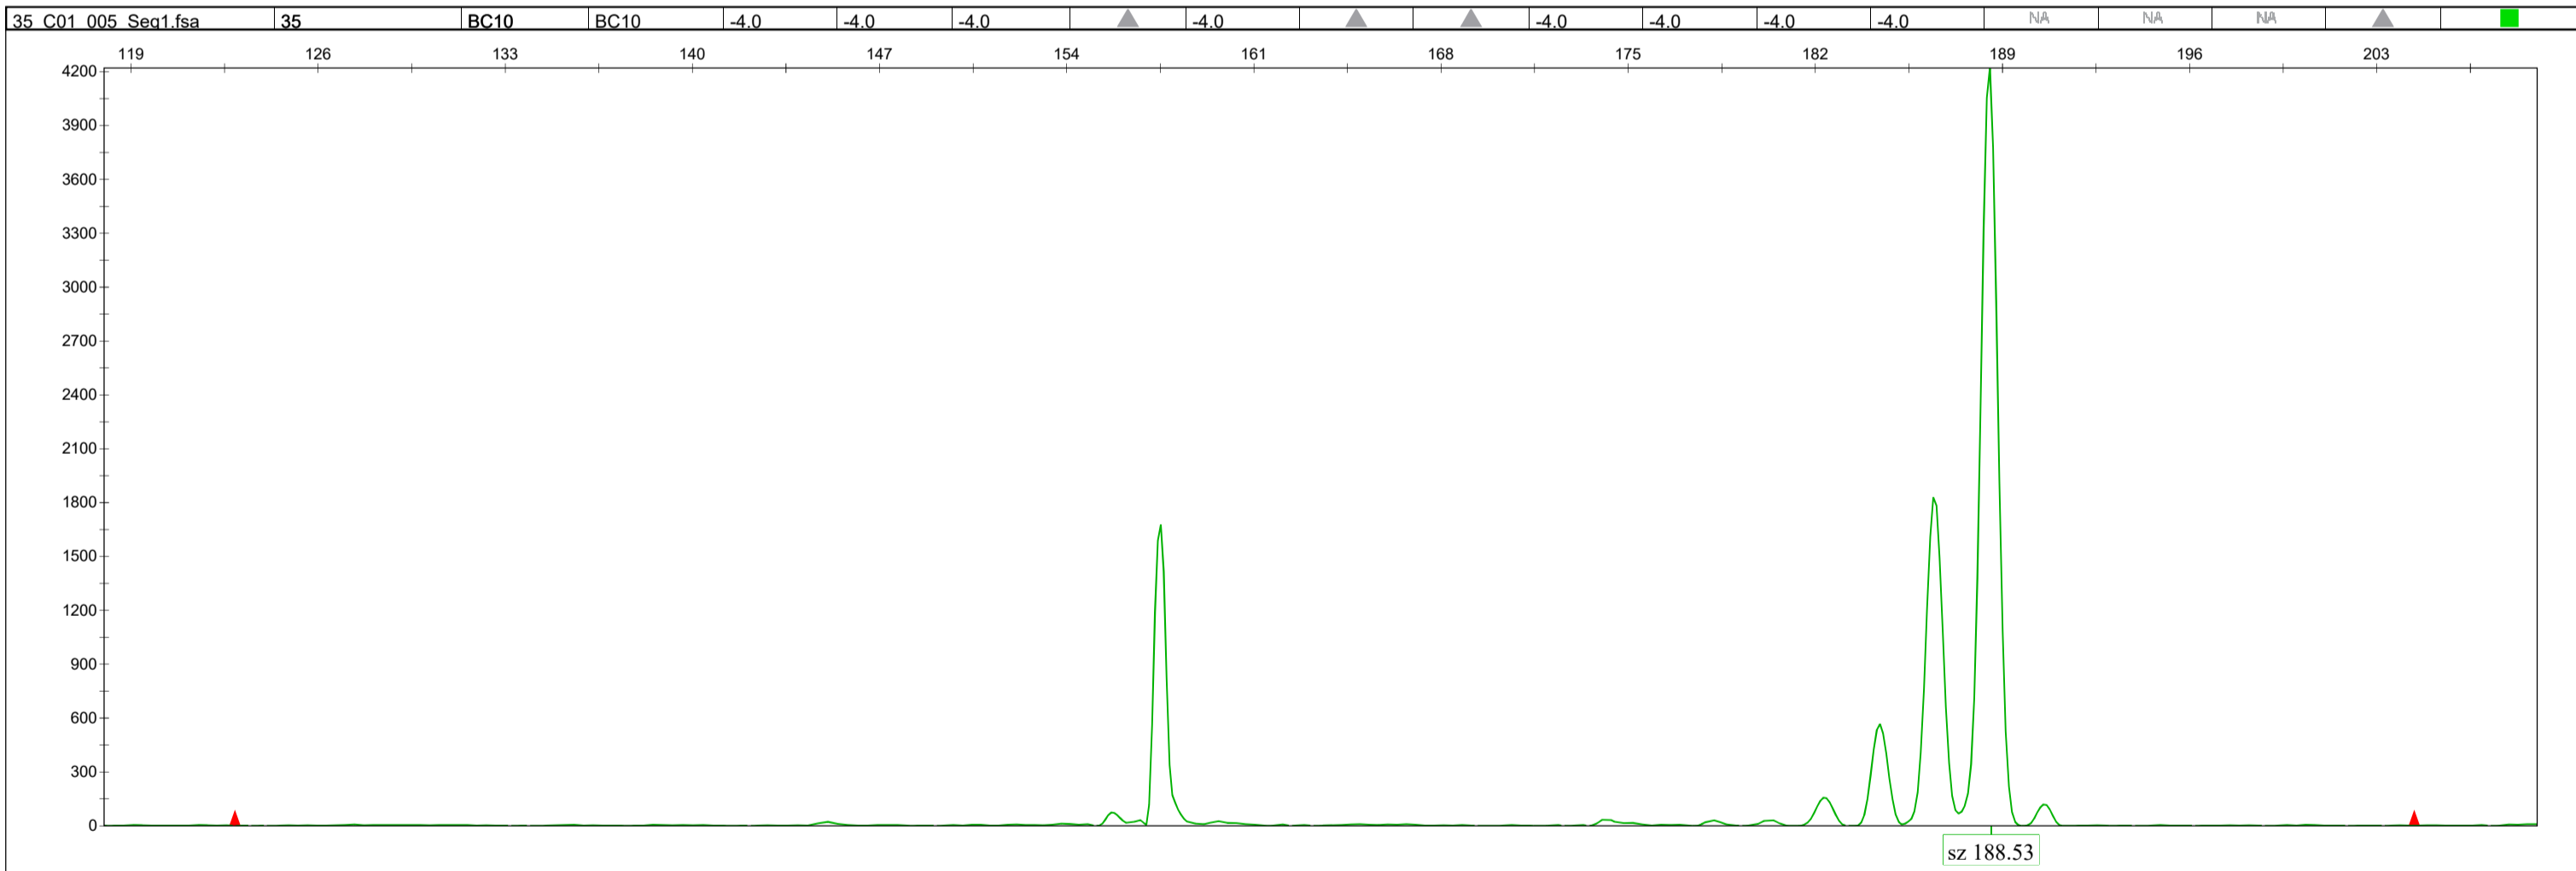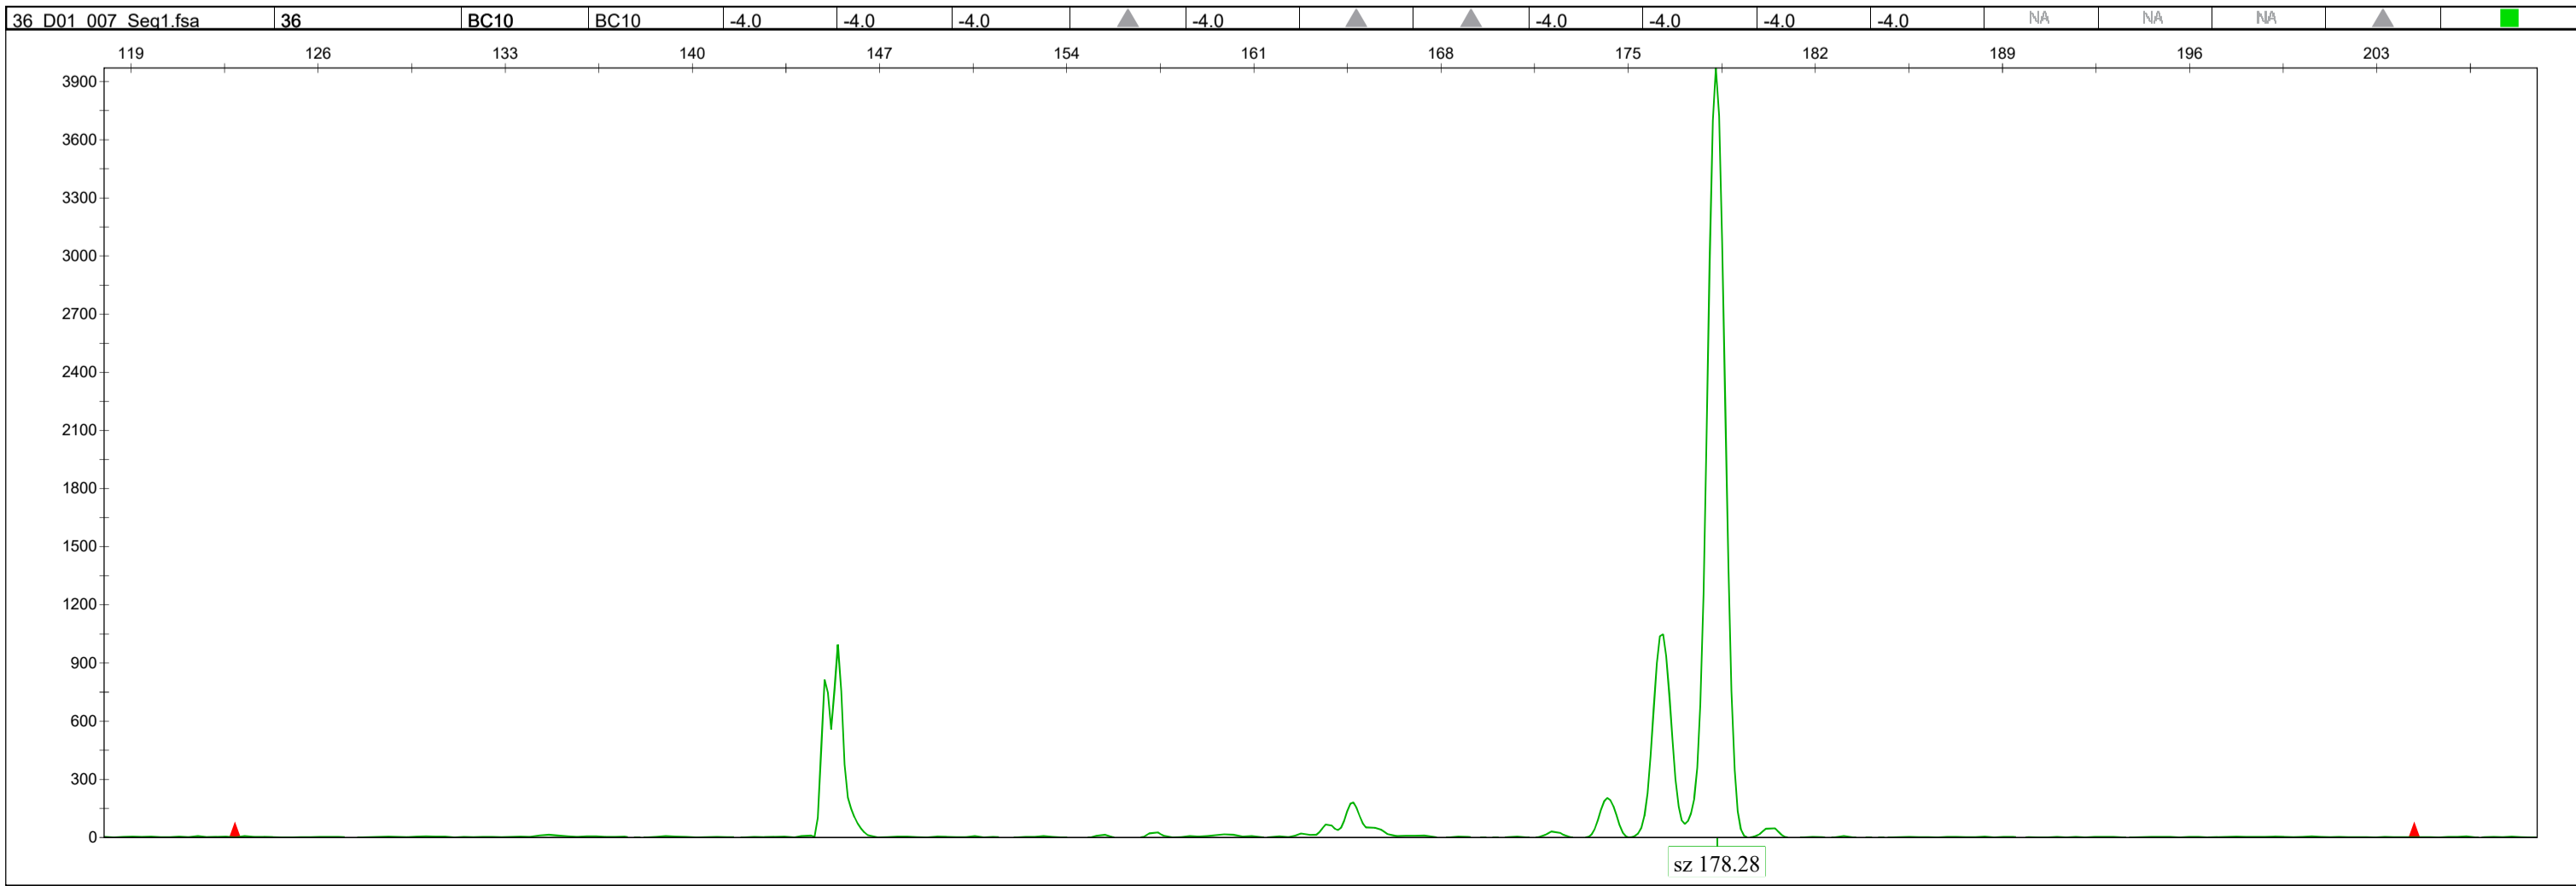

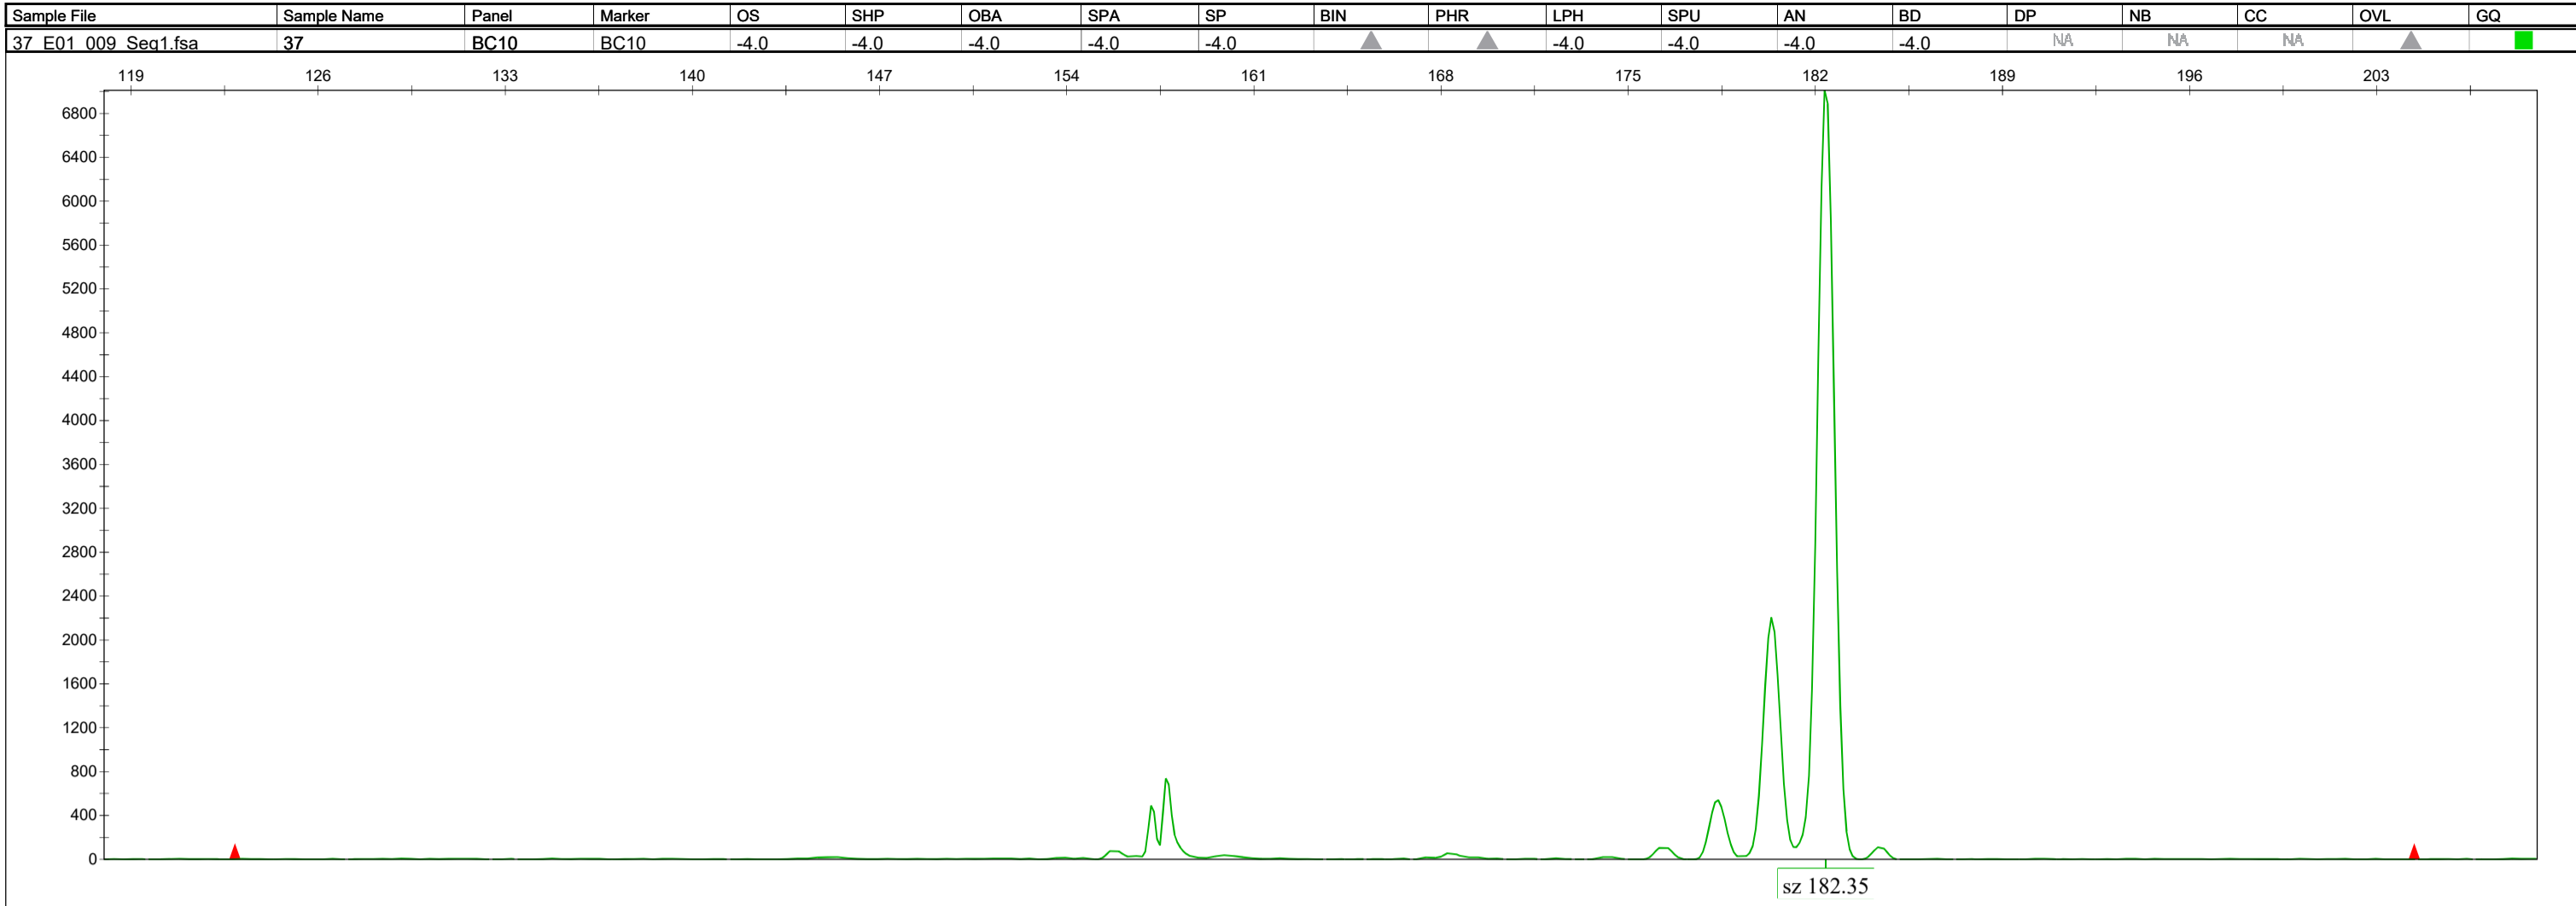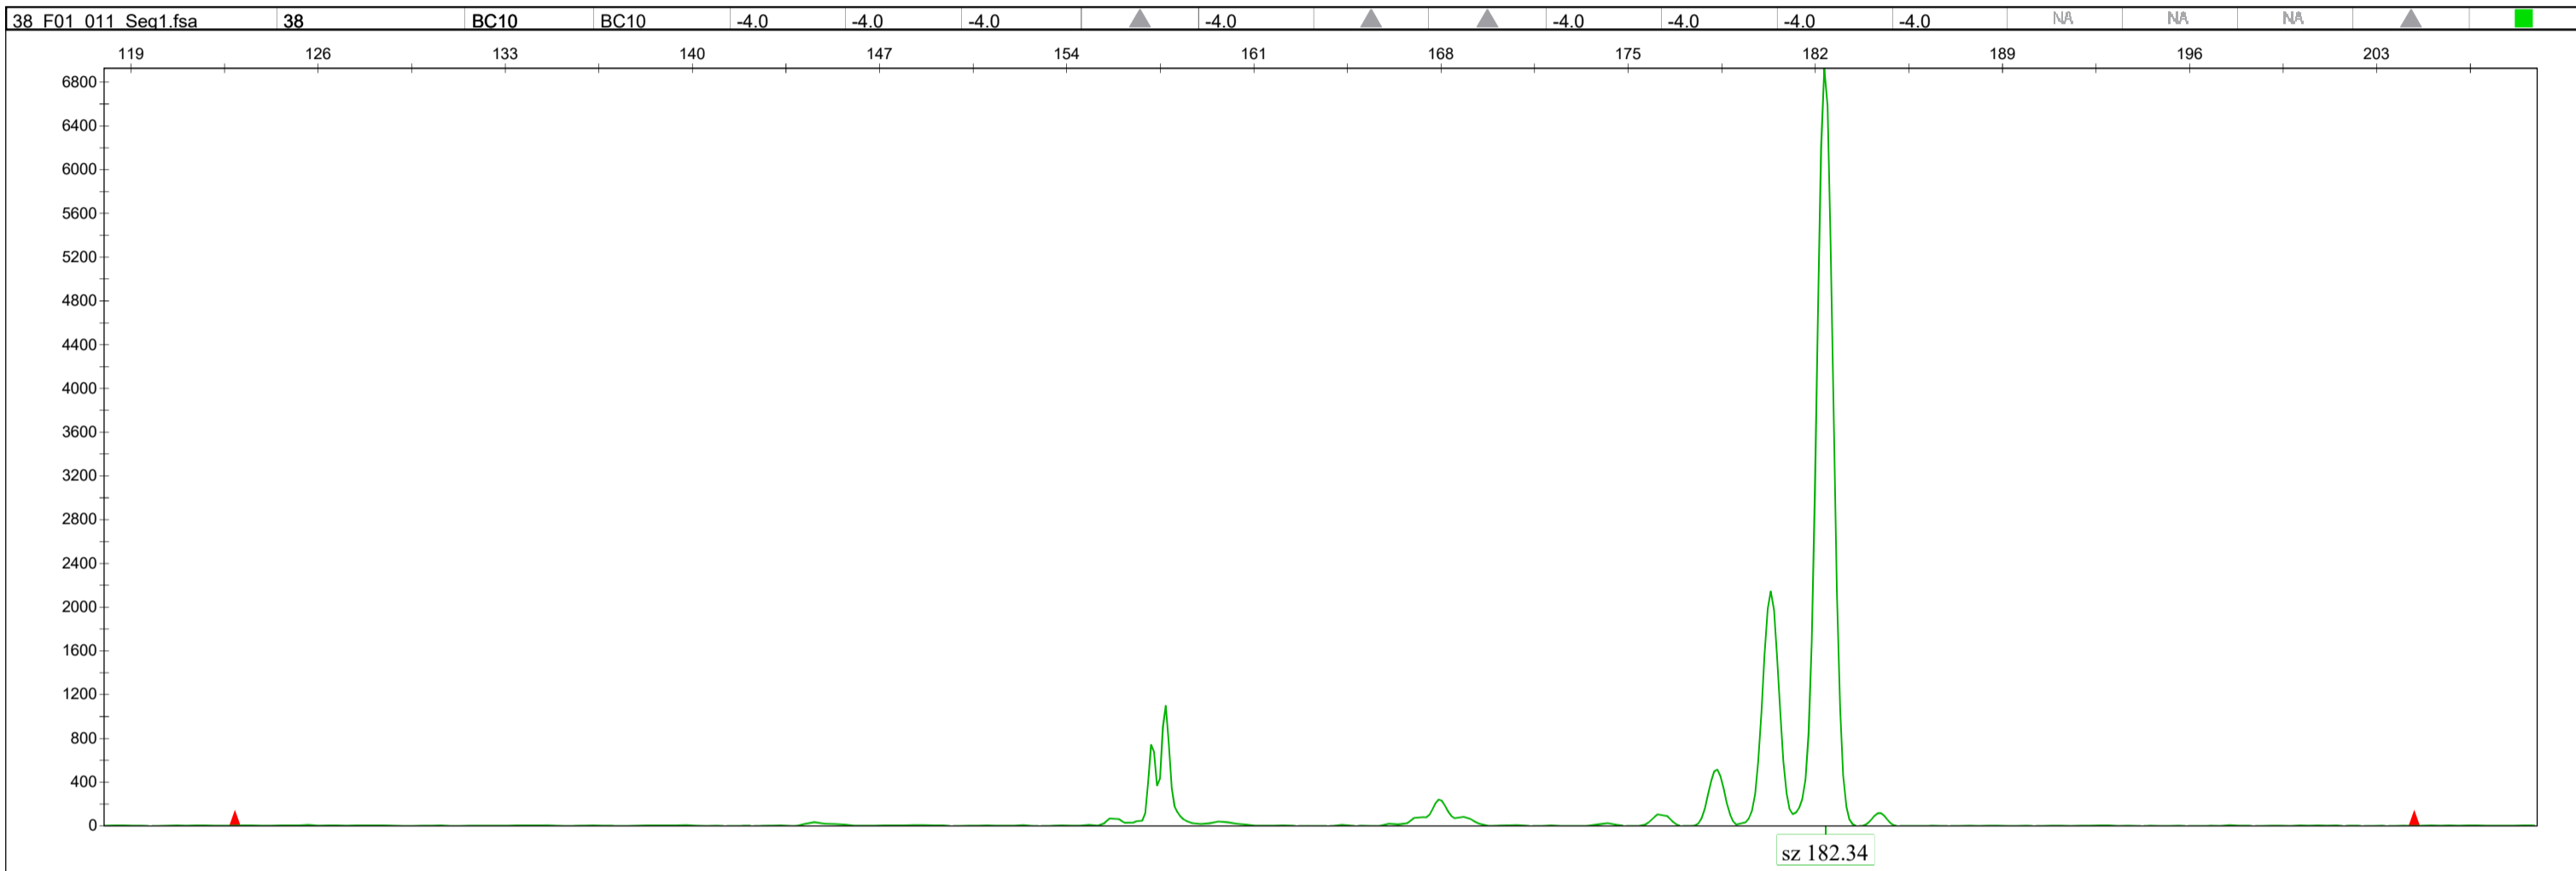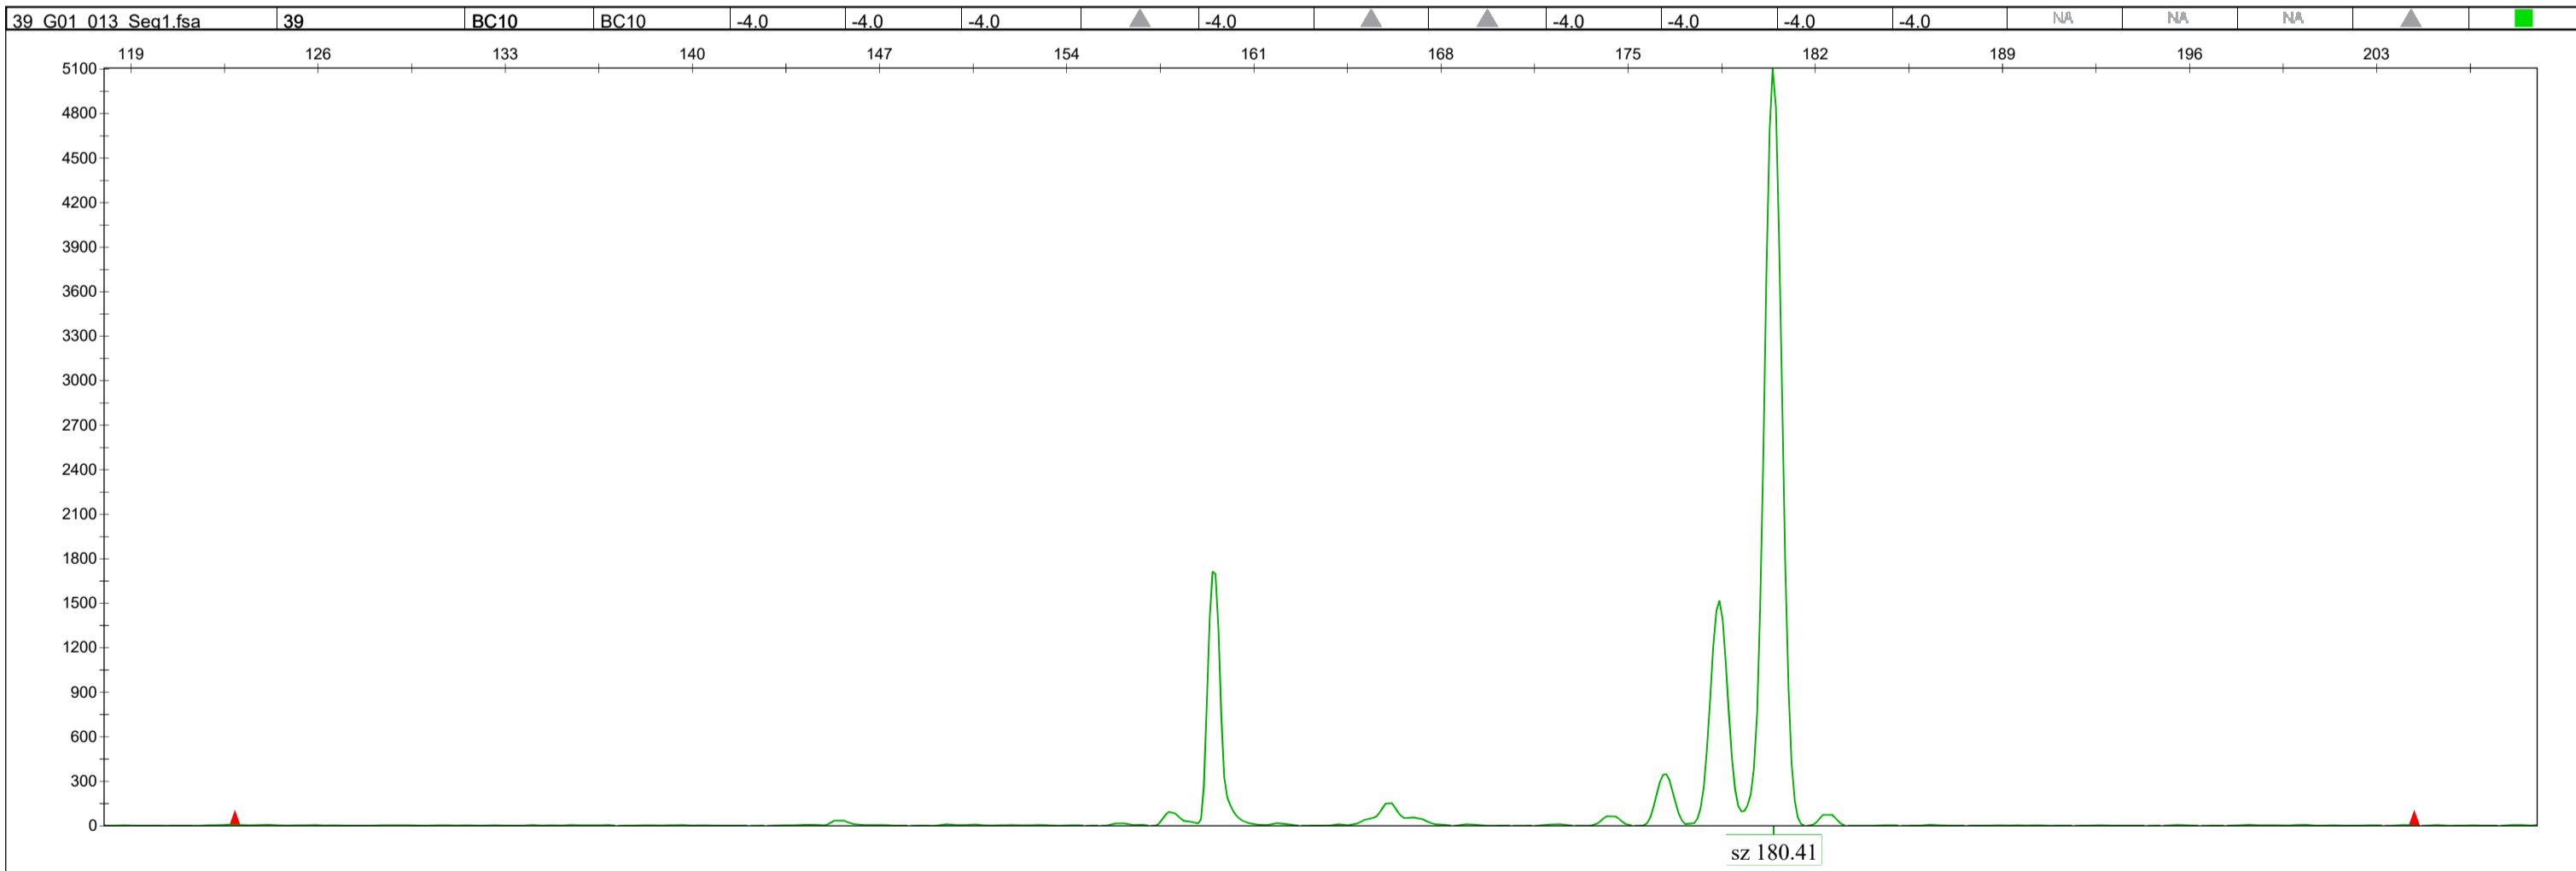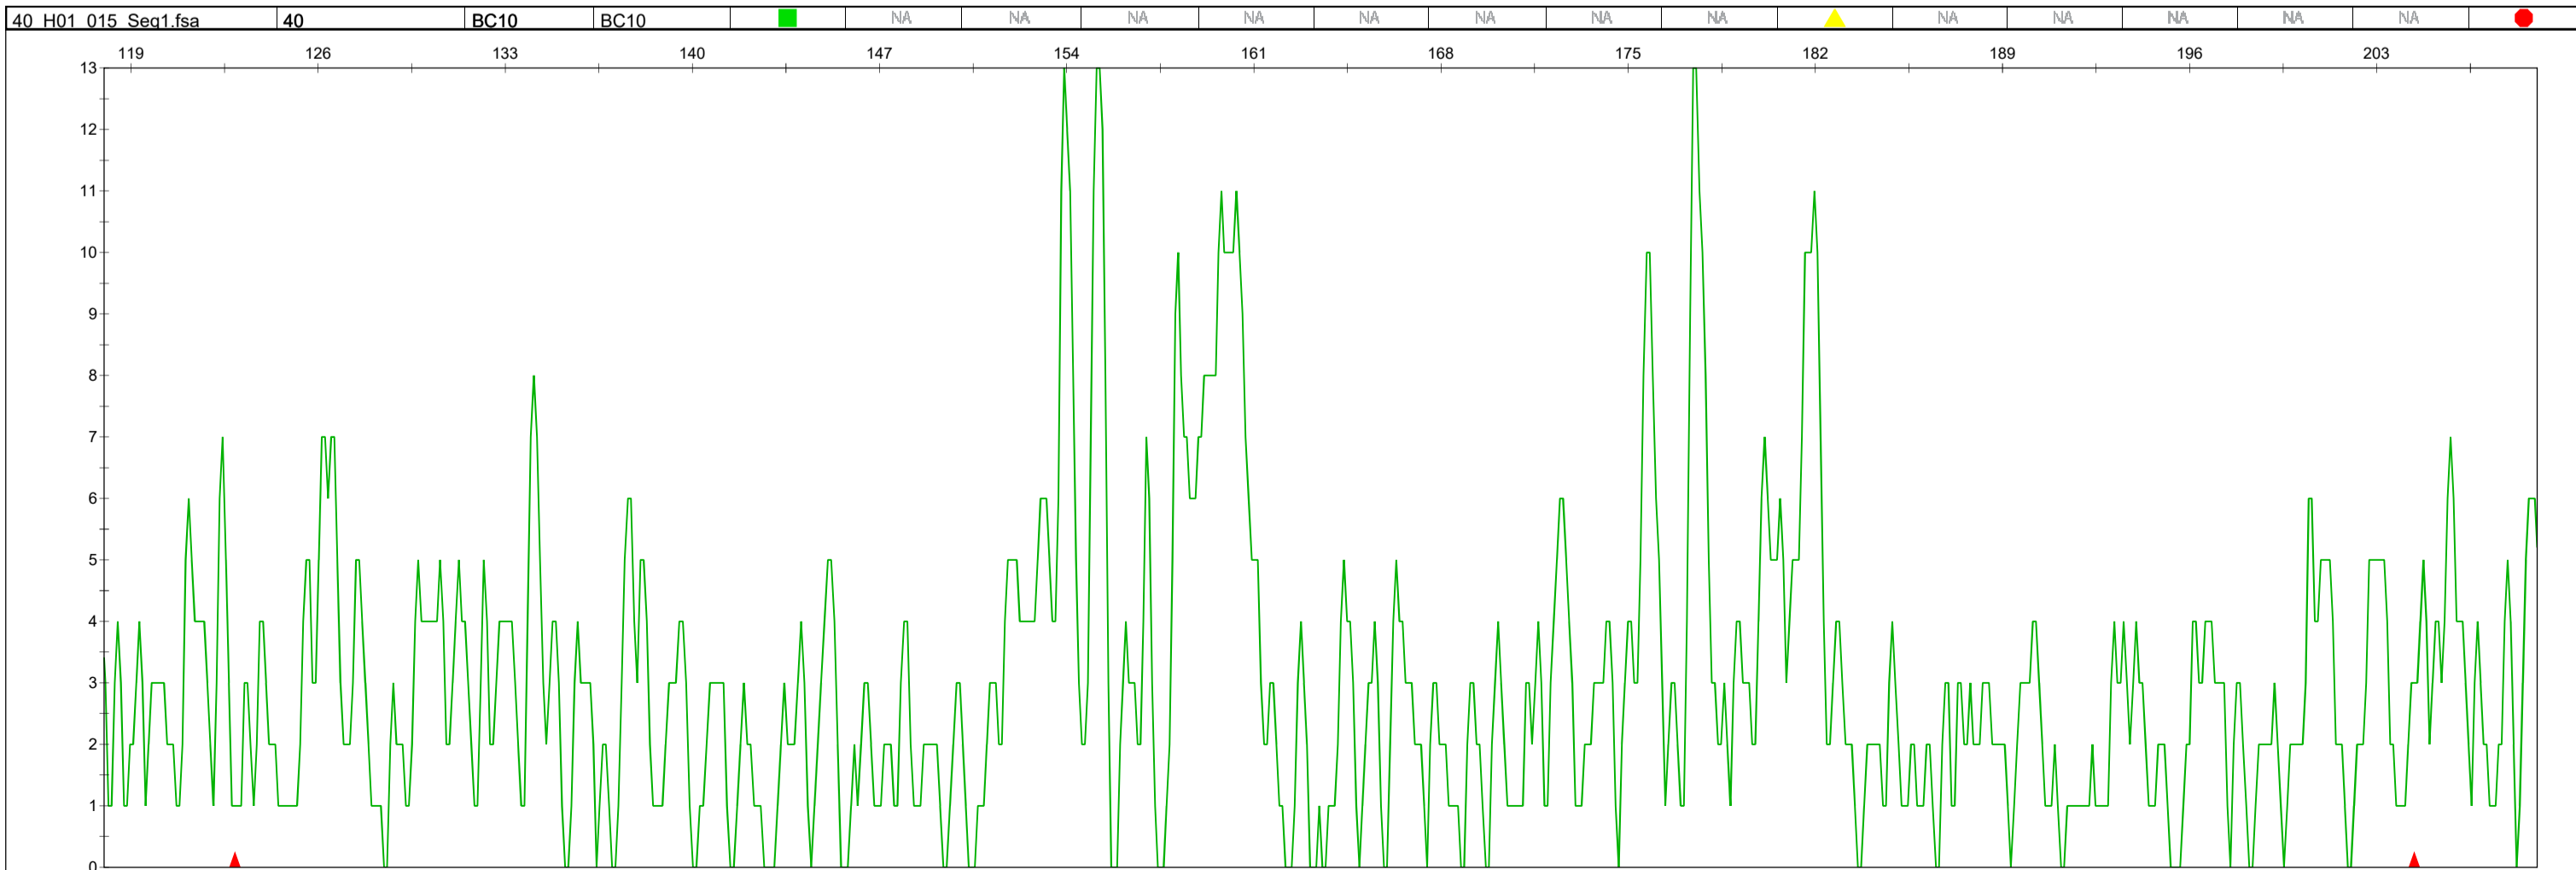

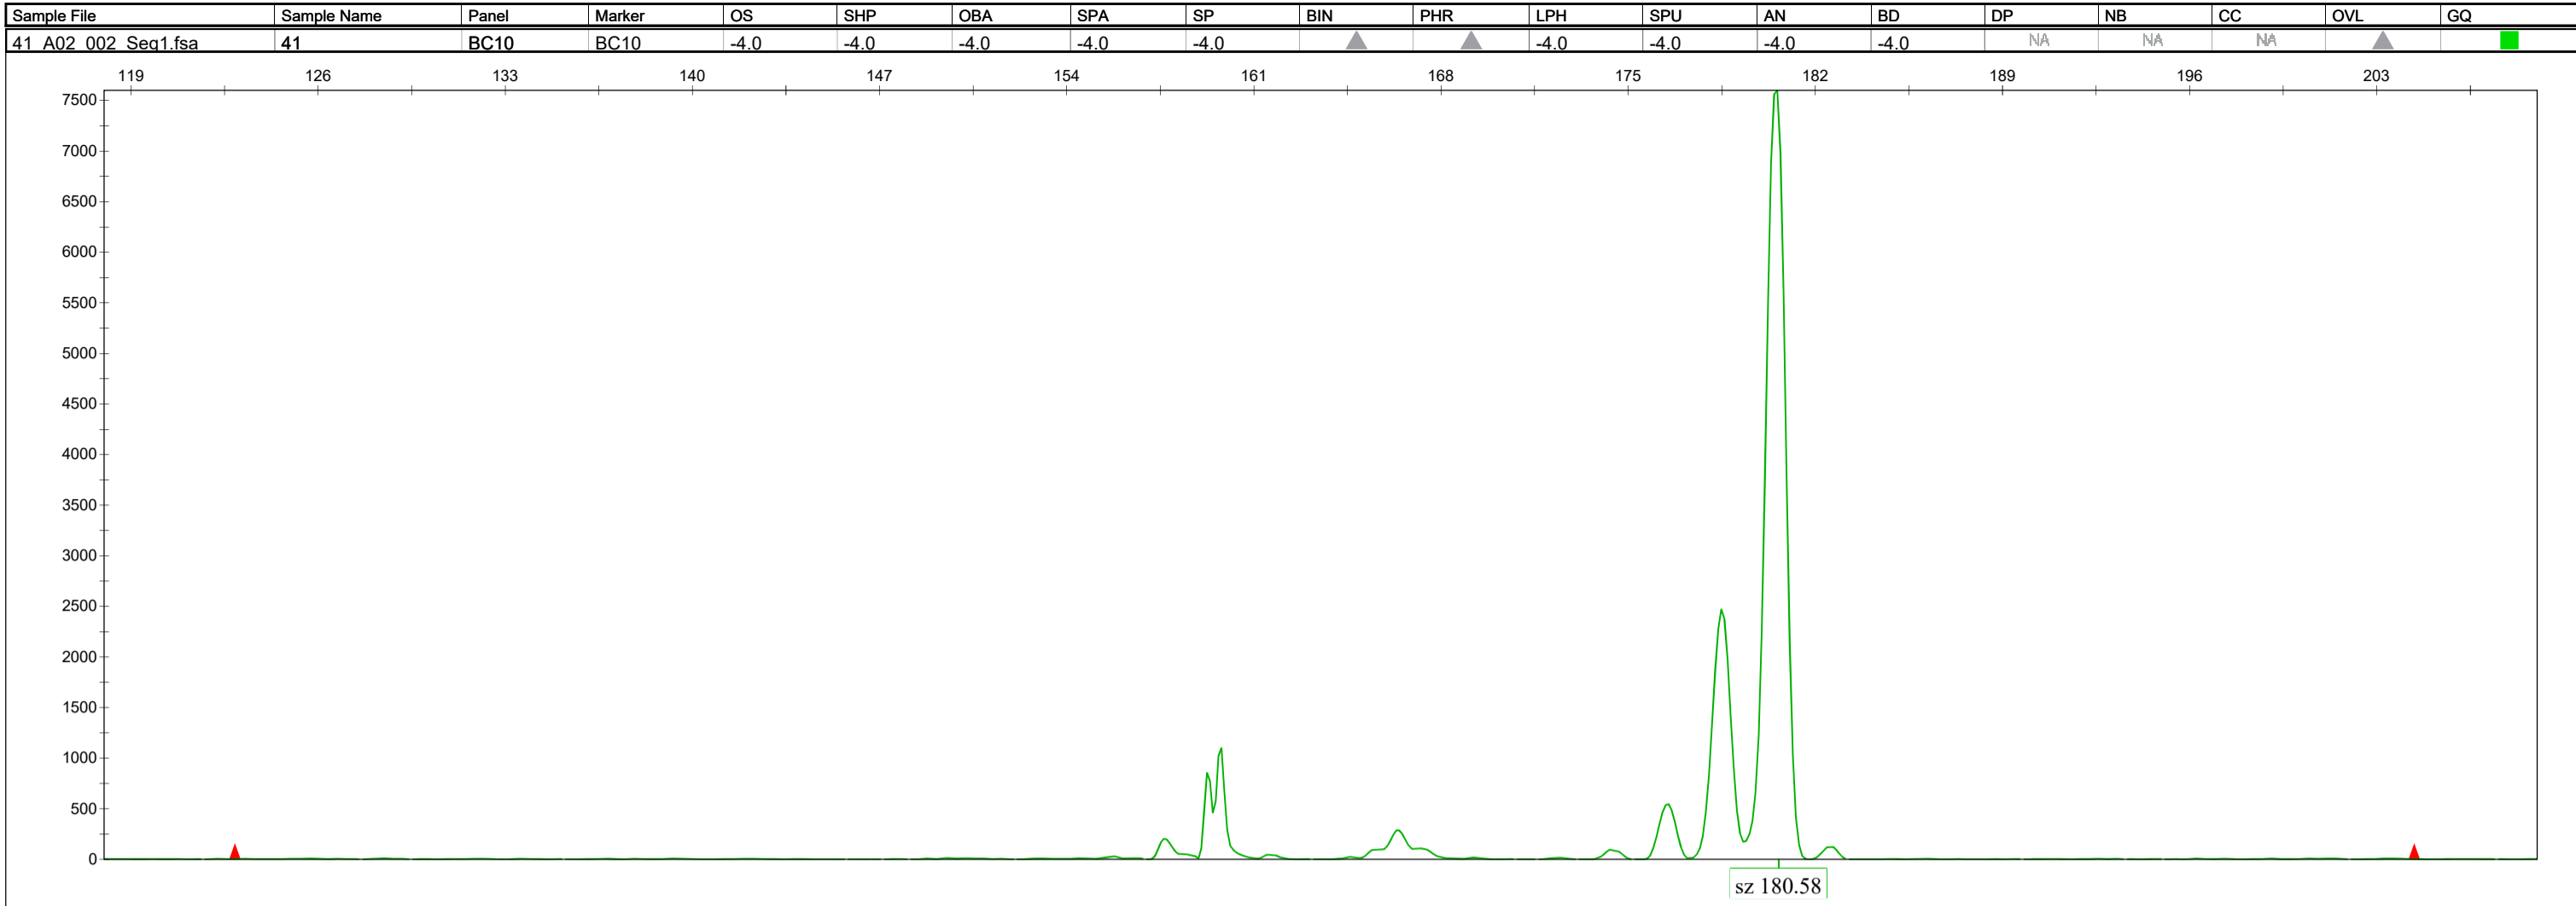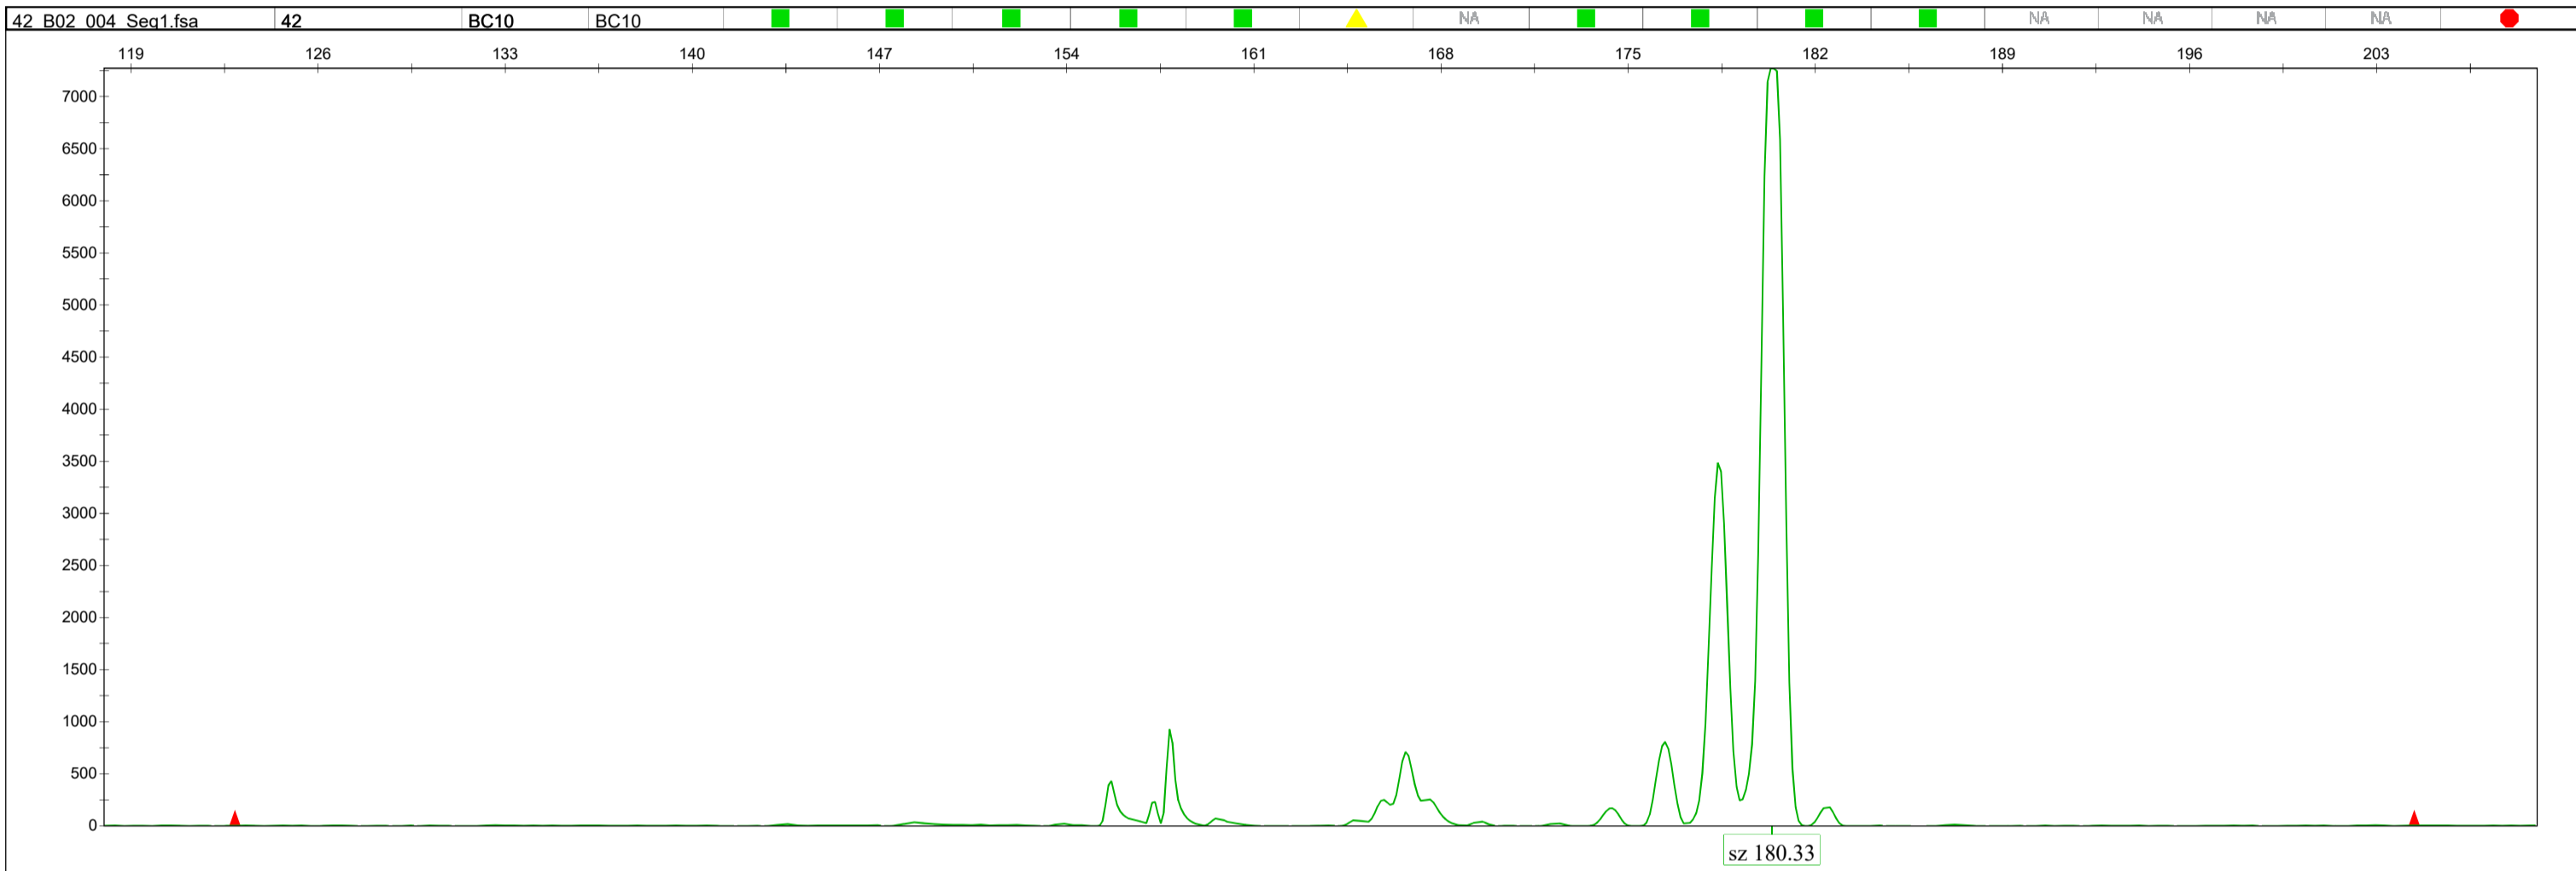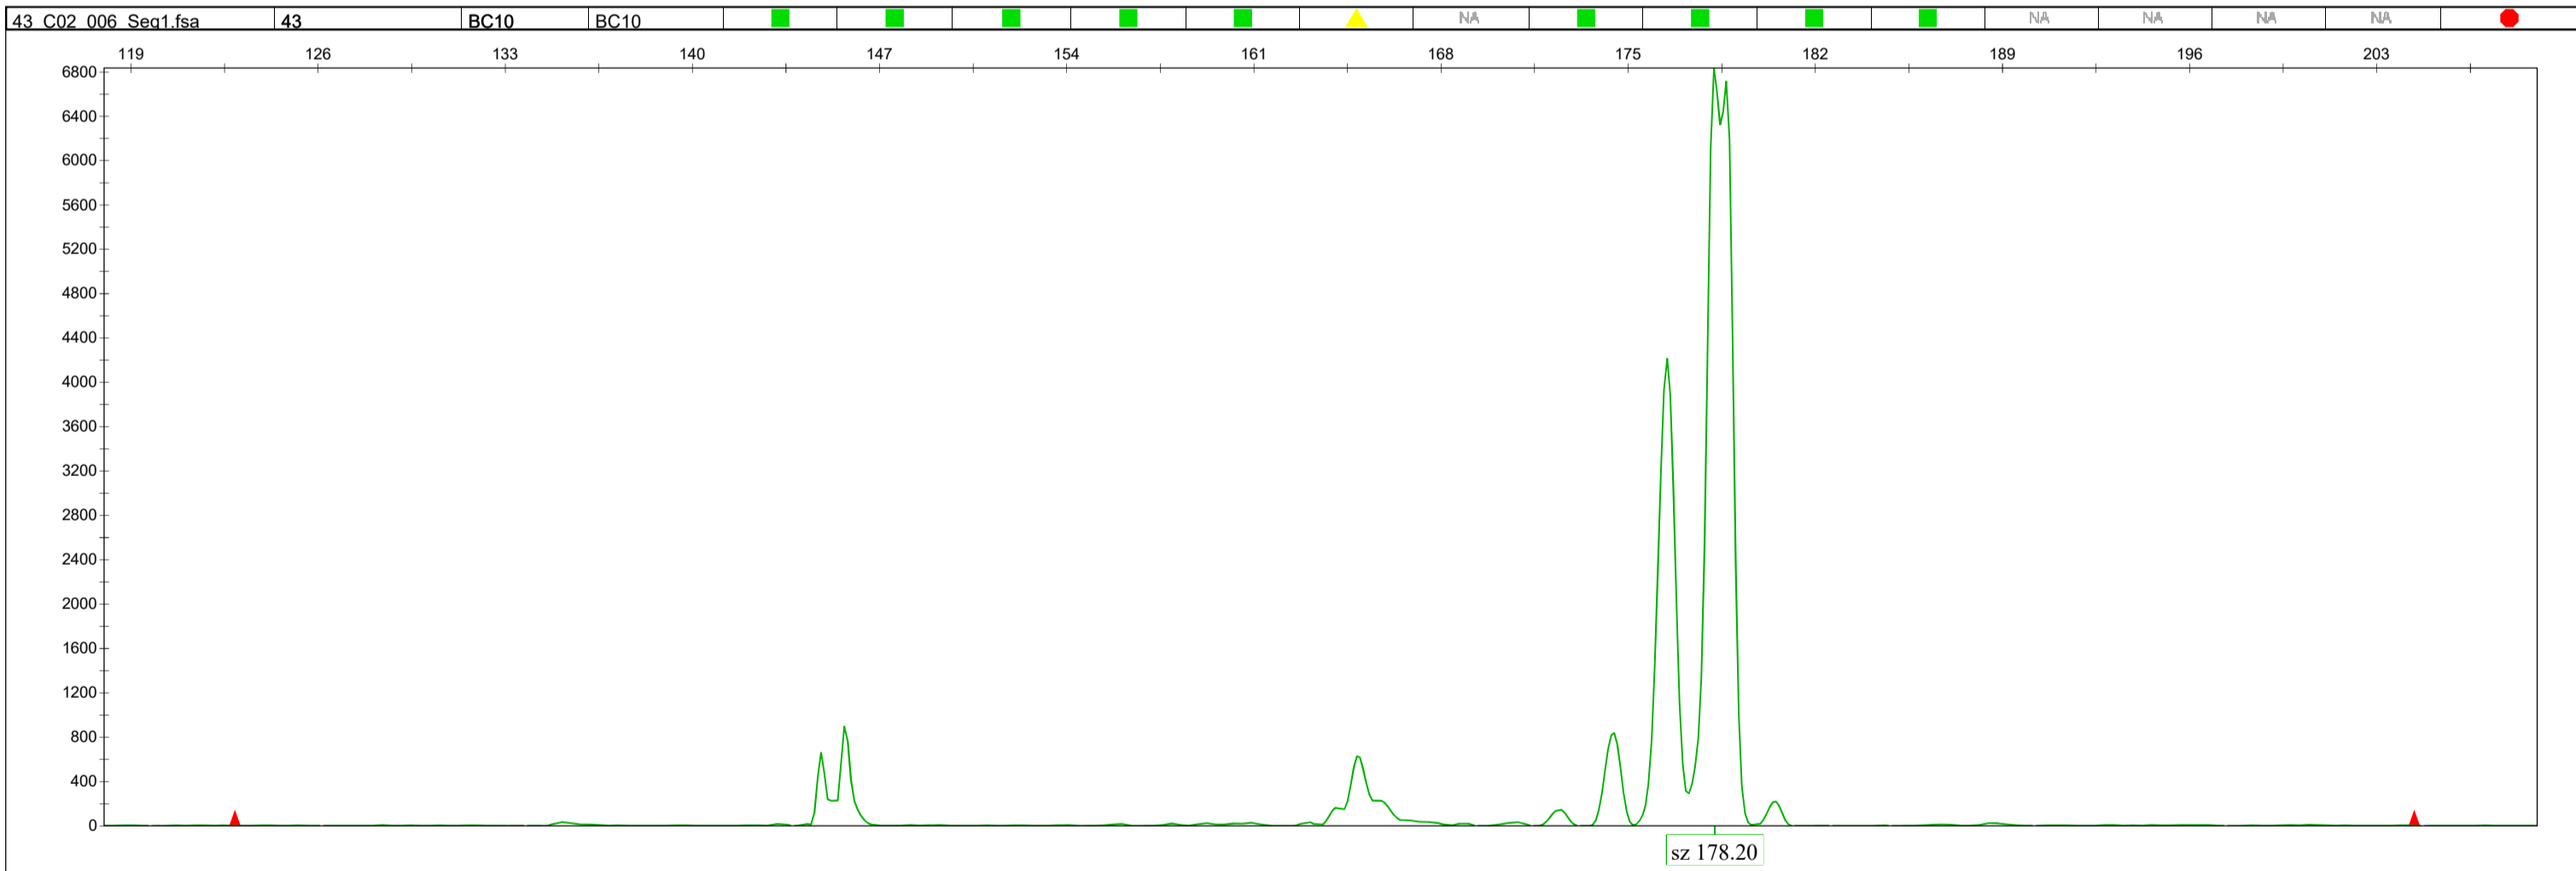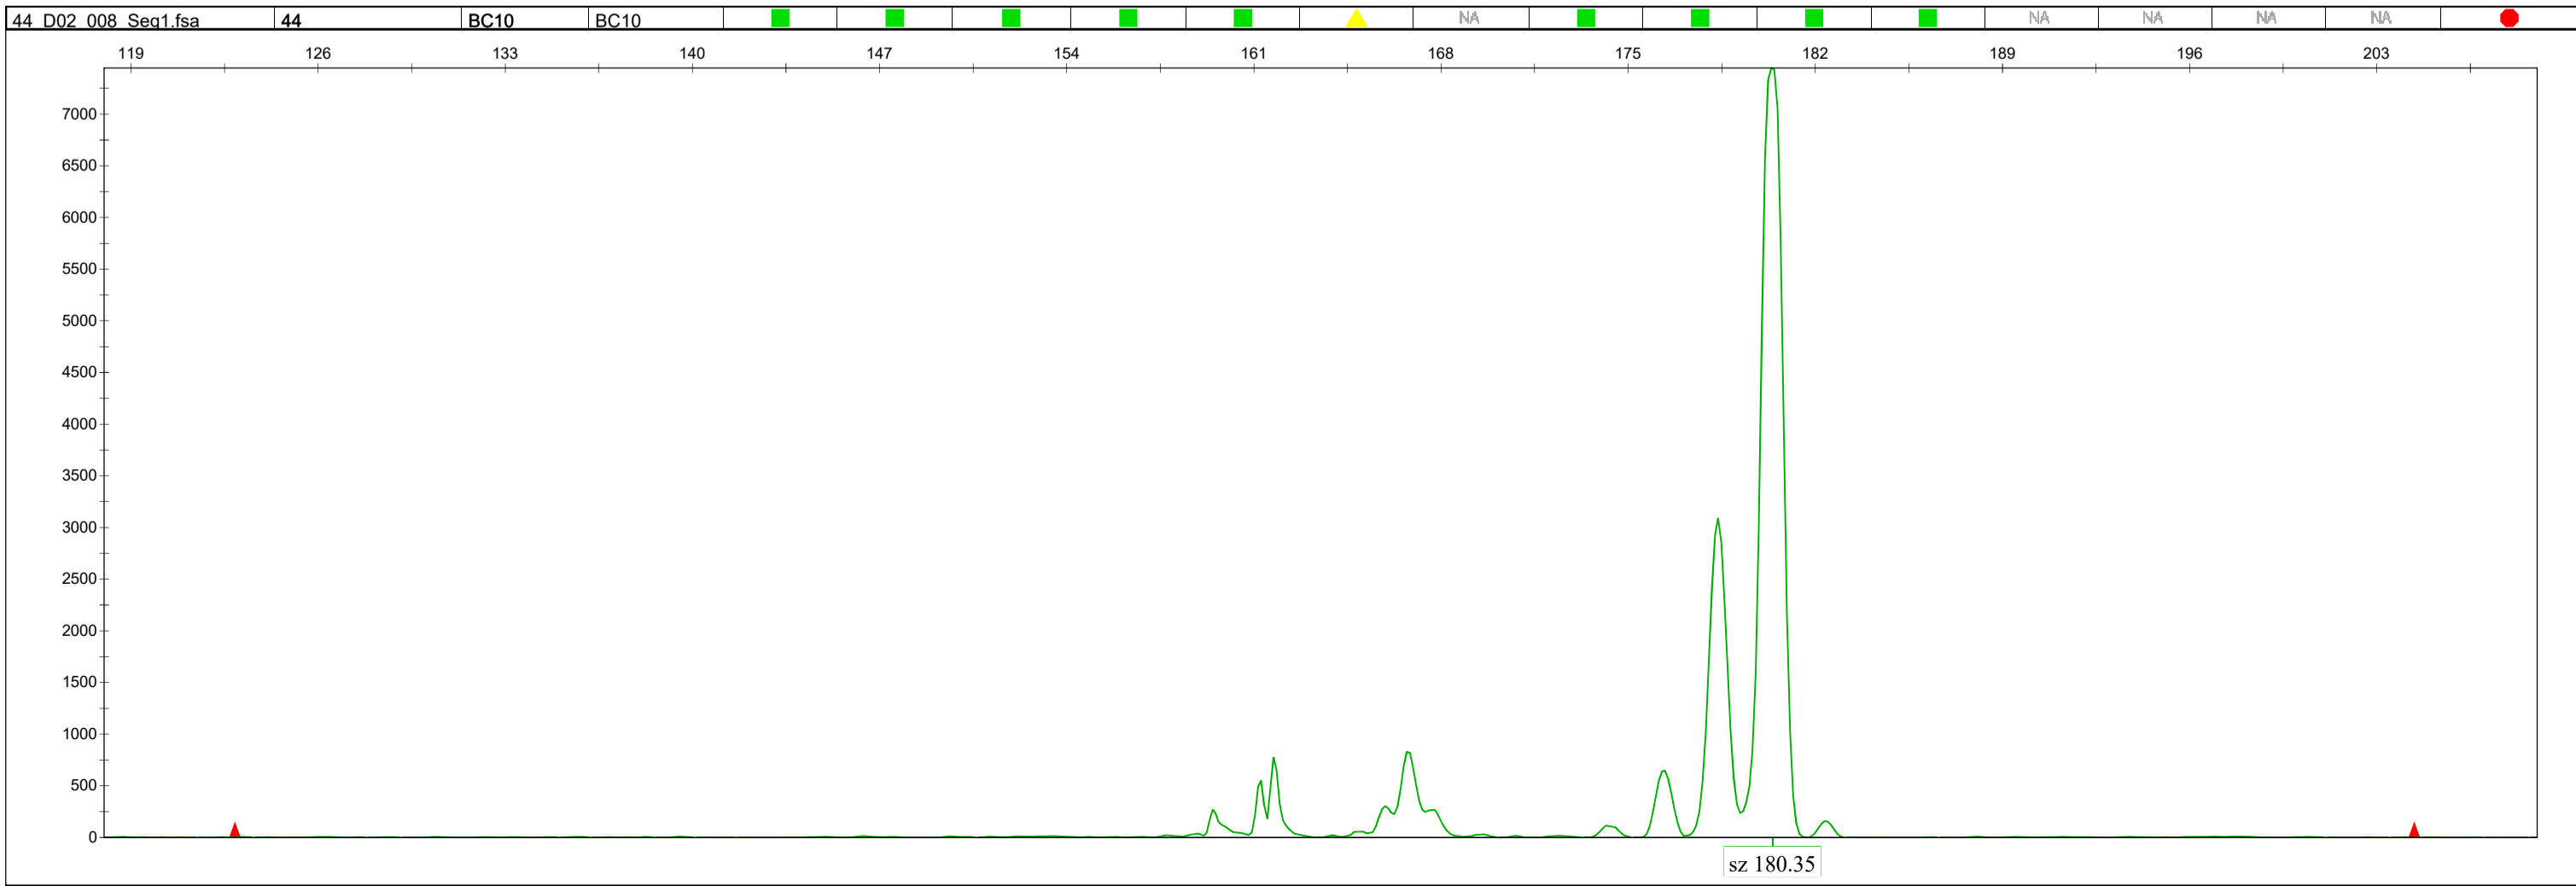

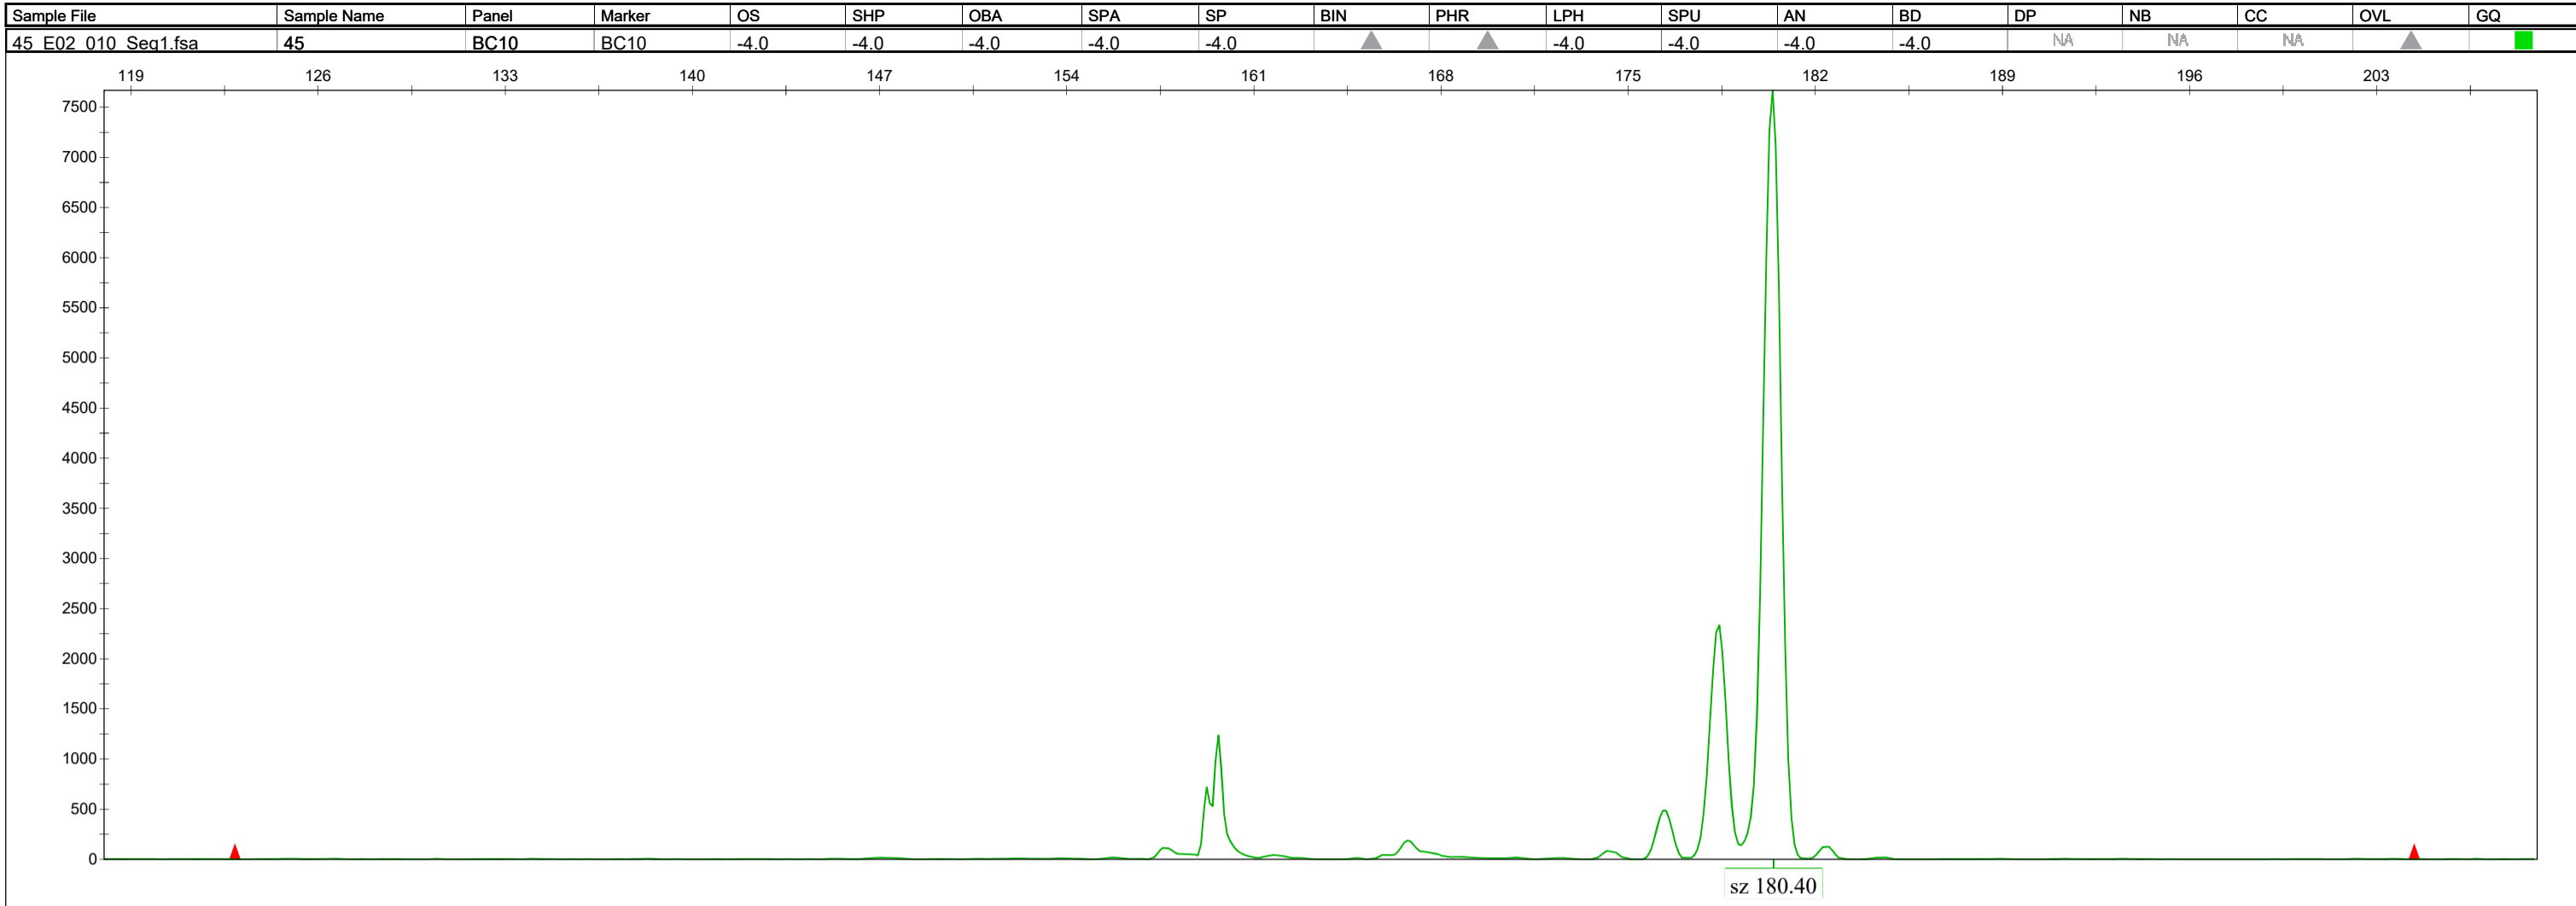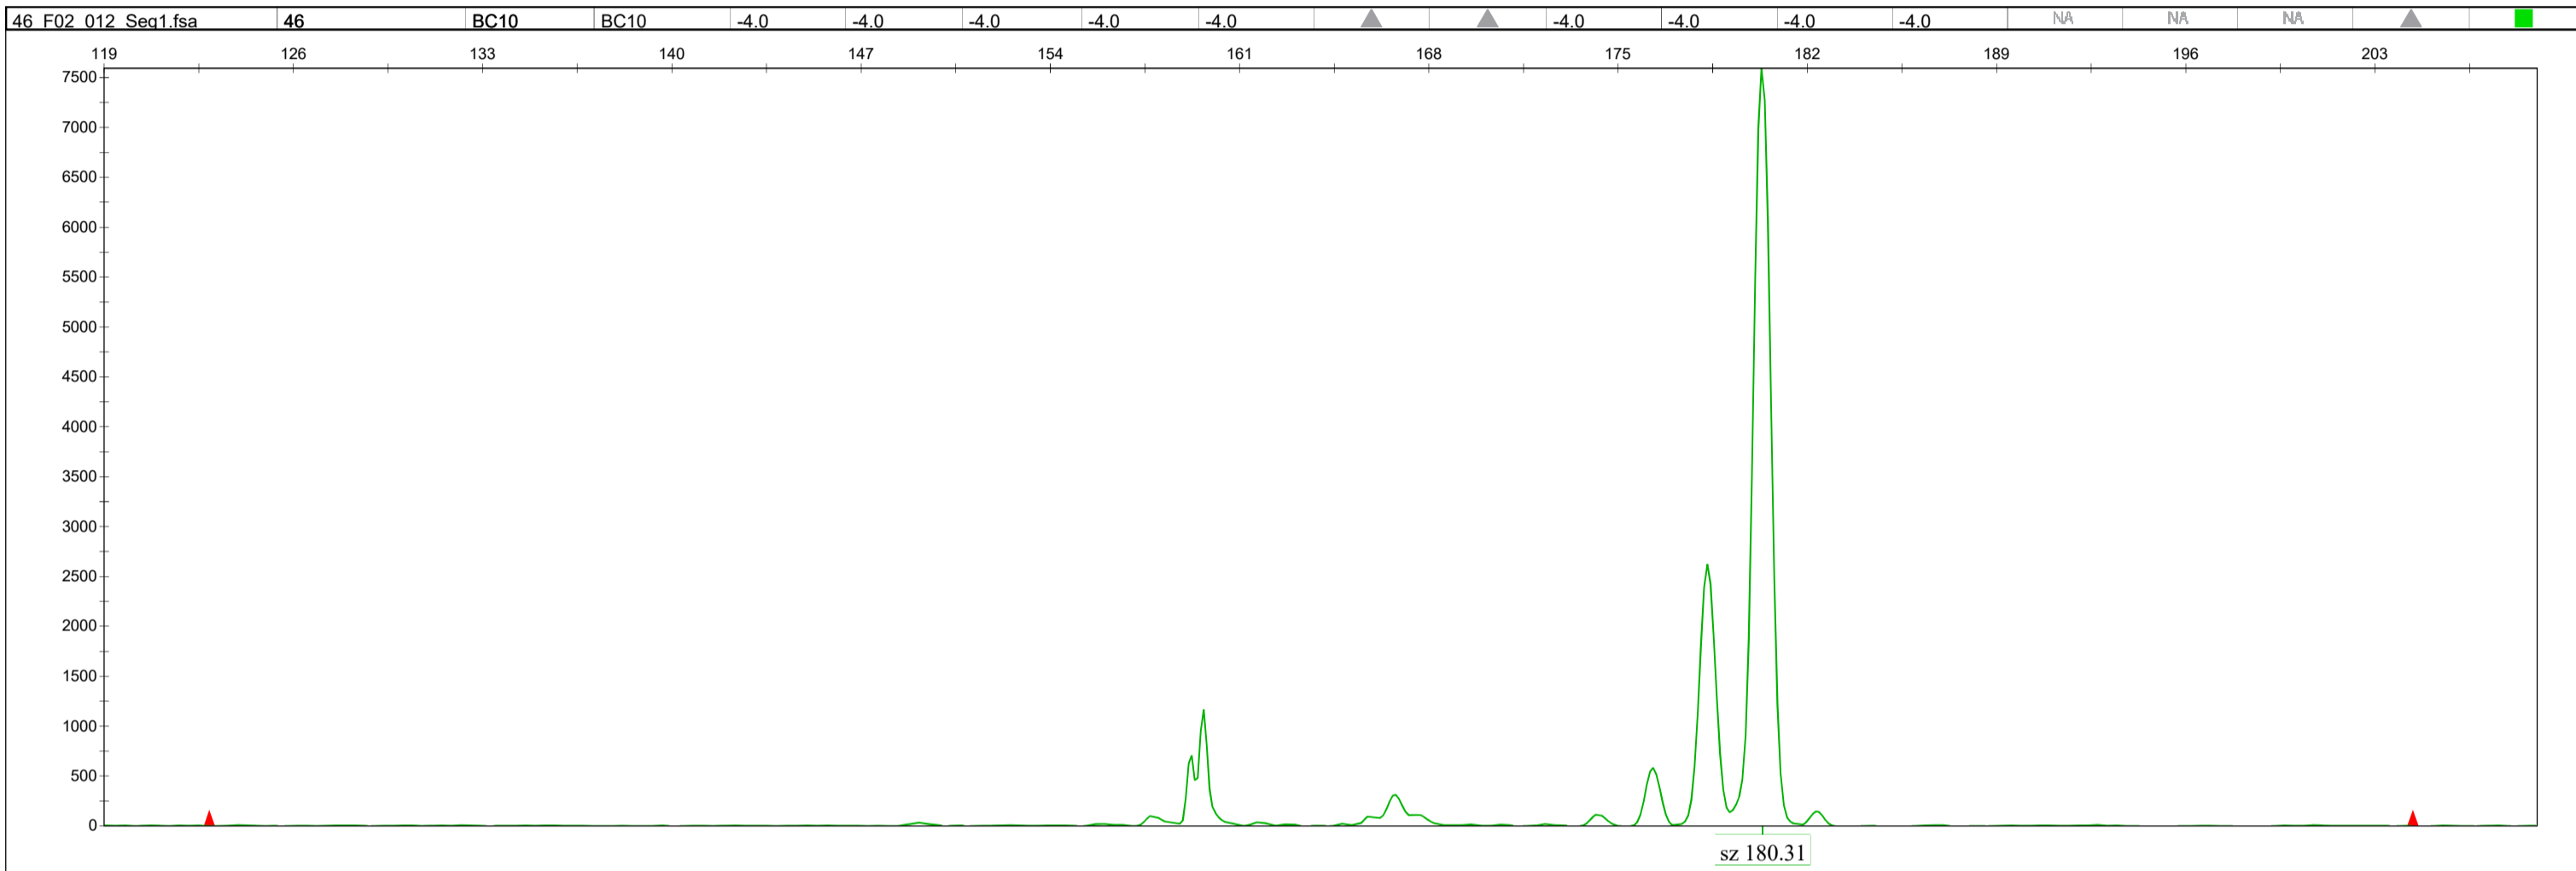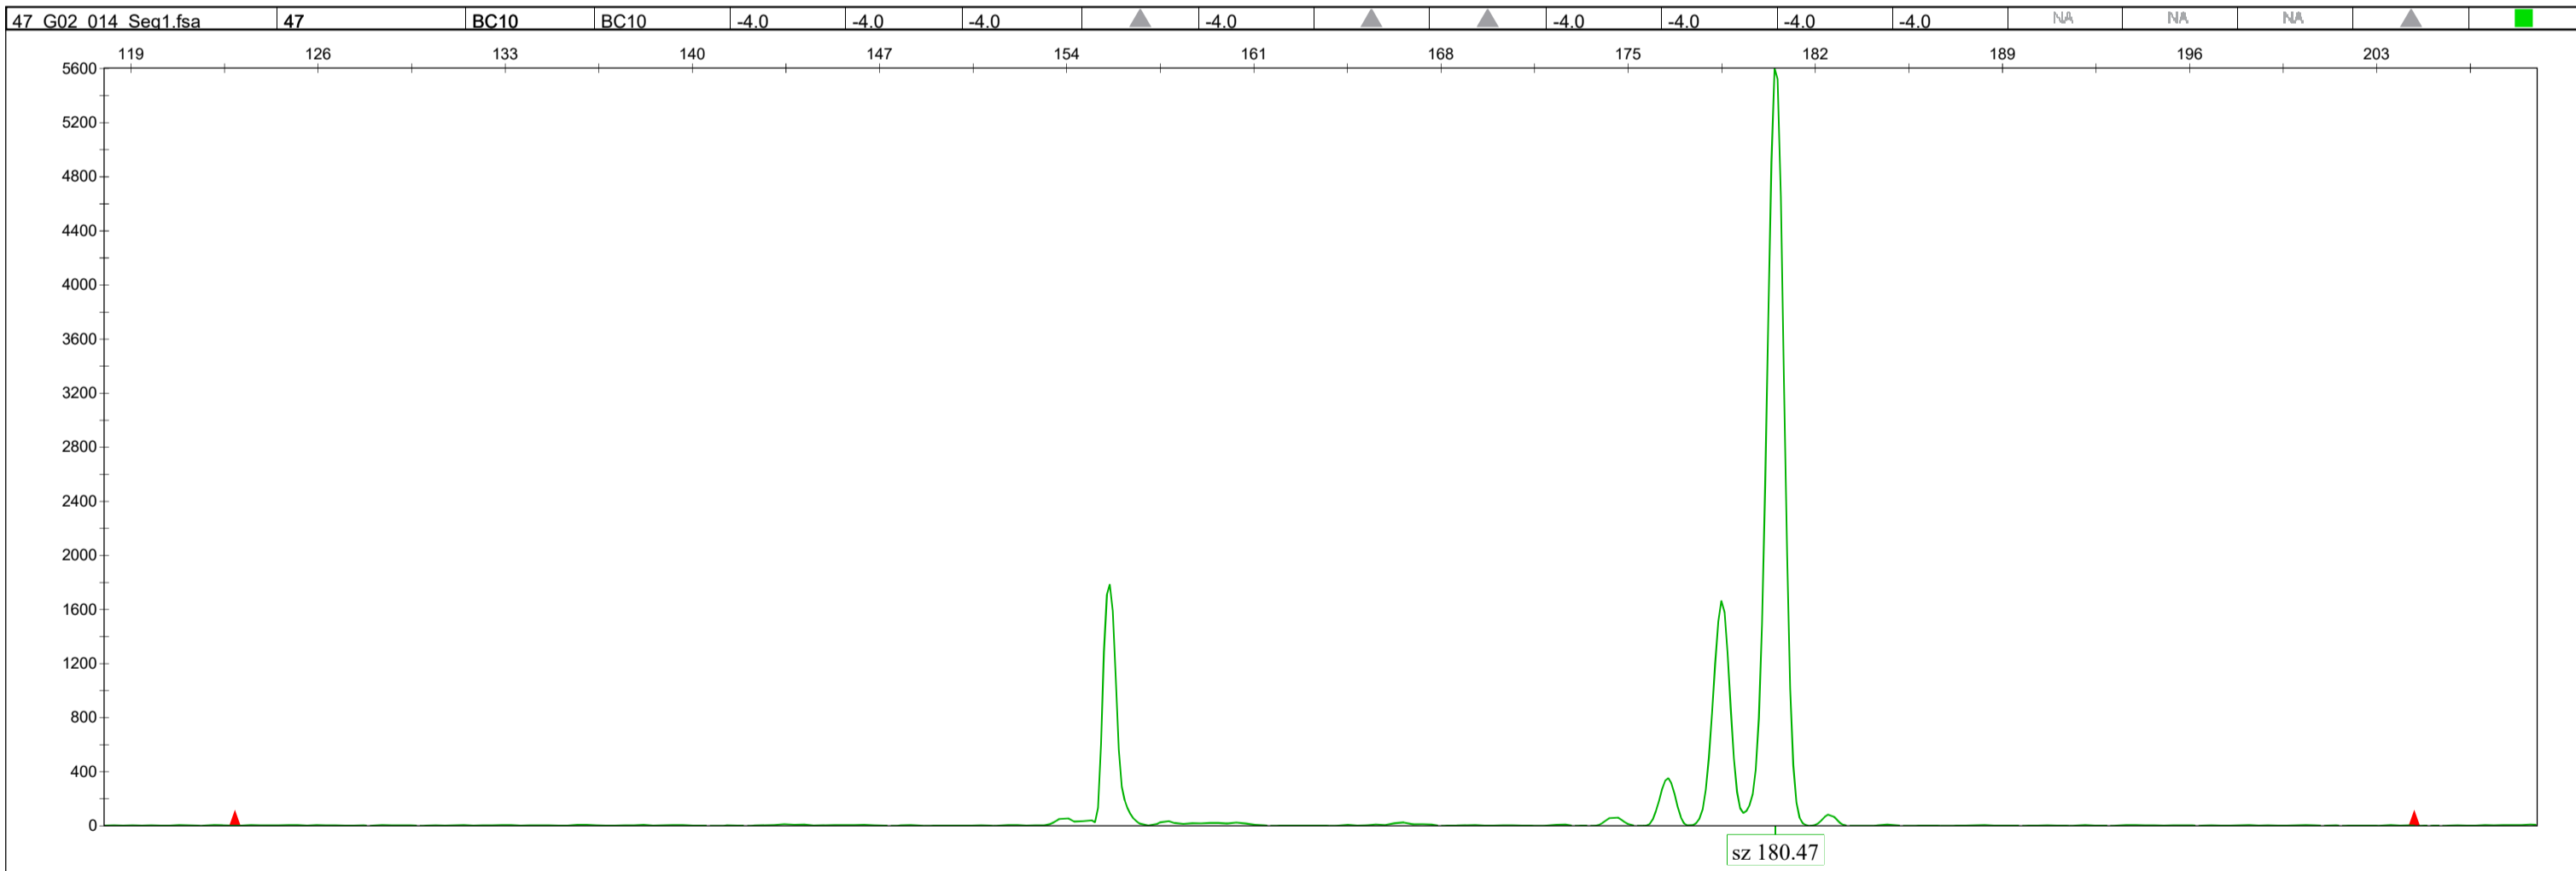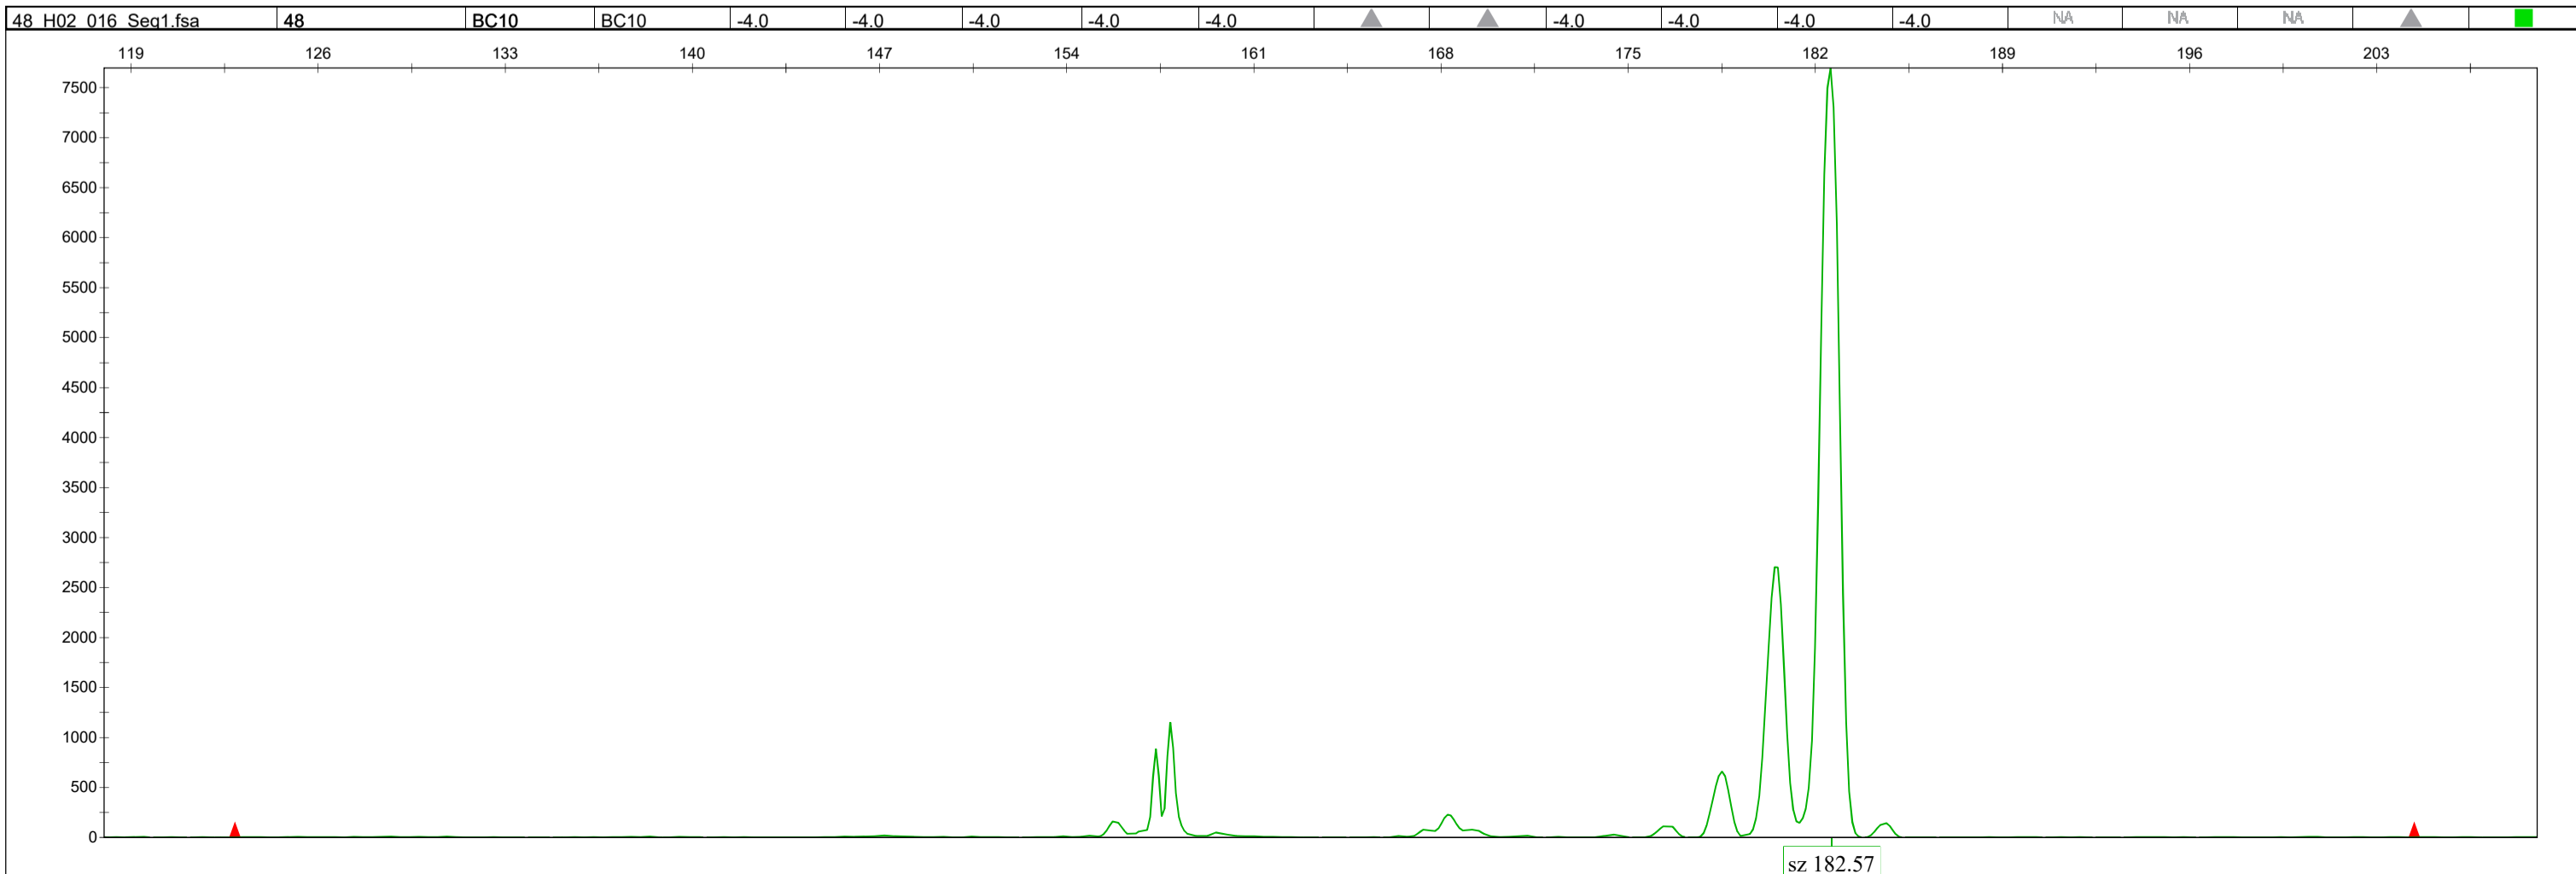

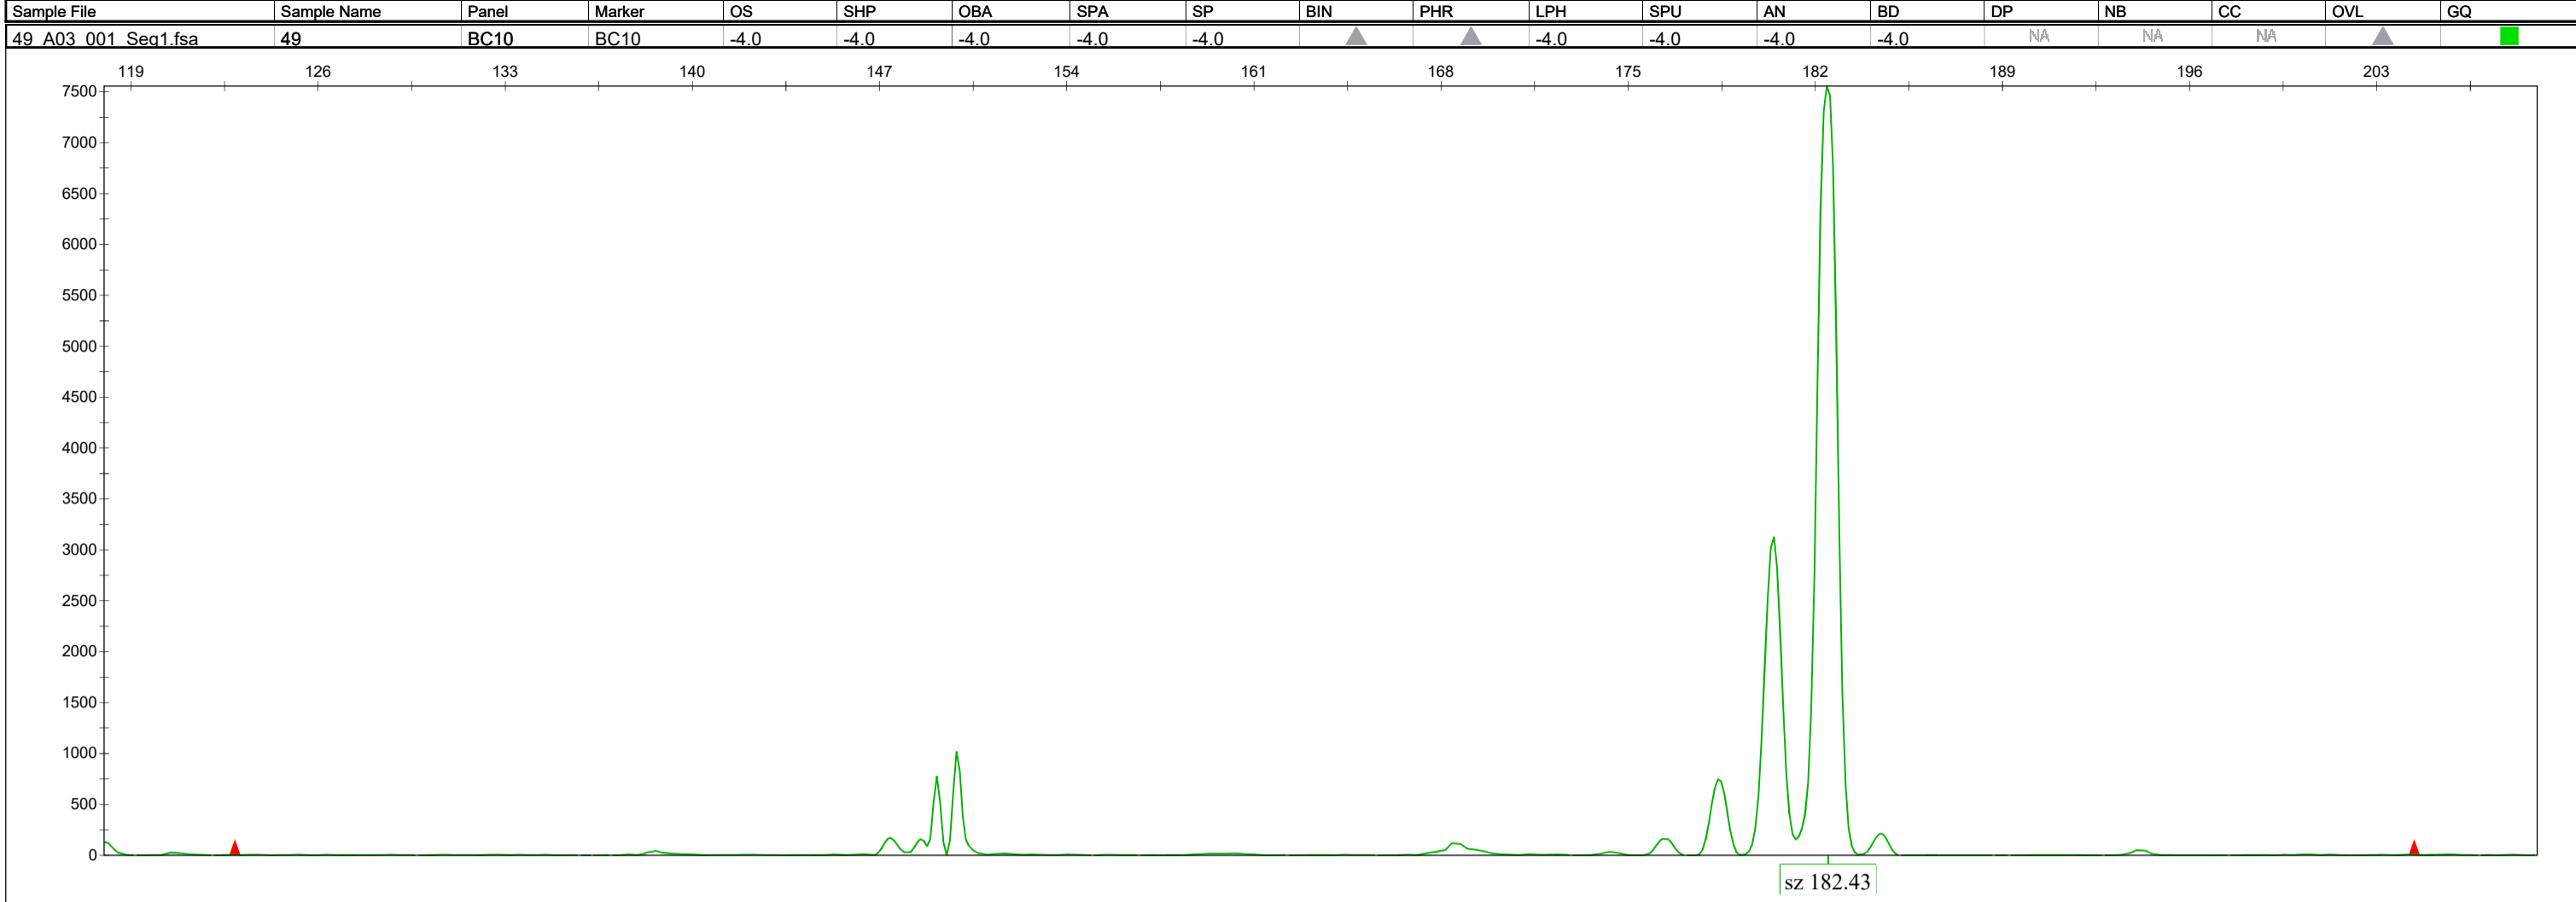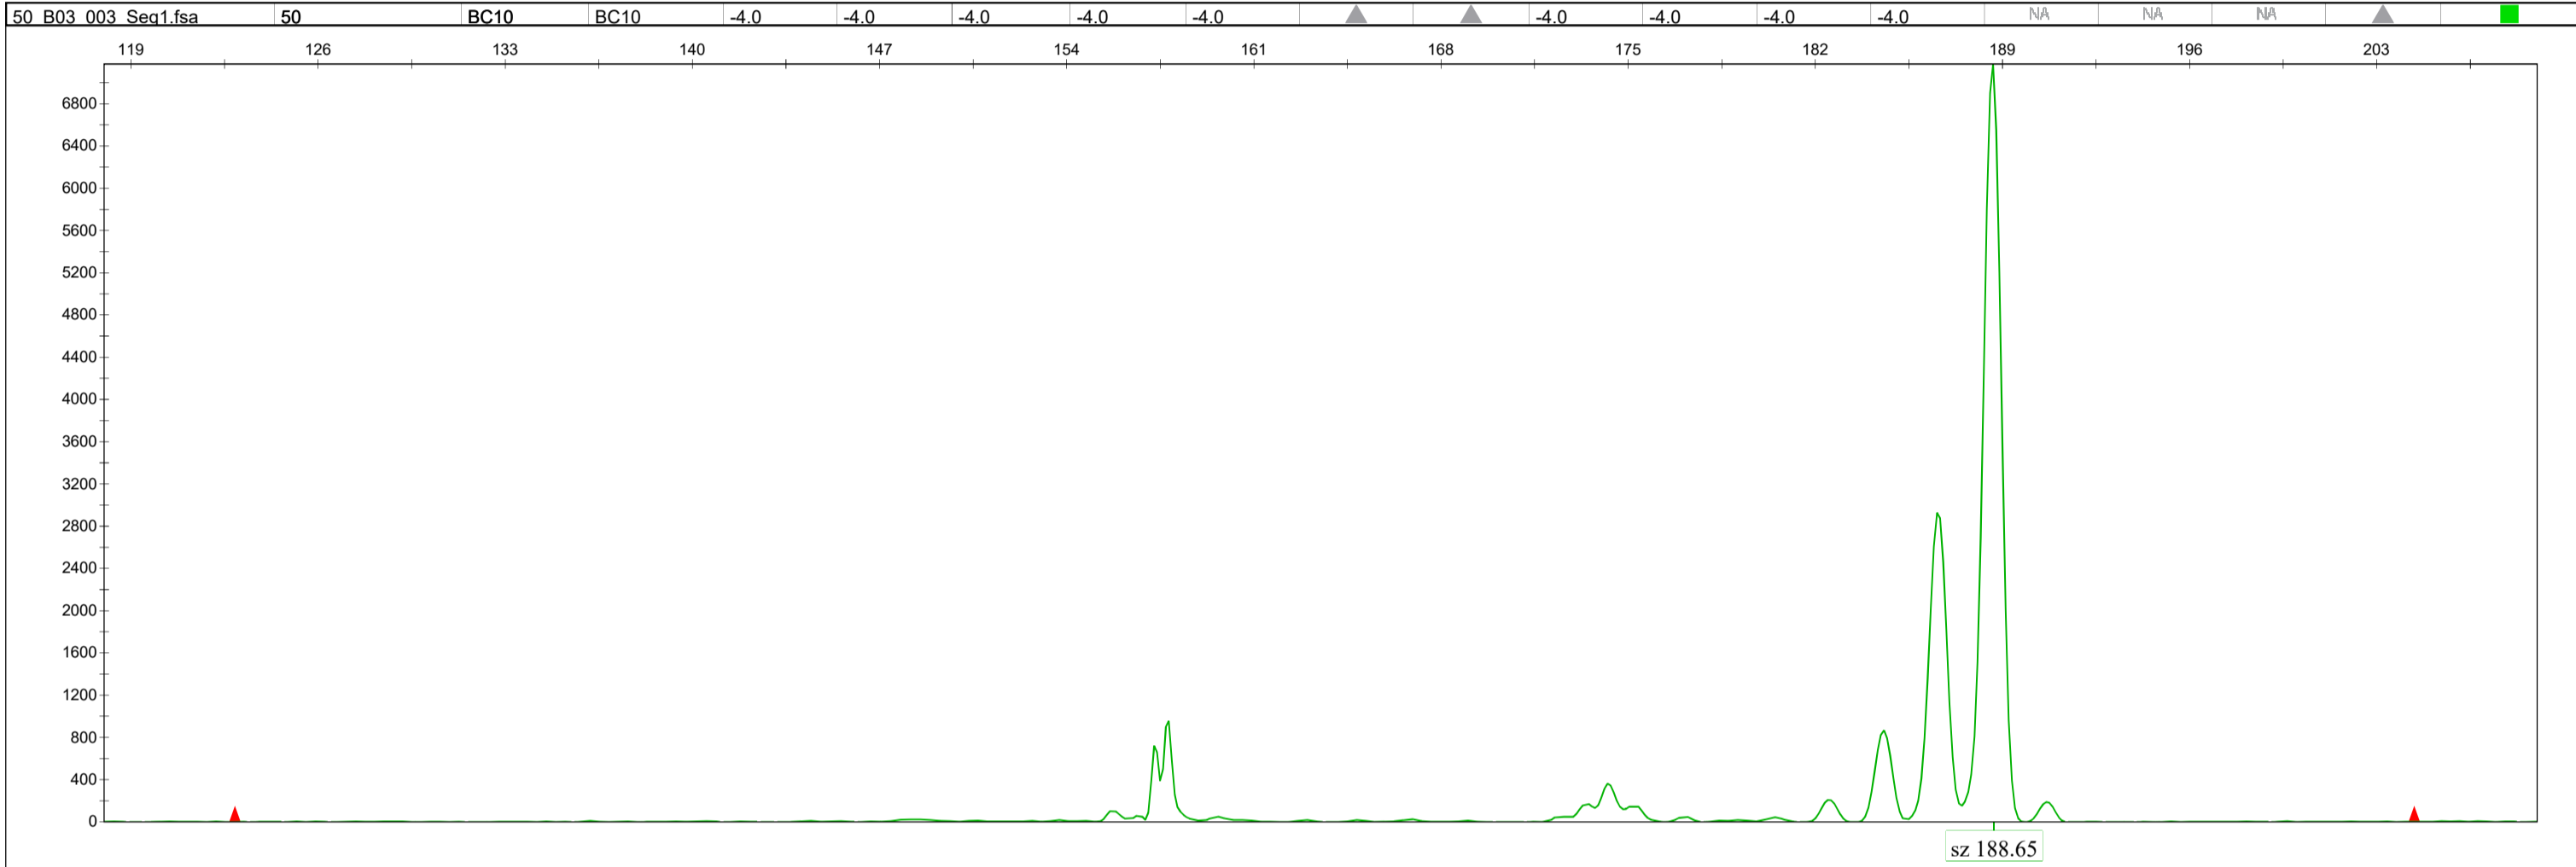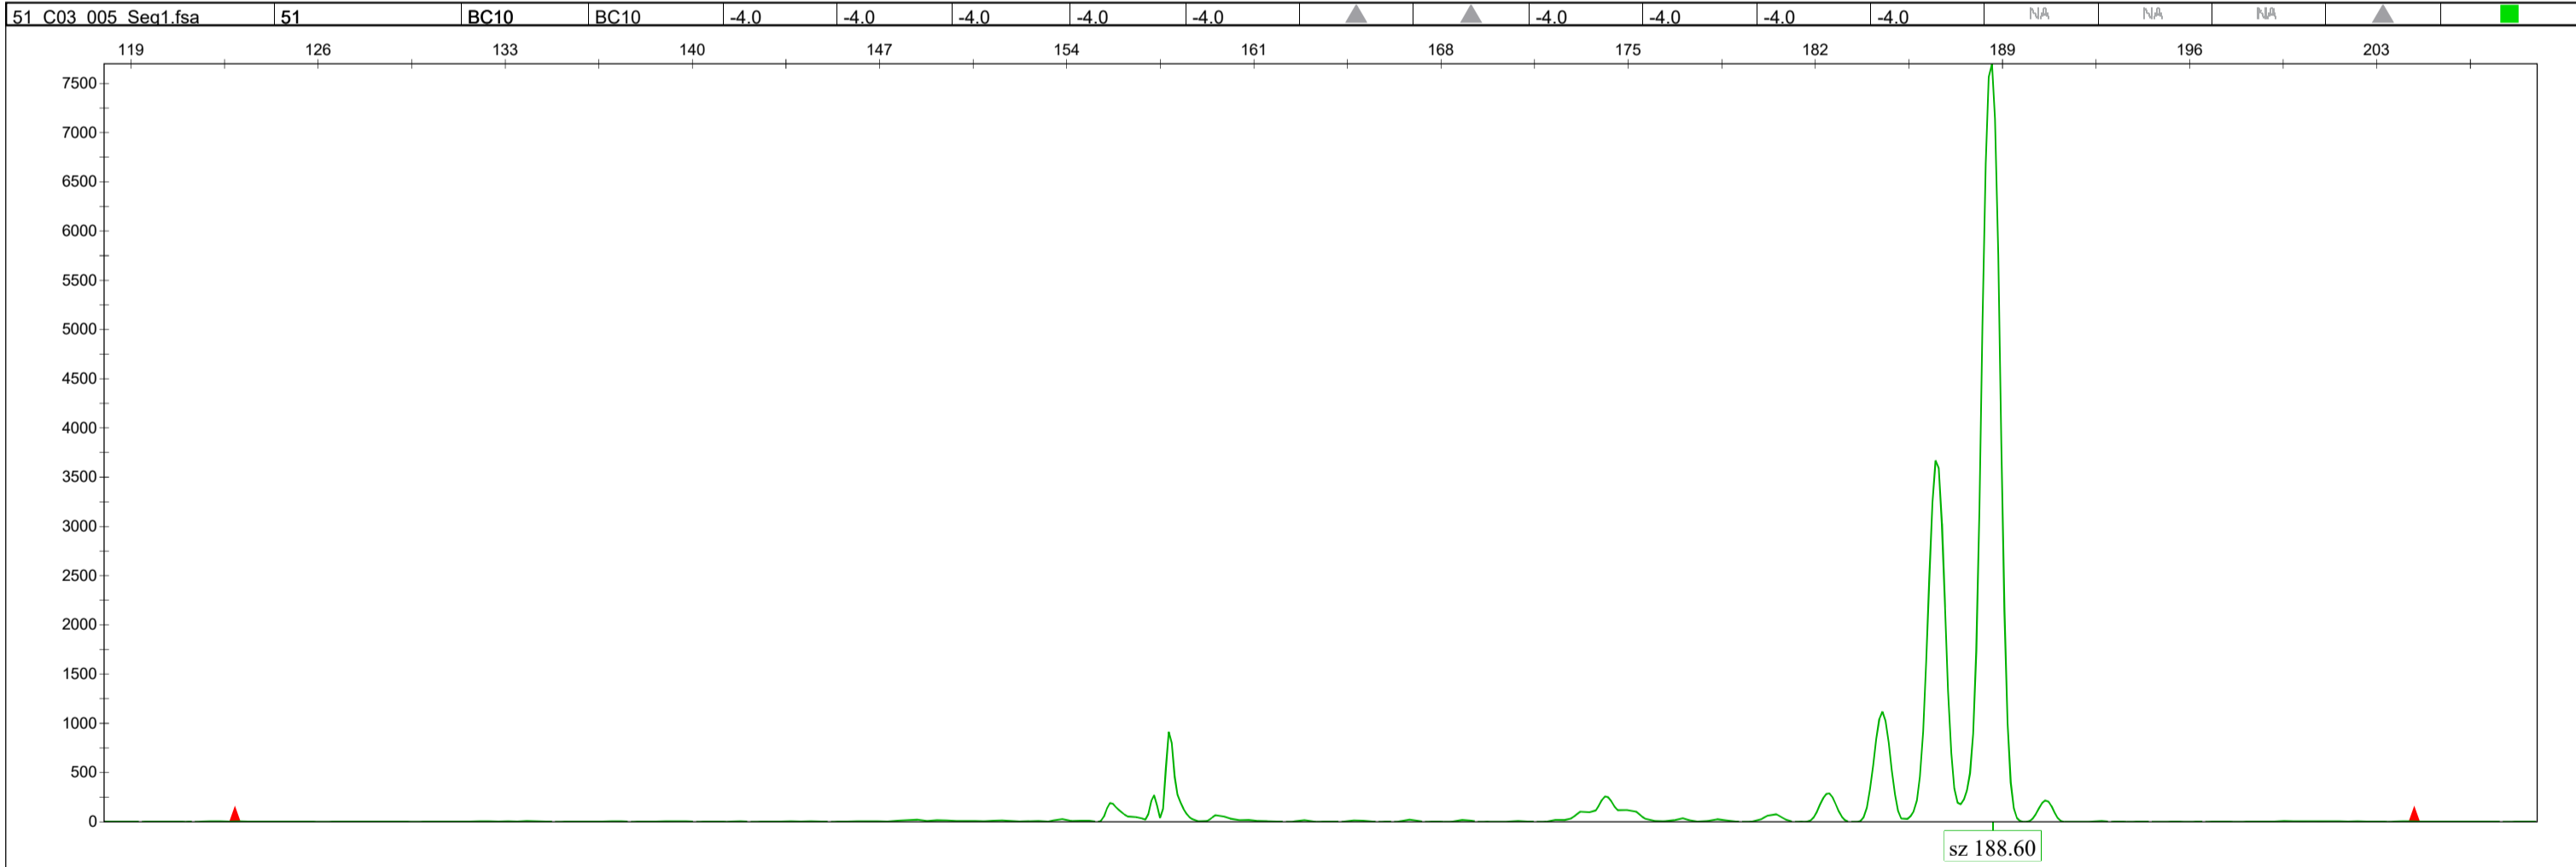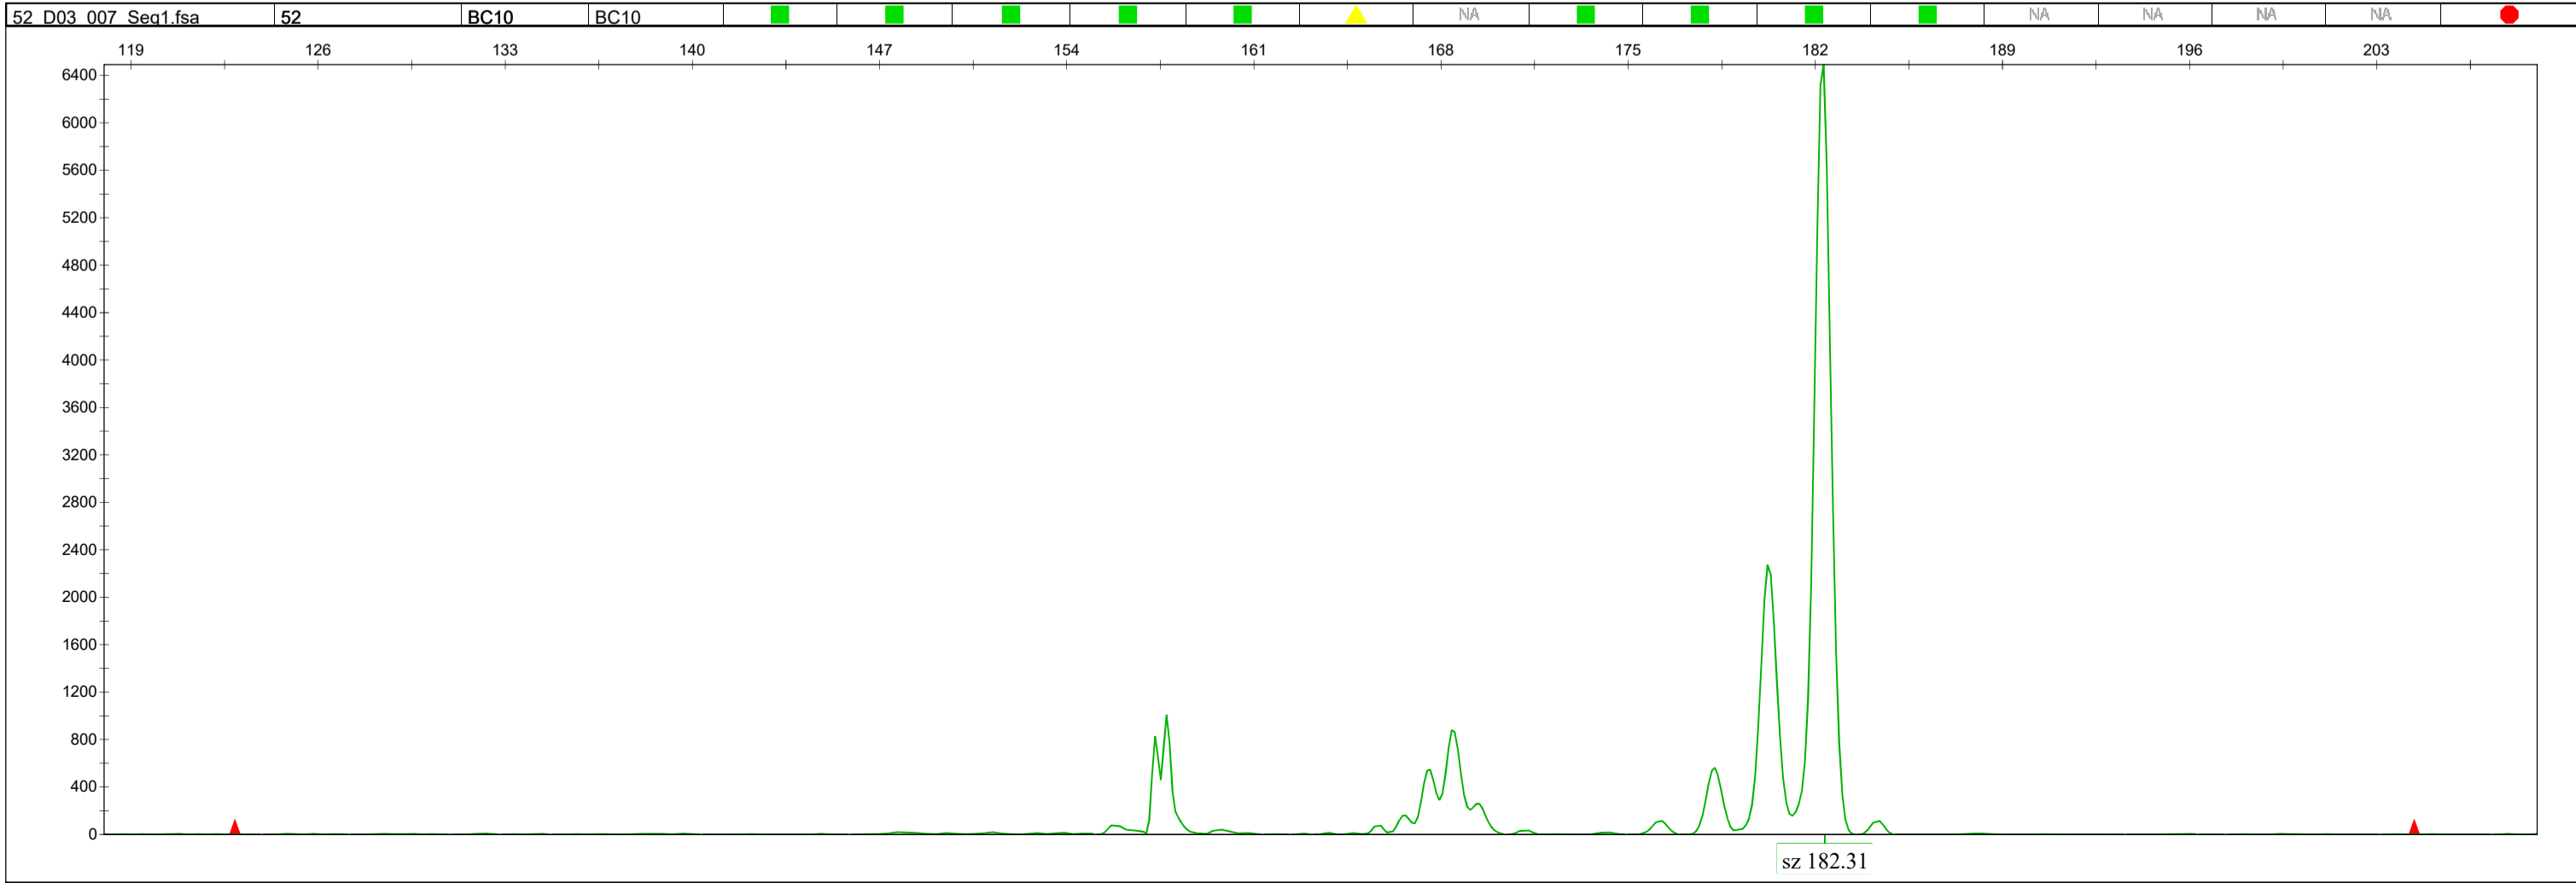

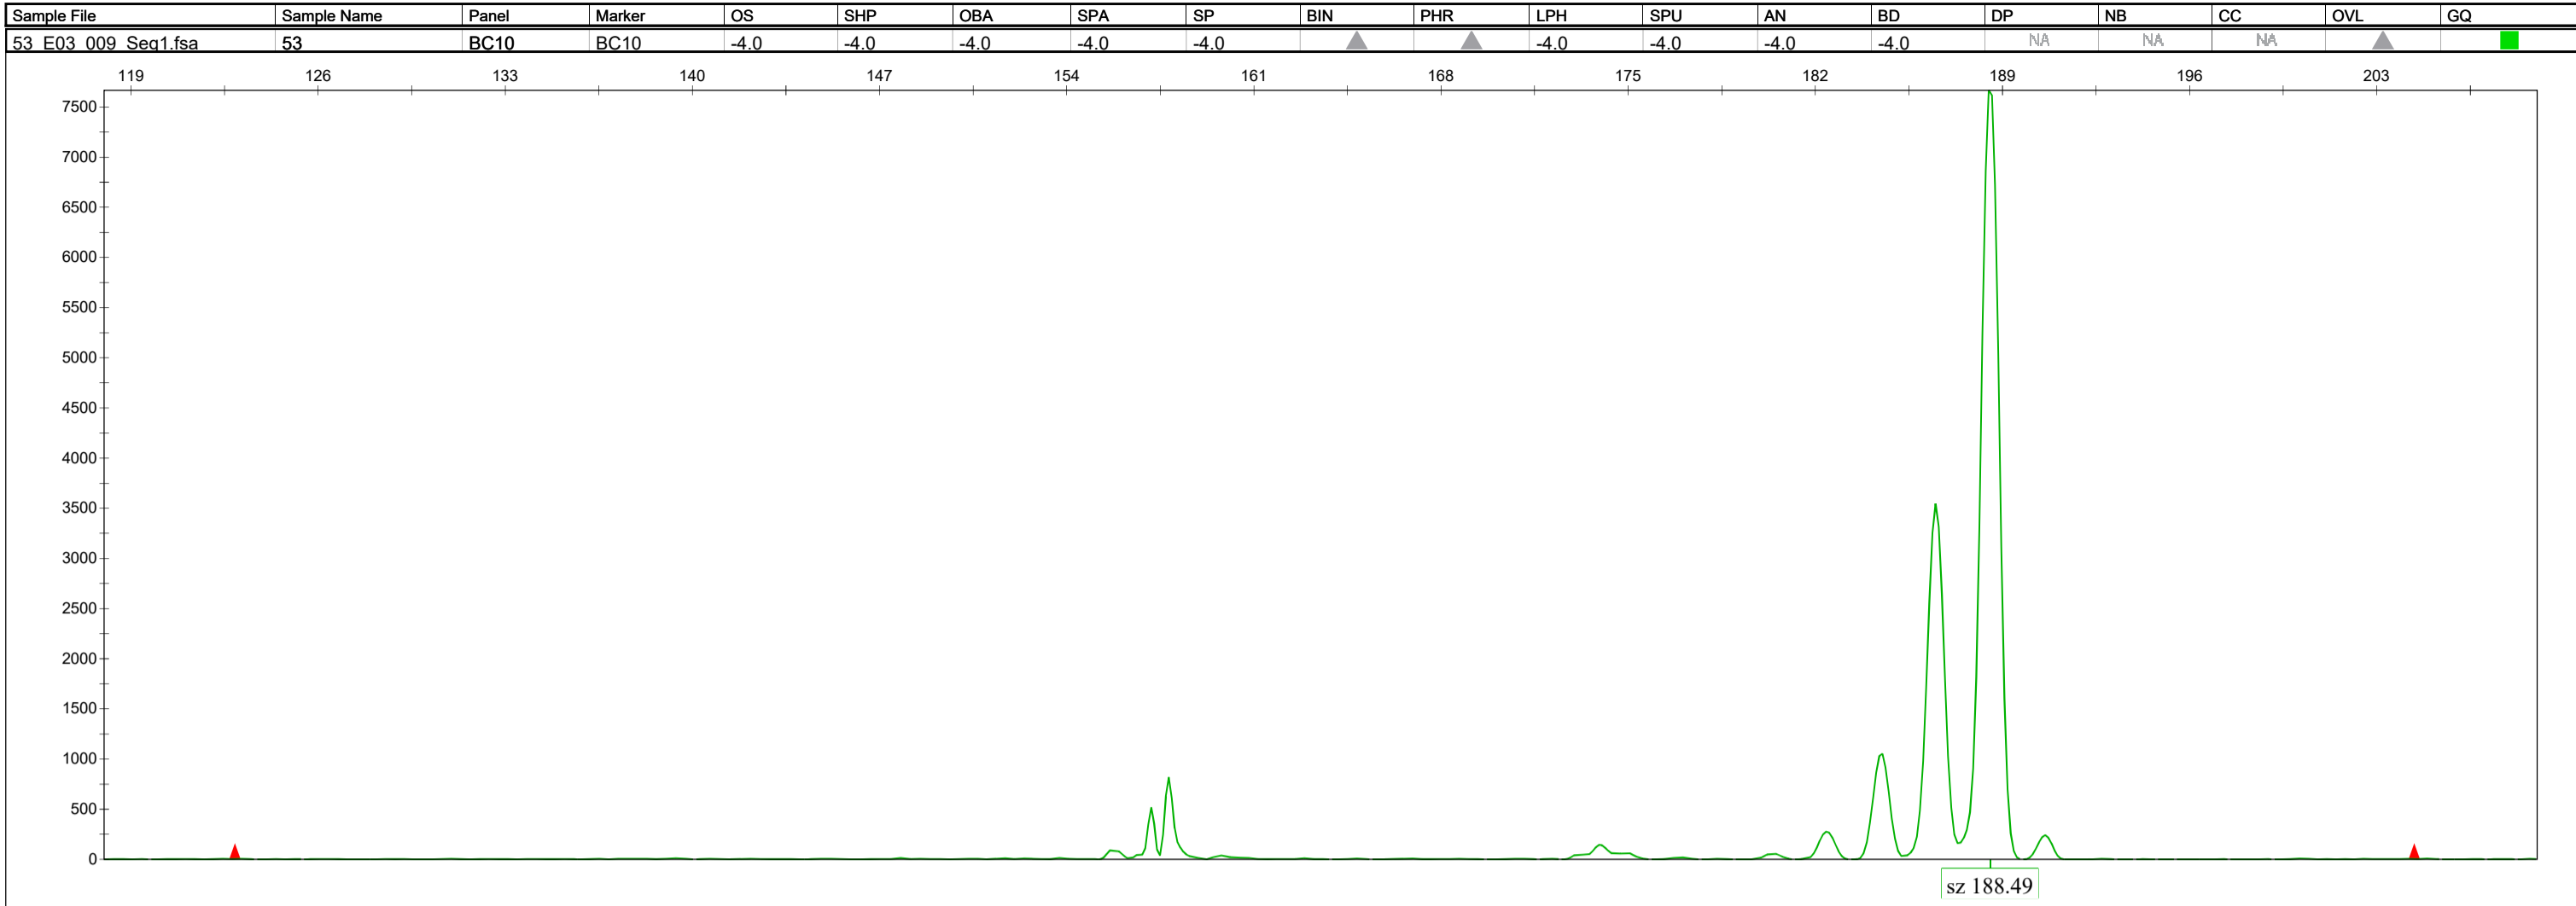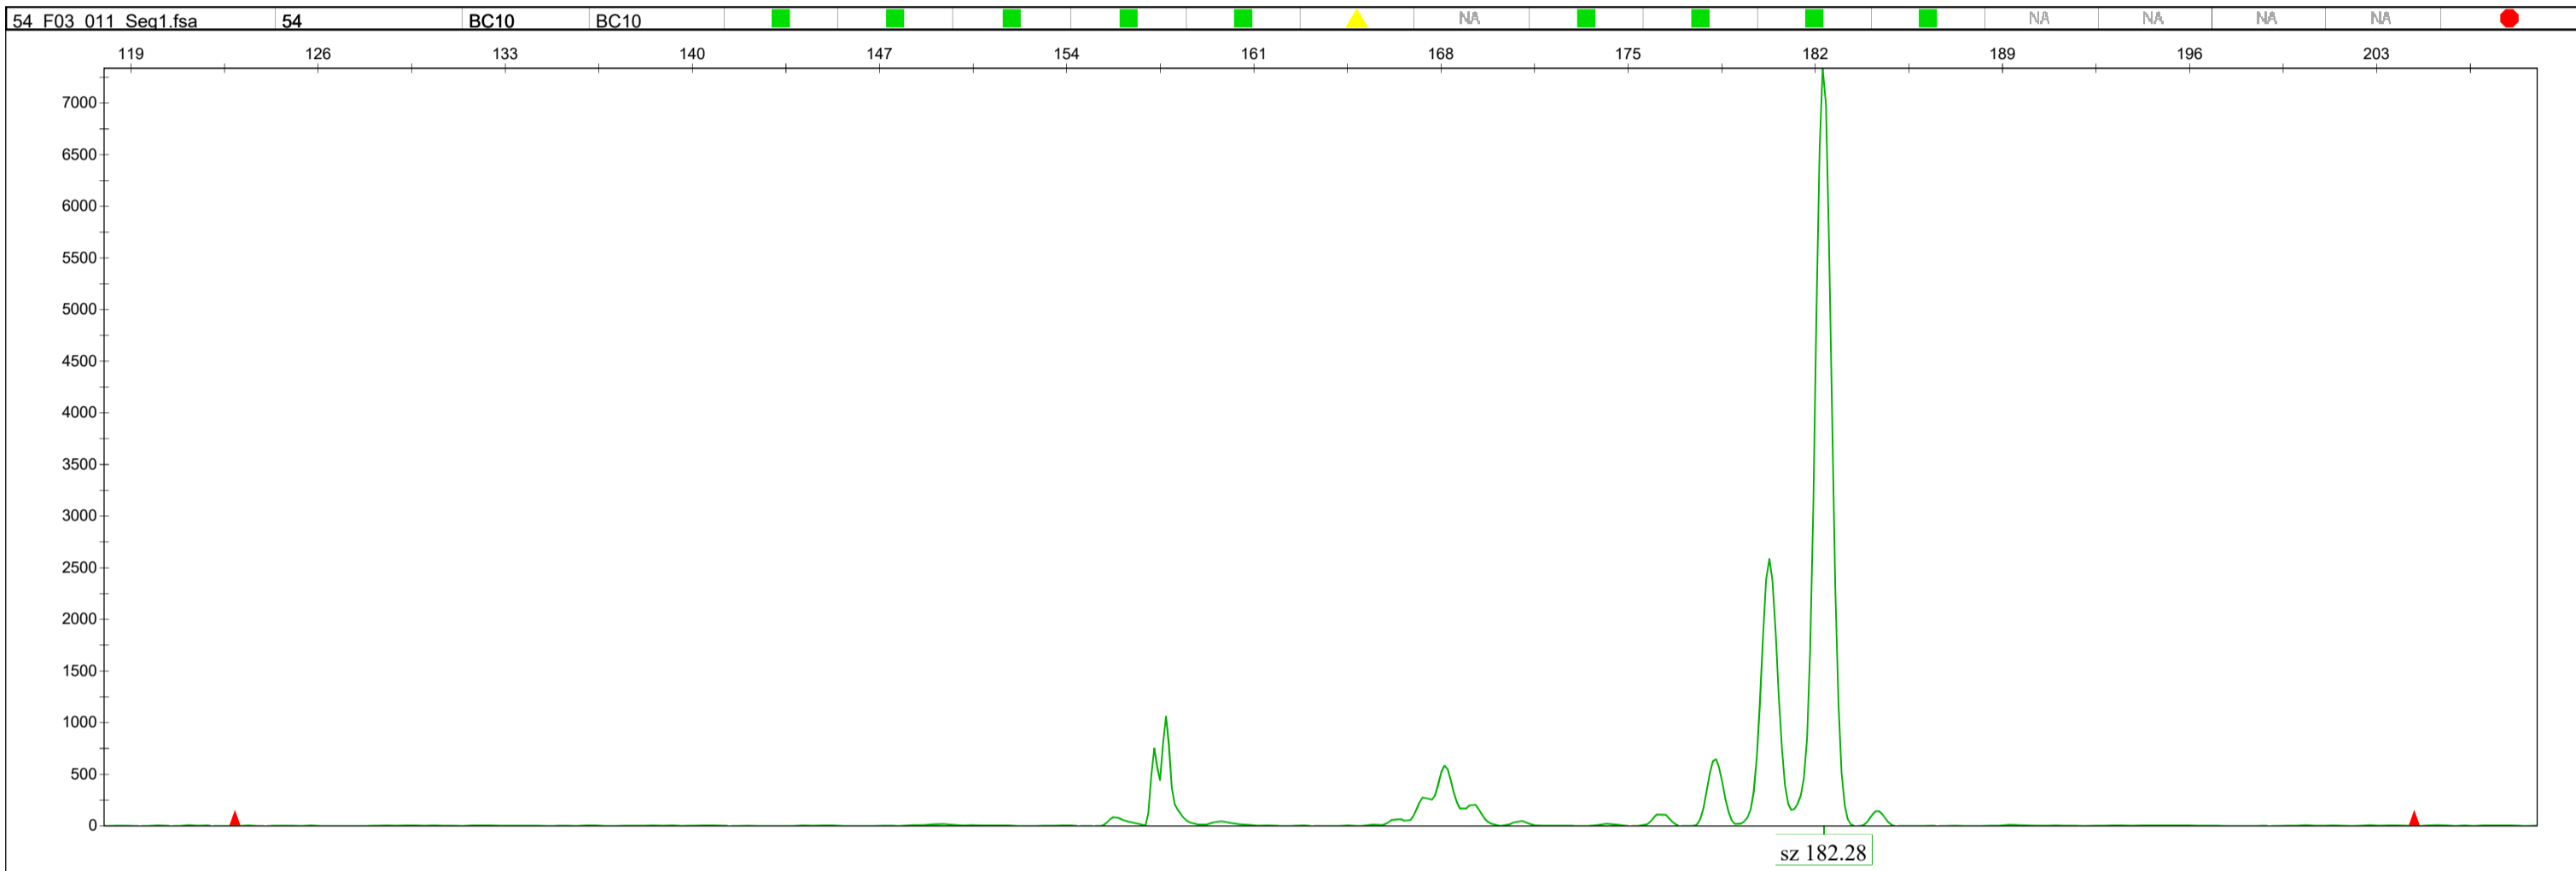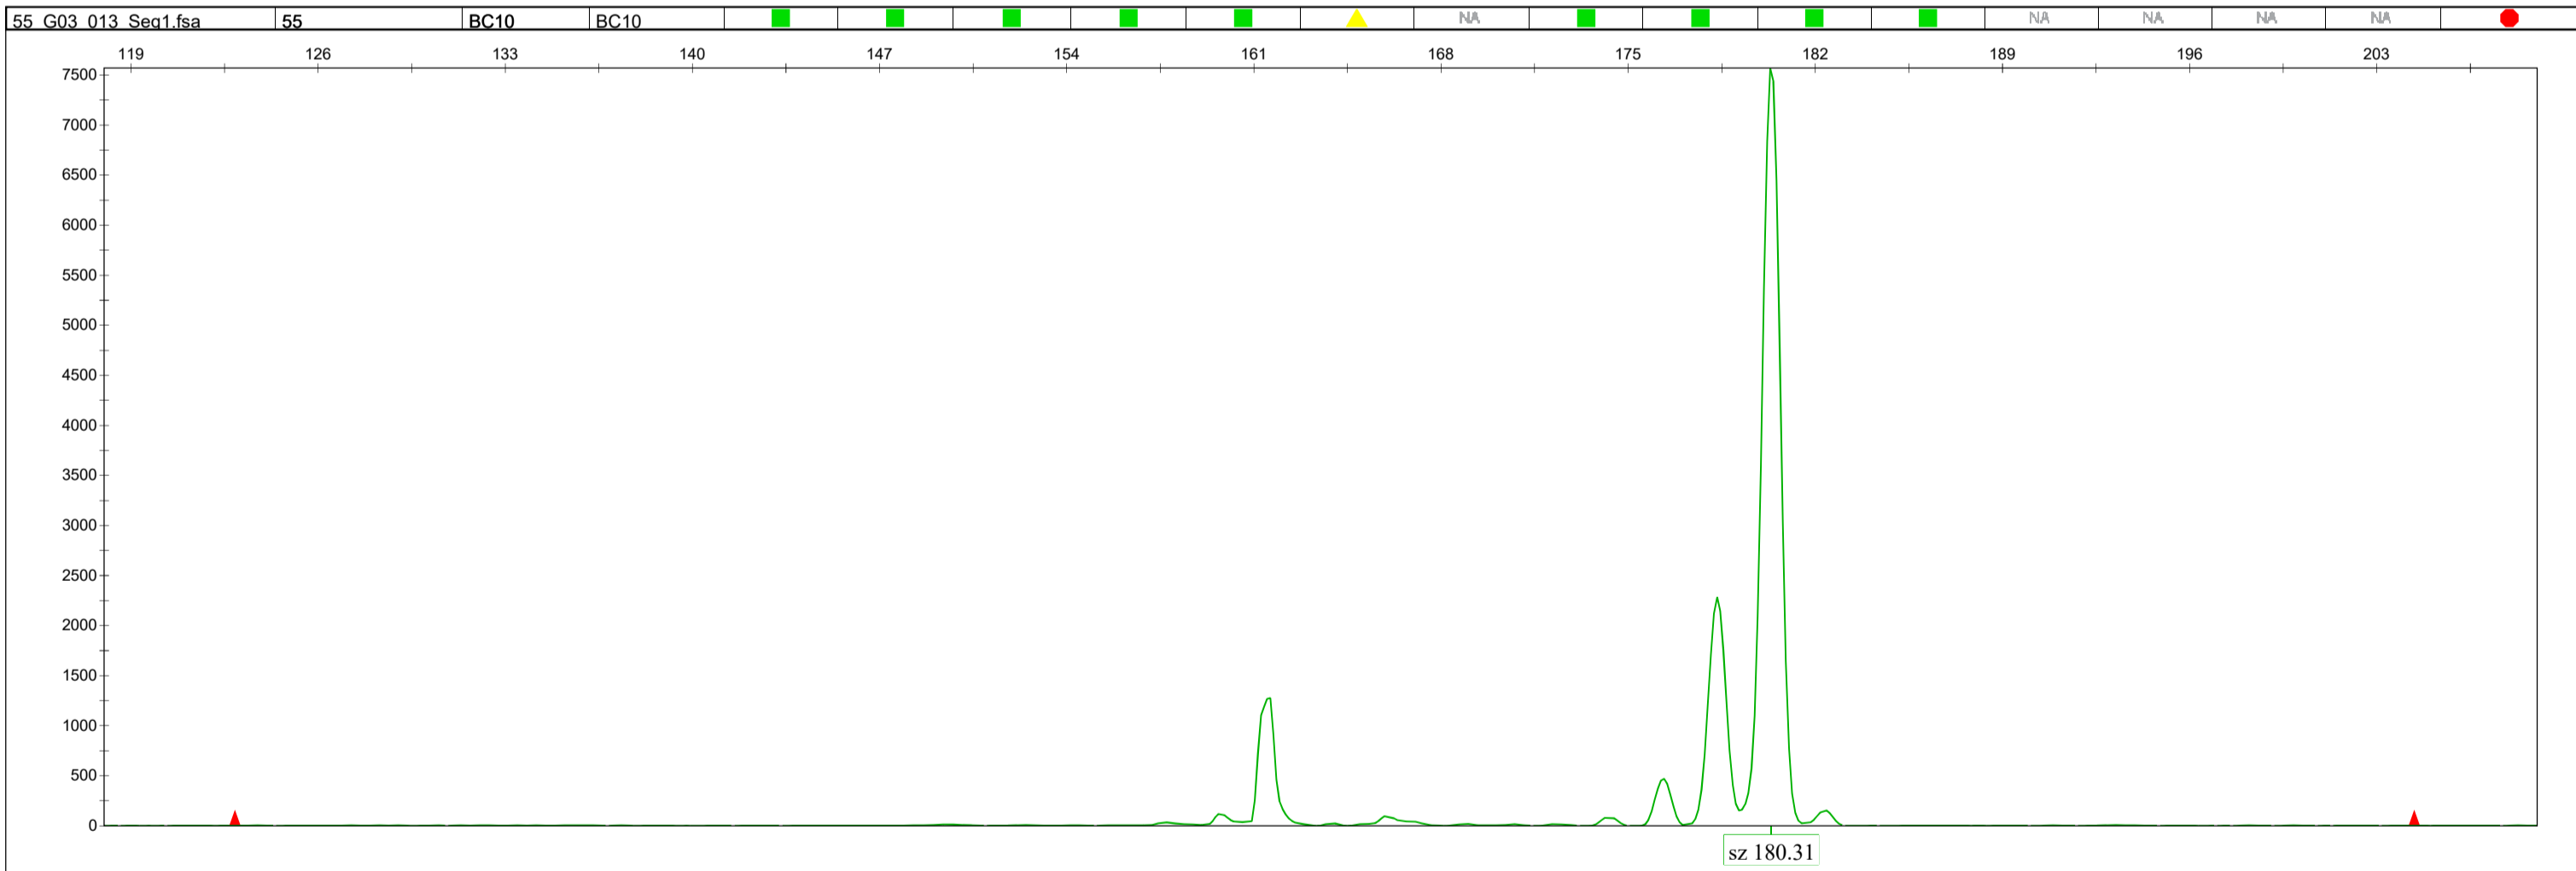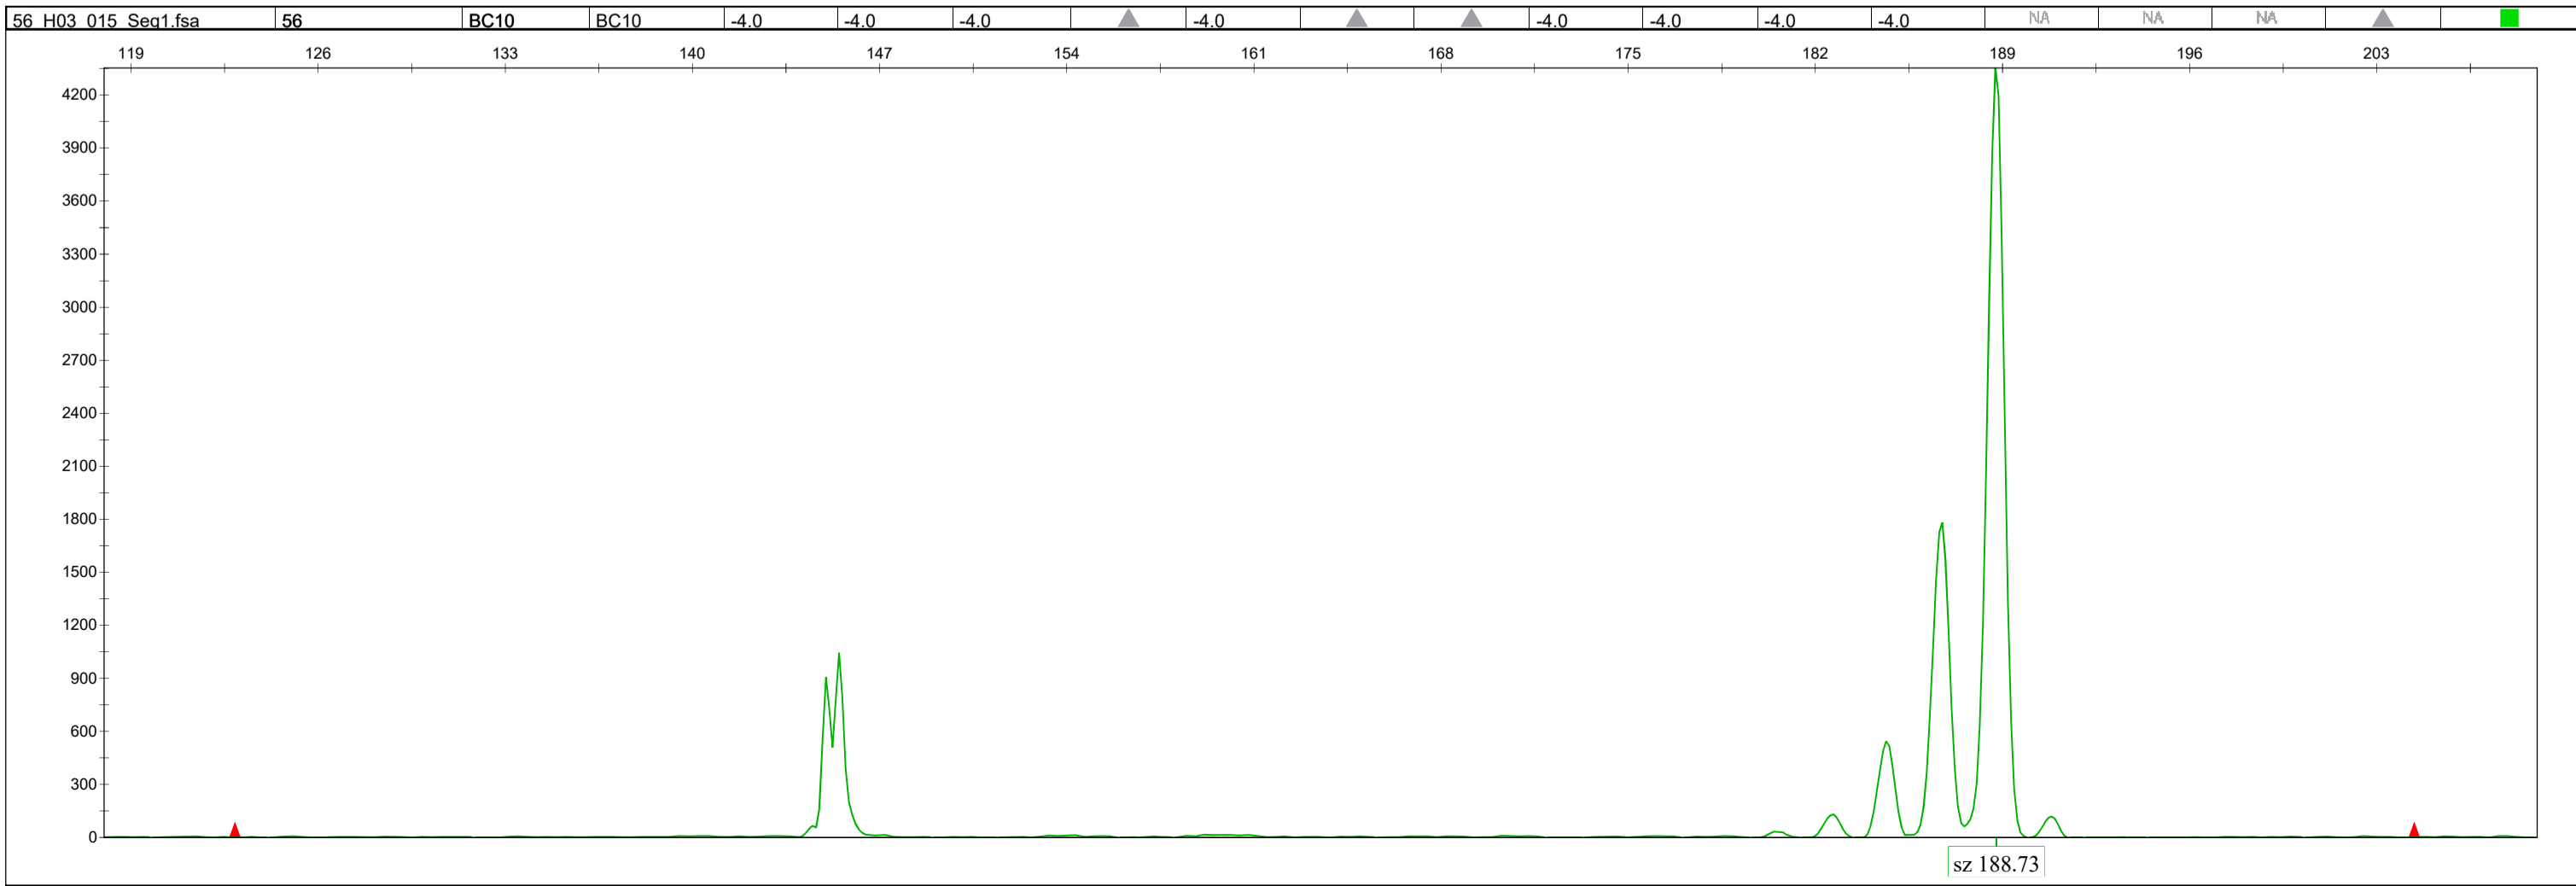

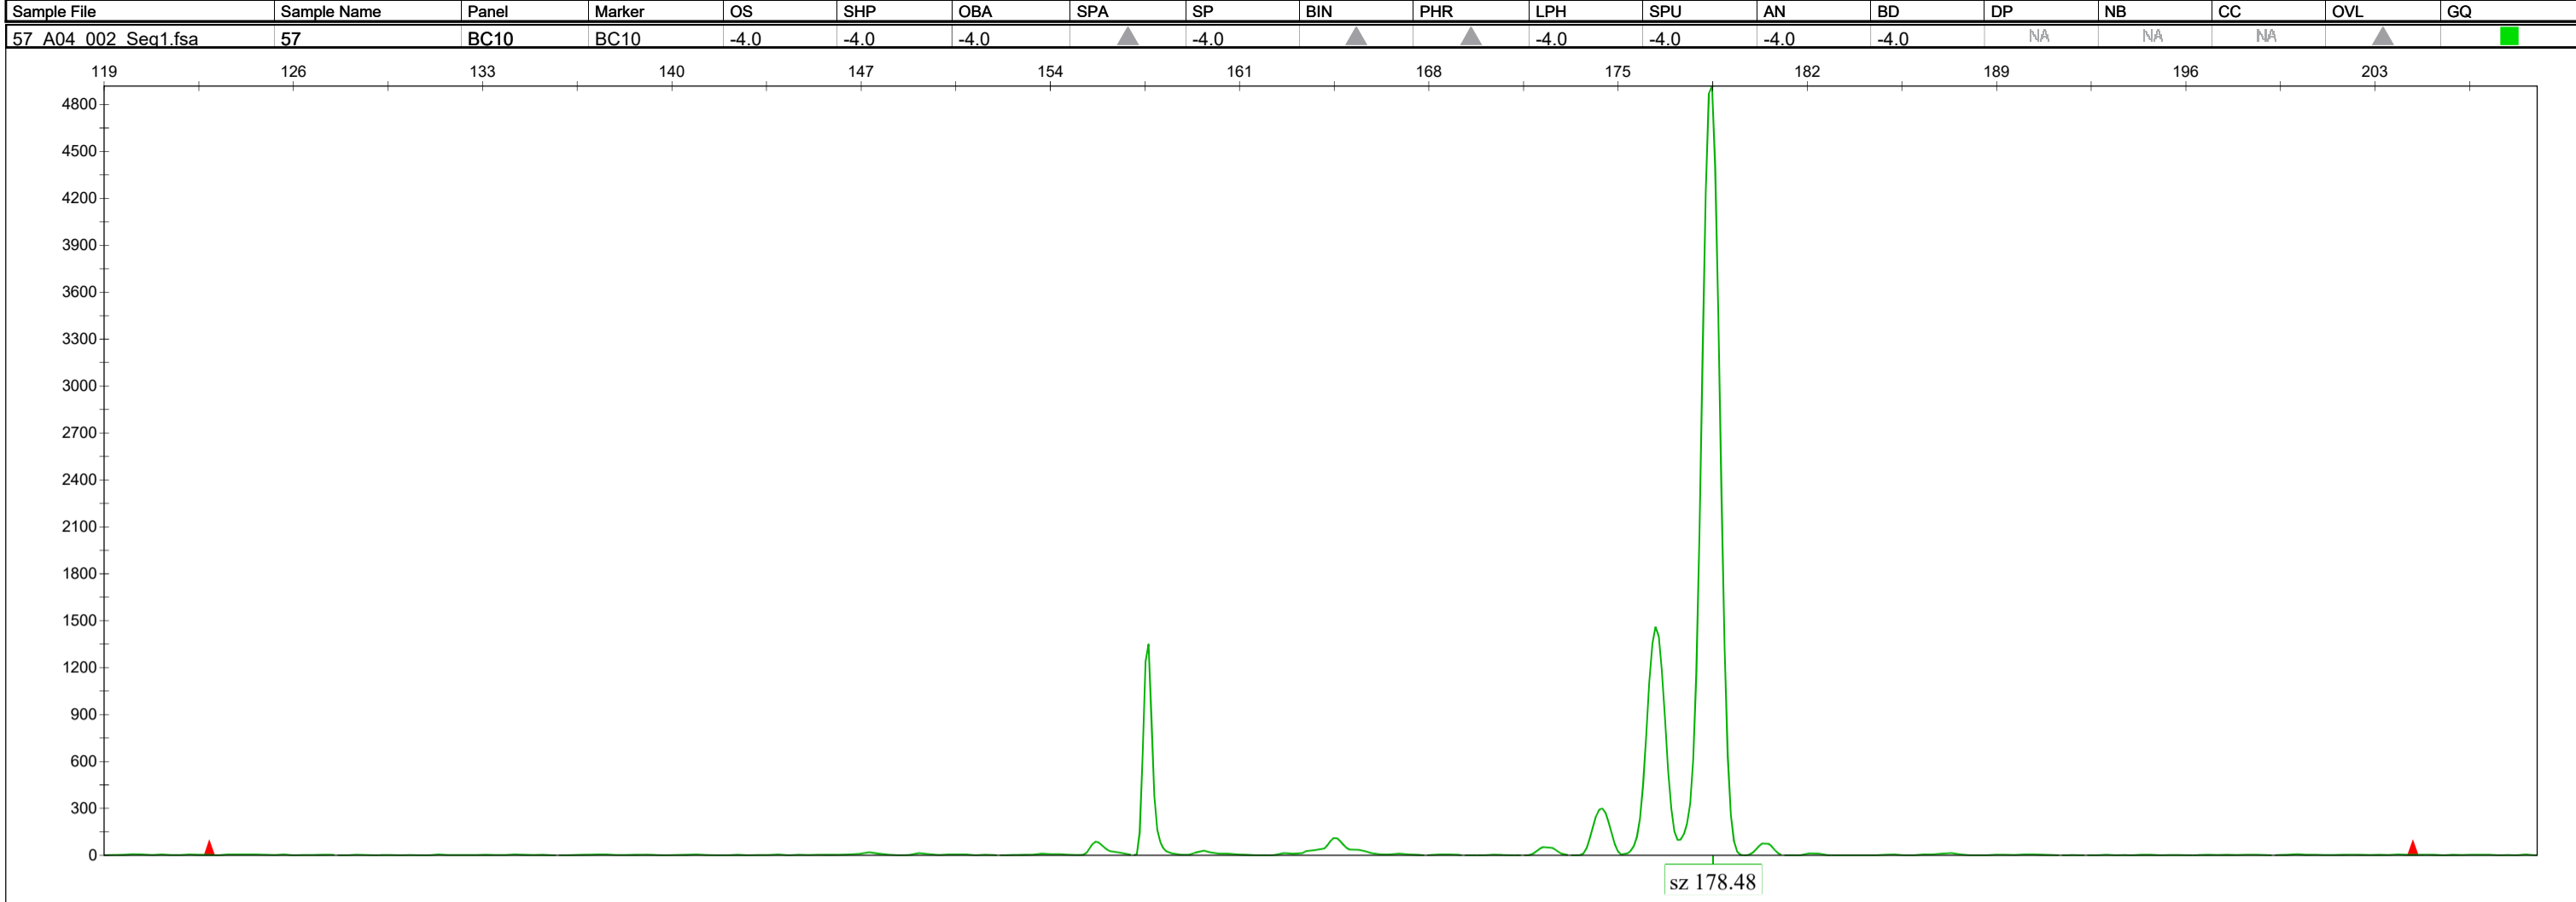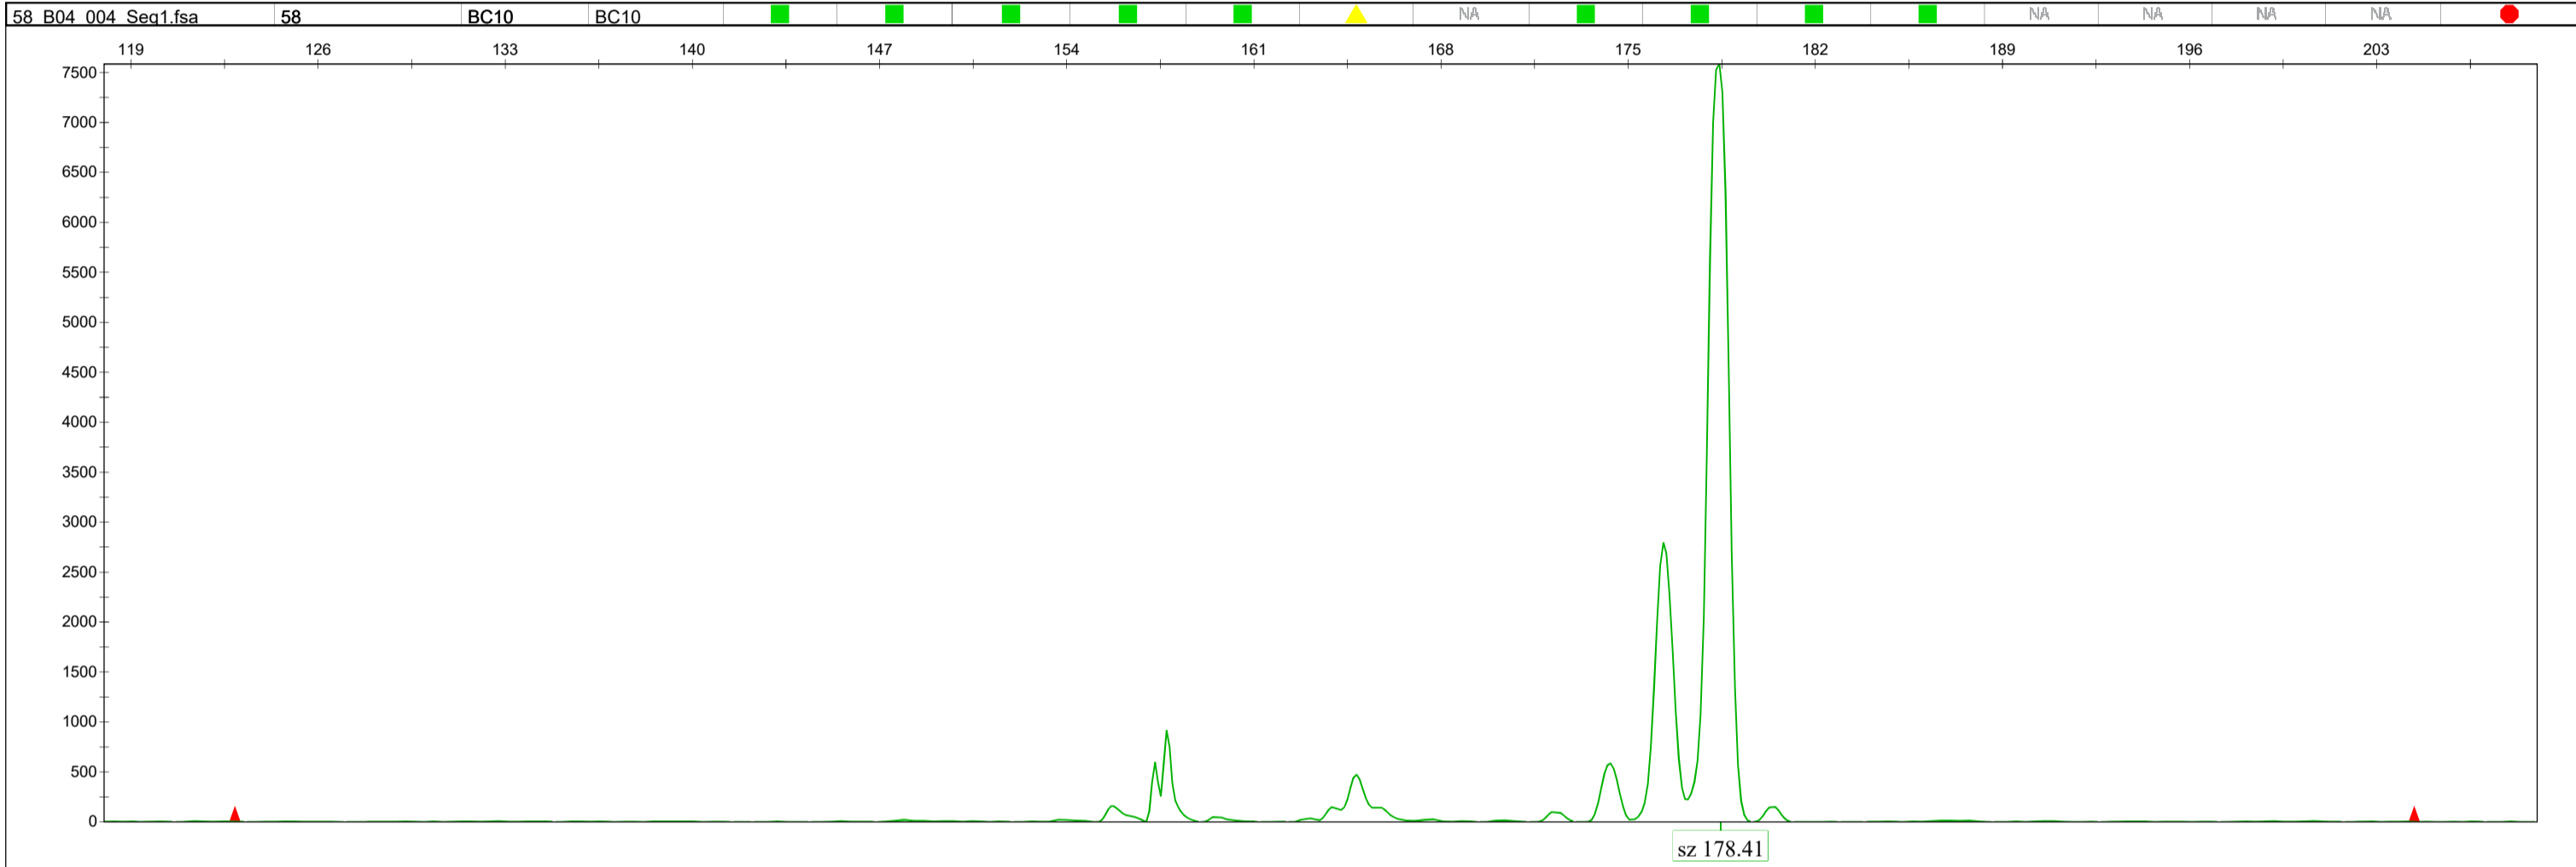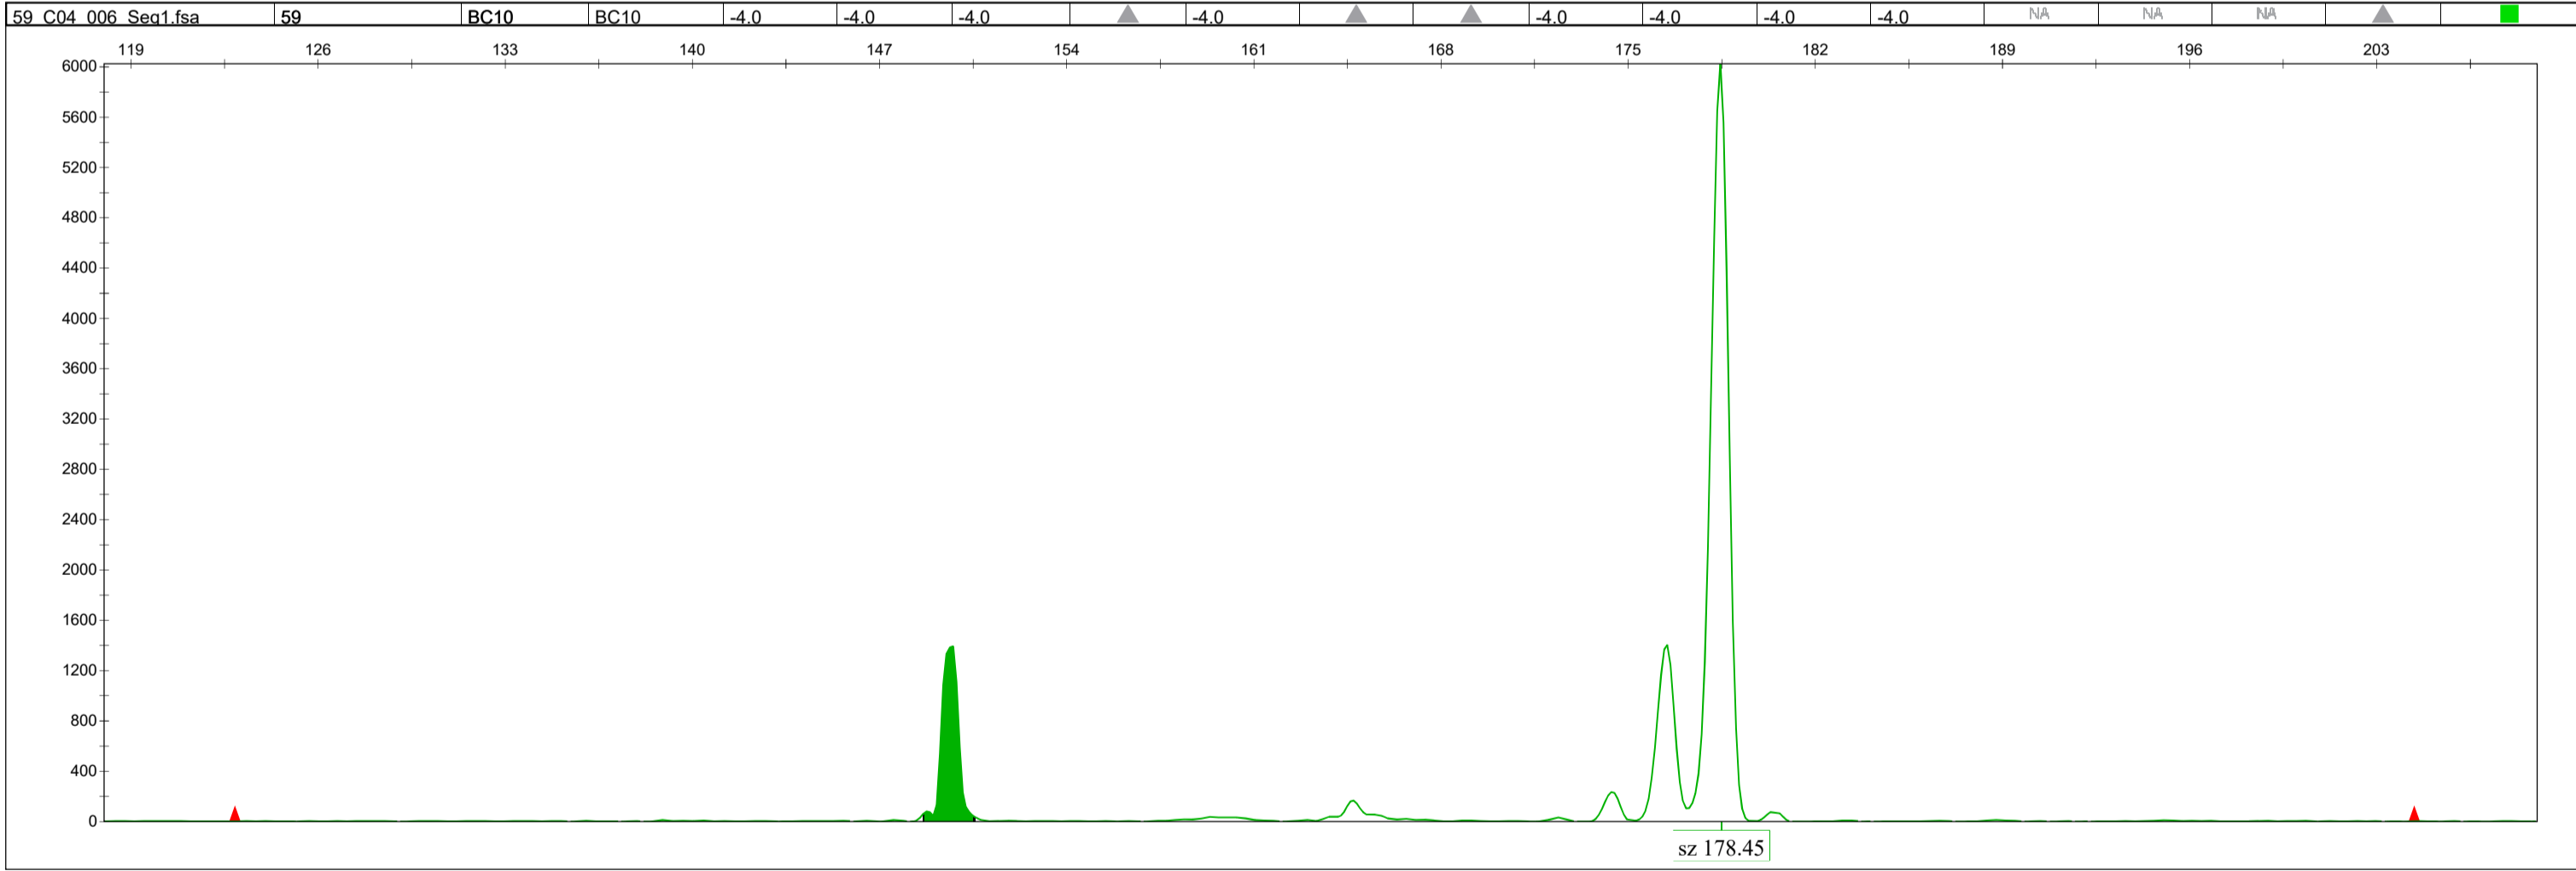

Supplement: s1 [file s1 › BC10.pdf]
